# Supplementary material for: Integrative analysis of DNA methylation and gene expression to identify key epigenetic genes in glioblastoma
Source: Aging (Albany NY). 2019 Aug 8;11(15):5579–92. doi: 10.18632/aging.102139 (PMC6710056; doi:10.18632/aging.102139)
Supplement: Supplementary Table 1 [file aging-11-102139-s002.xlsx]

## Sheet: Sheet1
Samples	status	time(days)	age(days)
TCGA.06.0125.01	0	1448	23343
TCGA.06.0190.01	0	317	22835
TCGA.06.0210.01	0	225	26600
TCGA.06.0650.01	0	717	14560
TCGA.06.1804.01	0	414	29802
TCGA.06.1806.01	0	466	17296
TCGA.06.5415.01	1	260	22213
TCGA.06.5417.01	1	155	16572
TCGA.06.5418.01	0	83	27584
TCGA.06.5856.01	0	114	21232
TCGA.06.5859.01	1	139	23211
TCGA.06.6388.01	0	159	23519
TCGA.06.6389.01	1	237	18248
TCGA.06.6391.01	0	45	16206
TCGA.06.6700.01	1	145	27850
TCGA.06.6701.01	1	151	22051
TCGA.06.A5U0.01	1	143	7958
TCGA.06.A5U1.01	0	57	28545
TCGA.06.A6S0.01	0	95	29037
TCGA.06.A7TK.01	1	164	23674
TCGA.12.5301.01	0	62	21768
TCGA.14.0736.01	0	460	18219
TCGA.14.0781.01	0	29	17903
TCGA.14.1043.01	0	24	22392
TCGA.14.1395.01	0	42	19237
TCGA.14.1450.01	1	1788	20960
TCGA.19.5950.01	1	343	19244
TCGA.19.5951.01	0	244	27995
TCGA.19.5954.01	1	242	26355
TCGA.19.5955.01	0	54	30550
TCGA.19.5956.01	1	198	19591
TCGA.19.5958.01	1	164	20466
TCGA.19.5960.01	1	165	20641
TCGA.26.5134.01	1	167	27111
TCGA.26.5136.01	1	37	28496
TCGA.26.5139.01	1	48	23782
TCGA.26.6173.01	1	241	21093
TCGA.26.6174.01	1	71	23884
TCGA.26.A7UX.01	1	260	17365
TCGA.28.5204.01	0	454	26490
TCGA.28.5208.01	1	474	19053
TCGA.28.5211.01	1	358	15507
TCGA.28.5213.01	1	298	26491
TCGA.28.5214.01	1	432	19520
TCGA.28.5218.01	0	157	23096
TCGA.28.6450.01	0	165	22177
TCGA.32.1979.01	0	593	25252
TCGA.32.5222.01	1	165	24134
TCGA.4W.AA9R.01	1	124	22317
TCGA.4W.AA9T.01	1	449	19801
TCGA.74.6573.01	0	105	24632
TCGA.74.6575.01	1	534	26827
TCGA.74.6581.01	1	250	28263
TCGA.76.4925.01	0	146	28011
TCGA.76.4928.01	0	94	31267
TCGA.76.4929.01	0	111	27831
TCGA.76.4931.01	0	279	25812
TCGA.76.4934.01	0	77	24319
TCGA.76.4935.01	1	328	19231
TCGA.76.6193.01	0	82	28742
TCGA.76.6285.01	0	254	23674
TCGA.76.6286.01	0	638	22173
TCGA.76.6656.01	0	147	24265
TCGA.76.6660.01	0	114	26913
TCGA.76.6663.01	1	235	16126
TCGA.76.6664.01	1	237	18054
TCGA.81.5910.01	0	49	23567
TCGA.81.5911.01	1	539	12292
TCGA.OX.A56R.01	0	180	25178
