# Supplementary material for: Integrative analysis of DNA methylation and gene expression to identify key epigenetic genes in glioblastoma
Source: Aging (Albany NY). 2019 Aug 8;11(15):5579–92. doi: 10.18632/aging.102139 (PMC6710056; doi:10.18632/aging.102139)
Supplement: Supplementary Table 2 [file aging-11-102139-s001.xlsx]

## Sheet: Sheet1
Samples	status	time(days)	age(days)
TCGA.06.0152.01	0	375	24844
TCGA.06.0171.01	0	399	24085
TCGA.06.0211.01	0	360	17515
TCGA.06.0221.01	0	603	11333
TCGA.06.5408.01	0	357	20063
TCGA.06.5410.01	0	108	26395
TCGA.06.5411.01	0	254	18832
TCGA.06.5412.01	0	138	28762
TCGA.06.5413.01	1	268	24477
TCGA.06.5414.01	1	273	22527
TCGA.06.5416.01	1	204	8533
TCGA.06.5858.01	1	187	16662
TCGA.06.6390.01	0	164	21328
TCGA.06.6693.01	0	3667	23585
TCGA.06.6694.01	0	224	27909
TCGA.06.6695.01	1	253	23426
TCGA.06.6697.01	1	391	23763
TCGA.06.6698.01	1	145	19591
TCGA.06.6699.01	1	47	21190
TCGA.06.A6S1.01	0	78	19443
TCGA.06.A7TL.01	1	165	11297
TCGA.12.5295.01	0	454	22161
TCGA.12.5299.01	0	98	20463
TCGA.14.0740.01	0	364	25627
TCGA.14.0862.01	0	88	22179
TCGA.14.1402.01	0	975	21421
TCGA.15.1444.01	0	1537	7827
TCGA.19.0957.01	0	666	17714
TCGA.19.1389.01	0	141	18659
TCGA.19.4065.01	1	214	13257
TCGA.19.5947.01	0	202	17218
TCGA.19.5952.01	0	575	22841
TCGA.19.5953.01	0	144	21204
TCGA.19.5959.01	1	161	28449
TCGA.19.A60I.01	1	206	14437
TCGA.19.A6J4.01	0	121	25058
TCGA.19.A6J5.01	1	504	14970
TCGA.26.1442.01	1	953	15950
TCGA.26.5132.01	1	286	27196
TCGA.26.5133.01	1	452	21560
TCGA.26.5135.01	0	270	26490
TCGA.28.5207.01	0	343	25975
TCGA.28.5209.01	1	77	24362
TCGA.28.5215.01	0	335	22686
TCGA.28.5216.01	1	415	19239
TCGA.28.5219.01	1	259	17254
TCGA.28.5220.01	1	319	24622
TCGA.32.1980.01	0	36	26467
TCGA.41.5651.01	1	351	21698
TCGA.41.6646.01	1	236	26667
TCGA.4W.AA9S.01	1	44	25545
TCGA.74.6577.01	1	132	18740
TCGA.74.6578.01	1	436	21464
TCGA.74.6584.01	1	228	20232
TCGA.76.4926.01	0	138	25085
TCGA.76.4927.01	0	535	21193
TCGA.76.4932.01	0	1458	18433
TCGA.76.6191.01	0	508	20937
TCGA.76.6192.01	0	100	27322
TCGA.76.6280.01	0	346	20931
TCGA.76.6282.01	0	519	23323
TCGA.76.6283.01	0	165	26002
TCGA.76.6657.01	0	153	27341
TCGA.76.6661.01	1	7	19965
TCGA.76.6662.01	1	282	21511
TCGA.87.5896.01	1	2	18391
TCGA.RR.A6KA.01	0	191	26582
TCGA.RR.A6KB.01	1	0	18713
TCGA.RR.A6KC.01	0	625	20302
