# Supplementary material for: Integrative analysis of DNA methylation and gene expression to identify key epigenetic genes in glioblastoma
Source: Aging (Albany NY). 2019 Aug 8;11(15):5579–92. doi: 10.18632/aging.102139 (PMC6710056; doi:10.18632/aging.102139)
Supplement: Supplementary Table 3 [file aging-11-102139-s007.xlsx]

## Sheet: Sheet1
Gene Symbol	p-value	FDR
ARHGEF10L	0.00118711	0.00653385
RNF10	0.00027517	0.00241008
FGFR1OP2	0.00119924	0.00657418
ASS1	0.00108883	0.00619174
NCBP2	0.000367773	0.00296913
DISC1	2.18839e-05	0.00034644
RPL37	0.00154653	0.00778381
SPR	2.39511e-05	0.000371107
HMGCLL1	0.000760046	0.00487617
GRIN1	0.000353941	0.00288693
RBMY1A3P	NA	NA
DHX8	0.000825747	0.00513403
LRRTM2	0.00206907	0.00949864
NUP93	0.00177671	0.00857851
CAMKV	0.000914645	0.00550181
GOLIM4	0.00053832	0.00384808
RAB40B	0.00032947	0.0027563
GTSE1	1.75814e-05	0.000288065
FAM183A	0.000300167	0.00256447
SPPL2A	9.57064e-05	0.00112599
ATP2A3	1.29261e-06	2.92905e-05
ITGA7	4.15538e-05	0.000583116
DENND4B	0.00034871	0.00285921
DENND4C	0.000165837	0.00168713
SDK2	0.00176675	0.00854853
CHST9	9.37072e-11	3.88401e-09
CHST8	0.0003296	0.0027563
COL4A4	7.52742e-08	2.19514e-06
SNORD115-17	NA	NA
NOG	0.000488547	0.00360917
LRPAP1	3.33475e-05	0.000488314
SMAD1	0.000376357	0.00302293
AMMECR1L	0.0011464	0.00637544
TMPRSS11B	1.217e-10	4.96719e-09
TMPRSS11D	7.85942e-30	1.02123e-27
RAD21L1	3.16819e-47	8.7896e-45
HRH3	0.00021074	0.00200003
ART3	6.29229e-07	1.53786e-05
ART4	6.09777e-54	2.23549e-51
BFAR	0.000267574	0.00237087
LEO1	0.00153944	0.00776336
ATP1A3	0.00107702	0.00614199
MGRN1	0.000911312	0.00548497
TCP1	0.000657967	0.00441008
BPESC1	4.10395e-12	1.88067e-10
CBLB	8.44666e-06	0.000153596
CPEB1	0.000106575	0.00121487
CPEB2	0.00062968	0.0042735
BEGAIN	0.00119746	0.00656622
RBMXL3	7.77501e-18	5.3207e-16
TLN2	0.000660537	0.00442121
IFT80	0.00112906	0.00631473
POU5F1B	1.16637e-05	0.000202756
SLC27A4	3.21572e-07	8.35681e-06
PNOC	0.00143023	0.00739243
MCM10	5.8928e-06	0.000112854
PDIA5	1.17255e-05	0.000203658
ATG4A	0.00085085	0.00524563
PHOX2B	1.88733e-20	1.53757e-18
SNORD114-31	NA	NA
SNORD114-30	NA	NA
MPHOSPH8	0.000329602	0.0027563
SNORD115-6	NA	NA
RNF128	0.000669621	0.00446341
SIX6	1.54518e-56	6.34452e-54
MR1	0.000814048	0.00510147
MGC4473	8.27904e-25	8.76127e-23
SNORD115-4	NA	NA
KNDC1	0.00156058	0.00782769
ZFP82	0.00143312	0.00739804
RTBDN	0.000335306	0.00279037
EFHA2	0.00149963	0.00762654
RFX4	0.00019646	0.00190881
RFX7	6.68925e-05	0.000851925
NRXN3	0.000318473	0.00268305
SNORD104	NA	NA
NLRP13	7.01221e-09	2.36389e-07
XPNPEP2	0.00203299	0.00939534
TMEM218	0.00183587	0.00874891
STXBP6	3.05125e-07	7.94952e-06
RUNDC2C	7.90848e-06	0.000145225
STAC2	0.00181833	0.00870117
GPR78	0.00137465	0.00720673
VPS37B	0.000770168	0.0049089
DPYSL3	3.80701e-06	7.70788e-05
KRTAP10-12	0.000337217	0.00279607
KRTAP10-11	0.00181794	0.00870117
IGFBP2	0.00219076	0.00984377
IGFBP7	0.000225641	0.00209706
CKLF	0.00209152	0.00957391
GJA8	8.09504e-18	5.5213e-16
STMN1	8.37562e-05	0.00101099
KDM3B	0.000185079	0.00182853
KDM3A	0.000534847	0.00383214
EIF2B3	3.01034e-06	6.28891e-05
C20orf56	5.07897e-22	4.47516e-20
TXNIP	0.000285419	0.00247452
IFI16	0.0020283	0.00938581
SOX6	0.00086501	0.00530585
LOC440944	0.000808861	0.00508293
TTC1	0.00029277	0.00252121
MYT1L	0.000979619	0.00577421
C9orf125	0.000284721	0.0024697
CFHR2	0.00109193	0.00619346
KRTAP2-1	0.000582972	0.00404749
KRTAP2-4	NA	NA
RIT1	0.00010247	0.00118054
PCDHA6	0.000307855	0.00261276
HAS2	0.00113467	0.00633817
HLA-DPA1	0.00168315	0.00826378
ZNF559	0.000288845	0.00249683
PHLDA1	6.28302e-07	1.53786e-05
PCP4L1	0.0010195	0.00592259
C11orf17	0.00086311	0.00530052
SNORD115-9	NA	NA
ZCCHC13	0.00139088	0.00726896
CDC5L	0.000764618	0.00489882
RCL1	0.000598665	0.00412436
CPLX3	9.45421e-07	2.22842e-05
AP2A1	0.000352904	0.00288234
CPLX4	2.734e-37	5.50285e-35
LILRB3	0.00183467	0.00874705
PRAMEF4	1.3562e-07	3.77786e-06
PRAMEF6	2.90079e-05	0.000436608
TUBG2	0.000255476	0.00230041
PRAMEF1	0.000153256	0.00159241
PRAMEF2	4.32062e-06	8.562e-05
OR7G1	0.0010574	0.00606721
PRDM9	2.91137e-06	6.11149e-05
PAMR1	0.00150643	0.00764717
ERGIC3	2.82364e-05	0.000426302
ERGIC1	0.00156325	0.00783535
B3GAT1	0.00215385	0.00975479
CALM2	0.000112701	0.0012699
GSDMD	0.000148107	0.0015577
DLGAP2	0.00192144	0.00903531
DLGAP5	6.04355e-13	2.91939e-11
CLCN6	0.000436235	0.00333819
CLCN4	2.17625e-05	0.000345274
BRD8	0.000529133	0.00381018
DNAJA3	0.00138646	0.00725617
DNAJA4	0.000364705	0.00295286
LOC643387	0.000612306	0.00419371
PTPN12	0.000133619	0.00144458
LOC100192379	0.00146273	0.00750372
MYCBP	0.00102714	0.00594508
C8orf30A	0.000681816	0.00451922
C16orf78	6.11862e-06	0.000116526
C2orf82	0.000952162	0.00565407
ZSCAN2	0.000481816	0.00358155
HOXA6	1.12776e-61	5.93664e-59
HOXA5	1.47065e-85	1.67736e-82
SNORD38A	NA	NA
HOXA4	1.01965e-08	3.38727e-07
HOXA3	7.70153e-09	2.58776e-07
HOXA2	1.32383e-66	8.76714e-64
CISD2	5.23025e-05	0.00069635
CLNS1A	0.000395449	0.00312613
HOXA1	1.34609e-06	3.0335e-05
R3HDML	4.94801e-09	1.68462e-07
PABPC1P2	4.47344e-54	1.70074e-51
ZNF581	0.000426664	0.00328807
LPAR6	7.72528e-05	0.000954846
P2RX2	0.00166499	0.00820504
HOXA9	5.50011e-07	1.37036e-05
OR8U1	0.000893202	0.00540994
LPAR5	0.00182	0.00870156
ZP2	2.56122e-06	5.44889e-05
OR52N5	0.000161954	0.00165642
NDC80	7.85818e-05	0.000967651
OR52N1	3.98193e-06	7.9833e-05
SULT6B1	6.95321e-17	4.43321e-15
HOXA13	4.4612e-05	0.000612631
HOXA11	3.58381e-101	5.65966e-98
HOXA10	1.20344e-14	6.51888e-13
KRTAP19-2	NA	NA
PPIAL4C	0.00086737	0.0053128
KRTAP19-8	9.56541e-06	0.000171061
GALNTL5	2.962e-05	0.000443868
GALNTL6	0.00215785	0.0097583
SNORD114-3	NA	NA
SRI	1.14532e-06	2.63603e-05
SRR	1.76851e-08	5.69085e-07
LGALS1	0.0013004	0.00692926
EIF2AK1	0.000409856	0.00319939
ERCC6L	4.62382e-09	1.58212e-07
NMB	0.000688466	0.00453456
AVPI1	0.00167047	0.00822361
FAM136B	1.34075e-39	3.02478e-37
ASAP3	0.000580701	0.00403855
VSIG10L	0.00076843	0.00490682
KRT28	2.97788e-07	7.77811e-06
TBX2	0.000272334	0.00239556
LRRC24	0.0006844	0.00452665
LOX	0.00027684	0.00241955
LPGAT1	0.00030879	0.00261961
PRKX	0.000458297	0.00345373
C14orf138	0.00208368	0.00954449
GCNT2	0.000440438	0.00336266
C14orf135	0.000190702	0.001867
LOC440957	0.00130046	0.00692926
LPCAT3	0.00122947	0.00667577
CALCRL	3.72745e-06	7.56918e-05
C20orf185	1.524e-06	3.37517e-05
PIGW	0.0012347	0.00669354
NDFIP2	4.97178e-05	0.000667128
ALPP	2.10536e-26	2.41469e-24
INPPL1	5.42143e-06	0.000104804
SRRM4	0.00190392	0.00898593
SEC61A1	0.000259494	0.00231929
SEC61A2	1.07676e-06	2.51204e-05
PECR	0.00113462	0.00633817
DDHD2	0.000517917	0.00375719
MGST3	0.000769125	0.00490682
SV2B	8.36653e-05	0.00101099
TMEM82	1.76015e-13	8.80479e-12
PECI	0.000814515	0.00510284
OR11G2	7.7859e-05	0.000960605
PLVAP	0.00060698	0.00416632
SCN2B	0.000381122	0.00305284
ARHGAP25	0.000208327	0.0019865
NFKBIL2	0.00207998	0.00953168
PCGF1	0.00158789	0.0079317
SYDE1	9.10632e-05	0.00108128
PCGF2	0.00131415	0.00698228
SMAD2	0.00149954	0.00762654
ATG2B	0.000621597	0.00423967
PPPDE1	4.05681e-07	1.03461e-05
BMP2	0.0007864	0.00498387
BMP1	0.000883566	0.00538427
ASF1B	3.24632e-05	0.000477339
GOLGA8E	5.51547e-08	1.65538e-06
NDUFAF1	0.000150183	0.00157069
2019-03-11	0.00172094	0.00839013
CT45A4	5.881e-47	1.58864e-44
CT45A6	1.46487e-22	1.33661e-20
HBII-52-27	NA	NA
RSAD1	0.000964398	0.00571072
CHD5	0.000395984	0.00312916
CHD9	0.000812566	0.00509955
SNORD11	NA	NA
PRKCB	0.000886799	0.00538957
C3orf50	0.0018485	0.00879543
DYNC1LI1	0.00204712	0.00942953
TRPC1	0.00152296	0.00770088
EFHC1	0.000258467	0.00231475
TPRKB	0.000104249	0.00119566
ETHE1	0.000145157	0.00152981
ABCG2	0.00150271	0.00763576
ABCG5	0.0010614	0.00608164
HNF4G	0.000606946	0.00416632
PRKCZ	3.89639e-06	7.83475e-05
SPC25	0.000162927	0.00166412
MS4A6E	6.50307e-11	2.75274e-09
SRBD1	0.00047632	0.00355336
SGSM1	0.000787747	0.00498841
ASPHD1	6.58859e-06	0.000123641
FCER1G	0.00165058	0.00815232
BTG3	0.00148403	0.00757138
AKR1B15	4.68656e-64	2.749e-61
SLA2	0.00122594	0.00667245
C4orf35	1.58878e-08	5.15285e-07
HELLS	0.000129207	0.00140947
FAM49B	7.16703e-11	3.02134e-09
PDILT	5.15186e-11	2.19891e-09
SNORD12	NA	NA
C10orf99	3.94089e-18	2.80925e-16
C10orf96	1.3389e-09	4.78044e-08
ADH7	8.29419e-54	2.98736e-51
ADH6	2.82129e-65	1.75518e-62
ADH5	0.000734554	0.00475591
C4orf6	8.18324e-05	0.000995272
C4orf7	1.5188e-07	4.19664e-06
PRKACB	2.51851e-05	0.000388175
C20orf79	0.000525094	0.0037921
HDHD3	0.000336123	0.00279328
LOH3CR2A	5.97944e-10	2.21985e-08
RMI1	0.000490182	0.00361604
SNORD21	NA	NA
SNORD20	NA	NA
KLHDC5	0.00115127	0.00639662
SNORD25	NA	NA
KCNK9	0.00123125	0.00668189
SFRS9	0.000274722	0.00240719
SULT2A1	8.80838e-06	0.000159327
BEX5	0.00035811	0.00291284
BEX4	2.51594e-05	0.000388071
BEX2	0.000568777	0.0039935
NUP160	0.000770742	0.00491103
CRYM	0.000325524	0.00273111
ME2	0.00175844	0.00852315
FOXN1	1.89388e-14	1.01784e-12
GRIN2C	2.05548e-06	4.4376e-05
GNA14	0.000607394	0.00416632
GNA12	0.00180195	0.0086521
GNA13	0.000805974	0.0050741
PRKAR1A	0.000121239	0.00134543
MFGE8	0.000200518	0.00193724
SBF1	0.000235416	0.00216343
SBF2	0.000144673	0.00152706
TPPP	0.000108316	0.00123122
SNORD127	NA	NA
OGDH	0.000722073	0.00469774
C11orf36	4.1176e-15	2.32237e-13
SEMG1	3.40959e-10	1.31577e-08
LOC100134713	0.000238857	0.00218917
RPL13AP20	0.00151977	0.00769065
DAZ3	1.5596e-06	3.45028e-05
DAZ2	3.04713e-06	6.34459e-05
TAS2R19	0.00164613	0.00813947
SRFBP1	0.000144111	0.0015227
BCAT1	1.41937e-05	0.000240834
LOC283267	4.22991e-07	1.07078e-05
AKAP6	0.000132355	0.00143466
ORC1L	2.78399e-06	5.87413e-05
PIPOX	3.15497e-05	0.00046699
EIF2A	0.000417177	0.00323683
CYP26A1	4.00383e-05	0.000566106
PSTK	0.000225147	0.00209436
SNORD124	NA	NA
RLF	0.00211609	0.00964337
NOVA1	0.000880723	0.00537013
LOC255167	0.000240308	0.0022005
TMEM132E	0.00167014	0.00822361
FAM64A	1.30576e-08	4.26868e-07
TTTY17A	NA	NA
CETN1	3.66066e-07	9.41772e-06
SNORD115-5	NA	NA
CCL25	0.00202512	0.00938078
CCL24	4.59382e-13	2.22958e-11
C8orf48	0.00174301	0.0084796
C8orf46	0.000820441	0.00512313
C8orf45	0.000150164	0.00157069
C8orf41	0.000685466	0.00452787
CDC45	3.07754e-05	0.000458504
SNORA14A	4.91848e-05	0.00066214
SNORD80	NA	NA
BRF2	0.00104222	0.00601303
UBE2L6	0.00035871	0.0029154
DNAJC6	2.69389e-07	7.07231e-06
RRP15	0.000943894	0.00562011
TMEM179	0.000367923	0.00296913
TRIM49	1.28417e-13	6.50965e-12
ZNF831	0.00108194	0.0061632
TRIM46	0.00209707	0.0095886
SNORA68	8.47314e-20	6.58915e-18
SNORA65	9.62126e-42	2.2704e-39
SNORA61	3.51973e-46	9.38441e-44
ZNF410	0.00140753	0.00731744
ATOH7	0.00188802	0.00892906
ATOH1	5.32857e-28	6.67045e-26
LIMD1	4.69861e-06	9.22204e-05
RNF151	4.45519e-82	4.35548e-79
ATOH8	0.000647345	0.00435896
MARVELD3	0.000930958	0.00556893
MECP2	0.00110685	0.0062328
IFITM4P	3.1028e-47	8.72609e-45
RARRES2	2.19035e-05	0.00034644
TSPY3	0.000879113	0.00536423
TSPY1	1.11643e-09	4.00704e-08
TRPV6	4.45692e-06	8.78967e-05
SLC17A7	3.69785e-05	0.000532004
SLC17A1	2.08998e-13	1.04144e-11
SLC17A2	1.1198e-06	2.58308e-05
SLC17A3	1.05398e-36	2.04135e-34
C16orf52	0.000734567	0.00475591
MYF5	0.000170863	0.0017243
ZNF207	0.000255968	0.0023018
SLC37A2	0.000193633	0.00188725
GFI1B	0.00205741	0.00945591
MYOD1	3.84687e-06	7.76813e-05
CDK13	0.00148181	0.00756189
CDK17	1.19547e-05	0.000206418
ATP6V1B1	7.94474e-05	0.000974842
AASDH	7.83143e-05	0.000965641
GPR128	3.90658e-33	6.26579e-31
SNORD56B	NA	NA
KCNAB1	0.000490404	0.00361638
BFSP1	0.00124451	0.00672538
P2RY8	0.00143068	0.00739287
MMP27	6.28936e-08	1.87403e-06
KCNAB2	0.00121741	0.00664046
MMP20	1.92698e-07	5.21224e-06
RPL15	0.0012798	0.00684049
RND2	3.69746e-06	7.52317e-05
SPATA24	0.00216724	0.00978403
CTNNBIP1	0.00218552	0.00983048
SNORD78	NA	NA
LRRC42	0.000742401	0.00479292
LRRC47	0.000207648	0.0019828
LRRC48	3.69006e-05	0.000531255
PRR21	0.00020626	0.00197413
B3GNT4	8.09632e-05	0.000988112
B3GNT7	0.00022073	0.00206781
ADRA2C	0.000535417	0.00383401
GUK1	7.75193e-05	0.000956988
CCDC155	1.28224e-33	2.12293e-31
LRRC4B	0.000351336	0.00287473
SYT1	0.000339973	0.00281324
OR6T1	2.28814e-08	7.23815e-07
SYT4	0.000313624	0.00265076
SYT5	0.000190618	0.001867
SYT7	0.000687873	0.0045321
SYK	5.49299e-05	0.00072615
SNORD113-7	NA	NA
SPZ1	2.02898e-05	0.000325928
FLJ16779	5.23974e-05	0.000697161
FAM189A1	0.000574248	0.00401587
TRIM5	0.000154923	0.0016015
NES	0.00059595	0.00410979
SNORD96A	NA	NA
TRIM4	1.67712e-13	8.41839e-12
LOC100130274	0.000448447	0.00340734
PALM2	5.44505e-05	0.000721672
C1orf53	3.24814e-05	0.000477339
C1orf52	0.00134932	0.00710663
C1orf59	0.000142521	0.00151231
LOC151300	0.000297115	0.0025485
ICMT	0.000938757	0.00560151
TBK1	0.000981541	0.00577895
MPZL1	4.30915e-05	0.000599157
ATP6V0A4	2.34045e-06	5.02085e-05
ATP6V0A1	0.000435896	0.00333791
SLC22A15	0.00185258	0.00880607
GUCA1A	0.00177788	0.00858213
C17orf104	0.00207954	0.00953168
C17orf103	0.000816921	0.00511478
SASH3	0.000521521	0.00377473
TTC28	0.00106914	0.00610555
LOC402644	2.42826e-11	1.06295e-09
TRAM2	0.0017014	0.00831463
PER4	5.80511e-12	2.63088e-10
TAOK2	4.66053e-11	2.00169e-09
ACOX2	3.96448e-07	1.01232e-05
PTK7	0.000456786	0.00344899
SNORD119	NA	NA
CELF4	0.000377847	0.00302897
GAL3ST4	0.000350537	0.00286943
IL17RD	1.28962e-05	0.000221185
ATG16L1	0.00012217	0.00135341
C4orf51	2.93636e-08	9.18956e-07
C4orf52	9.16899e-05	0.00108746
C3orf30	2.55594e-10	1.00331e-08
ARHGDIB	0.00010627	0.00121341
C3orf38	0.000437472	0.00334623
PCGEM1	0.000406069	0.00318677
WNT9A	0.000480664	0.00357667
C12orf12	0.000287733	0.00248869
PDSS2	0.000284192	0.00246805
C15orf62	7.12822e-05	0.000894514
EBF2	0.00199148	0.00926889
EBF1	0.00045781	0.00345343
CES8	2.0683e-07	5.56516e-06
ENDOU	6.39755e-05	0.000822943
BDH1	0.00105042	0.00604242
DDX23	0.00221861	0.00993827
DDX24	0.00155978	0.00782557
ERBB2	5.44277e-05	0.000721672
ZNF92	0.00139561	0.0072776
ZNF578	1.08642e-05	0.000191125
PI4KAP1	0.000161309	0.00165088
FLVCR2	0.00060403	0.00415435
FKBP10	2.48441e-11	1.08291e-09
C20orf11	5.15794e-05	0.00068806
PDPN	0.000819081	0.00512207
GGPS1	1.1032e-05	0.000193745
HBII-52-46	NA	NA
HBII-52-45	NA	NA
WSCD2	0.00177587	0.00857849
FAM153C	0.00023404	0.00215561
SNORD47	NA	NA
MARCKS	3.3455e-05	0.000489196
CCDC72	0.00214816	0.00974125
CCDC71	0.000587701	0.00406768
PRAC	4.53655e-05	0.00061985
SNORD4B	NA	NA
SNORD4A	NA	NA
SMPDL3B	0.000566846	0.00398539
LOC650293	5.71789e-10	2.13046e-08
OSGIN2	0.000142912	0.00151397
STOML1	0.000638672	0.00432024
NT5E	0.000203459	0.0019592
NKAIN4	7.86581e-05	0.000967651
NKAIN2	0.000350376	0.00286926
LOC284788	1.11161e-06	2.56707e-05
MAP1A	0.000626136	0.00425537
LBX2	0.000581436	0.00404092
UNC5C	0.00171085	0.00835086
VGF	0.00120755	0.0066039
LBX1	2.96101e-32	4.50293e-30
CCM2	0.000191538	0.0018734
MAP1S	0.000748734	0.00482321
SNRPF	6.05394e-05	0.000786132
DSCR4	0.00201167	0.00933748
ZNF433	0.00147198	0.00753265
SIX5	1.84534e-06	4.01748e-05
RPS12	0.00102492	0.00593556
SAGE1	1.90511e-63	1.08644e-60
RPL18A	0.000292317	0.00251836
SIX1	0.000235329	0.00216343
OR2F1	5.47505e-10	2.05115e-08
KRT4	2.82385e-11	1.2205e-09
CEND1	0.00167304	0.00823091
CRYGC	8.05913e-07	1.91942e-05
DACT3	0.000501308	0.00367435
SPRR2F	3.35738e-09	1.15878e-07
PP14571	6.38628e-06	0.000120529
TAS2R38	4.60544e-08	1.3937e-06
EPB41L1	0.000406742	0.00319032
EPB41L3	2.99465e-10	1.16661e-08
EPB41L5	2.79995e-05	0.000424229
FLJ43860	1.76543e-30	2.41628e-28
FAM72D	0.000150694	0.00157442
FAM72B	0.000204785	0.00196801
FAM72A	1.82724e-06	3.9823e-05
OR5C1	5.932e-21	5.01169e-19
DCAF13	0.00150085	0.00763061
DFNA5	0.000932824	0.00557624
WNT2	0.00161143	0.0080181
AGXT	5.32099e-26	6.00219e-24
LRRN1	0.000458423	0.00345373
TREML3	0.000116429	0.00130332
CNTNAP2	0.000268346	0.00237566
BLMH	0.00105043	0.00604242
SNORA46	3.0778e-11	1.32746e-09
SNORA42	1.30993e-07	3.66387e-06
SNORA40	0.000659255	0.00441726
MRPL34	0.000553273	0.00392348
SNORD116-24	NA	NA
SNORD116-25	NA	NA
FLJ46321	0.000186375	0.00183691
SNORD116-23	NA	NA
SNORD116-29	NA	NA
ZNF814	0.00170066	0.00831463
KLF11	0.00050954	0.00371584
TFAP2A	0.00173046	0.00842854
TFAP2B	4.95043e-59	2.16239e-56
KRTDAP	3.3988e-07	8.79917e-06
C4orf14	0.000177472	0.00177041
GBE1	0.000674419	0.00448666
C4orf17	2.4116e-23	2.32442e-21
EIF3E	8.10031e-05	0.000988112
MSI1	0.000207816	0.00198348
MCCC2	0.000125934	0.00138363
MRPL39	4.41228e-05	0.000609174
LOC92659	0.00184905	0.00879543
RPA1	0.00149694	0.00761888
ANKFN1	0.000127672	0.00139569
CXorf40A	0.000824844	0.00513218
COQ9	0.00155139	0.00779489
COQ2	2.61435e-06	5.54469e-05
ZRANB1	0.000305042	0.0025939
ATP9A	0.00101446	0.005905
BOC	0.000789716	0.00499626
TPX2	0.000528683	0.00380926
DENND2A	0.000654208	0.00439348
GAGE4	5.18744e-06	0.000101042
LOC145474	1.34447e-51	4.31281e-49
PHC1	0.00013769	0.00147151
GRXCR2	0.00200571	0.00931822
H2AFV	0.000213793	0.00201987
OR2A25	4.42813e-17	2.87688e-15
H2AFY	0.000293709	0.00252824
TMCO2	1.29358e-35	2.35019e-33
RNF7	6.44456e-05	0.000826918
APP	0.000734815	0.00475591
NCAPG2	0.000933301	0.00557645
SNORA71D	1.58454e-12	7.44409e-11
KC6	1.34057e-10	5.4284e-09
RRAGA	0.000481844	0.00358155
LRRC61	0.000208734	0.00198946
C7orf36	9.55928e-05	0.0011253
DEFB121	NA	NA
PRSS3	0.00117055	0.00647223
ISCA2	2.31666e-05	0.000362508
FAM118B	1.87589e-07	5.10094e-06
LMX1A	1.30735e-68	9.94072e-66
OR6V1	2.82899e-09	9.86065e-08
RECQL	2.48589e-06	5.29962e-05
MAP7D3	7.15005e-05	0.000896657
ACTR8	0.000769858	0.00490844
BAIAP3	0.000366873	0.0029664
VAX2	0.00021543	0.00203066
RECQL4	6.18881e-06	0.000117645
WBSCR28	6.53135e-31	9.18415e-29
SPINK13	1.92885e-24	1.97012e-22
GBX2	0.000711165	0.00464383
SNORD115-8	NA	NA
TTF1	0.000837702	0.00518794
ALDH18A1	0.00187553	0.0088884
ACTN2	0.00031696	0.00267565
RABEP1	9.51315e-06	0.000170572
PTPRU	3.37338e-32	5.05514e-30
SAA2	0.00188108	0.00890239
ANKS1B	1.92591e-05	0.000310626
PTPRR	0.000204949	0.00196801
ACTRT2	1.18291e-05	0.000204938
NKX3-2	1.80039e-05	0.000292885
ZIM3	7.71939e-08	2.24157e-06
RPL12	0.0010918	0.00619346
SPRR1B	1.08504e-13	5.54128e-12
NDUFA7	0.00157222	0.00786686
ADAM11	0.000418325	0.00324084
ADAM17	7.2203e-26	8.05613e-24
ADAM18	4.68458e-06	9.2121e-05
CPNE9	0.00213114	0.00968924
PTPRF	0.000858186	0.0052766
CPNE3	5.42059e-05	0.000719359
CPNE7	0.000176425	0.00176324
CPNE6	1.3807e-05	0.000234844
SGCZ	0.000399754	0.0031553
GDEP	1.07665e-08	3.55365e-07
GLYAT	1.92688e-51	6.08599e-49
OPALIN	0.00137195	0.00719626
ZNF121	0.00133869	0.00705784
XRN2	3.22695e-05	0.000475246
DNMT3L	1.16092e-17	7.81435e-16
RABEPK	0.00112465	0.00629818
LOC729609	9.28328e-16	5.41437e-14
SNRPB	0.000106379	0.00121382
SNRPC	0.00179149	0.00861747
OR2B2	2.03608e-10	8.13245e-09
SNRPE	8.35699e-06	0.000152641
PTPRK	0.00081306	0.00509955
PTPRJ	3.48059e-06	7.13139e-05
UCP2	0.000698269	0.00458295
ZFR2	0.00133759	0.00705569
ZDHHC14	0.0016444	0.00813482
PCSK2	0.00161861	0.00804602
HIPK4	0.000402783	0.00316997
RPS3	0.000197039	0.00191246
DUSP21	7.21969e-08	2.12046e-06
DUSP22	0.00217669	0.00980644
DUSP26	0.000273035	0.00239958
DUSP27	0.00125172	0.00674547
GPATCH2	0.000848483	0.00523418
NAPA	0.000788349	0.00498915
C3orf14	0.000868441	0.00531735
LARP1	0.00106813	0.00610555
LARP7	0.00105559	0.00606358
TRYX3	0.00174982	0.00850538
RPSAP9	0.000289506	0.0025015
PTER	0.000258887	0.00231689
PLTP	0.000298367	0.00255334
ATMIN	0.00103886	0.00599603
ELAVL2	0.00139805	0.00728474
ELAVL3	0.000728201	0.0047325
SNORD66	NA	NA
HBII-52-28	NA	NA
MFNG	6.33222e-06	0.000119816
EDNRA	0.000895105	0.005412
EDNRB	5.65147e-05	0.000742796
SNORD69	NA	NA
SNORD68	NA	NA
APOB	0.000451883	0.00342377
FAM104A	0.000682175	0.00451922
EN1	3.97167e-05	0.00056311
CCDC50	1.48616e-06	3.30204e-05
CCDC52	0.000110446	0.0012486
CCDC58	0.00163784	0.00811444
CCDC59	0.00102208	0.00592914
SNORD38B	NA	NA
TAS2R60	7.85414e-21	6.60842e-19
GPHN	0.00192384	0.00904015
PAXIP1	4.3766e-07	1.10519e-05
WFDC6	0.000137322	0.00147064
ZMIZ2	0.00114217	0.00636213
RAD18	0.0020311	0.00938943
PREPL	0.00182867	0.00872678
SULT4A1	0.000124545	0.00137321
CABP2	0.000246086	0.00223349
CABP1	0.00204429	0.00942284
FBXO30	0.000319595	0.00268906
SAT2	0.00218633	0.00983048
LOC282997	1.36816e-05	0.000233292
MBOAT7	0.00155079	0.00779489
LOC642929	7.22185e-06	0.000134176
OR2A2	0.000509111	0.0037143
OR2A5	0.00223838	0.00999653
S100A1	4.19685e-09	1.44324e-07
KIAA0513	0.000996246	0.00583702
STAG3L4	0.000472935	0.00353453
ZNF365	6.58261e-07	1.6031e-05
LOC100134868	0.000567891	0.00399079
C20orf203	0.00152548	0.00770812
SLCO1B3	1.49199e-16	9.28201e-15
SYNJ2BP	0.00010334	0.00118856
PTPRZ1	6.56948e-05	0.000839797
IGDCC4	0.00186039	0.00883296
CCNA1	0.000736009	0.00475945
DYNC1I1	9.06664e-05	0.00107906
RAI1	0.00119475	0.00655988
SKA2	0.000177734	0.00177216
COL28A1	0.00202911	0.00938581
VCAM1	0.00198206	0.00924203
SNORD113-4	NA	NA
ZNF114	5.80381e-05	0.000758448
E2F7	0.00174887	0.00850411
E2F5	8.1134e-05	0.000989122
E2F2	1.4307e-07	3.97459e-06
SNORD116-26	NA	NA
SCAF1	3.43368e-06	7.04934e-05
E2F8	2.77595e-05	0.000421214
PPP4C	0.000135028	0.00145442
ACBD6	0.000135646	0.00145955
EEF2	7.69163e-05	0.000951758
SKA3	3.57187e-10	1.37493e-08
SNORA25	1.17476e-11	5.23164e-10
OLFM1	0.00218911	0.00983853
TYR	8.42208e-17	5.33658e-15
FAM168B	0.00203965	0.00940991
PYCR1	3.38036e-12	1.55953e-10
ST8SIA3	0.00178208	0.00858829
OR5H15	NA	NA
WNT10B	0.000152139	0.00158629
ZNF331	0.000974093	0.00575651
GNG11	0.00162804	0.00808682
GNG12	0.000465953	0.00349124
SYTL4	0.000185479	0.00183159
RPLP1	0.000593925	0.00409996
HPCAL1	0.00126656	0.00679983
HPCAL4	0.00109504	0.00620248
LIPF	4.46854e-12	2.04319e-10
GAGE2E	NA	NA
SEC24A	0.00122114	0.00665269
ACCN2	6.93441e-07	1.68278e-05
ACCN4	0.000334498	0.0027859
KAL1	0.000455273	0.00343883
MRPL49	3.99968e-05	0.000565909
OTOP1	1.45337e-12	6.8435e-11
NEUROG1	8.03331e-11	3.35894e-09
SMC5	0.00048787	0.00360676
C16orf5	0.00138941	0.00726556
ARFGAP2	0.00192531	0.00904327
LAMB2	3.98362e-08	1.21883e-06
COPZ1	0.000114447	0.00128534
NEK1	0.00186865	0.0088599
SNORD115-1	NA	NA
SNORD58A	NA	NA
SNORD58C	NA	NA
OR5B17	5.69324e-05	0.000746851
SGIP1	0.00118297	0.00651809
COX7A1	0.00048888	0.00361032
TMEM14B	3.32507e-05	0.000487598
TMEM8A	0.00129865	0.00692323
MTHFD2	1.42679e-05	0.000241883
PRR20C	NA	NA
PRR20D	NA	NA
ADSS	0.000991341	0.00582306
GMNN	0.000899335	0.00542483
ADSL	0.000214531	0.00202591
AS3MT	0.0020294	0.00938581
C7orf10	5.13878e-05	0.000686396
C7orf13	0.00153769	0.00775837
OR7E24	0.000639472	0.00432423
TGM7	4.39734e-18	3.12379e-16
ZNF575	0.000537342	0.00384377
TMEM63B	0.0015194	0.00769065
LOC646498	2.3763e-07	6.29954e-06
TARS	0.00132585	0.00701721
WFDC8	7.8832e-06	0.00014489
KCNC2	0.000597167	0.0041168
DLL3	2.22765e-08	7.06856e-07
NUDT14	4.67049e-06	9.19322e-05
NUDT18	0.00166263	0.00819743
PHKG1	5.8117e-16	3.47855e-14
ACTL9	7.66977e-05	0.000950847
LOC285627	1.1039e-06	2.55791e-05
CPN1	0.00018041	0.00178929
KIAA0232	7.27015e-05	0.000906231
LGI4	1.48656e-13	7.49855e-12
LGI3	0.00117774	0.00650134
L3MBTL	0.00114243	0.00636213
AURKA	0.000312389	0.00264359
AURKB	3.74764e-07	9.61737e-06
TNNT1	0.000171966	0.00173061
CDC42EP4	0.000491318	0.00362182
HRASLS5	2.056e-05	0.000329248
BMF	5.14378e-11	2.19891e-09
GPRC6A	0.000798065	0.00503667
AHCY	0.00133643	0.00705441
MUC7	7.68701e-14	3.97517e-12
LOC284578	0.00205526	0.00945565
OTP	0.00176982	0.00855933
PTCHD3	1.7622e-30	2.41628e-28
SP100	0.00118635	0.00653185
KRT39	2.50463e-20	2.02441e-18
KRT38	8.864e-08	2.54871e-06
ZBED5	0.000262945	0.00234198
KRT31	0.00177495	0.00857848
SOX14	0.000221866	0.00207229
KRT32	4.56156e-20	3.64393e-18
KRT35	1.04492e-09	3.77014e-08
KRT37	2.2801e-10	9.05425e-09
IL21	0.000919373	0.00552054
IL22	7.84195e-06	0.00014439
ZNF548	0.00192185	0.00903531
SNORD96B	NA	NA
IL12RB2	0.000317185	0.00267645
ATP6AP1	4.88428e-06	9.54992e-05
SNORD63	NA	NA
FLJ35390	1.4669e-05	0.000247253
WLS	3.1985e-05	0.000472411
SNORD116-22	NA	NA
BRCA2	0.00122851	0.00667577
OR4N2	1.7528e-121	5.1407e-118
OR4N4	0.000517394	0.00375472
ACOT7	0.000425097	0.00328215
ADCY5	0.000100066	0.00116446
ADCY3	3.44682e-06	7.06926e-05
KIF24	8.9854e-05	0.00107029
KIF23	0.000437638	0.00334626
RAB42	0.000975139	0.00575935
DDI1	6.22989e-07	1.52807e-05
PDLIM5	2.41711e-05	0.000374232
RNASEH2C	0.000976176	0.00576053
COL4A6	0.000891037	0.00540403
PROL1	0.00116175	0.00644094
ZFP28	0.00164818	0.00814569
XRCC2	8.65788e-05	0.00103743
DCAF12L2	0.000132082	0.00143246
SMURF2	0.00114803	0.00638207
MEIS2	0.00129516	0.00691178
DNAJC25-GNG10	9.70841e-21	8.06938e-19
LOC389493	0.00220571	0.00989579
DDX60	0.00186239	0.00883838
NCRNA00112	NA	NA
AMN1	0.000142424	0.00151231
KIR3DL3	0.000497245	0.00364949
NCRNA00114	1.84408e-08	5.91548e-07
LMNB2	0.000987286	0.00580441
LMNB1	0.000186578	0.00183802
CD276	0.000249045	0.00225251
MRPS23	0.0001034	0.00118858
LOC100144604	0.00051464	0.0037429
PPP2R5B	6.04462e-05	0.00078583
FRMPD2L1	0.00071783	0.00467961
PPCS	0.00170849	0.00834175
MAD2L1	0.000591654	0.00408566
KCNA4	0.000682147	0.00451922
SNORD81	NA	NA
KCNA1	0.000582786	0.00404749
OPTN	0.00088869	0.00539628
SYCE2	0.000149955	0.00157069
FOXD1	9.95904e-05	0.00116227
APPL2	9.7893e-05	0.00114646
PLA2G2E	NA	NA
MEMO1	0.00118329	0.00651811
SLC26A11	0.00200031	0.00930154
KRTAP21-2	1.38842e-06	3.11863e-05
SLC16A8	0.00146234	0.00750358
C20orf196	6.61725e-05	0.000843278
HS3ST6	1.91491e-25	2.08006e-23
HS3ST4	5.54751e-06	0.00010714
CYFIP1	0.00129854	0.00692323
SH2D5	0.00126807	0.00680434
TRIM24	0.000469224	0.00350935
C11orf94	2.67893e-28	3.41605e-26
WDR35	0.00126028	0.00677673
COPG2	0.000116151	0.00130092
PCDHA3	0.00157325	0.00787009
PCDHA7	1.53778e-07	4.23766e-06
EIF4A1	0.0012343	0.00669315
PCDHA8	0.00165401	0.00816642
NPVF	1.93945e-28	2.48855e-26
OR7G3	0.00107978	0.00615433
TMEM89	8.36011e-37	1.6346e-34
LRFN2	0.000217162	0.00204324
NKX2-1	0.00217123	0.00979098
NKX2-5	1.24246e-10	5.06106e-09
NBPF9	0.00163044	0.00809113
TRIM21	0.00050203	0.00367833
IP6K1	0.00135113	0.0071125
PAG1	0.00024587	0.00223251
SPAG11B	6.58733e-05	0.000840509
SNORA2B	0.000171791	0.00172971
MAGED2	0.000842856	0.00520886
C6orf64	4.95862e-06	9.68607e-05
C6orf62	4.18194e-23	3.97478e-21
C18orf10	0.00203329	0.00939534
EXD1	0.00154979	0.00779448
ATP8B4	6.58136e-05	0.000840269
ELP4	0.000272345	0.00239556
DPPA2	7.84185e-06	0.00014439
DPPA3	7.09345e-17	4.50862e-15
DPPA5	3.99501e-10	1.52733e-08
TRIM53	7.73182e-19	5.81444e-17
HTR2C	0.000614069	0.00420228
SPATA12	0.000204897	0.00196801
KLHL35	0.000133341	0.00144322
TAB2	0.000245519	0.0022313
EIF1B	0.00112725	0.00630931
TRIM48	3.68267e-24	3.72439e-22
GBAS	0.000761497	0.00488242
TRIM40	9.55698e-17	6.03707e-15
TBPL2	1.11732e-14	6.06841e-13
EXOC3L	0.000205601	0.00197254
IVL	3.89837e-73	3.20134e-70
NRD1	0.000200061	0.00193465
SCN3B	0.00118235	0.00651809
NECAB1	7.33463e-08	2.15114e-06
TFPT	0.000693444	0.00456149
HIF1AN	0.000879493	0.00536423
GNAI3	0.000143105	0.00151458
GPR143	0.00036858	0.00297093
PCDHB10	0.00181355	0.00869098
SLC7A7	0.0011768	0.00650001
SLC7A4	7.15404e-05	0.000896657
PFDN5	0.000552987	0.00392348
GAGE12J	2.27804e-07	6.07379e-06
DTNB	0.000192795	0.00188032
GAGE12D	0.00149968	0.00762654
GAGE12F	NA	NA
LOC729176	0.00162839	0.00808682
RIN3	6.79008e-05	0.000860763
RIN2	0.000532171	0.00381858
GDA	4.2881e-05	0.000597397
RPS13	0.00030142	0.0025709
RPS11	0.000323533	0.00271662
RPS10	0.000150169	0.00157069
RPS17	0.000152805	0.00159082
LALBA	3.87098e-12	1.77788e-10
RPS18	8.91937e-05	0.00106462
SLC16A4	7.12039e-05	0.000894077
RIPK1	6.01454e-13	2.91223e-11
DDOST	3.86271e-06	7.78993e-05
ODZ3	4.34755e-05	0.000602668
ODZ2	0.00120791	0.0066041
AACSL	0.00064758	0.00435896
SRCIN1	0.000594397	0.00410184
C2orf27A	1.77803e-09	6.27199e-08
C2orf27B	1.95324e-23	1.90952e-21
PLCXD3	0.0018679	0.00885839
LOC643955	1.34181e-05	0.000229371
PRAMEF3	NA	NA
TLR3	0.000527602	0.00380459
POU4F1	0.000341554	0.00281958
HM13	2.47293e-06	5.28846e-05
HAUS8	0.000412073	0.00321179
EZR	0.000686759	0.0045321
PTPRC	1.76568e-05	0.0002889
PTPRN	0.000192699	0.00188028
LOC84740	0.00035943	0.00291779
CYP46A1	0.0021994	0.00987266
DOC2A	0.000417966	0.0032405
OR5J2	7.1908e-06	0.000133842
DOC2B	0.000508737	0.00371289
MUTED	0.00086434	0.00530491
ABLIM2	0.00190681	0.00899132
PRSS38	1.02447e-06	2.4092e-05
LMTK3	0.00183289	0.00874084
SNORD114-20	NA	NA
UCP1	2.15589e-36	4.02367e-34
F9	4.2793e-07	1.08195e-05
TOP2A	0.000257299	0.00230972
HMGN5	3.99154e-08	1.21944e-06
HMGN4	4.57082e-16	2.76811e-14
HMGN1	0.000192626	0.00188028
LOC646813	0.00012488	0.00137616
LOC285548	6.36352e-43	1.55528e-40
LOC728410	8.02494e-10	2.93676e-08
KIAA0368	0.00040194	0.00316756
EFTUD1	0.000785104	0.0049809
MAP1LC3A	1.16724e-07	3.29168e-06
FBXW8	0.000696324	0.00457457
SNORD115-20	NA	NA
SNORD115-22	NA	NA
SNORD115-25	NA	NA
GDI1	2.16706e-05	0.000344081
ADAM5P	1.06162e-10	4.3503e-09
ERLIN1	7.86658e-05	0.000967651
ERLIN2	0.00195612	0.00915621
TM9SF1	0.000157087	0.00161903
KRT17	0.000169114	0.00171422
KIAA1107	0.00046228	0.00347514
KRT10	0.001368	0.00717919
GABRE	0.000409066	0.00319807
WDR38	4.18516e-10	1.59705e-08
NBPF6	0.000900685	0.00542897
NAPEPLD	0.000897862	0.00541991
SLC26A8	0.00179119	0.00861747
PLP2	2.86982e-06	6.03045e-05
PCDHB17	0.000136508	0.00146499
TRIM36	0.00130881	0.00696471
C10orf11	0.00175514	0.00851846
C10orf18	0.00145317	0.00746958
NAT1	2.03105e-10	8.12815e-09
SNORD114-29	NA	NA
FAIM2	4.66567e-05	0.000632317
SNORA27	4.76094e-20	3.78845e-18
ZNRD1	0.00145826	0.00748825
PTPRS	1.81458e-06	3.95892e-05
FABP12	3.84993e-14	2.04765e-12
CPSF4	0.000131363	0.00142693
CPSF3	0.000953725	0.00565895
IFT81	3.75885e-06	7.61789e-05
OR3A4	4.96555e-10	1.87395e-08
TTLL7	0.000894804	0.005412
AGPAT3	0.000255374	0.00230041
TEX28	NA	NA
PLA2G4F	6.91668e-18	4.78113e-16
SLC35F3	0.000100428	0.00116617
SLC35F2	0.000669139	0.00446279
MBD2	4.65447e-05	0.000632317
CMTM3	0.000419754	0.00325068
CMTM1	0.00136969	0.00718626
CMTM6	1.03519e-06	2.43164e-05
2019-12-01	2.96371e-87	3.57912e-84
TSPAN19	0.00148037	0.00755908
SLC17A8	4.54093e-05	0.00061985
TSPAN12	9.47608e-05	0.00111871
REXO1	0.00213646	0.00970602
SLC15A3	0.00110605	0.00623139
KIAA1429	0.00112272	0.00629076
SMCHD1	0.00095013	0.00564578
CCDC14	1.44114e-05	0.000243913
CCDC18	9.08314e-09	3.03708e-07
SRA1	0.00048703	0.00360315
FLJ45983	1.59333e-57	6.81482e-55
FAM100A	0.000513666	0.00373824
SYNCRIP	0.000992244	0.00582476
TRIM34	0.00153049	0.00772774
ZNF280D	0.00203105	0.00938943
ZNF280C	0.000545031	0.00388929
GNG5	0.000459164	0.00345728
DBF4	0.000258535	0.00231475
GNG3	0.000220882	0.00206781
RAB19	2.79602e-54	1.08306e-51
ALG9	2.0936e-26	2.41469e-24
ALG3	0.00198369	0.00924729
STAM	0.000985822	0.00579912
CLDN6	0.00192819	0.00905231
RASGEF1B	0.000336645	0.00279358
RASGEF1A	0.000163416	0.00166663
FIGN	0.00180273	0.00865326
LGALS7B	7.38415e-20	5.8083e-18
RTN1	0.00191659	0.00902467
MAGEB2	9.90893e-23	9.24684e-21
MAGEB3	2.12167e-19	1.61926e-17
MAGEB1	1.77883e-05	0.000290627
RTN3	0.000101995	0.0011777
KIAA0114	0.000129466	0.00141105
CLUL1	0.000788108	0.00498915
CSF2RB	9.39827e-05	0.00111144
INMT	8.13172e-07	1.93222e-05
C16orf70	0.000162012	0.00165642
ZBTB10	8.87498e-07	2.09912e-05
RCOR1	0.000529786	0.00381018
ADAP1	2.98489e-05	0.000445671
TMEM150C	0.00181173	0.00868834
ADAP2	0.000192326	0.00187842
C1orf158	0.000108369	0.00123122
DDX19B	3.14968e-05	0.00046688
C1orf151	0.000932994	0.00557624
GAB3	1.33373e-07	3.72032e-06
TAAR8	5.27003e-22	4.62366e-20
UNG	0.00125249	0.00674547
TRIM60	5.28793e-06	0.000102416
TRIM64	5.60907e-09	1.90337e-07
DMRTB1	9.25265e-51	2.83518e-48
C2orf63	0.00028739	0.00248826
C2orf69	0.000352868	0.00288234
NKD1	0.00125862	0.00676955
NPTX1	0.000607059	0.00416632
C13orf36	0.000229501	0.00212333
C13orf34	0.00222709	0.00996272
NPTXR	0.00142898	0.00738781
RRN3P1	0.000254017	0.00228927
SND1	2.22279e-05	0.000349954
PYDC1	0.000775823	0.00493574
CYBB	0.00158339	0.00791117
CEACAM18	0.000328874	0.00275471
LMAN1L	0.00219702	0.00986977
CEACAM16	1.65095e-15	9.5476e-14
DHCR24	0.000500942	0.00367298
PRCP	6.59473e-11	2.7858e-09
PPM1A	0.000244389	0.00222717
PHGR1	1.31829e-06	2.98067e-05
CMTM7	0.000863771	0.005303
NISCH	0.00189917	0.00896946
PRPF4B	2.24071e-05	0.000352235
RNF175	0.00147999	0.00755908
ZNF384	0.000382518	0.00305793
KRTAP3-2	5.53831e-17	3.57552e-15
MDM1	0.000862043	0.00529555
SNRPD2	9.31592e-06	0.000167916
SNRPD1	0.000170363	0.00172209
KPNA6	3.72132e-06	7.56423e-05
IFT46	0.00175634	0.00852025
UNC119B	0.00109773	0.00620837
CRX	5.80425e-24	5.81275e-22
ZNF749	0.00211787	0.00964933
FRS3	0.000167684	0.00170159
SLC25A15	0.0011129	0.00625193
RPS16	0.000564223	0.00397103
TNFRSF19	1.12477e-08	3.68873e-07
PC	0.000265426	0.0023559
CASP9	0.00142225	0.00736787
B4GALT4	1.47729e-06	3.28588e-05
B4GALT7	0.00142623	0.00737855
ROMO1	0.000459231	0.00345728
SGOL1	0.000884616	0.00538553
SGOL2	0.00124956	0.00674547
FAM174B	1.06093e-09	3.82119e-08
FAM174A	4.21542e-05	0.000589878
SPRN	0.000276431	0.00241804
L1CAM	0.00181662	0.00869757
RFX2	5.69936e-06	0.000109455
C6orf218	4.44327e-59	1.98305e-56
PTPN3	0.00185145	0.00880352
PTH2	0.000245298	0.0022313
MARK2	9.05006e-10	3.28264e-08
IGBP1	0.000402948	0.00316997
CD63	0.00170118	0.00831463
CD68	0.000899864	0.00542561
MAGEB16	1.60478e-05	0.000267348
TERF2IP	0.000125554	0.00138137
VSX1	0.000264107	0.00234927
S100A6	0.000329833	0.00275711
C1orf212	0.00150778	0.00765072
PAEP	1.67325e-08	5.40972e-07
DGKZ	0.000764769	0.00489882
C10orf35	0.0014171	0.0073523
HSPB3	0.001252	0.00674547
SNORA45	2.05292e-22	1.85667e-20
HSPB9	7.59044e-05	0.000941581
PLOD2	0.000574897	0.00401587
PGA4	0.00131862	0.00699155
FOXE1	0.000617816	0.00421668
LDLRAD1	0.00121592	0.00663728
HPCA	0.000280848	0.00244598
TICAM2	0.000197115	0.00191246
A2BP1	0.000682795	0.00452187
LIG4	0.000566708	0.00398539
CSNK1E	0.000264956	0.00235376
DEFB134	0.000349872	0.00286627
DEFB135	0.00141918	0.0073594
DEFB130	NA	NA
DEFB132	9.08787e-14	4.66435e-12
SNORD29	NA	NA
CRCP	0.00029484	0.00253373
KCTD17	0.00063305	0.00429211
CSPG4	0.00218153	0.00981953
KRTAP10-7	0.000241088	0.00220568
KRTAP10-1	0.000617355	0.0042165
ZKSCAN5	0.000219027	0.00205325
THEM5	1.78532e-05	0.000291337
GLIS2	0.00216826	0.00978403
GLIS3	0.000250639	0.0022638
BCHE	0.00172187	0.00839266
DCP1B	0.00214428	0.00973078
VIM	1.5962e-09	5.64861e-08
TGM5	0.000200899	0.00194001
TMEM106A	6.41485e-07	1.5641e-05
AJAP1	5.75365e-05	0.000753332
TMEM181	6.89957e-05	0.000872218
TMEM180	5.48611e-05	0.000725708
RIBC1	0.00173327	0.00844025
PGBD5	0.000226023	0.00209909
SMCR7L	0.0017813	0.00858829
TAF3	0.0019184	0.00902715
RNGTT	6.04779e-05	0.00078583
G6PD	0.000891556	0.00540409
TSPAN33	5.94166e-05	0.000774983
LOC653544	3.08866e-10	1.20095e-08
USP17	1.76139e-12	8.2372e-11
PPAPDC1B	1.19244e-05	0.000206164
CNO	0.00136236	0.00715692
UGT3A1	6.8844e-16	4.10863e-14
LOC100128023	1.04665e-08	3.46803e-07
PGPEP1	0.000317448	0.00267673
ZC3H7A	9.99525e-05	0.00116394
DSG4	1.36769e-06	3.0788e-05
TXNDC17	3.91577e-07	1.00113e-05
CIC	0.000372247	0.00299528
KARS	3.54866e-06	7.25561e-05
RAB39B	0.000493242	0.0036327
SSRP1	4.34781e-09	1.49265e-07
LOC389332	0.000328146	0.00274973
SPINK8	8.63947e-05	0.00103603
TXNDC12	0.000154066	0.00159774
C1orf97	0.00174237	0.00847853
LOC283392	0.00215795	0.0097583
C1orf96	0.000677586	0.00450352
FIGLA	2.26606e-55	9.12202e-53
C1orf175	0.000629669	0.0042735
DAP	0.000193689	0.00188725
C1orf173	0.00109749	0.00620837
MTA1	0.0016064	0.00800278
LRP11	4.85408e-07	1.21976e-05
ZNF329	0.00189918	0.00896946
GPC2	0.0011876	0.00653484
GPC6	0.000865331	0.00530623
HEPH	6.66225e-06	0.000124682
BBS7	0.000970277	0.00574223
KIAA1984	0.00199078	0.00926878
INSL4	2.18835e-07	5.86512e-06
C2orf44	2.2094e-05	0.000348648
C2orf43	0.000673552	0.0044838
OR52B2	2.70846e-14	1.44428e-12
OR52B4	1.40246e-08	4.55579e-07
CELA2B	1.86441e-18	1.36702e-16
PDE9A	0.0015672	0.00785128
ZSWIM4	6.01206e-05	0.000782178
TBCA	1.08449e-06	2.52433e-05
TMEM57	4.63978e-09	1.58494e-07
SCG5	0.000262149	0.00233793
TMEM51	0.000509683	0.00371584
GSC2	4.31477e-15	2.42028e-13
SNORD16	NA	NA
POLR3GL	0.00149082	0.00760031
SC65	2.33085e-10	9.22011e-09
RPL18	0.00145879	0.00748909
ORM2	5.81791e-07	1.43906e-05
PRRG3	0.0010109	0.00589597
ERI3	0.000477775	0.00356163
KRTAP11-1	3.96395e-19	3.00295e-17
HAS2AS	0.00127051	0.00680817
EDC4	0.000866928	0.0053128
SNORD36A	NA	NA
CYTSA	0.000100368	0.00116613
LOC388946	5.12426e-05	0.000685796
RPL23P8	0.000464002	0.00348171
MPV17	0.0010361	0.00598302
BYSL	0.00113978	0.00635451
HMCN1	0.000640085	0.00432695
RPS6KA2	0.000381979	0.00305793
RPS20	0.000176439	0.00176324
HBQ1	0.000107667	0.0012246
SENP5	0.000786093	0.00498387
MAGEB6	6.13781e-15	3.40565e-13
MINPP1	0.00134702	0.00709812
GANAB	0.000189469	0.00186026
WFDC5	2.32116e-21	1.96915e-19
MKI67IP	0.000539694	0.00385657
NPHP4	0.0010003	0.00585243
SNORD91B	NA	NA
ARF4	0.00123666	0.00669468
PPP2R2C	5.9119e-06	0.000113114
KLRAQ1	4.41923e-05	0.000609175
LOC100133469	5.91022e-15	3.28826e-13
SNORD87	NA	NA
IFIH1	0.000922314	0.00553496
ACTR10	0.00140354	0.00730411
EEF1A1	3.63531e-05	0.000525584
EEF1A2	0.000602756	0.00414976
FRRS1	0.000169945	0.0017204
SNORD86	NA	NA
TSPYL5	5.72066e-05	0.00074997
RPL7A	2.86354e-05	0.000431633
KIF4A	6.43304e-05	0.000825956
PEX14	0.000408943	0.00319807
ETNK1	0.0018489	0.00879543
DHRS7B	4.69262e-06	9.21909e-05
CD47	2.82402e-05	0.000426302
CA11	0.000558043	0.00393842
VMA21	2.66019e-05	0.000406352
CALY	8.3257e-05	0.00100901
EIF4E3	0.000246225	0.00223376
GLRA2	0.000341564	0.00281958
DZIP1L	0.00215624	0.00975574
WDR78	0.00025301	0.00228215
RPS29	0.000574678	0.00401587
ACTR1B	0.00169261	0.0082879
ACTR1A	6.1519e-05	0.000795331
WDR70	3.08676e-08	9.61625e-07
WDR75	0.00137319	0.00720092
WDR76	0.000283259	0.00246203
WNT3A	5.18276e-33	8.18477e-31
TRHDE	0.00111208	0.00624991
SYT15	0.00143447	0.00740314
RGS11	0.000625507	0.00425441
NID2	4.41188e-05	0.000609174
PRPF4	0.000935411	0.00558743
GSTTP1	4.015e-05	0.000567294
GSTTP2	6.27225e-22	5.45633e-20
CLEC1B	8.03177e-16	4.75194e-14
NID1	8.24154e-05	0.00100118
C5orf44	0.00122902	0.00667577
C5orf40	0.00117039	0.00647223
PABPC3	2.9837e-05	0.000445671
NCRNA00171	2.32508e-05	0.00036254
LEFTY2	0.000657935	0.00441008
NCRNA00176	0.000853583	0.00525745
ZWINT	1.11758e-05	0.000195766
FAM120AOS	0.00212187	0.00965741
KIF14	6.86564e-05	0.000868463
SH3BP5	3.66453e-05	0.000528692
GPHB5	0.00168894	0.00827937
PAK6	0.00177661	0.00857851
SH3BP2	0.000142124	0.00151181
ZNF200	0.000693006	0.00456007
KCNG2	0.00218413	0.0098269
DEFB116	NA	NA
DEFB113	NA	NA
DEFB118	0.00100583	0.00587476
DEFB119	6.37098e-32	9.4098e-30
LCN15	0.000300988	0.00256828
C10orf57	8.34536e-05	0.0010102
SPRR4	5.26737e-18	3.72893e-16
SPRR3	7.72664e-16	4.58462e-14
HIF1A	0.000130126	0.001415
OR8D1	0.000174328	0.00174925
RBMY1E	NA	NA
SNORD91A	NA	NA
TMEM194A	0.000197342	0.00191286
CALML5	1.70416e-12	7.98776e-11
COX19	1.4448e-05	0.00024433
PFN4	0.000356808	0.00290685
COX11	0.00135819	0.00713809
COX16	0.000291614	0.00251336
ANKRD13C	0.000991593	0.00582306
AIDA	0.000221046	0.0020681
TIMM8B	3.22761e-08	9.99439e-07
PPA2	4.3539e-06	8.61962e-05
PPA1	0.000331254	0.00276601
tAKR	6.75538e-05	0.000858749
MCTP1	0.0017352	0.00844565
MCTP2	0.00197003	0.00919894
BET1	0.000488303	0.00360866
MGC45800	0.00178196	0.00858829
C22orf30	0.000357117	0.00290822
C22orf36	0.000329214	0.0027563
GLB1	4.29344e-05	0.000597589
SH3PXD2A	1.58607e-07	4.36488e-06
KLHL13	0.0021684	0.00978403
SELENBP1	8.53757e-05	0.00102621
SYCN	8.53158e-05	0.00102609
FYN	8.08411e-07	1.92314e-05
WDR47	0.0015559	0.00780804
OST4	0.0001856	0.00183191
CCT6A	0.00055867	0.00393987
RUFY3	0.000106791	0.00121665
RUFY2	0.000114512	0.00128537
FCGR2A	0.00030909	0.00261999
CYP11A1	7.93006e-08	2.29949e-06
DPH3	0.00121498	0.00663394
DPH5	0.000426338	0.00328807
MUM1L1	5.58464e-05	0.000735896
WIBG	0.00166167	0.00819658
CKB	0.000647479	0.00435896
PTGS1	0.00157766	0.00788639
SLFN12	0.00122801	0.00667577
TM2D3	0.000170195	0.00172208
OR51B6	3.33709e-05	0.000488314
ACSM4	1.63637e-07	4.48528e-06
TRIM23	5.13726e-05	0.000686396
SRP9	0.000402036	0.00316756
GNPAT	0.000236063	0.0021684
RHOT1	0.000696719	0.0045757
F2R	8.38243e-06	0.000152834
NSMAF	0.00108777	0.00618786
LOC338588	0.000118318	0.00131728
DNAJC27	0.000519739	0.00376443
GNAO1	0.000101784	0.00117726
NTSR2	1.02605e-25	1.13251e-23
DNAJC21	0.00041111	0.00320672
NTSR1	3.43861e-05	0.000501026
ARHGAP9	4.90478e-08	1.47864e-06
ACN9	0.000918562	0.00551766
AEN	0.000975414	0.00575935
NOB1	0.000855955	0.00526776
RGS19	0.000147213	0.00154989
ANXA10	8.31254e-27	9.69639e-25
TMEM74	6.2944e-06	0.00011932
SLC39A12	0.000506797	0.00370005
SLC30A5	0.000573397	0.00401335
FAM86A	0.000618964	0.00422311
CNBD1	2.16719e-07	5.816e-06
MGC12982	0.000359291	0.00291779
CCT6P1	0.000112164	0.00126593
MRPL2	0.00105628	0.00606414
MRPL3	0.00059109	0.00408451
RALGAPA1	0.000426557	0.00328807
HOXC11	8.24742e-49	2.38478e-46
RUVBL1	7.27966e-06	0.000135128
ZNF616	0.000212036	0.00200604
SLC3A1	0.00177982	0.00858605
EIF4EBP1	1.3726e-05	0.000233854
EIF4EBP3	0.00108535	0.00617919
MS4A12	0.000226515	0.00210076
EDDM3B	0.00123285	0.00668705
BAG2	0.00111445	0.00625812
OR1L6	1.64175e-05	0.000271816
GMFG	0.000300976	0.00256828
CBLN2	0.000704665	0.00461714
CBLN3	9.56087e-06	0.000171061
XIRP2	0.00207623	0.00952514
PDHA2	3.40467e-06	7.0038e-05
SNORD50B	NA	NA
LCAT	0.000461082	0.00346995
LOC92973	0.00211142	0.0096349
FSCN2	0.000107073	0.00121919
PCNAP1	0.000467548	0.00350065
SNORD65	NA	NA
RPS6KC1	0.000417886	0.0032405
KRTAP22-1	NA	NA
MRPS14	5.58384e-05	0.000735896
BAGE	3.02505e-07	7.89127e-06
TMPO	0.000290569	0.00250857
IDO1	0.0006345	0.00430053
CAMK1G	0.00110055	0.00621656
ECM2	3.84363e-05	0.000547984
OR52D1	1.76267e-13	8.80479e-12
SMCR7	0.000258451	0.00231475
RAB3IL1	0.001364	0.00716371
LYPD4	8.09959e-11	3.37977e-09
HIST4H4	1.93237e-06	4.18919e-05
CATSPER4	6.32636e-18	4.40272e-16
AMHR2	4.24261e-17	2.76569e-15
ANKRD30A	7.19908e-07	1.74289e-05
LOC100133669	0.000413537	0.00321864
RGS9	8.04786e-05	0.000983467
PGLYRP4	3.11074e-09	1.07695e-07
TTBK1	0.000896855	0.00541701
LOC151009	0.000952351	0.00565407
KIAA1377	0.00147829	0.00755709
LOXL3	3.04132e-06	6.33892e-05
SNORD61	NA	NA
SNHG12	0.00207972	0.00953168
SNORD115-35	NA	NA
RDH14	0.000462783	0.0034755
KANK2	0.00147562	0.00754535
POLD3	1.63474e-05	0.000271092
DEDD2	5.24475e-06	0.000101868
BID	8.09963e-05	0.000988112
DOLK	6.67427e-08	1.97155e-06
UBR3	0.000487337	0.00360412
SNORD114-10	NA	NA
CDK2AP1	0.00204424	0.00942284
NALCN	7.52479e-08	2.19514e-06
KRTAP13-1	0.000494999	0.00363719
KIAA0427	5.57598e-06	0.000107499
NUCB2	0.00135016	0.00710919
TRIM72	0.000938267	0.00560151
SUZ12	0.00014222	0.00151206
C9orf24	0.000502814	0.00367917
C9orf25	1.07934e-05	0.000190205
C9orf21	0.000556146	0.00393081
ABHD3	7.63849e-07	1.82985e-05
ABHD4	0.000579557	0.00403743
NKIRAS2	0.000607686	0.00416693
WDR43	0.000224128	0.00208654
SERHL2	0.000101409	0.00117468
GRB2	0.00155499	0.00780804
PSG2	4.79008e-05	0.00064655
HOXC9	0.000279173	0.00243411
HOXC8	7.57309e-67	5.36123e-64
HOXC5	1.74217e-89	2.23543e-86
HOXC4	0.000231919	0.0021399
HOXC6	0.000807591	0.0050765
CD151	0.00148641	0.00757972
TGOLN2	7.35609e-06	0.000136177
FAM200A	0.000331302	0.00276601
SNORA41	8.79279e-09	2.94479e-07
SLC25A32	0.00131256	0.00697796
RBMX2	0.00190444	0.00898604
LSM6	0.0010048	0.00587041
LSM7	0.000319145	0.00268636
MFSD4	0.00195442	0.00915036
AKR7A3	0.00120484	0.00659891
POLR2J	0.00017529	0.00175461
FAM47E	0.00170348	0.00832279
CCNJ	0.000486432	0.00360132
BATF2	0.00120625	0.00660205
VPS72	0.00180506	0.00866244
FAM120A	0.000597647	0.00411873
MAPK15	0.00139128	0.00726896
PEA15	8.14182e-05	0.000991409
OR4F21	4.36876e-06	8.63459e-05
FZD2	0.000694209	0.0045636
FZD7	4.92495e-05	0.000662577
SNORD114-6	NA	NA
SNORD114-5	NA	NA
C10orf71	1.14794e-08	3.75871e-07
OR10W1	4.16848e-06	8.30058e-05
NCR2	6.69943e-05	0.000852693
FOXB2	3.063e-32	4.62378e-30
TACC1	0.0015233	0.00770088
TACC3	3.62727e-05	0.000525095
PICK1	2.57443e-05	0.000395903
VMO1	0.000653797	0.00439217
KIF20B	0.000856878	0.00527013
TMEM233	0.000128856	0.00140639
KIF20A	4.10953e-05	0.000578263
MKI67	0.000277993	0.00242653
CAB39	0.00181593	0.00869737
CKMT1A	0.000549341	0.00390625
CKMT1B	0.00168375	0.00826378
ANKHD1	0.00198816	0.00926184
BCL2L14	0.000189074	0.00185816
BCL2L11	0.00216678	0.00978403
BCL2L12	0.000302577	0.00257649
ESCO2	1.90853e-05	0.000308277
NUP43	0.00200268	0.00931009
SCARNA20	3.46221e-05	0.000503751
SCARNA21	7.67856e-08	2.23604e-06
MSX1	0.00168329	0.00826378
EIF3F	0.00110538	0.00622933
ZNF558	4.88916e-05	0.000659057
RPL3	1.28773e-06	2.92468e-05
NCDN	0.000617006	0.0042165
VCX2	0.000291093	0.00251004
PCDH9	0.000708607	0.00463007
RPL39	1.69434e-05	0.000278948
RPL36	0.000441737	0.00337007
RPL32	0.000162437	0.00165994
PRKD1	1.17661e-06	2.702e-05
BUB1B	0.000217351	0.00204408
SUMO2	3.4263e-07	8.85743e-06
TTC12	0.000657957	0.00441008
HSF4	0.000687055	0.0045321
TMPRSS11BNL	2.01167e-05	0.000323622
LHX9	3.90157e-18	2.79091e-16
MIB2	0.00145826	0.00748825
TOR3A	0.00155095	0.00779489
LOC113230	0.000455093	0.00343874
OR52H1	9.89415e-11	4.07885e-09
LEPROTL1	0.00101122	0.00589614
CTNNAL1	0.00145025	0.00745644
B3GALT2	5.92242e-10	2.20267e-08
MDFIC	0.00029482	0.00253373
STK4	0.00170858	0.00834175
OCA2	0.000383037	0.00305869
CXCL13	0.000262083	0.00233793
CXCL16	9.66889e-05	0.00113625
OR13C3	0.000237069	0.00217569
HCN1	0.00107893	0.00615118
HCN2	0.000203735	0.00196002
NTN1	0.00012446	0.00137321
MED10	0.00196975	0.00919894
JAM2	0.000171301	0.00172646
LRIT2	0.000391308	0.00310535
GOLGA7B	0.00161074	0.0080166
CHIC2	8.4436e-06	0.000153596
CHIC1	0.00122876	0.00667577
POM121L4P	4.11955e-49	1.2082e-46
CDC25C	0.000163085	0.00166491
TBC1D21	1.57967e-16	9.79775e-15
SARM1	2.96571e-05	0.000444099
SENP1	0.00218264	0.00982236
C21orf54	7.29528e-05	0.00090826
ING3	6.07478e-06	0.000115906
KIAA1949	0.000321836	0.00270474
CEP170L	0.000786067	0.00498387
NCRNA00052	6.91032e-24	6.88684e-22
ECHDC2	0.00194838	0.00912414
DAG1	0.000660633	0.00442121
GLA	9.11871e-05	0.00108212
NCOA3	0.000519833	0.00376443
BSX	7.85346e-05	0.000967651
NCOA7	8.61184e-06	0.000156185
NCOA5	4.4053e-05	0.000609029
NELL1	0.000373928	0.00300577
SPCS3	9.76566e-09	3.25469e-07
LOC442454	3.76948e-08	1.15849e-06
P4HTM	0.00149188	0.00760196
SNORA80	8.30727e-14	4.27439e-12
ZNF844	0.000233139	0.00214827
PLSCR2	1.34655e-22	1.23414e-20
EMID1	0.00183164	0.00873688
AK7	6.78613e-05	0.000860763
AK5	3.31921e-10	1.2833e-08
SMARCAD1	0.00115594	0.00641739
NCKAP1L	0.000532001	0.00381858
UGT2B7	6.68951e-12	3.01175e-10
OR1N1	5.22978e-38	1.09559e-35
GEN1	0.00205785	0.00945591
ZNF496	0.000828645	0.00514474
ZNF493	0.00197018	0.00919894
ERH	1.10188e-07	3.11593e-06
HERPUD2	0.00142473	0.00737514
CELP	2.69654e-30	3.5716e-28
TMEM55B	2.85006e-06	6.00121e-05
MTTP	0.000579828	0.00403787
SNCB	0.000481842	0.00358155
FCGRT	0.00011543	0.00129425
SNORA84	2.49612e-11	1.08571e-09
ITIH5L	4.28743e-16	2.60417e-14
FBN2	0.000548698	0.00390596
NCR1	6.63551e-39	1.41903e-36
RNF126	0.000701468	0.004601
MEX3C	0.00114034	0.00635481
MEX3A	3.6436e-05	0.000526412
C3AR1	0.00126208	0.00678382
ITLN2	4.5896e-32	6.82787e-30
PDE1B	0.00207048	0.00950301
PDE1A	4.04194e-06	8.07209e-05
CLCA3P	1.32681e-22	1.2215e-20
IMPDH2	0.000530048	0.00381018
FEZF1	4.66615e-05	0.000632317
UGT2B28	3.67377e-05	0.000529281
DNTTIP1	0.000584351	0.00405492
UBLCP1	0.00144745	0.00744764
SNORD12C	NA	NA
PRAMEF20	2.07004e-05	0.000331239
FEZF2	1.17621e-05	0.000204122
MTMR7	5.30502e-06	0.00010265
MTMR6	3.50546e-06	7.17519e-05
MTMR4	0.00202809	0.00938581
NR3C2	0.00200807	0.00932496
OR11A1	1.43959e-10	5.81785e-09
FCHSD2	0.000760931	0.00488032
SNORD123	NA	NA
SNORD126	NA	NA
SNORD125	NA	NA
HIGD2A	0.000408645	0.00319807
REXO1L1	6.6912e-17	4.27945e-15
UBA52	0.000237207	0.00217599
NOBOX	8.74072e-05	0.00104573
MIA	0.00143565	0.00740552
ADAMTSL4	0.000365944	0.0029613
ADAMTSL5	0.00147167	0.00753265
C6orf145	0.00181251	0.00869008
OR5B3	1.57719e-09	5.59235e-08
STK33	3.97599e-05	0.000563333
FARP2	0.000394346	0.00311981
C9orf40	0.000126977	0.00138902
C9orf46	0.000389857	0.00309623
FCER1A	0.00160127	0.00798422
PRMT8	0.00122801	0.00667577
BTG1	8.84298e-05	0.00105637
RPL30	0.000805241	0.00507104
DEPDC4	0.000925554	0.00554419
EEF1E1	0.00102364	0.00593267
ZFATAS	1.35451e-43	3.42876e-41
SCYL1	0.000390329	0.00309879
STXBP4	0.000721821	0.00469774
TMEM133	4.31054e-05	0.000599157
OR4D9	0.000313569	0.00265076
S1PR3	7.86349e-06	0.000144657
OR4D1	1.52786e-07	4.21599e-06
OR4D2	0.000104163	0.00119534
NOC2L	0.000266889	0.00236684
OR4D5	0.000194109	0.00189045
FANCG	0.000980371	0.00577699
ENY2	0.000874153	0.00534436
HAS1	0.000258534	0.00231475
FANCI	0.00105896	0.00607446
F13B	2.397e-15	1.37076e-13
HNRNPA1	0.000414144	0.00321938
SLC7A1	0.00219959	0.00987266
RPN2	0.000107155	0.00121945
KIAA1109	0.000226652	0.00210076
ARSB	4.36987e-06	8.63459e-05
IRS4	0.000117251	0.00130967
HOXA7	9.27356e-16	5.41437e-14
CDK1	0.000136034	0.00146238
CDK2	0.000145099	0.00152981
CDK4	9.86093e-05	0.00115353
ZNF502	0.000128056	0.00139914
NEURL	0.00105509	0.00606358
CEP57	0.000289859	0.00250349
CEP55	3.70662e-05	0.000532519
SOSTDC1	0.00187673	0.00889204
ZFHX3	8.37217e-05	0.00101099
FLJ32063	0.00140596	0.00731114
RGL1	0.000755129	0.004855
ROBO1	0.000614655	0.00420348
RGL2	0.00125515	0.00675444
MIIP	0.00127774	0.00683173
HSPD1	4.39404e-07	1.10823e-05
MTX2	0.000264791	0.00235331
ATP10D	8.54411e-05	0.00102639
PCDHB9	5.12051e-05	0.000685741
PRKCG	9.10135e-05	0.00108128
HIST1H3B	1.24686e-54	4.92268e-52
HIST1H3F	9.5244e-25	9.92568e-23
HIST1H3G	7.48537e-39	1.58428e-36
HIST1H3I	1.62336e-25	1.78223e-23
SEC11A	0.00142342	0.00737208
MATK	0.00133367	0.00704766
TBX15	0.000587471	0.00406768
PPIL3	0.0016828	0.00826378
PPIL5	0.000137572	0.00147151
MYADM	2.73677e-06	5.78638e-05
SNORA14B	6.14075e-12	2.77658e-10
CCDC99	0.000131937	0.00143164
CYP4F11	5.47022e-05	0.00072454
CCDC92	0.000334802	0.0027873
CCDC93	0.000112231	0.00126599
RTN4IP1	0.00210666	0.00961961
C15orf42	0.000430486	0.0033085
FAM25B	3.10914e-08	9.65667e-07
FAM25A	4.6586e-05	0.000632317
SETDB1	0.00116319	0.00644456
ROBO4	0.00200883	0.00932637
ZNF645	6.55668e-27	7.69192e-25
CTSO	9.22618e-05	0.00109361
CTSA	0.000341208	0.00281891
CTSC	0.00108176	0.0061632
RPL14	0.000345434	0.00284239
RPL17	0.000110182	0.00124698
RPL10	0.000746834	0.00481549
RPL11	0.00201994	0.00936737
RPL13	0.00142532	0.0073763
CTSS	0.000270788	0.00239005
FGFR3	0.000205838	0.00197286
VPS4A	3.15265e-05	0.000466983
PRMT5	2.37302e-22	2.13676e-20
SORBS3	6.82446e-05	0.000864319
NINL	0.00168703	0.00827395
SYP	0.000898766	0.00542377
AMMECR1	0.00135723	0.00713547
KRTAP23-1	NA	NA
CSRP2BP	0.00177503	0.00857848
SNORD48	NA	NA
USP28	0.0007668	0.00490682
TMEM150A	0.00119522	0.00655988
MIP	0.000203201	0.00195763
RGN	6.2155e-06	0.000118043
CARD8	0.00111482	0.00625848
USP20	0.000384044	0.00306429
CARD6	0.000941289	0.00560948
ERP27	0.000185823	0.00183301
PSMB8	1.46528e-05	0.000247183
UBA2	0.00223795	0.00999653
UBA1	0.000867438	0.0053128
UBE2H	8.98776e-05	0.00107029
UBE2M	0.000255799	0.0023018
UBE2C	0.00034565	0.00284303
UBE2Z	0.000189942	0.00186312
TAC1	0.000198068	0.00191808
RPRML	0.000158712	0.00162968
ADAMTS8	2.36251e-06	5.06288e-05
TIMM44	0.00205551	0.00945565
LFNG	0.000142538	0.00151231
PENK	8.35914e-07	1.97939e-05
MORF4L1	4.41159e-27	5.20516e-25
COCH	0.000117372	0.0013103
C21orf71	0.00125471	0.00675387
GPR65	1.193e-05	0.000206164
GPR61	0.000612408	0.00419371
GPR68	0.00185416	0.00880845
FAM171A1	0.00138173	0.00724014
SNORD114-9	NA	NA
IL4	1.08628e-23	1.06705e-21
IL2	4.21618e-07	1.06862e-05
IL3	3.71404e-05	0.000532972
VWA5A	0.0021734	0.00979794
ZNF443	0.00015306	0.00159185
GNS	6.40794e-05	0.000823763
ANKRD11	0.000211906	0.00200573
SNORD46	NA	NA
STK38	1.09604e-08	3.60605e-07
SPHKAP	0.00191529	0.00902063
DMC1	0.000152892	0.00159092
NT5C3	2.2016e-05	0.000347684
PUS3	0.000702611	0.00460703
SNORD115-2	NA	NA
SNORD115-3	NA	NA
MNS1	1.27451e-06	2.90408e-05
DPRX	7.11272e-30	9.3009e-28
KRTAP4-11	2.78825e-05	0.000422768
OR14J1	0.000772378	0.0049184
KRTAP4-12	1.46979e-10	5.92825e-09
C10orf105	0.000448297	0.00340734
SNORD27	NA	NA
CYCSP52	6.7783e-32	9.93989e-30
LDB1	0.00150198	0.00763445
TIMP3	0.00061738	0.0042165
EPX	0.000767423	0.00490682
PARL	0.000731631	0.00474428
KCNK1	4.72734e-05	0.000639344
PI4K2B	0.000883985	0.00538523
HIBADH	2.15747e-08	6.87779e-07
NHLRC1	1.22538e-06	2.80458e-05
PAFAH1B1	0.000372331	0.00299528
CXorf56	0.00202411	0.00938037
POLR2F	0.000351464	0.00287473
VAMP1	7.86721e-07	1.87992e-05
SUCLG2	0.000272003	0.00239556
BRSK2	0.000102734	0.00118224
BRSK1	2.49965e-07	6.57077e-06
SNRNP200	4.58507e-05	0.000624628
MEPCE	0.000393217	0.00311449
INADL	4.08172e-05	0.000575138
MYADML	1.139e-16	7.10751e-15
NUP205	1.6402e-05	0.000271778
ZNF217	1.92609e-05	0.000310626
HLA-H	0.000117847	0.00131347
F8A1	0.000553758	0.00392348
HLA-B	0.000270683	0.00239005
HLA-A	0.000531627	0.00381858
HLA-F	0.000377167	0.00302707
HLA-E	0.000454256	0.00343494
MMS19	1.90064e-05	0.000307246
CRYZ	0.00131651	0.00698941
DKFZP586I1420	5.07356e-17	3.28581e-15
NR5A2	0.00163828	0.00811444
TLX1	1.33014e-10	5.3968e-09
C13orf1	0.000256811	0.00230837
SNORD105	NA	NA
HIST1H2BH	5.84544e-77	5.21769e-74
GATAD1	0.000465874	0.00349124
IPO8	7.68483e-05	0.000951746
GHRHR	8.86562e-18	6.02686e-16
FOXN4	0.000277111	0.00241986
DCAF8L1	8.25798e-14	4.25971e-12
LOC401397	0.000680141	0.0045174
ZNF521	9.98322e-06	0.000177451
OR13D1	7.20167e-08	2.1182e-06
ANKRD34A	0.000437813	0.00334635
FERMT2	0.00144623	0.00744323
HOXB7	1.28804e-05	0.000221099
FERMT1	2.46536e-06	5.27778e-05
FADS2	0.00156391	0.00783673
CRNKL1	0.000535725	0.00383488
FADS6	0.000362199	0.00293563
SYNGR1	0.00124536	0.0067282
SYNGR3	0.000257933	0.0023134
HCG11	0.0018977	0.00896727
NXT2	0.00160012	0.00798312
NXT1	0.0017837	0.00859006
DGUOK	3.80422e-07	9.75039e-06
PET112L	0.00198906	0.00926391
AMZ2P1	0.00110113	0.00621656
ACAD10	0.000666573	0.00445322
AWAT1	1.78879e-19	1.37029e-17
AWAT2	2.61202e-62	1.41118e-59
C5orf28	0.00167728	0.0082478
SP9	0.000269043	0.0023808
DNASE2	2.25066e-05	0.000353528
USP14	0.00123596	0.00669468
SSBP1	1.65185e-06	3.63088e-05
SSBP3	0.00185161	0.00880352
RLTPR	0.000335889	0.00279295
TPD52L3	1.67035e-20	1.36622e-18
TAP1	0.00127072	0.00680817
ZCCHC12	0.00060301	0.00415012
VAMP2	0.000185891	0.00183301
JPH1	0.000644066	0.00434242
UBAC2	0.00189385	0.00895459
C11orf75	0.00156145	0.00783014
SOS1	0.00155268	0.00779951
BOD1	0.0009795	0.00577421
FAM190B	0.000895052	0.005412
RPTN	4.70409e-14	2.48904e-12
SF3A1	0.000739691	0.00477693
MOBKL1B	2.03517e-05	0.000326423
FXR2	0.000339882	0.00281324
NEGR1	0.00166113	0.00819587
NEUROD6	0.000342664	0.00282222
CYP4X1	0.00101804	0.00591576
SNAP91	0.0013145	0.00698232
LST1	4.98124e-05	0.000667961
TARM1	0.00205791	0.00945591
CEP70	3.2926e-06	6.81421e-05
KLC1	0.000964003	0.00571004
CEP78	0.000530453	0.00381176
FBXW11	0.000885592	0.00538618
HINFP	0.000584904	0.00405678
SNORD35A	NA	NA
SNORD35B	NA	NA
OR2W5	0.000370777	0.00298629
CHCHD2	0.000201515	0.00194504
CHCHD3	1.62191e-05	0.000269618
VNN2	0.00113962	0.00635451
OVCA2	0.000879164	0.00536423
ZNF512	8.04264e-07	1.91772e-05
HNMT	4.73455e-05	0.000639897
TSPYL6	0.00202777	0.00938581
TRAPPC2P1	0.000939134	0.00560152
SLC39A8	9.4166e-05	0.00111297
MSTN	0.000163235	0.00166561
NBLA00301	2.23997e-05	0.000352235
SAMD12	0.000155656	0.00160826
RBMY3AP	NA	NA
GZMM	0.000434564	0.00333189
ZNF26	1.14934e-05	0.000200646
MYH15	0.00151615	0.00767796
MAP4K2	0.000206165	0.00197413
ZNF28	1.72488e-07	4.70902e-06
OR6K3	6.77742e-05	0.000860763
DNM1P35	0.000963664	0.00570967
PPEF1	0.000392698	0.00311398
LEF1	0.00162923	0.00808903
PRPH2	0.000188983	0.00185815
NAA38	0.000297539	0.00254945
LOC100169752	NA	NA
FITM2	0.00138586	0.00725617
GREB1L	9.43054e-06	0.000169684
RBM4	0.00039724	0.00313667
RBM3	0.0016082	0.00800787
AP1S3	0.000307723	0.00261272
SNORD24	NA	NA
VSTM2B	6.34327e-07	1.54848e-05
WWP1	0.000246678	0.00223586
CAD	0.00124433	0.00672538
PGF	0.0020907	0.00957227
PGD	0.000550787	0.00391268
C20orf118	1.10001e-07	3.11542e-06
SNORA8	0.000101817	0.00117726
DEFA6	2.15958e-13	1.07351e-11
PGP	0.000811145	0.00509536
POTEG	0.000173757	0.00174607
POTEB	2.06722e-11	9.0878e-10
ASIP	0.00068396	0.00452665
C21orf94	3.04031e-06	6.33892e-05
GPR44	0.000739214	0.00477535
C12orf65	0.000617627	0.00421668
CA3	0.000101994	0.0011777
CA7	0.0012812	0.00684621
FUT9	0.00222359	0.00995208
RPE65	0.000211096	0.00200083
SNORD28	NA	NA
VTCN1	0.000393371	0.0031145
NCRNA00092	0.000357736	0.00291095
DYNLT1	0.000262865	0.00234198
PA2G4P4	7.32296e-06	0.000135717
SIM1	6.49821e-14	3.38599e-12
NRG1	0.00203797	0.00940849
KIFC3	0.00207912	0.00953168
KIFC1	0.000243608	0.00222219
C10orf122	1.34788e-20	1.11133e-18
C10orf129	1.1448e-06	2.63603e-05
CYLD	0.00102539	0.00593664
EID3	8.01716e-11	3.35894e-09
EID1	0.000116751	0.00130599
HCRTR1	0.00108906	0.00619174
HCRTR2	0.000275928	0.00241467
PROS1	0.000271622	0.00239433
VAX1	0.00182469	0.00871388
PLA2G12B	5.4048e-41	1.26091e-38
NRGN	0.00040551	0.00318601
MT1M	0.00038424	0.00306466
ADAL	0.00192745	0.00905093
SF3A3	1.0875e-06	2.52562e-05
MT1G	0.000866855	0.0053128
TRA2B	0.00076723	0.00490682
ZNF20	0.000347078	0.0028502
ZNF22	0.000582354	0.00404593
WBP2NL	0.000570486	0.00400003
SEMA5A	0.000633022	0.00429211
LYNX1	0.000336472	0.00279328
SNORA1	0.000768128	0.00490682
OR1J4	3.66976e-18	2.63427e-16
OR1J1	1.24134e-13	6.30809e-12
LOC143666	0.00118282	0.00651809
UBL4A	0.00200769	0.00932496
RNPEP	0.00032743	0.00274597
SRRM5	0.00135585	0.00713
RNF113B	1.67829e-15	9.67846e-14
INTS12	0.000859739	0.00528456
FAM35B	0.000885716	0.00538618
FAM35A	0.000129831	0.00141328
GABRG2	0.00107459	0.00613156
NAE1	9.38369e-11	3.88401e-09
ST7	0.00222716	0.00996272
TXN2	0.000220808	0.00206781
AGAP3	0.00062256	0.00424341
RANBP6	0.000483722	0.00359291
PDCL2	1.05011e-07	2.99013e-06
SLAMF7	0.00138655	0.00725617
TMEM132D	0.000595544	0.00410837
HOXD4	7.16636e-08	2.11084e-06
GBAP1	0.0012178	0.00664046
C6orf105	8.32162e-05	0.00100901
KRTAP5-3	4.85917e-11	2.08265e-09
AQP11	0.00070013	0.0045937
YWHAE	8.12089e-05	0.000989447
SEC61G	3.09488e-08	9.62695e-07
FCRLA	0.00161269	0.00802244
CHRM3	0.00169643	0.0083038
CHRM2	0.00127643	0.00683136
CHRM1	0.000525261	0.0037921
MGAT3	9.59866e-07	2.25987e-05
CHST14	0.00179482	0.00863145
ROCK1	0.0015679	0.00785288
MMP8	1.86607e-39	4.1194e-37
MMP2	0.000386193	0.00307427
CAPRIN1	0.000706495	0.00462207
SEC61B	0.0021564	0.00975574
SLC28A3	1.44404e-44	3.75267e-42
CBFA2T2	0.000209082	0.00199093
C9orf84	0.00108965	0.00619341
C9orf86	5.28702e-06	0.000102416
C9orf82	0.000576062	0.00402009
FAM92A3	9.87326e-14	5.05482e-12
LRRC7	1.41943e-05	0.000240834
TNIP3	0.000231582	0.00213872
LOC134466	5.47648e-05	0.000724901
SHMT2	7.47901e-07	1.79794e-05
RPL39L	7.25085e-05	0.000904924
PPFIBP1	0.00211341	0.00963757
FTHL3	0.000553836	0.00392348
LDLRAD3	0.00152147	0.00769733
SIRPD	2.00183e-83	2.05487e-80
CSPP1	0.000157838	0.00162427
DOCK9	0.000110614	0.00124981
DOCK2	9.98684e-05	0.00116362
DOCK3	0.000393662	0.00311561
DOCK6	0.00197405	0.00921495
SAAL1	0.000362144	0.00293563
JUB	7.95828e-05	0.000974842
LIM2	1.40277e-09	4.99114e-08
PBXIP1	1.04019e-06	2.43779e-05
EIF5AL1	0.000166674	0.00169313
PLEKHB2	0.00120506	0.00659891
[truncated: 2,882 more rows]
