# Supplementary material for: Integrative analysis of DNA methylation and gene expression to identify key epigenetic genes in glioblastoma
Source: Aging (Albany NY). 2019 Aug 8;11(15):5579–92. doi: 10.18632/aging.102139 (PMC6710056; doi:10.18632/aging.102139)
Supplement: Supplementary Table 4 [file aging-11-102139-s010.xlsx]

## Sheet: Sheet1
sample	TCGA.32.1979.01	TCGA.4W.AA9T.01	TCGA.14.1450.01	TCGA.06.1804.01	TCGA.19.5954.01	TCGA.28.6450.01	TCGA.74.6573.01	TCGA.4W.AA9R.01	TCGA.OX.A56R.01	TCGA.76.6663.01	TCGA.06.5859.01	TCGA.06.0125.01	TCGA.76.4934.01	TCGA.06.5417.01	TCGA.26.A7UX.01	TCGA.06.A5U1.01	TCGA.19.5960.01	TCGA.19.5956.01	TCGA.14.0736.01	TCGA.26.5134.01	TCGA.81.5911.01	TCGA.28.5218.01	TCGA.76.6660.01	TCGA.28.5214.01	TCGA.19.5951.01	TCGA.06.0210.01	TCGA.06.0190.01	TCGA.76.6193.01	TCGA.14.0781.01	TCGA.06.5418.01	TCGA.76.4925.01	TCGA.74.6575.01	TCGA.26.6174.01	TCGA.26.5139.01	TCGA.06.6391.01	TCGA.26.6173.01	TCGA.76.4928.01	TCGA.28.5204.01	TCGA.19.5955.01	TCGA.12.5301.01	TCGA.06.6701.01	TCGA.06.6389.01	TCGA.06.5415.01	TCGA.76.6285.01	TCGA.06.6388.01	TCGA.76.6656.01	TCGA.14.1043.01	TCGA.06.A7TK.01	TCGA.76.4929.01
cg03050183	0.0912	0.3678	0.1868	0.0496	0.0482	0.067	0.1286	0.0942	0.0674	0.0904	0.1338	0.076	0.0666	0.8997	0.0712	0.129	0.2343	0.054	0.1601	0.076	0.0929	0.0705	0.1079	0.0899	0.0776	0.0929	0.0538	0.1508	0.0723	0.0576	0.1922	0.1125	0.1279	0.0594	0.0931	0.1007	0.0809	0.1092	0.0765	0.11	0.8182	0.7307	0.2618	0.0852	0.1153	0.0866	0.1214	0.277	0.1685
cg01156077	0.2105	0.114	0.1741	0.1234	0.1468	0.1075	0.2001	0.1188	0.1206	0.1783	0.5438	0.1737	0.3206	0.824	0.4886	0.1405	0.0922	0.0775	0.1148	0.1251	0.1455	0.142	0.1873	0.1931	0.0786	0.1509	0.13	0.1622	0.1078	0.1506	0.1358	0.2209	0.2852	0.1486	0.3949	0.234	0.1467	0.3864	0.14	0.2117	0.5382	0.6223	0.1839	0.0843	0.1968	0.209	0.1761	0.1269	0.2168
cg13604020	0.0246	0.0269	0.1965	0.0306	0.3468	0.0736	0.0219	0.0453	0.021	0.0861	0.3892	0.0173	0.0155	0.524	0.4221	0.0191	0.3402	0.0166	0.0193	0.0144	0.0178	0.0164	0.0156	0.0393	0.0567	0.029	0.0184	0.1595	0.0175	0.0179	0.0199	0.0208	0.0143	0.0192	0.0201	0.0163	0.0151	0.0206	0.0143	0.0137	0.3882	0.213	0.1669	0.0145	0.1354	0.0364	0.0268	0.2196	0.6353
cg16765160	0.0319	0.0282	0.0273	0.0239	0.0258	0.0249	0.0326	0.0352	0.0245	0.0274	0.0239	0.0233	0.0268	0.0364	0.0414	0.0353	0.0312	0.0251	0.0298	0.0323	0.0299	0.0307	0.0282	0.0325	0.0216	0.0303	0.0224	0.0199	0.0236	0.0251	0.0285	0.0287	0.0325	0.0349	0.0247	0.0301	0.0256	0.0207	0.0216	0.0408	0.0363	0.0304	0.0275	0.0202	0.0261	0.0312	0.0271	0.0408	0.0301
cg26366091	0.3386	0.1342	0.2183	0.0636	0.5941	0.2496	0.4758	0.4501	0.4117	0.4045	0.1579	0.3534	0.6847	0.803	0.6046	0.0743	0.5311	0.8638	0.1205	0.5635	0.2187	0.36	0.4893	0.5032	0.0528	0.2367	0.2552	0.3404	0.0575	0.0978	0.6972	0.2902	0.6533	0.2339	0.6175	0.3479	0.3443	0.2085	0.1363	0.7082	0.7782	0.7393	0.5306	0.4879	0.312	0.5187	0.4029	0.5933	0.246
cg01745370	0.1992	0.0861	0.0753	0.0637	0.1585	0.4037	0.5143	0.0426	0.2109	0.103	0.5121	0.0627	0.0742	0.404	0.0929	0.0958	0.3534	0.4921	0.0836	0.09	0.0882	0.0623	0.089	0.1197	0.0799	0.3651	0.0511	0.0565	0.103	0.2093	0.2419	0.144	0.0884	0.0284	0.3025	0.0807	0.1492	0.4191	0.0986	0.0436	0.3997	0.5338	0.1052	0.0425	0.1451	0.1955	0.2418	0.3076	0.281
cg07739472	0.7506	0.8609	0.9439	0.9108	0.8925	0.939	0.9534	0.8005	0.8669	0.951	0.8745	0.9413	0.9443	0.9315	0.8915	0.844	0.9299	0.9245	0.9457	0.9304	0.9634	0.9146	0.951	0.908	0.8063	0.9473	0.9312	0.9235	0.9095	0.9515	0.9291	0.953	0.9511	0.883	0.9067	0.9401	0.9154	0.9368	0.8967	0.9359	0.9604	0.892	0.9255	0.9067	0.9509	0.9557	0.9329	0.8429	0.9289
cg25831075	0.0887	0.1174	0.0525	0.12	0.071	0.061	0.0392	0.154	0.1764	0.0436	0.1039	0.0494	0.0934	0.075	0.0729	0.2414	0.1177	0.066	0.042	0.0609	0.0539	0.2302	0.0465	0.1111	0.0629	0.0451	0.0429	0.0635	0.1355	0.052	0.0704	0.0389	0.044	0.1155	0.0863	0.0525	0.2118	0.1213	0.1507	0.0734	0.0845	0.1076	0.0817	0.0538	0.0417	0.0506	0.1854	0.1627	0.0906
cg02775489	0.8844	0.9069	0.933	0.9248	0.9388	0.9471	0.9422	0.8957	0.8849	0.9115	0.9321	0.9332	0.9312	0.9473	0.8068	0.835	0.9272	0.9169	0.9384	0.7668	0.9474	0.9335	0.9259	0.9371	0.8891	0.9175	0.916	0.9136	0.8906	0.9594	0.9361	0.9413	0.9341	0.9353	0.9295	0.9327	0.9309	0.9501	0.9164	0.9466	0.9435	0.9313	0.9333	0.9298	0.9521	0.9364	0.9542	0.8944	0.9373
cg11525285	0.0764	0.1209	0.1249	0.1165	0.0586	0.0793	0.0836	0.6019	0.7347	0.159	0.1726	0.0749	0.6723	0.7876	0.4064	0.103	0.2905	0.0501	0.3502	0.0505	0.2903	0.1082	0.7727	0.3787	0.2551	0.0725	0.3085	0.167	0.1838	0.6726	0.3871	0.1194	0.3831	0.0483	0.0604	0.1379	0.4534	0.0831	0.0866	0.3738	0.529	0.4932	0.4745	0.1191	0.102	0.5261	0.0905	0.5522	0.5936
cg16400486	0.0564	0.0297	0.0472	0.0293	0.0534	0.0376	0.0355	0.0326	0.0451	0.0343	0.0421	0.0321	0.0523	0.0352	0.0315	0.0419	0.0384	0.0546	0.0349	0.0397	0.0375	0.0464	0.0468	0.0545	0.0442	0.0327	0.0282	0.0398	0.0244	0.0284	0.0416	0.0484	0.0394	0.0257	0.0623	0.0465	0.0288	0.0431	0.0385	0.0297	0.2502	0.0659	0.0362	0.0264	0.038	0.0421	0.0345	0.0551	0.0445
cg13903460	0.0329	0.0312	0.0501	0.082	0.0318	0.0402	0.0649	0.0348	0.0366	0.0469	0.0212	0.0567	0.0469	0.0286	0.0329	0.0332	0.0287	0.0505	0.0378	0.0468	0.0589	0.0397	0.0549	0.0339	0.0839	0.0515	0.0485	0.033	0.0257	0.0355	0.0345	0.0412	0.0471	0.0434	0.0311	0.0617	0.0367	0.0569	0.0362	0.0386	0.0425	0.0332	0.0346	0.0299	0.0456	0.0552	0.052	0.0304	0.0575
cg05799811	0.8782	0.8941	0.9301	0.7403	0.4905	0.9149	0.3383	0.2833	0.7292	0.9254	0.2319	0.762	0.6745	0.3121	0.5245	0.4904	0.6802	0.764	0.8476	0.5741	0.9539	0.6105	0.7903	0.943	0.698	0.5323	0.827	0.6147	0.8561	0.9019	0.9111	0.8166	0.7806	0.9226	0.629	0.8154	0.8732	0.9003	0.6967	0.8542	0.8595	0.7253	0.6989	0.5343	0.8109	0.9238	0.8685	0.8713	0.5772
cg14528525	0.0207	0.0214	0.0191	0.0181	0.0193	0.0163	0.021	0.0224	0.0201	0.0182	0.0192	0.0196	0.0305	0.0466	0.0206	0.0256	0.0272	0.0169	0.016	0.0336	0.0194	0.0298	0.0196	0.0273	0.0183	0.0185	0.0227	0.0237	0.0162	0.0291	0.0424	0.0197	0.0225	0.0345	0.0206	0.0223	0.0291	0.0286	0.0195	0.0265	0.0232	0.0175	0.0318	0.022	0.0192	0.0215	0.02	0.0242	0.0448
cg15386964	0.0285	0.0232	0.0158	0.0142	0.4218	0.0128	0.0197	0.0204	0.0218	0.0152	0.0155	0.0176	0.0532	0.0136	0.0173	0.0159	0.0209	0.5001	0.0186	0.0183	0.0162	0.0187	0.0155	0.0169	0.0455	0.0173	0.0196	0.4577	0.0187	0.0146	0.4533	0.0128	0.0199	0.0177	0.0808	0.0173	0.018	0.0164	0.0136	0.0139	0.3661	0.0387	0.0182	0.0123	0.0145	0.0175	0.2599	0.021	0.0162
cg15842116	0.0644	0.0371	0.0389	0.0286	0.0398	0.0402	0.0387	0.0397	0.0308	0.0511	0.0373	0.0332	0.048	0.0376	0.0361	0.0419	0.0279	0.0399	0.0346	0.0455	0.0466	0.0443	0.0482	0.0278	0.0296	0.0318	0.0366	0.0403	0.0236	0.03	0.0334	0.0441	0.0344	0.0342	0.0321	0.039	0.0333	0.0319	0.0287	0.0352	0.049	0.0449	0.033	0.0325	0.0398	0.037	0.0406	0.0431	0.0326
cg26967619	0.1204	0.1139	0.0832	0.0325	0.2017	0.0554	0.0858	0.0666	0.0379	0.0777	0.1451	0.0525	0.0667	0.4014	0.0951	0.1015	0.0817	0.0775	0.0845	0.048	0.0785	0.0969	0.0586	0.2186	0.1297	0.0864	0.1062	0.081	0.1025	0.052	0.1317	0.1014	0.0983	0.0528	0.1679	0.1127	0.0726	0.0939	0.0836	0.0561	0.6748	0.6897	0.1196	0.0257	0.0577	0.2016	0.215	0.0718	0.0657
cg23161317	0.2596	0.0788	0.017	0.0169	0.2495	0.013	0.102	0.0199	0.2525	0.0209	0.2245	0.0145	0.0249	0.9207	0.0155	0.0241	0.0148	0.0172	0.4131	0.0128	0.0144	0.0137	0.3254	0.0141	0.0114	0.3686	0.0161	0.3057	0.0123	0.0115	0.0161	0.0327	0.3834	0.0126	0.0763	0.0192	0.0184	0.0128	0.0304	0.0163	0.6699	0.6899	0.0524	0.2887	0.0138	0.0855	0.2821	0.0196	0.0388
cg00353340	0.0263	0.0397	0.038	0.0309	0.03	0.0304	0.0329	0.0367	0.0349	0.0384	0.0399	0.0271	0.0329	0.0805	0.027	0.0454	0.0238	0.0323	0.0277	0.0383	0.0313	0.0339	0.0306	0.0356	0.0343	0.0231	0.0258	0.0312	0.0255	0.0272	0.0354	0.0264	0.0346	0.033	0.0274	0.0328	0.0273	0.0537	0.0265	0.0263	0.3639	0.2956	0.0294	0.023	0.0351	0.0318	0.0317	0.0419	0.035
cg05021743	0.0352	0.5037	0.1277	0.0144	0.015	0.0499	0.0186	0.2263	0.4797	0.2016	0.0449	0.0273	0.7723	0.9658	0.018	0.2522	0.1512	0.8833	0.0224	0.8051	0.4912	0.5652	0.4395	0.4465	0.3091	0.0318	0.4188	0.2543	0.0211	0.0189	0.5922	0.1718	0.0951	0.0198	0.4173	0.0173	0.0398	0.0189	0.2621	0.0305	0.7278	0.6803	0.0202	0.027	0.4545	0.2633	0.1159	0.5341	0.5078
cg07811644	0.07	0.0501	0.0662	0.029	0.0401	0.0573	0.0499	0.0639	0.067	0.0601	0.0634	0.0431	0.034	0.0331	0.0552	0.0528	0.0521	0.0401	0.0665	0.0554	0.0646	0.0469	0.0579	0.0549	0.0542	0.0711	0.072	0.0344	0.0572	0.0534	0.0435	0.0831	0.0651	0.0458	0.0302	0.0758	0.0572	0.045	0.0441	0.0581	0.197	0.0497	0.0498	0.0309	0.0702	0.0566	0.0754	0.06	0.0491
cg02938429	0.28171	0.3014	0.259844	0.2624	0.4043	0.2024	0.2783	0.4075	0.3319	0.3161	0.3795	0.3403	0.3595	0.312	0.2657	0.3256	0.256	0.3798	0.1978	0.3545	0.2326	0.325	0.2397	0.481	0.270456	0.2367	0.2755	0.2624	0.3141	0.3276	0.3339	0.2129	0.2475	0.3038	0.2162	0.2545	0.3458	0.2782	0.334	0.3494	0.5357	0.2823	0.3787	0.2048	0.2652	0.2886	0.2835	0.3493	0.3654
cg20607764	0.0278	0.0306	0.0329	0.0243	0.026	0.0285	0.037	0.0275	0.0311	0.0328	0.0355	0.028	0.0343	0.079	0.0461	0.0353	0.0267	0.0296	0.027	0.0366	0.0309	0.0496	0.0376	0.0333	0.0226	0.0285	0.0251	0.0258	0.021	0.027	0.0513	0.032	0.0371	0.0825	0.0346	0.0265	0.0321	0.0278	0.0348	0.0351	0.0324	0.027	0.0326	0.0394	0.0402	0.0332	0.0342	0.0297	0.0737
cg20805999	0.1714	0.1997	0.0815	0.0924	0.1108	0.0843	0.063	0.2659	0.171	0.0848	0.1809	0.0615	0.1751	0.1254	0.1399	0.1696	0.106	0.0627	0.0534	0.1132	0.0657	0.1127	0.065	0.1695	0.07344	0.0606	0.0718	0.1027	0.1087	0.0805	0.1075	0.0674	0.0809	0.1518	0.1234	0.0858	0.1149	0.1399	0.1158	0.1023	0.087	0.113	0.137	0.2213	0.0738	0.0794	0.0638	0.1908	0.1081
cg02021817	0.0602	0.0447	0.0477	0.0655	0.0625	0.0416	0.1209	0.0424	0.0492	0.0497	0.0649	0.0369	0.0502	0.0621	0.0458	0.0556	0.0759	0.2846	0.0304	0.0543	0.0626	0.069	0.0466	0.0683	0.0388	0.0305	0.0391	0.051	0.0297	0.0658	0.0669	0.042	0.0698	0.051	0.0608	0.0455	0.0638	0.0767	0.0765	0.0827	0.0456	0.0668	0.0865	0.1029	0.0458	0.0561	0.0595	0.2931	0.0562
cg05291119	0.0833	0.0705	0.069	0.0604	0.0609	0.0619	0.0624	0.0577	0.1437	0.0537	0.0779	0.0551	0.0845	0.1212	0.0707	0.1417	0.0805	0.0678	0.0645	0.0934	0.0569	0.0917	0.061	0.0895	0.0198	0.0501	0.0619	0.0664	0.1165	0.0695	0.0854	0.0659	0.0451	0.1136	0.0728	0.0514	0.0776	0.1812	0.083	0.0671	0.5818	0.1484	0.0851	0.0396	0.056	0.0619	0.0444	0.064	0.1624
cg21082921	0.0696	0.097	0.0522	0.0508	0.0536	0.0466	0.0435	0.1283	0.0656	0.0538	0.051	0.037	0.0527	0.0445	0.0652	0.0705	0.0433	0.0394	0.045	0.0488	0.0399	0.0568	0.043	0.0526	0.0601	0.0351	0.04	0.0456	0.0692	0.0401	0.0488	0.0404	0.0445	0.0658	0.0697	0.0585	0.0568	0.0407	0.044	0.044	0.0482	0.0371	0.0602	0.0543	0.0447	0.0504	0.0479	0.1297	0.0637
cg14316440	0.0703	0.0899	0.0925	0.0608	0.0708	0.0639	0.0844	0.1021	0.0845	0.1062	0.0722	0.0848	0.0839	0.0928	0.0803	0.089	0.0966	0.0707	0.0803	0.0653	0.0816	0.0521	0.1115	0.0661	0.1134	0.0775	0.0722	0.0841	0.0652	0.0593	0.0661	0.0829	0.1071	0.0632	0.0639	0.0863	0.066	0.0688	0.0632	0.0648	0.3617	0.0822	0.0719	0.0697	0.0967	0.0926	0.1084	0.1157	0.0699
cg15658931	0.9111	0.9338	0.9521	0.9222	0.9298	0.9602	0.9549	0.8634	0.8929	0.9535	0.9504	0.9518	0.86	0.9106	0.9303	0.9045	0.941	0.9136	0.9287	0.8956	0.9597	0.8847	0.9566	0.9162	0.9398	0.9576	0.9523	0.9361	0.9408	0.7284	0.9103	0.9535	0.9496	0.8991	0.9376	0.9478	0.9214	0.9392	0.9337	0.9159	0.9568	0.9208	0.8981	0.915	0.9493	0.9578	0.9551	0.9069	0.8223
cg09500815	0.59	0.0314	0.4758	0.6651	0.0251	0.0178	0.0309	0.0321	0.0215	0.2967	0.0178	0.7637	0.022	0.0627	0.0291	0.4047	0.019	0.0184	0.0228	0.0187	0.549	0.0395	0.4533	0.6451	0.0247	0.3092	0.334	0.0247	0.0199	0.0244	0.811	0.0241	0.0358	0.3633	0.0207	0.0257	0.0226	0.0221	0.0243	0.0213	0.0641	0.0216	0.0255	0.0207	0.6161	0.6986	0.3452	0.0418	0.4606
cg06749854	0.4517	0.6092	0.5686	0.4963	0.5986	0.7464	0.5433	0.4837	0.5585	0.7394	0.5778	0.5287	0.6345	0.8835	0.4551	0.5153	0.8629	0.8104	0.5043	0.6251	0.5521	0.3712	0.598	0.6188	0.4532	0.5175	0.568	0.5606	0.6045	0.6383	0.5924	0.5576	0.68	0.5578	0.6774	0.6927	0.7066	0.6766	0.5398	0.666	0.7083	0.8013	0.8222	0.5303	0.5696	0.7277	0.5649	0.5573	0.5791
cg08324945	0.0452	0.0217	0.0335	0.0195	0.0232	0.0208	0.0255	0.0315	0.0338	0.0802	0.0195	0.0269	0.0336	0.0362	0.0277	0.0322	0.0199	0.0203	0.0267	0.0264	0.0218	0.0336	0.0238	0.0303	0.0666	0.0298	0.0254	0.0212	0.0347	0.0293	0.022	0.0174	0.0233	0.028	0.0207	0.0243	0.0268	0.0266	0.0231	0.031	0.5278	0.0255	0.0303	0.022	0.0171	0.0261	0.0267	0.0266	0.0324
cg06483239	0.1005	0.0601	0.0498	0.0637	0.0919	0.0342	0.0699	0.0931	0.0624	0.0943	0.0489	0.0715	0.0572	0.055	0.0591	0.0604	0.0692	0.0638	0.0488	0.0445	0.0918	0.0476	0.0664	0.0558	0.0366	0.045	0.0753	0.0756	0.0422	0.057	0.0655	0.0528	0.083	0.0574	0.0488	0.0697	0.055	0.0608	0.0476	0.0491	0.4498	0.0496	0.0618	0.0481	0.0686	0.1154	0.0587	0.0665	0.0487
cg07022880	0.0838	0.2201	0.0393	0.0416	0.0537	0.0387	0.0667	0.0564	0.1026	0.1084	0.0483	0.0419	0.0574	0.6081	0.036	0.0682	0.119	0.0984	0.0413	0.0346	0.0327	0.05	0.0475	0.0927	0.027	0.0416	0.0295	0.0611	0.0601	0.0368	0.0796	0.0422	0.1145	0.059	0.0612	0.0392	0.0435	0.0446	0.1579	0.0391	0.7224	0.0435	0.076	0.0417	0.0418	0.0438	0.043	0.0859	0.0531
cg09859272	0.0181	0.0247	0.0208	0.0192	0.0184	0.0178	0.0233	0.0242	0.0181	0.0215	0.0173	0.0201	0.0201	0.0205	0.0196	0.0227	0.016	0.0169	0.0188	0.0246	0.022	0.0247	0.0189	0.0229	0.0159	0.0203	0.0189	0.0198	0.0163	0.0221	0.0214	0.0229	0.0218	0.0208	0.0152	0.0229	0.0224	0.0213	0.0207	0.0199	0.024	0.0254	0.0198	0.0181	0.0214	0.0221	0.02	0.0214	0.0206
cg15377586	0.0273	0.057	0.0473	0.0254	0.0331	0.048	0.0494	0.0438	0.0353	0.0449	0.0478	0.0383	0.029	0.0356	0.0399	0.0441	0.043	0.0353	0.0477	0.0322	0.0559	0.0415	0.0472	0.03	0.0455	0.0251	0.0465	0.043	0.0303	0.0426	0.0343	0.0426	0.0618	0.033	0.0356	0.0484	0.0371	0.0309	0.0482	0.0358	0.0414	0.0568	0.0488	0.0398	0.0403	0.0451	0.0404	0.0552	0.0299
cg24166172	0.0199	0.0362	0.0282	0.0233	0.0231	0.02	0.0275	0.0479	0.036	0.029	0.0301	0.0254	0.0338	0.0238	0.035	0.0433	0.0239	0.0271	0.0282	0.0236	0.0362	0.0243	0.0278	0.0294	0.0248	0.0248	0.0282	0.024	0.0222	0.0207	0.0379	0.0258	0.0325	0.065	0.0282	0.0287	0.029	0.0285	0.0263	0.0238	0.0341	0.0254	0.0333	0.0197	0.0328	0.035	0.0318	0.0351	0.0266
cg19570723	0.0456	0.0527	0.0402	0.0389	0.0362	0.0361	0.0361	0.0699	0.0467	0.0671	0.0359	0.0434	0.0484	0.0825	0.0527	0.0535	0.0388	0.034	0.0411	0.0445	0.0375	0.0518	0.0533	0.046	0.0602	0.046	0.0438	0.039	0.0822	0.0608	0.0783	0.0721	0.0902	0.0493	0.0295	0.0514	0.041	0.0462	0.0344	0.0432	0.0387	0.0317	0.0578	0.0551	0.041	0.0449	0.0463	0.0588	0.0772
cg02954262	0.0217	0.0281	0.0619	0.0305	0.0248	0.0252	0.0462	0.038	0.2018	0.0429	0.0242	0.0381	0.0368	0.4594	0.0476	0.0299	0.0355	0.0264	0.0491	0.0236	0.0531	0.0416	0.0638	0.0329	0.0171	0.0335	0.034	0.0293	0.0367	0.031	0.0386	0.0458	0.0461	0.0554	0.0228	0.0393	0.0369	0.0341	0.0222	0.0326	0.4357	0.0258	0.0316	0.0189	0.042	0.0431	0.0396	0.0354	0.0922
cg10604168	0.1389	0.2508	0.1418	0.0759	0.1012	0.1082	0.1872	0.1423	0.0705	0.1468	0.4333	0.2771	0.1927	0.8918	0.1277	0.1826	0.1799	0.1925	0.0976	0.1336	0.1394	0.1559	0.1172	0.6508	0.1733	0.0949	0.1069	0.1539	0.2551	0.3835	0.1544	0.1562	0.2315	0.152	0.1934	0.14	0.1437	0.1043	0.1841	0.1184	0.7243	0.8011	0.4447	0.1159	0.1319	0.1832	0.4223	0.5419	0.2122
cg17845680	0.1197	0.1153	0.117	0.1075	0.1133	0.1008	0.1061	0.1369	0.1549	0.1027	0.573	0.0676	0.1	0.1768	0.0974	0.1365	0.4779	0.1254	0.0763	0.0954	0.0864	0.6364	0.121	0.1281	0.1128	0.0672	0.0588	0.1317	0.1394	0.0686	0.1509	0.0909	0.0954	0.1262	0.1803	0.0838	0.1111	0.1295	0.1336	0.084	0.3845	0.1532	0.1465	0.141	0.0812	0.1181	0.1075	0.2064	0.2076
cg24641993	0.0628	0.0438	0.0395	0.0444	0.0421	0.034	0.043	0.0497	0.0422	0.0427	0.0278	0.0442	0.0618	0.0575	0.0401	0.0543	0.0356	0.039	0.0455	0.0633	0.0385	0.0751	0.0373	0.0591	0.03813	0.0401	0.0367	0.0355	0.0418	0.0686	0.0585	0.0373	0.0363	0.0611	0.0368	0.0339	0.0739	0.0491	0.0336	0.0582	0.0336	0.047	0.0597	0.0256	0.0364	0.0428	0.0399	0.0432	0.0653
cg11190071	0.0339	0.0381	0.0281	0.0232	0.0291	0.0183	0.0266	0.0398	0.0243	0.0397	0.0681	0.0271	0.0417	0.5292	0.0236	0.0198	0.0289	0.0238	0.0312	0.0334	0.0233	0.029	0.027	0.0248	0.0334	0.0585	0.0276	0.0318	0.0313	0.0249	0.0422	0.0495	0.0552	0.0349	0.0204	0.0224	0.0393	0.0264	0.0253	0.0273	0.1079	0.0794	0.0273	0.0212	0.0457	0.0293	0.0406	0.0528	0.0267
cg08714407	0.0247	0.0208	0.0156	0.0133	0.0173	0.0189	0.0169	0.0273	0.0107	0.0324	0.028	0.0187	0.0154	0.0141	0.0174	0.0131	0.0498	0.0128	0.0186	0.0152	0.0183	0.0141	0.0196	0.0301	0.0394	0.0186	0.0198	0.0171	0.0242	0.0162	0.0345	0.0381	0.0305	0.0148	0.0138	0.021	0.0141	0.0164	0.0182	0.016	0.5259	0.0153	0.0173	0.0119	0.0257	0.0173	0.0243	0.1036	0.0181
cg01189112	0.1566	0.3496	0.2519	0.0405	0.2946	0.0922	0.2666	0.149	0.0832	0.119	0.1002	0.2501	0.3608	0.6968	0.1195	0.2438	0.254	0.2353	0.1092	0.3212	0.2445	0.0627	0.2566	0.0843	0.0786	0.2967	0.1334	0.0883	0.0588	0.1582	0.2188	0.1637	0.1745	0.0987	0.3239	0.1739	0.0483	0.1211	0.1274	0.3416	0.6095	0.3977	0.2048	0.0924	0.1536	0.3262	0.2965	0.2277	0.115
cg05806645	0.025	0.4054	0.2083	0.0622	0.0809	0.4765	0.1219	0.7241	0.0475	0.2809	0.0737	0.399	0.0646	0.404	0.4644	0.1463	0.0822	0.8807	0.0653	0.0346	0.0472	0.083	0.0761	0.1251	0.0672	0.1248	0.0508	0.5058	0.2942	0.084	0.0472	0.2327	0.3973	0.0463	0.2151	0.4975	0.2933	0.09	0.0896	0.2765	0.4762	0.792	0.1026	0.4937	0.1086	0.0761	0.1343	0.3753	0.7868
cg09247736	0.4317	0.9217	0.8428	0.854	0.6832	0.875	0.8162	0.7784	0.8793	0.8495	0.7034	0.774	0.8355	0.8908	0.5814	0.7176	0.7814	0.5581	0.8384	0.5282	0.8831	0.7901	0.7949	0.8813	0.7596	0.6723	0.8556	0.8391	0.8847	0.9169	0.8886	0.8441	0.8529	0.7343	0.7419	0.8169	0.9343	0.7839	0.7599	0.7724	0.8747	0.8865	0.8594	0.7478	0.7589	0.8216	0.8488	0.8986	0.7165
cg26450387	0.8043	0.789	0.9433	0.8837	0.9334	0.7177	0.6661	0.8485	0.7398	0.9416	0.9023	0.9062	0.8258	0.2613	0.895	0.854	0.9184	0.434	0.6684	0.2114	0.9548	0.7842	0.9307	0.8268	0.7735	0.8424	0.9213	0.9188	0.83	0.8986	0.922	0.8806	0.862	0.8454	0.7753	0.9185	0.8886	0.8779	0.8264	0.6985	0.9449	0.8967	0.8809	0.8403	0.9326	0.9497	0.9621	0.883	0.6403
cg04286043	0.0428	0.0376	0.0378	0.035	0.0379	0.0423	0.0427	0.0309	0.0236	0.0348	0.0439	0.0468	0.0534	0.0457	0.0311	0.0389	0.0728	0.0325	0.0425	0.0276	0.0373	0.0623	0.0481	0.0502	0.0289	0.0298	0.0298	0.0316	0.0257	0.0352	0.0321	0.0394	0.0318	0.025	0.0349	0.0408	0.034	0.0332	0.032	0.0482	0.1206	0.0255	0.0314	0.0515	0.0484	0.0459	0.0521	0.0522	0.0385
cg04304705	0.4601	0.5589	0.3825	0.0991	0.2994	0.5276	0.7562	0.2926	0.034	0.4371	0.6928	0.0534	0.0845	0.7554	0.2962	0.0444	0.7788	0.2103	0.0416	0.0657	0.1088	0.3227	0.1804	0.0726	0.0908	0.041	0.3902	0.346	0.2929	0.4064	0.2017	0.3433	0.1228	0.0271	0.1681	0.3194	0.2887	0.2028	0.1611	0.1291	0.6529	0.505	0.5301	0.0215	0.0356	0.36	0.2487	0.3664	0.0954
cg03698393	0.0334	0.0368	0.0473	0.0369	0.0398	0.0375	0.0523	0.0375	0.0354	0.0532	0.0988	0.0468	0.0421	0.9018	0.0326	0.0508	0.5793	0.0381	0.0433	0.0417	0.049	0.0358	0.0408	0.0433	0.0307	0.0343	0.033	0.0311	0.0438	0.0475	0.0469	0.0667	0.0796	0.039	0.0784	0.0497	0.033	0.0362	0.0395	0.035	0.6193	0.2817	0.0518	0.0298	0.0541	0.0438	0.0479	0.0535	0.041
cg07540542	0.0648	0.0528	0.0477	0.0523	0.0678	0.682	0.0723	0.0512	0.1123	0.0623	0.3297	0.0394	0.1001	0.6951	0.0429	0.1031	0.0799	0.2404	0.0594	0.0869	0.0518	0.1305	0.0599	0.105	0.0205	0.0298	0.0358	0.0498	0.0304	0.0793	0.0682	0.052	0.1961	0.0961	0.057	0.0728	0.0902	0.0711	0.0535	0.0987	0.1108	0.5889	0.0733	0.0432	0.062	0.0692	0.0643	0.0618	0.0786
cg19646538	0.504	0.1087	0.0905	0.0517	0.1285	0.0889	0.2032	0.1198	0.143	0.1053	0.295	0.0771	0.1623	0.2736	0.214	0.1443	0.2092	0.1225	0.081	0.1289	0.0795	0.1287	0.1406	0.2683	0.1358	0.0963	0.0857	0.2108	0.0574	0.0641	0.1952	0.1128	0.1526	0.0861	0.1398	0.0905	0.0605	0.152	0.0761	0.17	0.5545	0.2448	0.0875	0.0857	0.1086	0.1341	0.131	0.182	0.2253
cg04398282	0.8132	0.6761	0.9151	0.8691	0.8918	0.9162	0.9445	0.6492	0.8215	0.9412	0.8943	0.9131	0.8491	0.9011	0.8751	0.7693	0.9218	0.9037	0.8655	0.8925	0.9192	0.86	0.9299	0.8457	0.777	0.6895	0.8681	0.8739	0.7422	0.9027	0.8757	0.9035	0.9316	0.7987	0.8914	0.9184	0.6009	0.8849	0.8398	0.9099	0.9528	0.7925	0.8715	0.8786	0.9491	0.9387	0.8758	0.6816	0.8715
cg25195203	0.0318	0.0251	0.0216	0.0209	0.0211	0.0182	0.0216	0.0217	0.0244	0.0216	0.0263	0.0225	0.0275	0.0392	0.0222	0.0238	0.0185	0.0198	0.0241	0.0214	0.0187	0.0239	0.0177	0.0298	0.02225	0.0248	0.0243	0.0165	0.0417	0.0265	0.0374	0.0193	0.0209	0.0312	0.0244	0.0239	0.025	0.0248	0.0216	0.0217	0.0197	0.0287	0.0223	0.0191	0.0187	0.0205	0.0239	0.0231	0.0233
cg12101479	0.9168	0.8809	0.8834	0.8708	0.8893	0.8726	0.8941	0.6631	0.931	0.8294	0.8763	0.8175	0.799	0.7982	0.5363	0.8846	0.9455	0.5808	0.8823	0.5641	0.8723	0.9131	0.9026	0.8776	0.8858	0.8482	0.8418	0.8714	0.9254	0.683	0.9094	0.87	0.8691	0.7364	0.832	0.8642	0.8969	0.9164	0.8566	0.8953	0.8879	0.9128	0.81	0.6352	0.8152	0.8697	0.8966	0.7361	0.764
cg17900015	0.6014	0.8018	0.7955	0.7663	0.7104	0.748	0.3143	0.1749	0.5087	0.5438	0.3046	0.6689	0.1621	0.074	0.0724	0.6784	0.1554	0.282	0.408	0.1912	0.4559	0.6413	0.2172	0.4971	0.4334	0.4346	0.4924	0.4352	0.6542	0.4696	0.7799	0.599	0.4769	0.772	0.4434	0.5211	0.7716	0.6893	0.3395	0.1834	0.5785	0.3875	0.5419	0.4487	0.4816	0.7062	0.5708	0.4564	0.1549
cg25408901	0.284167	0.3106	0.7339	0.3484	0.3381	0.6244	0.1251	0.2449	0.3218	0.3713	0.274	0.4387	0.3662	0.4017	0.2023	0.24878	0.8268	0.2783	0.3291	0.4161	0.8513	0.252588	0.1323	0.4558	0.29227	0.5091	0.4389	0.3241	0.3037	0.2743	0.6292	0.1649	0.1358	0.372	0.3667	0.1253	0.3674	0.4024	0.3365	0.2984	0.1031	0.2702	0.3767	0.343	0.1234	0.4061	0.1598	0.4267	0.4151
cg24876786	0.0506	0.3725	0.068	0.0302	0.0797	0.0338	0.0263	0.6611	0.0404	0.0243	0.1969	0.0355	0.0324	0.0361	0.0299	0.0763	0.0597	0.0387	0.0257	0.0366	0.0326	0.0355	0.0963	0.0417	0.1275	0.0341	0.0601	0.1865	0.035	0.055	0.4476	0.0692	0.0266	0.0378	0.0537	0.0311	0.0538	0.083	0.0799	0.0311	0.0272	0.0392	0.0342	0.0298	0.0262	0.0429	0.0391	0.0723	0.1317
cg05153851	0.0397	0.0793	0.038	0.0223	0.0225	0.0194	0.0414	0.0648	0.0311	0.0589	0.0166	0.0368	0.0325	0.0222	0.0609	0.0208	0.0315	0.0244	0.0647	0.0288	0.068	0.0272	0.0527	0.0283	0.043	0.0528	0.0457	0.0166	0.0238	0.0328	0.0345	0.0561	0.072	0.0282	0.0135	0.0594	0.0327	0.029	0.026	0.0429	0.4427	0.023	0.0364	0.0238	0.0611	0.0548	0.031	0.0492	0.0344
cg10715223	0.0852	0.0176	0.0192	0.0104	0.0146	0.5554	0.0157	0.0189	0.0101	0.0755	0.508	0.0132	0.0108	0.9275	0.0113	0.0134	0.0447	0.1346	0.0151	0.0101	0.0135	0.5499	0.0144	0.1267	0.0277	0.018	0.0166	0.0143	0.028	0.0124	0.0118	0.0197	0.018	0.0116	0.0111	0.0231	0.0134	0.0129	0.1351	0.0759	0.7613	0.6852	0.0246	0.5499	0.0141	0.0151	0.0255	0.3434	0.012
cg25332298	0.2162	0.2508	0.0533	0.0558	0.0337	0.0616	0.3214	0.2398	0.0889	0.1277	0.0447	0.0342	0.03	0.0385	0.3906	0.3413	0.0841	0.0578	0.0345	0.0496	0.2928	0.0376	0.1747	0.0633	0.0765	0.0388	0.1043	0.3111	0.0837	0.0306	0.0362	0.0702	0.0769	0.354	0.0322	0.3363	0.1896	0.1016	0.2001	0.0307	0.1207	0.2271	0.0652	0.4687	0.0364	0.1023	0.0699	0.4138	0.0289
cg19425083	0.0547	0.0347	0.0332	0.0334	0.0275	0.0314	0.0357	0.0378	0.0366	0.0341	0.0308	0.0294	0.0628	0.0686	0.0369	0.0438	0.0304	0.0307	0.0268	0.0285	0.0326	0.0484	0.0338	0.0465	0.0286	0.0237	0.0344	0.0288	0.0332	0.0373	0.04	0.046	0.0481	0.0474	0.0484	0.0389	0.048	0.0381	0.0251	0.035	0.0342	0.0265	0.04	0.0336	0.0486	0.0342	0.046	0.0367	0.0513
cg02449821	0.036	0.2738	0.2752	0.3577	0.0781	0.5608	0.0273	0.5949	0.1492	0.4091	0.0254	0.2946	0.0258	0.3657	0.0246	0.0482	0.2633	0.3102	0.0235	0.0407	0.1158	0.0252	0.2483	0.5063	0.3082	0.0353	0.0811	0.2059	0.15	0.033	0.4415	0.2397	0.1013	0.1016	0.1902	0.0275	0.0593	0.0359	0.0441	0.0321	0.4691	0.274	0.5727	0.0337	0.2215	0.0687	0.1669	0.531	0.0257
cg20416037	0.0551	0.0899	0.1085	0.0505	0.0538	0.0643	0.0695	0.051	0.0826	0.1297	0.2057	0.0651	0.0876	0.6132	0.0619	0.074	0.0744	0.2591	0.0674	0.0459	0.0864	0.0994	0.0855	0.1573	0.0345	0.0806	0.0778	0.1034	0.127	0.0438	0.0373	0.1065	0.1351	0.0484	0.0555	0.1122	0.0456	0.0533	0.0938	0.0919	0.7691	0.5985	0.0605	0.0349	0.106	0.0793	0.1051	0.1056	0.0719
cg14158407	0.1265	0.123	0.0776	0.0735	0.0688	0.0604	0.0789	0.1689	0.064	0.09	0.0694	0.0473	0.0958	0.112	0.0814	0.0828	0.0858	0.1285	0.059	0.103	0.0737	0.0772	0.0818	0.1005	0.0562	0.0541	0.0622	0.1025	0.0753	0.0448	0.0644	0.0764	0.0869	0.1312	0.079	0.0673	0.0912	0.1564	0.0749	0.0684	0.109	0.1218	0.0994	0.0615	0.0717	0.0687	0.0973	0.1065	0.0994
cg04236540	0.0546	0.0371	0.0437	0.0442	0.1156	0.3024	0.2843	0.0439	0.0321	0.0565	0.2208	0.1164	0.0854	0.9014	0.0416	0.0521	0.0586	0.0586	0.0387	0.0478	0.0525	0.0383	0.0865	0.3162	0.0551	0.0795	0.0382	0.0524	0.0287	0.039	0.0365	0.1011	0.0924	0.0296	0.0476	0.0496	0.0303	0.053	0.0541	0.1356	0.7418	0.699	0.0438	0.0549	0.0492	0.1891	0.3494	0.0691	0.3033
cg06193004	0.2842	0.2401	0.2895	0.0668	0.1979	0.3364	0.328	0.1583	0.1033	0.1405	0.3198	0.322	0.529	0.7921	0.2054	0.2438	0.3228	0.245	0.128	0.1996	0.0941	0.2161	0.2778	0.2048	0.2499	0.1284	0.1249	0.291	0.1943	0.1875	0.4659	0.2293	0.2784	0.1281	0.4393	0.1371	0.1014	0.3532	0.2481	0.3272	0.7402	0.7075	0.2563	0.0791	0.1082	0.2758	0.5084	0.4785	0.178
cg00478333	0.0749	0.0582	0.046	0.0285	0.0926	0.0649	0.1117	0.0516	0.0627	0.0541	0.0651	0.0512	0.0536	0.0704	0.0695	0.0566	0.062	0.063	0.0623	0.0461	0.05	0.0691	0.0803	0.0578	0.1428	0.0502	0.0667	0.0459	0.0489	0.0433	0.0484	0.0692	0.0701	0.0457	0.0712	0.0616	0.047	0.0869	0.0403	0.0503	0.3436	0.0725	0.057	0.0416	0.0438	0.0897	0.0869	0.0651	0.0708
cg07070305	0.0551	0.0232	0.0135	0.0168	0.0136	0.0164	0.0228	0.0226	0.0176	0.0168	0.0234	0.0162	0.0156	0.0166	0.0181	0.0195	0.0215	0.0145	0.0185	0.0151	0.0167	0.014	0.0183	0.0166	0.0843	0.0174	0.0207	0.0152	0.0164	0.0189	0.0212	0.0168	0.0198	0.0159	0.0153	0.0164	0.0158	0.0203	0.017	0.0192	0.0177	0.0166	0.0158	0.0155	0.0136	0.0168	0.0158	0.0212	0.0145
cg12467749	0.3731	0.1076	0.327	0.3489	0.2176	0.1546	0.1356	0.55	0.6208	0.4292	0.2903	0.3638	0.1523	0.1523	0.0285	0.4451	0.5235	0.0652	0.2437	0.4426	0.3995	0.372	0.5371	0.3588	0.1389	0.386	0.4094	0.0862	0.1918	0.3926	0.8283	0.1838	0.0578	0.3237	0.1649	0.2564	0.3699	0.5442	0.2686	0.0351	0.1314	0.256	0.187	0.7297	0.4135	0.6783	0.1715	0.1736	0.5873
cg24856797	0.7229	0.6774	0.9086	0.8718	0.8742	0.8294	0.8913	0.4577	0.7808	0.8053	0.8544	0.9067	0.6734	0.8621	0.6969	0.6323	0.89	0.8868	0.8594	0.7889	0.9148	0.8374	0.9043	0.7771	0.5682	0.8123	0.7873	0.8156	0.8353	0.8859	0.8114	0.8744	0.7518	0.7209	0.7878	0.8894	0.8218	0.8334	0.7281	0.8558	0.8829	0.7848	0.7962	0.8235	0.7422	0.8727	0.9046	0.4834	0.7953
cg07647822	0.5288	0.3266	0.443	0.1189	0.5684	0.4515	0.6552	0.1474	0.3393	0.251	0.5186	0.1275	0.5642	0.8888	0.4764	0.1275	0.5971	0.3852	0.1878	0.0799	0.1628	0.6179	0.3365	0.5181	0.5426	0.4937	0.257	0.2394	0.3921	0.3108	0.2721	0.323	0.1989	0.1878	0.4303	0.3157	0.2273	0.3455	0.0577	0.3996	0.728	0.7298	0.4933	0.0585	0.1721	0.4841	0.5108	0.5206	0.7687
cg03552151	0.0451	0.0595	0.0541	0.0424	0.1252	0.0343	0.0493	0.0883	0.088	0.0585	0.5635	0.0308	0.1312	0.8824	0.0856	0.0499	0.0508	0.0313	0.0308	0.0473	0.0391	0.1517	0.0426	0.0591	0.0318	0.0397	0.0409	0.051	0.0348	0.059	0.0443	0.0385	0.0578	0.0681	0.056	0.0493	0.0512	0.067	0.0458	0.0555	0.8599	0.3831	0.0465	0.0556	0.0526	0.0511	0.0451	0.051	0.0474
cg19605920	0.0129	0.0138	0.0115	0.0094	0.0087	0.0092	0.0122	0.0145	0.0105	0.0153	0.0069	0.012	0.0126	0.014	0.0116	0.0103	0.0131	0.0083	0.0123	0.0131	0.0107	0.01	0.0137	0.0131	0.0191	0.0122	0.0118	0.0089	0.0087	0.0107	0.0107	0.0127	0.0213	0.0128	0.0095	0.0126	0.0102	0.0112	0.0079	0.0114	0.0113	0.0079	0.0153	0.0069	0.0129	0.0113	0.0126	0.0164	0.0123
cg04506585	0.0735	0.0405	0.0647	0.0339	0.0422	0.0162	0.0392	0.0609	0.0273	0.0459	0.0345	0.0291	0.0918	0.0432	0.0279	0.0347	0.0432	0.0169	0.0462	0.0391	0.0538	0.0516	0.0472	0.0464	0.0427	0.0302	0.0343	0.0332	0.0206	0.049	0.0455	0.0568	0.0586	0.0652	0.0652	0.0791	0.0554	0.0266	0.0305	0.0454	0.6051	0.0441	0.0624	0.0181	0.0334	0.0483	0.0581	0.0541	0.0475
cg15301489	0.0338	0.031	0.0262	0.0123	0.4551	0.0117	0.0943	0.0393	0.0123	0.0302	0.0122	0.0162	0.0145	0.0132	0.0369	0.014	0.016	0.0662	0.0192	0.014	0.0174	0.0123	0.0223	0.0155	0.0432	0.0209	0.0257	0.0167	0.0318	0.0133	0.1152	0.021	0.034	0.0138	0.0129	0.0246	0.0469	0.0177	0.0148	0.0186	0.029	0.0241	0.0156	0.0156	0.0202	0.0182	0.3121	0.0429	0.0151
cg03761471	0.152	0.1711	0.2103	0.1222	0.3613	0.0718	0.2364	0.2677	0.0843	0.3131	0.3533	0.0954	0.2152	0.36	0.1883	0.1238	0.3683	0.3362	0.1528	0.308	0.1605	0.3407	0.2526	0.3449	0.26109	0.0893	0.1722	0.3044	0.1975	0.0798	0.1835	0.2071	0.333	0.1738	0.1049	0.1246	0.178	0.1145	0.1488	0.2817	0.6652	0.4678	0.1844	0.2861	0.2289	0.2221	0.1876	0.3831	0.3127
cg21868134	0.0671	0.1302	0.0171	0.2183	0.7274	0.0237	0.2656	0.6914	0.0156	0.0345	0.3072	0.0949	0.5407	0.9596	0.0914	0.0267	0.803	0.0508	0.0197	0.1922	0.0345	0.0176	0.0738	0.4983	0.0523	0.5762	0.0566	0.5001	0.0289	0.2228	0.0557	0.0529	0.0223	0.0157	0.0304	0.0321	0.5367	0.0291	0.0258	0.4863	0.7733	0.7814	0.0471	0.0962	0.0545	0.0321	0.2085	0.2398	0.066
cg23864632	0.0152	0.0164	0.0179	0.014	0.0156	0.0133	0.0179	0.0183	0.0167	0.0216	0.0145	0.017	0.0208	0.0231	0.0195	0.0231	0.0141	0.0137	0.0165	0.0168	0.0186	0.0167	0.0186	0.0157	0.0147	0.017	0.0176	0.015	0.0137	0.0199	0.0223	0.0575	0.1777	0.0186	0.0157	0.0163	0.0168	0.0149	0.019	0.0167	0.0235	0.0154	0.0233	0.0148	0.0227	0.0202	0.0194	0.0198	0.0193
cg03513752	0.0473	0.02	0.0175	0.0166	0.0147	0.0153	0.0161	0.0251	0.0257	0.017	0.0315	0.0174	0.0275	0.0273	0.0216	0.0257	0.0209	0.0173	0.0185	0.0254	0.0157	0.0273	0.0193	0.0216	0.0325	0.0196	0.019	0.0179	0.0197	0.0198	0.0196	0.018	0.0168	0.018	0.0134	0.0171	0.0194	0.0168	0.0202	0.021	0.0198	0.0172	0.0242	0.0217	0.0187	0.0202	0.0228	0.0224	0.0291
cg07545278	0.1766	0.2294	0.1313	0.1593	0.0921	0.6248	0.1359	0.5178	0.0755	0.2159	0.2399	0.48	0.2944	0.9214	0.0984	0.1443	0.382	0.0721	0.0945	0.0934	0.562	0.0891	0.1668	0.353	0.0843	0.1096	0.0609	0.1162	0.1573	0.1456	0.0664	0.2937	0.2871	0.0827	0.1774	0.4857	0.4375	0.1018	0.1287	0.2183	0.7428	0.7243	0.4225	0.3163	0.292	0.2178	0.4383	0.5512	0.4363
cg01492649	0.0413	0.0466	0.0495	0.0361	0.0372	0.0332	0.0525	0.0657	0.0399	0.0395	0.0392	0.0363	0.0267	0.037	0.0482	0.0336	0.0489	0.038	0.0426	0.0393	0.0473	0.0352	0.0453	0.0277	0.0354	0.0369	0.0362	0.0385	0.0353	0.0231	0.0276	0.0586	0.0637	0.0307	0.0424	0.0431	0.0314	0.0288	0.0359	0.038	0.0468	0.0478	0.0462	0.033	0.048	0.0396	0.0411	0.0726	0.0378
cg18578096	0.4747	0.4539	0.4444	0.3391	0.3198	0.6385	0.3678	0.196	0.2176	0.353	0.3098	0.5434	0.2519	0.1657	0.3388	0.3192	0.3215	0.1902	0.3937	0.1685	0.3535	0.5854	0.2999	0.3904	0.4419	0.3713	0.3935	0.2948	0.4751	0.3634	0.3007	0.4188	0.2816	0.3366	0.213	0.5134	0.2718	0.7289	0.359	0.2691	0.2888	0.1567	0.5315	0.1367	0.248	0.5222	0.4978	0.2574	0.2288
cg02273769	0.0398	0.0368	0.0323	0.0306	0.0326	0.0265	0.0363	0.0732	0.0377	0.0484	0.0351	0.0232	0.0277	0.0304	0.0298	0.0347	0.0407	0.0297	0.0318	0.0352	0.044	0.0293	0.0298	0.0243	0.0419	0.031	0.0394	0.0322	0.0218	0.0233	0.0371	0.0422	0.0507	0.0455	0.0419	0.0364	0.0469	0.0311	0.028	0.03	0.0387	0.0244	0.0264	0.0326	0.0532	0.0418	0.0394	0.0512	0.0387
cg19866195	0.1072	0.1327	0.1264	0.0911	0.4295	0.4962	0.178	0.0629	0.0892	0.4963	0.1795	0.0585	0.1768	0.1045	0.0509	0.1114	0.476	0.411	0.0619	0.1642	0.1693	0.3961	0.081	0.3407	0.1001	0.2462	0.1064	0.1349	0.1838	0.1051	0.1995	0.2958	0.127	0.0823	0.1746	0.1697	0.3348	0.1638	0.0722	0.2603	0.855	0.5676	0.5475	0.0669	0.0837	0.4104	0.2081	0.1203	0.1148
cg15346168	0.2595	0.021	0.0185	0.0202	0.021	0.0151	0.02	0.0298	0.0288	0.0219	0.0313	0.0206	0.0321	0.9617	0.0191	0.0277	0.0725	0.0169	0.024	0.0304	0.0199	0.0269	0.0202	0.0262	0.0534	0.0242	0.0196	0.0178	0.0509	0.024	0.0233	0.0383	0.0512	0.0244	0.0187	0.0226	0.0271	0.0258	0.0199	0.0211	0.7827	0.7347	0.025	0.0189	0.0238	0.0217	0.0218	0.0248	0.0328
cg04845236	0.7027	0.9092	0.9285	0.8291	0.5934	0.8903	0.6453	0.316	0.8281	0.8423	0.6625	0.7702	0.7295	0.3109	0.3815	0.7592	0.9455	0.5547	0.8717	0.5564	0.9433	0.7081	0.3708	0.9036	0.6828	0.6088	0.9016	0.6345	0.8914	0.7736	0.9184	0.7601	0.665	0.7086	0.762	0.907	0.8673	0.9042	0.7789	0.7093	0.9441	0.9199	0.9061	0.4728	0.6714	0.4905	0.7657	0.7387	0.5708
cg10638599	0.0892	0.0689	0.0654	0.0826	0.1038	0.0756	0.0794	0.0638	0.1487	0.0602	0.126	0.0587	0.1345	0.326	0.0714	0.1764	0.0839	0.0665	0.0557	0.1138	0.0682	0.1385	0.0684	0.0903	0.0507	0.0732	0.0585	0.1143	0.0963	0.169	0.2066	0.0731	0.0759	0.1041	0.0872	0.0809	0.1341	0.1547	0.0669	0.1121	0.0812	0.0789	0.1713	0.1597	0.0638	0.0771	0.0906	0.0958	0.1981
cg06382236	0.0458	0.04	0.0358	0.0231	0.0308	0.0332	0.0279	0.036	0.0257	0.0272	0.0232	0.0254	0.0368	0.0319	0.0251	0.035	0.023	0.0302	0.0206	0.0319	0.0267	0.0291	0.0332	0.0308	0.0247	0.0236	0.0209	0.0335	0.0272	0.0211	0.0291	0.0286	0.032	0.0337	0.0377	0.0283	0.0359	0.0231	0.0299	0.029	0.0354	0.0346	0.0307	0.0263	0.0312	0.0324	0.0307	0.0402	0.0308
cg14534336	0.0297	0.0506	0.0437	0.026	0.0319	0.025	0.0368	0.0813	0.0657	0.0354	0.0335	0.0273	0.0583	0.028	0.0442	0.0787	0.0281	0.0302	0.0308	0.0454	0.0384	0.0372	0.0421	0.0378	0.0339	0.0274	0.0228	0.0341	0.0247	0.0368	0.0367	0.0443	0.0326	0.0594	0.0265	0.0361	0.0335	0.0436	0.0185	0.0444	0.0319	0.0249	0.0389	0.03	0.0375	0.0343	0.0339	0.0737	0.0529
cg02344943	0.3145	0.5167	0.5907	0.6599	0.5663	0.5929	0.4424	0.6252	0.5409	0.439	0.4894	0.6275	0.2757	0.0234	0.8172	0.4837	0.6746	0.0244	0.5819	0.4608	0.6106	0.0193	0.6584	0.6533	0.6507	0.4049	0.2538	0.434	0.2041	0.6016	0.8184	0.4927	0.3534	0.5223	0.0158	0.055	0.5655	0.731	0.4855	0.6205	0.0321	0.0236	0.6947	0.7186	0.0391	0.4106	0.1451	0.6082	0.6772
cg05439191	0.0216	0.0157	0.0198	0.0156	0.0146	0.0098	0.0176	0.0179	0.0155	0.0171	0.0142	0.0159	0.0129	0.0127	0.0212	0.0159	0.0133	0.0117	0.0229	0.0127	0.0132	0.0131	0.0175	0.0128	0.0357	0.019	0.0167	0.0119	0.02	0.016	0.0158	0.0146	0.016	0.0141	0.0094	0.0139	0.0127	0.0113	0.0138	0.0151	0.019	0.0122	0.0133	0.0137	0.0136	0.0154	0.0158	0.0215	0.0151
cg17255062	0.043	0.0254	0.0274	0.0191	0.0186	0.0164	0.0213	0.029	0.0276	0.0196	0.4543	0.0334	0.0351	0.0189	0.025	0.0253	0.0201	0.0168	0.0272	0.0305	0.0211	0.0231	0.0187	0.0253	0.0427	0.0293	0.033	0.0146	0.0218	0.0243	0.0324	0.0168	0.0182	0.0384	0.0151	0.0208	0.0285	0.0253	0.0172	0.0266	0.0152	0.0147	0.0231	0.0162	0.0193	0.0235	0.0219	0.0267	0.0296
cg17301902	0.4498	0.273	0.0752	0.0529	0.3379	0.6539	0.5268	0.4564	0.2699	0.192	0.4824	0.1667	0.2298	0.6105	0.1126	0.1236	0.8381	0.4191	0.068	0.4826	0.1678	0.1233	0.1586	0.3903	0.3008	0.45	0.3298	0.3726	0.2229	0.3582	0.378	0.146	0.3857	0.4817	0.1532	0.0711	0.4155	0.2232	0.2369	0.3655	0.454	0.4722	0.3299	0.3299	0.1405	0.1792	0.0945	0.4352	0.3762
cg12228707	0.0432	0.0514	0.0468	0.0344	0.122	0.0522	0.0384	0.0485	0.0331	0.0512	0.1546	0.0507	0.03	0.0374	0.0502	0.0608	0.0422	0.0423	0.0409	0.0408	0.0566	0.0477	0.0569	0.0423	0.0285	0.0388	0.0458	0.0409	0.0413	0.0468	0.0397	0.058	0.0542	0.0367	0.0402	0.044	0.0357	0.0423	0.046	0.0565	0.0544	0.1953	0.041	0.0534	0.048	0.0429	0.0463	0.0472	0.0376
cg08196842	0.039	0.0485	0.157	0.0459	0.1271	0.043	0.6596	0.0499	0.0838	0.117	0.6155	0.0527	0.0837	0.9079	0.4688	0.0834	0.1317	0.0472	0.052	0.0734	0.0551	0.6841	0.0695	0.3392	0.0513	0.3184	0.0475	0.0725	0.0748	0.0903	0.0483	0.1604	0.3998	0.0789	0.0797	0.0728	0.0742	0.0889	0.0519	0.0714	0.8853	0.8177	0.1758	0.0442	0.0646	0.1737	0.4852	0.0817	0.2239
cg16929739	0.3379	0.3075	0.3885	0.4582	0.2181	0.2232	0.2759	0.1917	0.1181	0.4694	0.7752	0.2512	0.3058	0.932	0.2006	0.3194	0.6495	0.4953	0.265	0.5156	0.314	0.3037	0.3934	0.4187	0.2928	0.2751	0.3244	0.4854	0.6356	0.2449	0.1518	0.278	0.5301	0.2027	0.5128	0.3408	0.4596	0.1672	0.4369	0.3874	0.9313	0.7981	0.3389	0.4644	0.3314	0.2319	0.4256	0.7777	0.6575
cg21695485	0.3274	0.1107	0.1979	0.0817	0.2557	0.0511	0.5502	0.0802	0.0143	0.0293	0.2078	0.4418	0.1165	0.9391	0.1463	0.0162	0.2956	0.0141	0.019	0.3993	0.0234	0.022	0.4412	0.0221	0.8821	0.0235	0.1799	0.0253	0.0466	0.1783	0.2565	0.0352	0.3002	0.0173	0.1645	0.0202	0.0176	0.0329	0.1045	0.5808	0.7458	0.6636	0.0164	0.1861	0.2154	0.0846	0.0297	0.1604	0.2175
cg27046604	0.4336	0.3728	0.2411	0.1525	0.1992	0.4195	0.1794	0.4397	0.1446	0.3159	0.4335	0.2411	0.1787	0.5805	0.4426	0.2815	0.8259	0.2809	0.3143	0.4086	0.1877	0.5199	0.2551	0.1928	0.2958	0.1837	0.2392	0.2896	0.2142	0.4712	0.2004	0.2601	0.3341	0.1422	0.4052	0.3904	0.3612	0.5227	0.2468	0.1498	0.811	0.7725	0.3529	0.3587	0.4129	0.1989	0.4374	0.2343	0.1389
cg17081157	0.0359	0.0275	0.0323	0.0251	0.0236	0.0307	0.0274	0.0316	0.0299	0.0397	0.0282	0.0242	0.0275	0.0259	0.0363	0.0311	0.0247	0.0339	0.0344	0.0345	0.0277	0.0359	0.0299	0.033	0.0349	0.0254	0.0173	0.0197	0.0316	0.0276	0.0314	0.031	0.0407	0.0608	0.0241	0.0276	0.0217	0.025	0.0278	0.0266	0.0375	0.0315	0.025	0.0231	0.0279	0.036	0.0326	0.031	0.034
cg20234121	0.0447	0.0429	0.0364	0.0257	0.0919	0.1055	0.1306	0.0689	0.0318	0.0543	0.1124	0.0459	0.0989	0.0462	0.1049	0.0438	0.0331	0.0834	0.0412	0.0581	0.034	0.092	0.1123	0.1471	0.0673	0.0617	0.0369	0.0847	0.0345	0.0529	0.0365	0.0481	0.0815	0.0347	0.0652	0.0403	0.0259	0.0532	0.0631	0.0704	0.2811	0.0273	0.1256	0.0368	0.0445	0.1103	0.1187	0.1321	0.0475
cg23444305	0.0869	0.0718	0.0505	0.0549	0.0565	0.0404	0.0378	0.0765	0.0654	0.0497	0.0377	0.0381	0.0751	0.0578	0.0434	0.0816	0.0411	0.0509	0.0418	0.0651	0.0441	0.0696	0.043	0.0536	0.0354	0.0368	0.043	0.0639	0.0648	0.0583	0.0484	0.0402	0.0566	0.0757	0.046	0.0477	0.0661	0.067	0.058	0.0495	0.0647	0.0495	0.0583	0.0553	0.0598	0.046	0.0552	0.1024	0.0989
cg22847221	0.1178	0.0771	0.1426	0.0649	0.1344	0.2441	0.1888	0.0685	0.0622	0.2099	0.0935	0.0654	0.1403	0.5314	0.1476	0.4195	0.0978	0.0595	0.0755	0.0974	0.0916	0.0854	0.1539	0.5306	0.0877	0.0637	0.078	0.0923	0.0657	0.1279	0.1316	0.18	0.1846	0.0584	0.0553	0.1284	0.1647	0.0772	0.2475	0.1406	0.1165	0.0558	0.0895	0.082	0.2123	0.2086	0.179	0.1357	0.0739
cg21495139	0.0259	0.0497	0.0294	0.0264	0.0247	0.0221	0.0279	0.2522	0.0364	0.03	0.0271	0.0356	0.0345	0.0416	0.036	0.0498	0.0287	0.0256	0.0385	0.0414	0.0253	0.0525	0.0736	0.083	0.0213	0.0243	0.0263	0.0282	0.0488	0.0359	0.0359	0.0251	0.0253	0.032	0.0246	0.0386	0.0503	0.0325	0.0321	0.028	0.1284	0.3124	0.0167	0.0273	0.0223	0.033	0.0298	0.0532	0.0468
cg11706083	0.7844	0.8351	0.8338	0.7145	0.5267	0.496	0.7377	0.375	0.8771	0.7442	0.8383	0.8381	0.7582	0.8196	0.4767	0.6256	0.5263	0.499	0.8403	0.6625	0.8529	0.4127	0.7731	0.8641	0.8499	0.779	0.7385	0.6544	0.8416	0.8125	0.8859	0.7807	0.749	0.8589	0.6409	0.627	0.8822	0.8927	0.7218	0.7042	0.8648	0.871	0.5931	0.5457	0.7471	0.5882	0.7825	0.3655	0.6177
cg09909351	0.064	0.0736	0.089	0.0686	0.0661	0.0804	0.235	0.075	0.0657	0.0922	0.1011	0.0859	0.0665	0.1406	0.1888	0.0694	0.2355	0.0718	0.0661	0.0647	0.0962	0.0692	0.0951	0.1792	0.1017	0.0832	0.1357	0.0586	0.0539	0.0753	0.0706	0.0974	0.1074	0.0668	0.0654	0.1004	0.0539	0.1863	0.0538	0.0727	0.3964	0.3379	0.1376	0.0645	0.0904	0.0912	0.1501	0.1254	0.0886
cg20888386	0.0724	0.0842	0.0795	0.0353	0.042	0.0659	0.0585	0.0626	0.0727	0.0649	0.3485	0.0321	0.0702	0.1479	0.0508	0.0507	0.2212	0.0325	0.0447	0.0436	0.0671	0.0456	0.0861	0.0808	0.0282	0.0595	0.0367	0.0496	0.0448	0.0334	0.0594	0.067	0.0917	0.041	0.0472	0.3017	0.0428	0.0406	0.0566	0.0982	0.3351	0.3914	0.0662	0.0405	0.0438	0.0687	0.0625	0.1178	0.0629
cg16111791	0.0766	0.0441	0.0768	0.0376	0.0452	0.0383	0.0518	0.039	0.0266	0.0614	0.0435	0.0402	0.0389	0.2579	0.0425	0.0325	0.0545	0.042	0.0517	0.0426	0.0714	0.0414	0.0823	0.0357	0.0495	0.0441	0.0549	0.0589	0.0627	0.0416	0.0492	0.0649	0.0649	0.0495	0.0535	0.0587	0.0448	0.0472	0.0375	0.0399	0.4236	0.105	0.0503	0.0535	0.0657	0.0733	0.0691	0.061	0.043
cg10023530	0.2691	0.4422	0.3799	0.4147	0.3475	0.6092	0.6389	0.2788	0.4632	0.2387	0.1644	0.4425	0.0756	0.1148	0.3814	0.5215	0.2674	0.0457	0.2698	0.0524	0.4192	0.1488	0.6503	0.5641	0.7019	0.5346	0.4717	0.2486	0.0808	0.4818	0.8052	0.4511	0.2988	0.4012	0.0478	0.3674	0.4729	0.6832	0.2028	0.1303	0.1759	0.0642	0.7313	0.4562	0.2405	0.4279	0.0976	0.3707	0.293
cg17621241	0.9072	0.938	0.967	0.9152	0.9489	0.957	0.9518	0.8995	0.9454	0.9599	0.9304	0.9264	0.9365	0.7631	0.892	0.9308	0.9524	0.6319	0.9246	0.8986	0.9561	0.9436	0.8332	0.9481	0.8522	0.91	0.9338	0.9401	0.9464	0.954	0.9499	0.9597	0.9265	0.9572	0.8484	0.9531	0.9587	0.9391	0.9388	0.9226	0.8417	0.9316	0.9478	0.9315	0.9295	0.9562	0.9605	0.9196	0.8895
cg14334286	0.0555	0.0372	0.0427	0.027	0.0305	0.0284	0.0482	0.0333	0.0461	0.0353	0.0257	0.0262	0.0946	0.0274	0.0258	0.0404	0.0363	0.022	0.0323	0.3339	0.0372	0.0352	0.0369	0.0349	0.0643	0.0263	0.0264	0.145	0.0326	0.1686	0.0463	0.036	0.0353	0.0405	0.1212	0.0424	0.0378	0.0284	0.0311	0.0311	0.0388	0.0213	0.0364	0.0272	0.0389	0.0476	0.0399	0.0429	0.0533
cg11199137	0.0198	0.0215	0.0221	0.0183	0.0204	0.018	0.0198	0.0272	0.0268	0.0225	0.1559	0.0186	0.0245	0.9476	0.0205	0.0277	0.0303	0.0485	0.0261	0.0224	0.0204	0.0282	0.021	0.0241	0.0196	0.0172	0.0216	0.0199	0.0193	0.0199	0.0253	0.0228	0.0226	0.0237	0.0182	0.0213	0.0206	0.0201	0.0208	0.0226	0.1633	0.4417	0.0225	0.0187	0.021	0.0237	0.0197	0.025	0.0256
cg08245425	0.0548	0.0322	0.0879	0.0403	0.0311	0.0405	0.0567	0.0352	0.04	0.0756	0.0298	0.0681	0.0394	0.0403	0.0423	0.0359	0.032	0.0497	0.0549	0.0302	0.0686	0.0424	0.0706	0.0283	0.0617	0.0435	0.0488	0.0295	0.0516	0.0518	0.0457	0.0709	0.0886	0.0306	0.0508	0.0611	0.0418	0.0386	0.0283	0.0486	0.0662	0.0329	0.0398	0.0337	0.0658	0.0637	0.0595	0.0308	0.0388
cg20690919	0.0116	0.0138	0.0139	0.0091	0.0089	0.0089	0.0134	0.0789	0.01	0.0223	0.0088	0.0128	0.0099	0.0105	0.013	0.015	0.0209	0.0099	0.0108	0.0106	0.0136	0.0101	0.0135	0.0112	0.01	0.0122	0.0134	0.0095	0.0104	0.0115	0.0104	0.0141	0.0111	0.0095	0.0087	0.0201	0.015	0.011	0.0092	0.0109	0.0149	0.0081	0.0126	0.0087	0.0142	0.0156	0.0157	0.0137	0.0101
cg19006130	0.0753	0.0742	0.0693	0.0426	0.0505	0.0316	0.0613	0.05	0.0347	0.0522	0.0315	0.0337	0.0552	0.9654	0.0556	0.0368	0.0399	0.0346	0.0443	0.0409	0.0685	0.0395	0.0733	0.049	0.0937	0.0448	0.048	0.0395	0.0403	0.0478	0.0549	0.0728	0.0535	0.0501	0.049	0.0525	0.0444	0.0304	0.0393	0.0354	0.6111	0.7115	0.0372	0.0396	0.0674	0.0519	0.0435	0.0665	0.0423
cg11257240	0.0191	0.0226	0.0203	0.0177	0.017	0.0124	0.0216	0.0186	0.0209	0.0197	0.0212	0.0167	0.0204	0.0207	0.0203	0.0255	0.0228	0.0183	0.0171	0.0207	0.0169	0.0235	0.0183	0.0215	0.0169	0.0173	0.0179	0.0178	0.0154	0.0219	0.0231	0.0217	0.0286	0.0229	0.019	0.0184	0.0201	0.0203	0.017	0.0213	0.023	0.0164	0.0219	0.0142	0.0217	0.0254	0.0176	0.0182	0.0228
cg23149560	0.064	0.0306	0.0593	0.0262	0.0351	0.0395	0.0356	0.0338	0.0464	0.0431	0.0262	0.0303	0.0565	0.0355	0.0334	0.0406	0.049	0.0295	0.0454	0.0401	0.055	0.0429	0.0281	0.0334	0.0314	0.0343	0.0435	0.0425	0.0417	0.0355	0.0688	0.0381	0.2214	0.0392	0.0327	0.0592	0.0433	0.0377	0.0232	0.051	0.0483	0.0329	0.031	0.0441	0.0448	0.0557	0.0482	0.047	0.0437
cg10894441	0.0699	0.0826	0.0847	0.0783	0.0708	0.0501	0.1117	0.0677	0.0517	0.1226	0.0568	0.0745	0.0382	0.1406	0.0542	0.0433	0.0604	0.0615	0.0653	0.0535	0.0933	0.0692	0.1118	0.0387	0.0733	0.047	0.0739	0.0611	0.0753	0.0489	0.0404	0.0763	0.0828	0.0416	0.0738	0.0911	0.0313	0.038	0.0434	0.0372	0.3461	0.2086	0.0445	0.0388	0.0901	0.1337	0.1009	0.0676	0.0536
cg06671996	0.8144	0.8716	0.937	0.8949	0.8692	0.8938	0.9035	0.517	0.8996	0.9376	0.9037	0.8993	0.742	0.9006	0.8728	0.9007	0.9199	0.5088	0.8438	0.4938	0.9412	0.9136	0.9346	0.914	0.8033	0.887	0.9226	0.9235	0.9145	0.9387	0.9159	0.9449	0.9259	0.891	0.8965	0.9299	0.9019	0.9082	0.8964	0.8579	0.9413	0.8913	0.9102	0.8422	0.9309	0.9302	0.9404	0.8364	0.7944
cg03459312	0.0682	0.0812	0.0971	0.0457	0.0712	0.062	0.0899	0.058	0.0708	0.1175	0.0776	0.0505	0.0892	0.3414	0.0399	0.1503	0.1951	0.0572	0.0969	0.0796	0.0739	0.12	0.083	0.1058	0.065	0.0533	0.0814	0.0684	0.1204	0.0719	0.0745	0.0727	0.0786	0.0866	0.0679	0.0683	0.0741	0.0921	0.1107	0.0652	0.8679	0.8333	0.0726	0.0737	0.065	0.0872	0.1057	0.0688	0.0913
cg11787626	0.712	0.892	0.9375	0.8702	0.7238	0.9182	0.8039	0.8395	0.8975	0.9428	0.753	0.9229	0.6793	0.5638	0.5637	0.8634	0.9352	0.8691	0.8746	0.635	0.9249	0.93	0.8359	0.9068	0.8876	0.8025	0.92	0.8932	0.8638	0.9188	0.7888	0.8663	0.8847	0.9151	0.8238	0.8877	0.9119	0.8433	0.8435	0.6397	0.9199	0.8302	0.7675	0.8368	0.6544	0.8861	0.9067	0.8796	0.7228
cg03847895	0.0693	0.1271	0.1961	0.1549	0.2581	0.1545	0.287	0.0842	0.1199	0.2748	0.35	0.1225	0.1548	0.1109	0.1503	0.168	0.3779	0.1541	0.0728	0.1099	0.1668	0.1324	0.1911	0.217	0.1886	0.1077	0.0944	0.2576	0.2518	0.1179	0.4079	0.2072	0.1986	0.1125	0.1538	0.1579	0.0947	0.1641	0.1782	0.0878	0.3581	0.2886	0.1418	0.1374	0.1742	0.3024	0.3543	0.1438	0.1374
cg12505146	0.0735	0.4145	0.0165	0.0133	0.0125	0.013	0.0153	0.022	0.0172	0.0207	0.0108	0.018	0.0132	0.5973	0.0178	0.0156	0.0133	0.0117	0.0194	0.0132	0.0274	0.0168	0.0167	0.0142	0.0529	0.0214	0.0155	0.0118	0.0181	0.0145	0.0123	0.016	0.0181	0.0167	0.016	0.0194	0.0158	0.0126	0.0146	0.0133	0.5379	0.0625	0.0131	0.0123	0.0149	0.0188	0.0166	0.0227	0.0149
cg06928741	0.8089	0.8513	0.8154	0.9508	0.9587	0.9606	0.9177	0.9515	0.9694	0.9638	0.9433	0.9086	0.9384	0.9641	0.9615	0.8393	0.9772	0.7629	0.8325	0.9648	0.9151	0.7467	0.9168	0.9294	0.9719	0.9115	0.8405	0.9145	0.74	0.9693	0.9778	0.9095	0.9366	0.9721	0.9574	0.8697	0.8313	0.9742	0.8879	0.9526	0.9742	0.9662	0.9226	0.9272	0.9386	0.9366	0.9094	0.9192	0.9396
cg01735621	0.0623	0.046	0.5331	0.043	0.5703	0.4192	0.3497	0.4881	0.1233	0.4694	0.237	0.0872	0.2686	0.8962	0.7709	0.0666	0.0896	0.0789	0.0454	0.5159	0.0795	0.141	0.8195	0.6491	0.4212	0.6152	0.0568	0.201	0.2723	0.7719	0.1377	0.5221	0.4695	0.2434	0.2319	0.1906	0.4248	0.0665	0.2929	0.0946	0.5546	0.7841	0.1072	0.0474	0.0632	0.5575	0.5126	0.3089	0.0829
cg07628705	0.3642	0.3418	0.148	0.2823	0.5172	0.0814	0.3558	0.0943	0.6602	0.268	0.6099	0.0814	0.0848	0.8716	0.0738	0.2118	0.2339	0.071	0.1442	0.3932	0.1972	0.3284	0.7481	0.7043	0.0592	0.4211	0.3585	0.1691	0.3125	0.2781	0.1796	0.2628	0.1618	0.5217	0.3035	0.3252	0.489	0.3463	0.2313	0.4164	0.7709	0.7148	0.523	0.1353	0.154	0.6141	0.2634	0.4329	0.5453
cg08526162	0.0949	0.0657	0.0541	0.0831	0.0656	0.0414	0.0531	0.0714	0.0608	0.0504	0.0587	0.049	0.075	0.1486	0.0515	0.1136	0.0519	0.0579	0.0352	0.0696	0.0466	0.1118	0.0523	0.121	0.05351	0.0441	0.0551	0.0547	0.0482	0.0683	0.0837	0.0446	0.0461	0.1005	0.0728	0.0561	0.0732	0.0755	0.0617	0.0655	0.0639	0.0459	0.0928	0.0387	0.0607	0.0512	0.0592	0.0597	0.0898
cg05670898	0.4941	0.3214	0.2288	0.1897	0.3942	0.6404	0.4795	0.4344	0.2739	0.3799	0.2017	0.4505	0.5284	0.7564	0.1385	0.28	0.6384	0.7094	0.2837	0.3639	0.2238	0.6092	0.3539	0.4434	0.5482	0.2094	0.2218	0.316	0.2179	0.6585	0.5111	0.4148	0.38	0.3279	0.3232	0.2404	0.3163	0.3768	0.2035	0.3401	0.6918	0.6473	0.5661	0.1622	0.3162	0.5201	0.5443	0.214	0.3699
cg02506908	0.3605	0.5109	0.4302	0.2648	0.4353	0.5225	0.3614	0.2057	0.173	0.5656	0.6295	0.3341	0.4471	0.7271	0.2658	0.4035	0.1557	0.5301	0.3527	0.6634	0.3479	0.7427	0.4616	0.5449	0.2885	0.4004	0.5101	0.6414	0.7807	0.4585	0.3122	0.5259	0.8608	0.3372	0.6302	0.4481	0.6169	0.4235	0.5323	0.4945	0.8962	0.9029	0.3962	0.6893	0.381	0.3294	0.6098	0.7644	0.4931
cg25604994	0.0395	0.0381	0.0515	0.0301	0.0358	0.0261	0.0468	0.0332	0.0607	0.0502	0.0331	0.0597	0.0504	0.9346	0.0317	0.0426	0.0516	0.0365	0.0561	0.0511	0.0473	0.035	0.0643	0.0383	0.1054	0.0469	0.0401	0.0351	0.0364	0.0415	0.0437	0.0579	0.0633	0.0434	0.0404	0.0426	0.0342	0.038	0.0358	0.035	0.8062	0.7908	0.0373	0.0353	0.045	0.048	0.0804	0.0362	0.0482
cg24341498	0.0199	0.0481	0.0965	0.0489	0.0155	0.0337	0.0966	0.032	0.0556	0.1238	0.0754	0.0816	0.135	0.5171	0.0503	0.0723	0.0956	0.0367	0.0961	0.0928	0.0952	0.0245	0.1088	0.046	0.0262	0.0687	0.0883	0.0333	0.0211	0.0325	0.0498	0.1073	0.1393	0.0482	0.0462	0.1165	0.0522	0.0375	0.0184	0.0953	0.6561	0.4259	0.1018	0.0184	0.1136	0.1248	0.1018	0.0496	0.0951
cg19349920	0.8722	0.8291	0.8303	0.8939	0.8365	0.8861	0.852	0.8295	0.8765	0.8615	0.5173	0.8042	0.8082	0.8555	0.7853	0.8128	0.8626	0.6893	0.8563	0.7661	0.8905	0.8731	0.7805	0.8452	0.8535	0.8276	0.8168	0.8672	0.8801	0.8161	0.8377	0.8395	0.8413	0.8617	0.683	0.8707	0.838	0.8707	0.8182	0.7059	0.5592	0.8929	0.8498	0.8734	0.7988	0.8563	0.8485	0.803	0.816
cg19991079	0.0218	0.0435	0.0526	0.0393	0.0448	0.0424	0.0464	0.0399	0.0407	0.0594	0.0253	0.0442	0.0292	0.0265	0.0447	0.0395	0.0366	0.0321	0.0461	0.0265	0.0508	0.0483	0.0584	0.0198	0.0416	0.0467	0.0445	0.0296	0.0343	0.0367	0.0271	0.0396	0.04	0.0251	0.0279	0.0418	0.0287	0.0323	0.0387	0.0331	0.068	0.0275	0.023	0.0232	0.0451	0.0435	0.0552	0.0473	0.0269
cg27131663	0.029	0.0587	0.0366	0.0228	0.0463	0.0319	0.0366	0.0354	0.0406	0.0545	0.0339	0.0287	0.111	0.0279	0.0507	0.0317	0.0383	0.0313	0.038	0.0375	0.0377	0.031	0.0476	0.0616	0.0287	0.0265	0.0348	0.035	0.0258	0.0322	0.033	0.0338	0.0525	0.0278	0.0368	0.0485	0.0247	0.0274	0.0456	0.0363	0.038	0.0267	0.0318	0.0211	0.0311	0.0443	0.0457	0.0453	0.0377
cg14955615	0.2108	0.1658	0.0905	0.1422	0.0885	0.1831	0.101	0.1339	0.1618	0.2245	0.3411	0.081	0.16	0.1218	0.1026	0.1983	0.0936	0.0578	0.0794	0.0849	0.178	0.1341	0.0755	0.2425	0.07917	0.0794	0.0771	0.1195	0.2025	0.1123	0.114	0.098	0.0534	0.2732	0.083	0.0673	0.1218	0.1694	0.1018	0.0893	0.0907	0.0952	0.1604	0.0738	0.0591	0.1038	0.2247	0.1546	0.1207
cg00824109	0.0235	0.0208	0.0211	0.0211	0.0239	0.0205	0.022	0.0233	0.0193	0.022	0.0201	0.0224	0.0242	0.0341	0.0202	0.0261	0.021	0.0239	0.0219	0.0226	0.0219	0.023	0.0212	0.0235	0.0232	0.0196	0.0213	0.0251	0.0212	0.0252	0.0224	0.0244	0.021	0.0285	0.0223	0.023	0.0248	0.0235	0.0212	0.0224	0.0313	0.017	0.0223	0.0222	0.026	0.022	0.02	0.019	0.0269
cg12503243	0.1318	0.111	0.0938	0.1284	0.1095	0.0799	0.0832	0.1299	0.2632	0.0733	0.1031	0.0676	0.2404	0.2226	0.0871	0.2198	0.1809	0.1421	0.1031	0.2831	0.0754	0.1068	0.0733	0.1553	0.062	0.0711	0.0843	0.1163	0.1188	0.0939	0.1207	0.1111	0.084	0.1842	0.2019	0.123	0.166	0.1865	0.0944	0.1186	0.0812	0.1351	0.182	0.2312	0.1194	0.0878	0.078	0.1323	0.2867
cg01799653	0.4143	0.5095	0.1266	0.0533	0.3748	0.1646	0.4699	0.3122	0.1831	0.1958	0.4298	0.4921	0.5004	0.8572	0.3599	0.081	0.4927	0.7737	0.1132	0.4837	0.0824	0.4915	0.6198	0.5307	0.4828	0.4776	0.2625	0.433	0.0674	0.4722	0.5195	0.2163	0.4243	0.3252	0.3073	0.1226	0.2181	0.4068	0.1493	0.4687	0.6588	0.5763	0.5142	0.1847	0.1802	0.5158	0.521	0.5183	0.5631
cg26013434	0.0304	0.022	0.0154	0.0124	0.245	0.03	0.0137	0.3451	0.0162	0.021	0.0342	0.0173	0.0232	0.8512	0.0174	0.0135	0.0263	0.0205	0.0158	0.0145	0.0378	0.0376	0.0697	0.1345	0.1755	0.0176	0.0199	0.0194	0.0127	0.0169	0.6746	0.0189	0.0194	0.0161	0.0196	0.014	0.2875	0.0173	0.0159	0.0174	0.6052	0.5689	0.0221	0.0125	0.0189	0.2783	0.0244	0.2561	0.0191
cg27026909	0.0634	0.0606	0.042	0.0409	0.0507	0.0326	0.0473	0.0518	0.0833	0.0427	0.072	0.0439	0.1353	0.0974	0.057	0.0876	0.0593	0.0527	0.0447	0.0973	0.0406	0.0795	0.0477	0.0616	0.0426	0.0421	0.0406	0.042	0.0391	0.0492	0.0583	0.044	0.0671	0.0721	0.0416	0.0509	0.0592	0.0613	0.0448	0.0542	0.0448	0.0513	0.0726	0.0725	0.0424	0.0499	0.0422	0.0637	0.0745
cg25025437	0.3721	0.3971	0.4367	0.0717	0.076	0.0266	0.0602	0.1289	0.1078	0.1016	0.0687	0.5482	0.0359	0.1318	0.0239	0.1135	0.4433	0.0344	0.4006	0.0331	0.4672	0.0422	0.4093	0.0517	0.4146	0.3608	0.0368	0.0674	0.0642	0.3496	0.2112	0.0406	0.0402	0.0508	0.0343	0.0437	0.2496	0.2245	0.0402	0.0754	0.09	0.2601	0.1182	0.0327	0.3362	0.1277	0.2082	0.1381	0.0885
cg02831294	0.8039	0.8351	0.8554	0.8033	0.7849	0.8592	0.7732	0.4571	0.8717	0.8315	0.5833	0.7623	0.4079	0.5975	0.7811	0.7974	0.4465	0.7751	0.7826	0.5728	0.8593	0.8375	0.816	0.8527	0.6755	0.5023	0.8118	0.7227	0.73	0.8478	0.8351	0.8178	0.7828	0.7968	0.5589	0.7444	0.7896	0.7989	0.7734	0.5414	0.6283	0.7257	0.8465	0.6922	0.6618	0.8136	0.8069	0.7097	0.4196
cg25599242	0.0272	0.0322	0.0481	0.0354	0.0283	0.0381	0.0549	0.0389	0.0502	0.0601	0.028	0.0325	0.0506	0.0352	0.033	0.0326	0.0321	0.1165	0.0386	0.0683	0.055	0.0779	0.0562	0.0902	0.0276	0.0371	0.0367	0.0314	0.0648	0.0291	0.036	0.0665	0.0906	0.0396	0.0881	0.0678	0.0354	0.0371	0.0279	0.0361	0.403	0.2281	0.0567	0.0471	0.0451	0.0713	0.0463	0.051	0.0299
cg27457941	0.0843	0.0686	0.0926	0.0375	0.0549	0.0394	0.0863	0.0638	0.0868	0.0976	0.0534	0.0813	0.1541	0.9416	0.0917	0.0492	0.0535	0.0477	0.0752	0.055	0.0641	0.0459	0.0952	0.0704	0.0732	0.0741	0.0551	0.0462	0.0342	0.0645	0.0583	0.0849	0.0881	0.0821	0.1533	0.0663	0.0667	0.0474	0.0448	0.1265	0.7457	0.6025	0.0637	0.0322	0.0787	0.0875	0.0825	0.1452	0.044
cg11007426	0.0707	0.2019	0.1908	0.0386	0.1363	0.1798	0.3921	0.0611	0.1362	0.4161	0.1977	0.1025	0.169	0.6466	0.2561	0.13	0.1894	0.3284	0.1469	0.0719	0.1035	0.1243	0.1639	0.1432	0.1732	0.3257	0.1924	0.2207	0.1236	0.1753	0.1776	0.1281	0.2423	0.1639	0.2415	0.1662	0.0924	0.263	0.1258	0.1221	0.5031	0.1437	0.1436	0.0674	0.11	0.1594	0.2268	0.0813	0.2326
cg06970956	0.0233	0.0271	0.0236	0.0279	0.0328	0.0225	0.0198	0.0245	0.048	0.0231	0.0622	0.0219	0.0449	0.0359	0.024	0.0493	0.0335	0.0258	0.024	0.0408	0.0197	0.036	0.0208	0.0312	0.0215	0.0205	0.0258	0.0276	0.0237	0.0233	0.0277	0.0255	0.024	0.0429	0.0251	0.0277	0.0336	0.0324	0.0243	0.0273	0.0231	0.0294	0.0298	0.0372	0.0241	0.0247	0.0197	0.0309	0.0414
cg14679230	0.8383	0.8697	0.9284	0.852	0.4595	0.8498	0.8784	0.0963	0.9111	0.8536	0.4519	0.6908	0.1418	0.1349	0.4062	0.6064	0.8476	0.1071	0.41	0.1429	0.9415	0.7874	0.301	0.8697	0.8076	0.3338	0.7463	0.4548	0.7416	0.5759	0.9151	0.7902	0.4581	0.8587	0.5785	0.9052	0.8274	0.8953	0.5731	0.1965	0.4129	0.8037	0.8416	0.2596	0.5111	0.6836	0.7779	0.1733	0.3299
cg09810818	0.3866	0.3967	0.369	0.1788	0.233	0.3004	0.4343	0.6086	0.469	0.4908	0.3969	0.2975	0.4098	0.4351	0.2848	0.3498	0.2998	0.695	0.4033	0.5682	0.3332	0.7027	0.6706	0.2504	0.205	0.4125	0.4601	0.5819	0.6706	0.6637	0.1179	0.478	0.4601	0.2844	0.3471	0.6831	0.4166	0.263	0.5522	0.6797	0.797	0.4674	0.7066	0.5269	0.3859	0.633	0.4381	0.5913	0.2645
cg20695334	0.0471	0.0588	0.071	0.0325	0.062	0.05	0.0855	0.0611	0.0516	0.0834	0.0646	0.0504	0.0727	0.0651	0.075	0.0551	0.0631	0.0465	0.0313	0.0777	0.061	0.0698	0.0833	0.0782	0.0537	0.0697	0.0521	0.0478	0.0503	0.0827	0.0775	0.0657	0.0604	0.0751	0.0463	0.0544	0.072	0.0621	0.0433	0.0808	0.0663	0.0648	0.0677	0.0466	0.0617	0.0674	0.0622	0.0676	0.0681
cg21043572	0.0482	0.0256	0.0293	0.0325	0.0325	0.0265	0.0327	0.0336	0.0264	0.027	0.0314	0.0261	0.0473	0.0413	0.0304	0.0273	0.0804	0.0211	0.0245	0.0305	0.0206	0.0337	0.0221	0.0337	0.092	0.0242	0.0285	0.0239	0.0527	0.0298	0.031	0.018	0.0247	0.0377	0.0369	0.0247	0.0365	0.0335	0.0336	0.0433	0.2148	0.1687	0.0302	0.0322	0.0198	0.03	0.0223	0.0339	0.0319
cg19880947	0.7431	0.6881	0.514	0.4126	0.6931	0.7507	0.6407	0.8287	0.8743	0.7858	0.7676	0.5809	0.7772	0.877	0.7474	0.755	0.8371	0.6408	0.4113	0.8045	0.8757	0.7188	0.6266	0.6918	0.4373	0.7103	0.6828	0.8019	0.7826	0.7175	0.9023	0.7563	0.6984	0.6629	0.5242	0.7515	0.828	0.8124	0.7486	0.7332	0.848	0.8167	0.7509	0.7	0.7278	0.7976	0.818	0.7085	0.7403
cg21846808	0.0392	0.0287	0.0433	0.0251	0.0215	0.031	0.0654	0.0346	0.0357	0.0402	0.0362	0.023	0.018	0.8864	0.0254	0.0259	0.1508	0.0291	0.0186	0.024	0.0381	0.0434	0.0316	0.021	0.0295	0.0237	0.0571	0.0433	0.0403	0.0823	0.0329	0.0346	0.2084	0.033	0.0149	0.0367	0.0504	0.0242	0.0244	0.0359	0.6518	0.6788	0.0427	0.0247	0.0375	0.0845	0.0472	0.282	0.0243
cg05264148	0.1408	0.0472	0.062	0.0332	0.0539	0.0698	0.2951	0.4005	0.033	0.2677	0.3335	0.0332	0.403	0.8527	0.1048	0.0661	0.4127	0.123	0.038	0.0366	0.0559	0.049	0.4428	0.351	0.0431	0.2824	0.0422	0.1235	0.0224	0.0612	0.1197	0.1477	0.2688	0.0292	0.304	0.0668	0.0313	0.0436	0.0692	0.5204	0.6846	0.6188	0.0608	0.047	0.1034	0.0985	0.0816	0.289	0.039
cg06177627	0.0282	0.0473	0.0389	0.0283	0.3344	0.0291	0.026	0.6444	0.7629	0.2357	0.3037	0.0282	0.6014	0.905	0.0472	0.0249	0.0216	0.0252	0.0303	0.0692	0.0301	0.0437	0.0412	0.0458	0.026	0.0327	0.0267	0.0473	0.0268	0.0398	0.0361	0.0459	0.4123	0.0452	0.1938	0.4648	0.0559	0.0384	0.0237	0.0697	0.6875	0.7266	0.0507	0.0384	0.0373	0.2568	0.1177	0.5067	0.0386
cg01620729	0.2714	0.0526	0.0551	0.0391	0.04	0.0295	0.0392	0.055	0.0383	0.0347	0.0516	0.0407	0.0345	0.0305	0.0644	0.0549	0.0348	0.0462	0.0389	0.0457	0.0366	0.0309	0.0366	0.0366	0.053	0.0528	0.0349	0.0434	0.0315	0.0229	0.042	0.0427	0.0443	0.0355	0.0373	0.044	0.0334	0.0413	0.0363	0.0348	0.0426	0.0395	0.0522	0.036	0.0437	0.0503	0.042	0.0728	0.0444
cg17516156	0.9112	0.9004	0.8751	0.8185	0.8679	0.848	0.8878	0.8899	0.8892	0.8463	0.8846	0.8302	0.8754	0.8602	0.8604	0.8513	0.8879	0.9196	0.8111	0.8789	0.8687	0.8	0.86	0.8996	0.8998	0.8351	0.8451	0.8373	0.8763	0.8891	0.8832	0.8716	0.8538	0.8972	0.8888	0.8804	0.8639	0.8941	0.8129	0.8525	0.8828	0.8995	0.885	0.8118	0.8129	0.8708	0.8812	0.8752	0.8554
cg16437134	0.82715	0.7881	0.883	0.6566	0.8233	0.6808	0.8327	0.6995	0.8306	0.9081	0.6528	0.7827	0.6565	0.6709	0.7082	0.8264	0.8705	0.8386	0.896	0.5524	0.7617	0.7826	0.8756	0.7228	0.82447	0.7483	0.8722	0.7572	0.4376	0.8971	0.8022	0.8382	0.8904	0.7687	0.7405	0.8226	0.7468	0.7624	0.6551	0.8115	0.8698	0.7922	0.7526	0.6508	0.7619	0.8521	0.8722	0.664	0.5958
cg23916948	0.0503	0.0444	0.04	0.0324	0.0397	0.0275	0.045	0.0585	0.0482	0.0677	0.048	0.0377	0.0346	0.0451	0.0481	0.0354	0.0435	0.0386	0.0448	0.0511	0.0456	0.0369	0.0534	0.0368	0.0434	0.0397	0.0289	0.0333	0.023	0.0258	0.0318	0.0418	0.0439	0.0407	0.0375	0.0646	0.0308	0.0315	0.0297	0.0286	0.0553	0.0443	0.0351	0.029	0.0516	0.0462	0.0475	0.0573	0.0326
cg00993140	0.8466	0.4018	0.5649	0.5531	0.5905	0.5388	0.1364	0.3965	0.0227	0.5981	0.0176	0.8076	0.4571	0.3912	0.0388	0.3309	0.0235	0.0374	0.4477	0.023	0.0416	0.0275	0.8444	0.6595	0.4203	0.4538	0.4403	0.0997	0.0565	0.1891	0.8664	0.5277	0.498	0.8324	0.5785	0.3425	0.505	0.6334	0.022	0.8369	0.0439	0.4034	0.5308	0.8361	0.2568	0.7815	0.0495	0.0341	0.8844
cg04162566	0.065	0.055	0.0447	0.0461	0.0629	0.0368	0.0637	0.0399	0.0407	0.0488	0.0665	0.0503	0.0545	0.0527	0.0307	0.0569	0.0481	0.034	0.0399	0.0452	0.0405	0.0415	0.0731	0.0521	0.0533	0.0524	0.0347	0.0591	0.0687	0.0467	0.0421	0.0438	0.0454	0.0537	0.1045	0.0461	0.0553	0.0526	0.0727	0.0354	0.0582	0.0402	0.0446	0.0381	0.0624	0.0529	0.0467	0.0469	0.0549
cg13947995	0.0347	0.026	0.0292	0.0189	0.0207	0.3159	0.03	0.0263	0.0209	0.0317	0.0304	0.0244	0.1645	0.9525	0.021	0.0236	0.1326	0.0539	0.0222	0.0258	0.023	0.029	0.3587	0.0453	0.0642	0.0359	0.0236	0.0264	0.0304	0.0288	0.3328	0.0316	0.3848	0.0293	0.5562	0.0221	0.0235	0.0609	0.0266	0.0602	0.838	0.8535	0.03	0.0218	0.0283	0.0361	0.0546	0.0499	0.1018
cg21049958	0.9086	0.3005	0.7068	0.3506	0.2535	0.6364	0.2497	0.2199	0.0862	0.3528	0.2292	0.3236	0.1599	0.0766	0.0676	0.3566	0.096	0.1638	0.3481	0.1559	0.2604	0.5477	0.4115	0.338	0.0878	0.3353	0.5716	0.5001	0.6596	0.2237	0.4925	0.3753	0.4438	0.2729	0.4098	0.438	0.544	0.4503	0.4699	0.1568	0.3436	0.3033	0.345	0.2715	0.2448	0.4718	0.5098	0.3086	0.2357
cg23457862	0.0985	0.0937	0.085	0.1106	0.2153	0.1152	0.132	0.1475	0.1082	0.1036	0.1033	0.0931	0.3908	0.9191	0.1323	0.105	0.2549	0.7728	0.0841	0.0787	0.0843	0.0771	0.1549	0.4523	0.2035	0.0766	0.0922	0.1019	0.1751	0.074	0.0764	0.0987	0.1973	0.1027	0.2163	0.0973	0.0701	0.1113	0.122	0.0905	0.8853	0.831	0.1341	0.1129	0.109	0.1946	0.0961	0.3228	0.0816
cg00109465	0.0349	0.0317	0.0444	0.0242	0.0317	0.0225	0.039	0.0304	0.0374	0.0316	0.0404	0.0388	0.0238	0.0211	0.0291	0.0392	0.0255	0.0286	0.0377	0.0202	0.0283	0.0276	0.0373	0.0276	0.0205	0.0321	0.0396	0.0343	0.0154	0.0224	0.0279	0.0344	0.0362	0.023	0.0264	0.0325	0.0181	0.0242	0.0194	0.0301	0.0242	0.018	0.0288	0.0279	0.0301	0.0398	0.0352	0.0303	0.029
cg16465560	0.02	0.0345	0.0639	0.0445	0.0326	0.0381	0.0423	0.0307	0.0279	0.0364	0.0243	0.0286	0.0254	0.0227	0.037	0.0403	0.0291	0.0347	0.0491	0.0265	0.0348	0.0228	0.0682	0.0246	0.019	0.0364	0.0358	0.0254	0.0231	0.0349	0.0387	0.0466	0.0368	0.0293	0.026	0.034	0.0233	0.0284	0.0182	0.0392	0.0408	0.0267	0.0316	0.019	0.0382	0.0425	0.0363	0.0369	0.0269
cg12311057	0.1901	0.0295	0.0276	0.0186	0.0202	0.0172	0.0959	0.0314	0.0286	0.0279	0.0153	0.0231	0.1602	0.9662	0.0232	0.0226	0.025	0.4819	0.0179	0.02	0.0248	0.0237	0.0307	0.0323	0.0344	0.0263	0.0207	0.0139	0.024	0.0207	0.0234	0.0222	0.035	0.0298	0.1452	0.0332	0.0269	0.0216	0.022	0.0237	0.062	0.7523	0.0266	0.0153	0.0319	0.0292	0.1133	0.0302	0.0217
cg18058279	0.8937	0.9063	0.9241	0.9273	0.9405	0.9346	0.9027	0.9065	0.9241	0.936	0.9442	0.9097	0.9361	0.9169	0.9338	0.9317	0.9256	0.9177	0.9227	0.9171	0.9306	0.9305	0.9321	0.9182	0.9015	0.9153	0.916	0.9212	0.9116	0.9421	0.9364	0.9408	0.9322	0.9323	0.9358	0.9256	0.9438	0.9243	0.9107	0.9305	0.9387	0.9441	0.9393	0.9182	0.9488	0.9459	0.9411	0.9092	0.9076
cg17410236	0.0216	0.0148	0.0152	0.0128	0.012	0.0097	0.0125	0.0171	0.0202	0.0122	0.0131	0.0133	0.0147	0.0138	0.0127	0.0157	0.0105	0.0113	0.0176	0.0151	0.0124	0.022	0.0209	0.0125	0.0336	0.014	0.0138	0.012	0.0181	0.0127	0.0115	0.0107	0.0119	0.0127	0.011	0.0146	0.0166	0.0105	0.0103	0.0116	0.0112	0.0116	0.0134	0.0114	0.0142	0.0156	0.0142	0.0144	0.0145
cg04323622	0.8603	0.851	0.9428	0.9149	0.8916	0.9103	0.9427	0.7992	0.8899	0.943	0.9081	0.9291	0.8867	0.9142	0.8903	0.8733	0.9267	0.903	0.9399	0.9133	0.9396	0.8754	0.9425	0.8966	0.8717	0.9399	0.9469	0.9135	0.8881	0.9365	0.9098	0.9402	0.9331	0.8882	0.9132	0.9303	0.8843	0.8937	0.9019	0.9345	0.9227	0.8054	0.8786	0.8292	0.9113	0.9312	0.938	0.7862	0.9062
cg03650397	0.0153	0.0175	0.017	0.0139	0.0132	0.015	0.0173	0.0188	0.0188	0.022	0.0156	0.0196	0.0166	0.6759	0.0149	0.0191	0.0155	0.0154	0.0192	0.0153	0.0206	0.0179	0.0196	0.0178	0.016	0.015	0.018	0.0173	0.0128	0.0148	0.0156	0.0245	0.0509	0.0131	0.0125	0.0223	0.0151	0.0147	0.015	0.0147	0.4463	0.666	0.0176	0.0146	0.0235	0.0199	0.0178	0.0197	0.0155
cg11323506	0.1617	0.4709	0.0913	0.0405	0.4383	0.0605	0.4786	0.0913	0.0238	0.4419	0.2424	0.0319	0.5239	0.9073	0.0564	0.0897	0.2645	0.9053	0.1334	0.8163	0.0515	0.2902	0.1119	0.2187	0.0233	0.2557	0.1361	0.3098	0.1403	0.4956	0.6082	0.2068	0.2657	0.0424	0.4688	0.0977	0.0314	0.0675	0.1207	0.4376	0.7482	0.7806	0.0885	0.0723	0.1248	0.4135	0.4325	0.509	0.1649
cg12532001	0.0457	0.0582	0.0336	0.0292	0.0291	0.024	0.0377	0.1074	0.0424	0.0398	0.038	0.0248	0.0327	0.054	0.0788	0.0575	0.0207	0.0237	0.0324	0.0241	0.035	0.0365	0.0269	0.0312	0.0426	0.0208	0.0235	0.03	0.0262	0.0333	0.0238	0.0331	0.0383	0.03	0.0353	0.0378	0.0241	0.0285	0.0282	0.0297	0.0368	0.2269	0.0271	0.0315	0.0377	0.0292	0.0359	0.1233	0.0394
cg01330670	0.0117	0.0135	0.0145	0.0091	0.01	0.0091	0.0122	0.3796	0.0098	0.0139	0.0076	0.013	0.0118	0.012	0.0123	0.013	0.0107	0.01	0.0127	0.0133	0.0144	0.0111	0.0125	0.0121	0.0102	0.0125	0.0125	0.0104	0.0084	0.0112	0.0117	0.012	0.0138	0.0131	0.0092	0.0147	0.0118	0.01	0.0109	0.0107	0.0132	0.0105	0.0118	0.0087	0.0122	0.0139	0.0135	0.0134	0.0116
cg23398173	0.1536	0.1273	0.0783	0.1644	0.4833	0.1336	0.1381	0.1602	0.1005	0.6215	0.213	0.0991	0.2682	0.1611	0.1157	0.1222	0.0838	0.8585	0.0705	0.2171	0.0915	0.1168	0.0738	0.1799	0.0464	0.0693	0.4743	0.4588	0.4236	0.2414	0.3543	0.1295	0.1976	0.2794	0.112	0.1032	0.3751	0.3047	0.1397	0.1803	0.1075	0.3341	0.1695	0.0666	0.0938	0.096	0.0954	0.1705	0.1624
cg10165585	0.0913	0.1583	0.0929	0.0386	0.055	0.0487	0.0456	0.0647	0.0421	0.2315	0.1281	0.0426	0.0609	0.937	0.0399	0.086	0.0977	0.117	0.0474	0.0503	0.0656	0.0802	0.1022	0.2103	0.0171	0.0668	0.0521	0.0923	0.1253	0.0698	0.5323	0.1512	0.3929	0.0405	0.2474	0.1019	0.1779	0.0663	0.046	0.093	0.6645	0.6829	0.0577	0.0281	0.1162	0.0669	0.069	0.1065	0.0964
cg02331902	0.0721	0.0525	0.0676	0.0682	0.0657	0.0547	0.0639	0.0651	0.0733	0.0508	0.0845	0.0418	0.0699	0.1571	0.044	0.0887	0.0497	0.0706	0.0406	0.07	0.0576	0.065	0.0573	0.0702	0.0414	0.0504	0.0383	0.0575	0.0668	0.0506	0.0577	0.0608	0.0678	0.0668	0.0746	0.0607	0.059	0.0692	0.0571	0.0586	0.3741	0.2092	0.0737	0.0601	0.0567	0.0589	0.0589	0.0658	0.0914
cg07732755	0.1585	0.0671	0.1526	0.0988	0.1691	0.1312	0.0929	0.1309	0.0463	0.1592	0.1792	0.0478	0.1088	0.8156	0.0564	0.0981	0.2578	0.1306	0.1483	0.0934	0.1161	0.1776	0.1937	0.237	0.1735	0.1286	0.1006	0.1565	0.1252	0.0816	0.4226	0.1609	0.1951	0.0559	0.2259	0.1516	0.0433	0.057	0.1226	0.0685	0.6622	0.6658	0.106	0.0471	0.1058	0.143	0.2556	0.2066	0.1924
cg19689828	0.186	0.2489	0.089	0.1193	0.1075	0.1816	0.0856	0.2421	0.3164	0.1028	0.1037	0.0562	0.1439	0.3312	0.1436	0.1784	0.4581	0.1155	0.0903	0.1669	0.1691	0.0925	0.0685	0.1557	0.11357	0.2219	0.1195	0.2928	0.2415	0.0525	0.0685	0.4284	0.1686	0.0986	0.4232	0.0921	0.1642	0.1385	0.1403	0.0765	0.7131	0.6322	0.1413	0.0802	0.0782	0.1292	0.1566	0.2832	0.2374
cg02242894	0.9269	0.9082	0.8991	0.9174	0.9282	0.9398	0.8906	0.6021	0.9121	0.903	0.87	0.8789	0.9254	0.8843	0.8431	0.9111	0.9258	0.86	0.8969	0.6801	0.9429	0.9273	0.9133	0.9352	0.9263	0.9059	0.9314	0.902	0.9188	0.9279	0.9188	0.9463	0.9129	0.9613	0.9066	0.9258	0.9454	0.9429	0.8926	0.9318	0.9207	0.9315	0.9284	0.9215	0.9161	0.9309	0.8942	0.8921	0.6648
cg04279596	0.0424	0.0239	0.0164	0.014	0.013	0.0137	0.0206	0.0262	0.0157	0.0183	0.0161	0.0178	0.02	0.0182	0.0204	0.0208	0.0126	0.0116	0.0183	0.0175	0.0199	0.023	0.0166	0.0215	0.0346	0.0179	0.0183	0.0156	0.0156	0.0184	0.02	0.0182	0.0165	0.0178	0.0162	0.0163	0.0178	0.0191	0.0144	0.0163	0.0199	0.0127	0.0189	0.0196	0.0138	0.0201	0.0159	0.0378	0.0178
cg25431220	0.0179	0.0344	0.0274	0.0164	0.0188	0.0164	0.0224	0.0267	0.0163	0.0257	0.0199	0.0191	0.0189	0.3883	0.0215	0.0268	0.0176	0.0144	0.0221	0.0162	0.0276	0.0239	0.0205	0.0173	0.0142	0.0161	0.0205	0.0226	0.0177	0.0197	0.0173	0.0258	0.0288	0.0218	0.0167	0.0248	0.0289	0.0179	0.0183	0.0168	0.2077	0.0757	0.019	0.0192	0.0205	0.0212	0.0257	0.0482	0.0167
cg05976753	0.0497	0.0418	0.0317	0.0469	0.0216	0.0363	0.0474	0.065	0.0592	0.0855	0.0645	0.0468	0.0416	0.7284	0.0432	0.0848	0.2505	0.1104	0.0304	0.0388	0.0358	0.0338	0.0773	0.0404	0.0276	0.0531	0.0414	0.0701	0.0506	0.0318	0.0322	0.0834	0.1543	0.0487	0.0297	0.0554	0.0313	0.026	0.069	0.0347	0.7381	0.7276	0.0443	0.0282	0.0597	0.0433	0.0672	0.1269	0.0307
cg25785679	0.0174	0.0144	0.0172	0.0166	0.0175	0.0173	0.0198	0.0151	0.0199	0.0187	0.0223	0.0161	0.0246	0.0335	0.0146	0.0224	0.0183	0.0157	0.0164	0.0228	0.0182	0.0217	0.0207	0.0232	0.0159	0.0153	0.0169	0.0191	0.0177	0.0236	0.0316	0.02	0.0167	0.0242	0.0192	0.0172	0.0221	0.0219	0.0172	0.0306	0.0215	0.0195	0.0222	0.019	0.0189	0.0163	0.0175	0.0162	0.0265
cg12191422	0.0759	0.0689	0.0635	0.0405	0.0953	0.073	0.1731	0.0554	0.0668	0.0735	0.2245	0.0802	0.0919	0.0718	0.1427	0.0483	0.4097	0.1969	0.0527	0.0481	0.0557	0.0581	0.1091	0.2061	0.0708	0.0664	0.0707	0.0883	0.0601	0.0634	0.335	0.0917	0.0774	0.0693	0.0826	0.0689	0.0545	0.1232	0.0444	0.159	0.1766	0.1688	0.1133	0.0445	0.0712	0.1409	0.147	0.132	0.1
cg24754689	0.7543	0.7316	0.8809	0.7347	0.8115	0.9014	0.6106	0.7048	0.8844	0.8739	0.8783	0.7735	0.7149	0.2407	0.7502	0.7707	0.9347	0.3991	0.7964	0.5434	0.8231	0.742	0.862	0.925	0.8826	0.7963	0.8508	0.8626	0.9059	0.5934	0.8507	0.8773	0.6891	0.8411	0.8047	0.8524	0.785	0.8855	0.7592	0.5562	0.6693	0.6587	0.9107	0.6564	0.8475	0.8967	0.819	0.6777	0.6463
cg01766065	0.0244	0.0234	0.0209	0.0121	0.0127	0.0116	0.0248	0.0225	0.0113	0.0284	0.014	0.0153	0.0153	0.015	0.0221	0.0144	0.0168	0.0159	0.0152	0.015	0.0235	0.0154	0.0179	0.0213	0.0654	0.019	0.0162	0.0147	0.02	0.0135	0.0128	0.0255	0.0241	0.0164	0.015	0.0192	0.0152	0.0105	0.0133	0.0119	0.0154	0.013	0.0166	0.0127	0.0188	0.02	0.0179	0.0277	0.0147
cg23982678	0.0283	0.063	0.0486	0.0243	0.0251	0.0291	0.0546	0.0724	0.0452	0.056	0.1773	0.0356	0.077	0.0584	0.0851	0.034	0.0441	0.0425	0.0521	0.0554	0.036	0.065	0.0498	0.0754	0.0473	0.0527	0.0557	0.023	0.0358	0.0585	0.0505	0.0493	0.0651	0.0634	0.0317	0.0481	0.0626	0.0565	0.0329	0.0672	0.0412	0.0544	0.0562	0.0273	0.0408	0.0693	0.0426	0.0497	0.0586
cg10874111	0.6576	0.93	0.9445	0.8113	0.7008	0.9143	0.8269	0.2349	0.6461	0.9442	0.557	0.944	0.5868	0.2857	0.6833	0.5112	0.8503	0.7941	0.7204	0.4491	0.9371	0.8775	0.2973	0.9288	0.929	0.5255	0.9129	0.6022	0.901	0.6796	0.9232	0.8008	0.5503	0.7428	0.7917	0.9247	0.8293	0.8771	0.7655	0.3025	0.8784	0.9062	0.8831	0.1611	0.5365	0.8143	0.9385	0.4267	0.2432
cg08508814	0.0908	0.101	0.0637	0.0674	0.0953	0.1235	0.4652	0.1553	0.0825	0.0767	0.564	0.0497	0.0787	0.6495	0.0923	0.1017	0.1072	0.3679	0.0416	0.0888	0.0637	0.1031	0.1022	0.0929	0.0318	0.0524	0.0601	0.1081	0.0767	0.0847	0.0837	0.2302	0.0792	0.1066	0.1271	0.0699	0.1296	0.0695	0.0806	0.4159	0.6344	0.7123	0.0864	0.0727	0.0648	0.0626	0.2866	0.3686	0.1509
cg25839562	0.0939	0.0496	0.0857	0.0738	0.0649	0.0881	0.0826	0.0509	0.1165	0.1141	0.1	0.0533	0.0602	0.2588	0.0336	0.0709	0.0738	0.0437	0.0698	0.155	0.0796	0.0923	0.082	0.0669	0.0285	0.0399	0.0698	0.0564	0.0437	0.0587	0.063	0.106	0.0969	0.1051	0.0397	0.0839	0.0634	0.0592	0.0624	0.055	0.2284	0.0998	0.0687	0.0381	0.076	0.101	0.079	0.0591	0.0406
cg25323057	0.6115	0.2374	0.118	0.0758	0.7843	0.1418	0.6006	0.4802	0.3661	0.2694	0.3248	0.733	0.2743	0.6829	0.2899	0.1184	0.6376	0.8883	0.0897	0.2278	0.089	0.1391	0.3885	0.2808	0.7848	0.1429	0.0867	0.3063	0.2533	0.4735	0.2045	0.3928	0.3224	0.227	0.8242	0.122	0.1691	0.7402	0.1901	0.7706	0.8257	0.835	0.6024	0.1085	0.1435	0.6718	0.5486	0.6858	0.6678
cg27318539	0.5315	0.7644	0.8129	0.7927	0.7846	0.822	0.7714	0.5134	0.8271	0.8124	0.7851	0.6582	0.5187	0.5274	0.6672	0.7053	0.5113	0.5209	0.6807	0.5769	0.8435	0.6754	0.6181	0.7738	0.7148	0.5731	0.7104	0.7398	0.8491	0.7471	0.7294	0.7101	0.5866	0.7503	0.4986	0.805	0.7364	0.7807	0.6257	0.3679	0.4665	0.4736	0.7869	0.5646	0.6043	0.8228	0.8068	0.6839	0.517
cg13627097	0.0564	0.0633	0.0505	0.0369	0.0447	0.0385	0.0543	0.0561	0.0663	0.0642	0.063	0.0489	0.0794	0.0663	0.057	0.0601	0.1322	0.0368	0.0478	0.0627	0.0732	0.0701	0.0581	0.0658	0.043	0.0529	0.0518	0.0412	0.0414	0.0586	0.0522	0.0424	0.0697	0.0552	0.0626	0.0592	0.0524	0.0468	0.0259	0.0551	0.068	0.0549	0.0955	0.0408	0.052	0.0688	0.059	0.0866	0.0931
cg19455322	0.2598	0.0413	0.0381	0.0232	0.0608	0.0386	0.025	0.0279	0.0331	0.0284	0.0229	0.0233	0.0242	0.9576	0.029	0.0196	0.0335	0.0908	0.0236	0.0363	0.0242	0.0265	0.0365	0.2093	0.0631	0.0285	0.0263	0.0186	0.0202	0.1629	0.0296	0.0314	0.0478	0.028	0.0295	0.0195	0.0246	0.0265	0.0221	0.0554	0.8619	0.8195	0.063	0.0187	0.0197	0.0332	0.0287	0.0333	0.033
cg17954165	0.0233	0.029	0.027	0.0226	0.0208	0.0172	0.0248	0.1214	0.0207	0.0373	0.0202	0.0216	0.0275	0.0186	0.0199	0.028	0.0325	0.0214	0.0219	0.0249	0.0292	0.0189	0.0353	0.019	0.0197	0.018	0.0255	0.0212	0.0198	0.0312	0.029	0.0296	0.0259	0.0332	0.0202	0.0298	0.0262	0.0202	0.0248	0.0253	0.0382	0.0185	0.0234	0.0183	0.0334	0.0296	0.0443	0.0237	0.0244
cg15869492	0.2923	0.3362	0.0639	0.0779	0.2917	0.0981	0.2026	0.0658	0.5319	0.1096	0.683	0.0702	0.3775	0.3443	0.1992	0.0922	0.3087	0.0604	0.0335	0.0644	0.0409	0.1158	0.1647	0.4115	0.3825	0.1175	0.2772	0.1227	0.1104	0.3361	0.3268	0.2221	0.2218	0.1891	0.183	0.1437	0.1312	0.4105	0.0835	0.3683	0.7819	0.5871	0.2184	0.1195	0.202	0.285	0.228	0.3192	0.0812
cg11495854	0.047	0.0734	0.0562	0.0324	0.0513	0.0465	0.0552	0.1391	0.1013	0.0584	0.0645	0.0452	0.0558	0.0844	0.0874	0.0812	0.0508	0.0469	0.0361	0.0675	0.0545	0.0796	0.0522	0.0729	0.0461	0.0403	0.0418	0.037	0.0691	0.0733	0.0628	0.0503	0.0558	0.057	0.0405	0.054	0.0535	0.076	0.0406	0.0688	0.0481	0.0634	0.0752	0.045	0.0672	0.0719	0.0462	0.0949	0.1029
cg26266098	0.0792	0.1443	0.1505	0.1902	0.2563	0.1398	0.2154	0.1281	0.3506	0.2249	0.1375	0.2556	0.2632	0.6406	0.1956	0.3541	0.1826	0.1195	0.1446	0.3401	0.1715	0.1933	0.1293	0.2304	0.19285	0.1565	0.1444	0.1459	0.1322	0.282	0.2257	0.1635	0.1519	0.2101	0.1054	0.1789	0.1553	0.3405	0.1123	0.2364	0.817	0.7155	0.2581	0.1796	0.1689	0.2555	0.1503	0.1717	0.1907
cg03558408	0.028	0.0347	0.056	0.0309	0.0345	0.0231	0.0417	0.0728	0.0282	0.0421	0.0324	0.0299	0.0416	0.0472	0.0333	0.0358	0.0311	0.0243	0.0258	0.0608	0.0422	0.0506	0.0512	0.0599	0.0243	0.0361	0.0411	0.0273	0.0278	0.0477	0.0682	0.0344	0.0462	0.0605	0.0262	0.046	0.0564	0.0431	0.027	0.0438	0.0548	0.0293	0.0456	0.0231	0.0455	0.052	0.0382	0.0528	0.0525
cg16643603	0.8435	0.7991	0.8446	0.8233	0.8557	0.9055	0.9028	0.8719	0.8447	0.9052	0.9156	0.8752	0.707	0.8551	0.9065	0.8837	0.9083	0.9157	0.7892	0.7101	0.8781	0.8735	0.9285	0.8432	0.8153	0.5074	0.7365	0.7186	0.5739	0.902	0.8902	0.8859	0.8811	0.8885	0.9073	0.8188	0.6951	0.8722	0.6431	0.8965	0.8924	0.8451	0.8291	0.8679	0.8735	0.9363	0.8721	0.8605	0.8575
cg10220595	0.0207	0.0269	0.0586	0.0237	0.0339	0.02	0.0408	0.0315	0.0224	0.0418	0.0218	0.0661	0.0283	0.0287	0.0268	0.0307	0.0312	0.0235	0.0398	0.0284	0.0524	0.0288	0.0405	0.0279	0.0128	0.0349	0.041	0.0302	0.0229	0.0348	0.0274	0.049	0.0486	0.027	0.0199	0.041	0.028	0.0349	0.021	0.036	0.0342	0.0283	0.0413	0.0263	0.0624	0.0454	0.0435	0.0319	0.0285
cg07441565	0.0407	0.0275	0.0273	0.0379	0.0319	0.0273	0.0249	0.0266	0.0224	0.0226	0.0297	0.0276	0.0324	0.0236	0.0296	0.0264	0.0275	0.0232	0.0214	0.0321	0.0246	0.0269	0.0202	0.0352	0.02588	0.0281	0.0243	0.0255	0.0317	0.0317	0.0323	0.0228	0.0181	0.0351	0.0186	0.0237	0.0313	0.0329	0.0304	0.0338	0.1266	0.0217	0.0327	0.0292	0.0212	0.0206	0.0293	0.0258	0.0351
cg20490031	0.8756	0.9185	0.9203	0.698	0.9401	0.9454	0.851	0.6429	0.8897	0.9516	0.4908	0.8364	0.3819	0.797	0.0881	0.9244	0.9233	0.7309	0.7148	0.4607	0.9453	0.9393	0.7321	0.9401	0.88	0.8983	0.8962	0.8873	0.9312	0.6284	0.918	0.8864	0.57	0.9395	0.6833	0.884	0.9251	0.928	0.9197	0.3831	0.8854	0.9165	0.8855	0.8589	0.8752	0.8946	0.8375	0.8841	0.631
cg12394201	0.7572	0.4282	0.5389	0.8758	0.5964	0.3854	0.7764	0.5859	0.6364	0.6729	0.8119	0.6848	0.6868	0.8942	0.8741	0.4814	0.9289	0.5965	0.3802	0.8471	0.7167	0.2274	0.5761	0.5247	0.8026	0.4292	0.2923	0.5211	0.4529	0.5185	0.6644	0.5417	0.7571	0.6245	0.6749	0.6881	0.4348	0.7293	0.345	0.7237	0.9395	0.864	0.7711	0.7722	0.7127	0.6341	0.5093	0.7534	0.7224
cg25572812	0.0361	0.078	0.0377	0.0417	0.0357	0.035	0.0358	0.079	0.0505	0.0431	0.0316	0.0319	0.0829	0.0712	0.0511	0.068	0.0502	0.0275	0.0324	0.051	0.0371	0.0552	0.0341	0.0666	0.0581	0.0317	0.0273	0.035	0.0311	0.0343	0.0482	0.0394	0.0407	0.0938	0.0358	0.0389	0.0471	0.0517	0.037	0.0416	0.0393	0.0668	0.0624	0.0326	0.0373	0.0391	0.0365	0.082	0.0519
cg09512080	0.5761	0.4815	0.4387	0.5398	0.4169	0.631	0.5267	0.6306	0.4332	0.5645	0.4038	0.3603	0.3812	0.6214	0.3818	0.3606	0.913	0.5108	0.4497	0.5119	0.5445	0.5915	0.6482	0.598	0.1156	0.5029	0.5079	0.4924	0.4881	0.6367	0.6238	0.4041	0.5439	0.5863	0.4801	0.4487	0.5258	0.4878	0.5316	0.656	0.4751	0.4743	0.6253	0.5326	0.4258	0.3893	0.4697	0.4062	0.4451
cg19245943	0.0339	0.0289	0.0342	0.0313	0.0356	0.0268	0.0338	0.0301	0.0349	0.0328	0.0401	0.0282	0.0494	0.0743	0.0348	0.0408	0.0277	0.0302	0.0318	0.0402	0.027	0.0515	0.0396	0.0405	0.0258	0.0289	0.0351	0.0354	0.0334	0.0345	0.0756	0.036	0.0335	0.0506	0.037	0.0357	0.0449	0.0436	0.037	0.0376	0.0337	0.0321	0.0447	0.048	0.0312	0.0331	0.0344	0.0392	0.0595
cg04092231	0.0254	0.0311	0.0375	0.0448	0.03	0.0238	0.0378	0.0299	0.0196	0.1321	0.0219	0.021	0.038	0.3085	0.0289	0.0267	0.0479	0.0282	0.0247	0.0262	0.0473	0.0385	0.067	0.0962	0.0234	0.0224	0.0484	0.0434	0.0306	0.0293	0.0569	0.0496	0.0978	0.0243	0.1026	0.0434	0.0298	0.0263	0.0245	0.0277	0.1735	0.0681	0.0301	0.0235	0.1008	0.0608	0.0401	0.2183	0.0237
cg08902818	0.3961	0.3433	0.4007	0.3827	0.4206	0.1632	0.1557	0.0537	0.0911	0.302	0.1116	0.4406	0.1797	0.5867	0.0834	0.4212	0.4084	0.1586	0.0613	0.0857	0.1073	0.1016	0.0941	0.194	0.3563	0.2804	0.0777	0.0917	0.0827	0.1661	0.119	0.5079	0.4502	0.4533	0.19	0.0974	0.2295	0.1587	0.0863	0.1277	0.781	0.3987	0.6727	0.12	0.4616	0.1151	0.1542	0.093	0.5961
cg19857361	0.9322	0.9165	0.9044	0.9377	0.9297	0.9489	0.9361	0.9216	0.9348	0.944	0.9462	0.9199	0.9385	0.9543	0.9173	0.9114	0.9449	0.9209	0.893	0.9389	0.9409	0.9273	0.9467	0.9463	0.8935	0.9162	0.9126	0.941	0.9135	0.9549	0.938	0.9548	0.9473	0.9092	0.9481	0.9305	0.9454	0.9296	0.9442	0.9484	0.9543	0.9472	0.95	0.9493	0.9466	0.9372	0.9453	0.9259	0.9472
cg01601050	0.0547	0.0547	0.0713	0.0298	0.0445	0.2723	0.3417	0.0458	0.0626	0.0583	0.4258	0.0529	0.1179	0.0768	0.1722	0.0666	0.0468	0.0457	0.0433	0.1125	0.0441	0.0834	0.1335	0.0709	0.0378	0.041	0.0349	0.0558	0.0353	0.1404	0.0851	0.0416	0.0823	0.0623	0.0932	0.0617	0.1322	0.2241	0.039	0.1116	0.5771	0.1195	0.0843	0.0364	0.0608	0.1014	0.2961	0.1172	0.224
cg16603964	0.2951	0.0239	0.0481	0.0141	0.0152	0.0188	0.0395	0.023	0.0323	0.0234	0.0163	0.0352	0.0141	0.0173	0.022	0.0506	0.0128	0.0135	0.0284	0.0126	0.0395	0.0191	0.0387	0.0224	0.043	0.0253	0.0247	0.0169	0.0169	0.0138	0.0156	0.0158	0.0332	0.0125	0.0122	0.0308	0.0153	0.0196	0.0237	0.0164	0.0159	0.0185	0.0275	0.0167	0.0176	0.0247	0.0355	0.0224	0.0201
cg08433293	0.5183	0.6327	0.6254	0.6094	0.6906	0.6759	0.674	0.721	0.5342	0.6167	0.6575	0.735	0.7272	0.8051	0.6527	0.4249	0.7629	0.7832	0.2804	0.8165	0.272	0.591	0.724	0.6617	0.5958	0.6214	0.5737	0.6294	0.5429	0.5353	0.805	0.5993	0.518	0.6315	0.5355	0.602	0.5128	0.6638	0.4625	0.7422	0.7678	0.6669	0.7096	0.6414	0.5336	0.7021	0.5914	0.7008	0.722
cg17926950	0.071	0.0607	0.0597	0.0772	0.0816	0.0502	0.2137	0.0763	0.0704	0.0836	0.1057	0.0643	0.2951	0.9395	0.0677	0.0863	0.0708	0.0792	0.0695	0.0696	0.0514	0.1791	0.0661	0.1166	0.0671	0.254	0.048	0.0861	0.079	0.3069	0.322	0.2827	0.1341	0.0786	0.1859	0.076	0.1055	0.0969	0.0738	0.0739	0.8629	0.6299	0.0916	0.0647	0.0633	0.1132	0.1498	0.0964	0.2019
cg23609811	0.0425	0.0274	0.0275	0.0236	0.0201	0.0313	0.0341	0.2426	0.0393	0.0298	0.0242	0.0244	0.0282	0.0286	0.1189	0.0296	0.0383	0.0293	0.0327	0.1506	0.0269	0.0331	0.035	0.0391	0.023	0.0246	0.0238	0.029	0.0274	0.0311	0.0492	0.0427	0.0338	0.0362	0.0408	0.0359	0.0322	0.0411	0.0227	0.0289	0.0263	0.0246	0.0355	0.0193	0.0242	0.0321	0.0303	0.0422	0.0686
cg22827001	0.1101	0.0443	0.0536	0.042	0.0383	0.0387	0.0572	0.0755	0.0631	0.0618	0.0498	0.0469	0.0815	0.0593	0.0399	0.0574	0.0589	0.0424	0.043	0.0589	0.0531	0.057	0.0577	0.0525	0.0441	0.0333	0.0384	0.0389	0.0363	0.0461	0.0557	0.0546	0.0527	0.0578	0.0378	0.0493	0.069	0.0392	0.0384	0.0405	0.0521	0.0416	0.0579	0.0539	0.0688	0.0526	0.0616	0.0623	0.0667
cg06942450	0.8999	0.8495	0.8572	0.8884	0.8756	0.9045	0.8901	0.8149	0.9243	0.9034	0.8246	0.8614	0.8962	0.8854	0.9276	0.8052	0.9208	0.9048	0.7343	0.869	0.8631	0.8819	0.8578	0.9041	0.8773	0.8438	0.8016	0.848	0.8657	0.911	0.8781	0.8469	0.8859	0.9081	0.9402	0.8406	0.8977	0.9308	0.6351	0.8853	0.9042	0.8726	0.9141	0.8587	0.8895	0.8665	0.8729	0.8319	0.8599
cg25917853	0.1017	0.1716	0.069	0.0739	0.0735	0.1265	0.0665	0.1535	0.2092	0.2433	0.4038	0.0772	0.1242	0.3972	0.0828	0.3005	0.198	0.0925	0.0719	0.0816	0.0569	0.0955	0.0936	0.3679	0.1582	0.0461	0.0643	0.0959	0.133	0.0572	0.063	0.062	0.0862	0.1026	0.171	0.061	0.2092	0.1632	0.0891	0.086	0.8943	0.7337	0.2116	0.1292	0.1054	0.0677	0.1	0.2798	0.2026
cg11079635	0.606	0.8676	0.9253	0.8849	0.475	0.9265	0.8953	0.6287	0.8509	0.8084	0.6141	0.8871	0.7427	0.7351	0.8905	0.5933	0.2505	0.7191	0.9046	0.8906	0.937	0.8714	0.9238	0.8946	0.7771	0.8885	0.913	0.9299	0.8822	0.9251	0.9124	0.9413	0.9375	0.8807	0.9098	0.9077	0.8602	0.8911	0.7314	0.904	0.7127	0.9173	0.8821	0.4089	0.914	0.9308	0.7679	0.8085	0.8582
cg19165274	0.6499	0.498	0.4801	0.603	0.6539	0.5603	0.4492	0.8379	0.9227	0.4383	0.5359	0.7664	0.7996	0.9365	0.9476	0.5623	0.844	0.9394	0.588	0.8927	0.4563	0.6595	0.7258	0.6741	0.7818	0.6078	0.5168	0.4534	0.2666	0.7106	0.9055	0.4307	0.532	0.7639	0.4653	0.4536	0.3927	0.3684	0.3597	0.5139	0.8084	0.701	0.7134	0.5733	0.5552	0.6616	0.2797	0.5832	0.4258
cg05916662	0.0258	0.03	0.0222	0.0225	0.0235	0.023	0.0266	0.0289	0.0289	0.0265	0.0219	0.0245	0.034	0.0378	0.0264	0.0368	0.0225	0.0219	0.021	0.0314	0.0249	0.0438	0.0245	0.0366	0.0205	0.0252	0.024	0.023	0.02	0.0375	0.0333	0.0226	0.0262	0.0435	0.0218	0.0273	0.0345	0.0317	0.0231	0.0335	0.0309	0.0217	0.0356	0.0184	0.0236	0.0278	0.0238	0.0288	0.0374
cg19668234	0.4125	0.5167	0.5866	0.1448	0.5002	0.3478	0.2543	0.4563	0.2063	0.2182	0.3971	0.7587	0.1343	0.1408	0.3543	0.5969	0.457	0.2766	0.1509	0.2498	0.5931	0.5851	0.3045	0.7297	0.3846	0.2302	0.3537	0.347	0.501	0.5846	0.3501	0.2266	0.5201	0.1971	0.3671	0.3005	0.6097	0.653	0.5324	0.5695	0.4564	0.1017	0.2858	0.1452	0.1542	0.5804	0.2524	0.4338	0.1025
cg07327468	0.4729	0.3354	0.5074	0.7699	0.5896	0.6609	0.7527	0.6659	0.3129	0.6234	0.6127	0.402	0.5566	0.9364	0.8688	0.2526	0.8559	0.7871	0.1793	0.688	0.4537	0.6317	0.7001	0.6526	0.752	0.5446	0.4373	0.4056	0.3439	0.7813	0.9218	0.4594	0.6379	0.095	0.5989	0.5059	0.4507	0.2287	0.3914	0.6675	0.7951	0.794	0.2527	0.794	0.444	0.7013	0.5899	0.7402	0.8605
cg02332982	0.0212	0.0338	0.0256	0.0157	0.0172	0.0173	0.0229	0.0234	0.0182	0.0206	0.0249	0.02	0.0181	0.0241	0.0177	0.0294	0.329	0.0162	0.0236	0.018	0.0245	0.023	0.0234	0.0178	0.0202	0.0196	0.0209	0.0197	0.0198	0.0187	0.0189	0.0274	0.0254	0.0185	0.0154	0.0237	0.1269	0.019	0.02	0.0197	0.4294	0.0229	0.0172	0.0148	0.0224	0.0259	0.0198	0.0275	0.0192
cg03068637	0.0451	0.031	0.0419	0.0211	0.0249	0.023	0.0425	0.0508	0.0299	0.0412	0.0217	0.0277	0.0218	0.0246	0.0319	0.0292	0.0308	0.0224	0.0334	0.0322	0.0332	0.0213	0.0289	0.0208	0.0125	0.029	0.0246	0.024	0.0149	0.0234	0.0278	0.0346	0.0457	0.0226	0.0226	0.036	0.0209	0.0277	0.0223	0.019	0.0426	0.0235	0.0209	0.018	0.0286	0.0298	0.0577	0.0279	0.042
cg00022558	0.1002	0.1022	0.1402	0.4527	0.0688	0.0861	0.1352	0.3264	0.1038	0.1896	0.1045	0.3975	0.0657	0.1041	0.0418	0.1976	0.099	0.0841	0.1983	0.0866	0.4875	0.0834	0.2405	0.2539	0.0824	0.3349	0.0923	0.0919	0.1112	0.0657	0.1091	0.1117	0.119	0.0989	0.0549	0.1115	0.2543	0.4935	0.212	0.0737	0.1779	0.0554	0.0793	0.0596	0.1262	0.4972	0.1154	0.158	0.4913
cg10950028	0.5885	0.2892	0.456	0.0325	0.371	0.7539	0.5369	0.2127	0.3909	0.3647	0.5992	0.35	0.767	0.7039	0.498	0.2143	0.8091	0.417	0.4267	0.452	0.4886	0.7368	0.4306	0.4585	0.2648	0.3244	0.1679	0.7072	0.066	0.3977	0.3586	0.2443	0.4321	0.839	0.7919	0.2586	0.1326	0.3669	0.2401	0.214	0.7139	0.7593	0.726	0.2916	0.5038	0.8704	0.4519	0.4886	0.4174
cg23433527	0.0259	0.0133	0.0133	0.0104	0.0097	0.0095	0.0124	0.0177	0.0131	0.0154	0.018	0.0147	0.0117	0.0123	0.0159	0.0132	0.0141	0.0125	0.0166	0.0116	0.0161	0.0117	0.0159	0.0147	0.0849	0.0169	0.0154	0.0097	0.0246	0.0156	0.0112	0.0122	0.0135	0.0125	0.0094	0.0135	0.0129	0.0118	0.012	0.013	0.0237	0.1177	0.0121	0.0083	0.0098	0.0133	0.015	0.0189	0.0148
cg20226154	0.0606	0.0486	0.0518	0.0461	0.045	0.0754	0.0372	0.0287	0.0529	0.0864	0.0745	0.0382	0.0507	0.0503	0.0272	0.057	0.2354	0.035	0.0351	0.0454	0.0619	0.0543	0.0524	0.0578	0.0266	0.0297	0.041	0.0586	0.1054	0.0442	0.05	0.0419	0.0741	0.0483	0.0507	0.0527	0.0592	0.1025	0.0443	0.0419	0.5293	0.4707	0.0768	0.0578	0.0394	0.039	0.0431	0.0432	0.0713
cg10069323	0.4456	0.5618	0.5402	0.3001	0.449	0.3266	0.5693	0.1926	0.4267	0.4479	0.2417	0.5593	0.2216	0.1104	0.1351	0.3611	0.1966	0.1471	0.4785	0.1693	0.6886	0.5931	0.3142	0.584	0.1913	0.4393	0.5588	0.3384	0.5047	0.4516	0.4228	0.4059	0.3392	0.3217	0.3199	0.5811	0.478	0.7485	0.3835	0.2162	0.7147	0.717	0.5409	0.1948	0.2627	0.5278	0.5743	0.2802	0.1829
cg23629561	0.5979	0.5146	0.6111	0.5632	0.4126	0.6786	0.5435	0.3817	0.5863	0.6064	0.5622	0.5614	0.5734	0.5159	0.4946	0.5936	0.6068	0.5022	0.5884	0.4177	0.6093	0.562	0.5155	0.6204	0.5195	0.4913	0.5935	0.5649	0.7218	0.5187	0.5759	0.607	0.5035	0.5927	0.5698	0.6004	0.5865	0.6864	0.532	0.5206	0.6133	0.5756	0.6294	0.49	0.5071	0.5793	0.5984	0.5382	0.5101
cg14633504	0.1172	0.0426	0.0304	0.034	0.0355	0.0389	0.0425	0.1791	0.0405	0.0479	0.057	0.0334	0.0494	0.2538	0.0404	0.0384	0.0417	0.0322	0.0238	0.0253	0.0335	0.0413	0.0419	0.0293	0.055	0.0282	0.0356	0.0472	0.0227	0.0221	0.0355	0.0307	0.0387	0.0716	0.0327	0.0377	0.0259	0.0328	0.0336	0.028	0.499	0.4513	0.0371	0.028	0.033	0.0375	0.0329	0.0535	0.04
cg23334365	0.2409	0.2106	0.1071	0.0267	0.0815	0.0755	0.1469	0.1659	0.0279	0.1595	0.0616	0.3999	0.1367	0.8772	0.1485	0.022	0.2525	0.063	0.0816	0.0741	0.0994	0.0355	0.1963	0.4036	0.186	0.1965	0.0788	0.1122	0.0261	0.1178	0.0781	0.1537	0.329	0.0449	0.2279	0.0882	0.0441	0.0867	0.1768	0.2368	0.764	0.6701	0.3365	0.0273	0.134	0.1715	0.3875	0.2075	0.0447
cg04019128	0.074	0.0524	0.1517	0.0458	0.5073	0.068	0.1154	0.062	0.0685	0.1089	0.1239	0.0903	0.1351	0.7705	0.0582	0.0605	0.165	0.0591	0.0921	0.0973	0.1119	0.0444	0.4033	0.0929	0.032	0.0983	0.0788	0.0562	0.0553	0.057	0.054	0.0983	0.1387	0.0637	0.0696	0.0981	0.0568	0.0585	0.0411	0.0528	0.1025	0.3256	0.1097	0.0698	0.0986	0.1232	0.1299	0.0744	0.08
cg14521552	0.848	0.7509	0.7937	0.6067	0.5876	0.5047	0.6436	0.5809	0.939	0.7167	0.5455	0.7177	0.5278	0.534	0.4756	0.6521	0.9284	0.5732	0.5867	0.4818	0.9412	0.5554	0.6593	0.6202	0.5603	0.5693	0.8966	0.7563	0.8468	0.8027	0.7026	0.8922	0.6009	0.4835	0.6526	0.8366	0.8841	0.7145	0.8187	0.5429	0.587	0.6437	0.856	0.7066	0.8095	0.6439	0.8677	0.8614	0.6757
cg11869184	0.8949	0.8519	0.8089	0.803	0.8502	0.8223	0.8459	0.8707	0.8532	0.8514	0.8571	0.8032	0.8769	0.8854	0.8317	0.8142	0.8659	0.8735	0.7454	0.8857	0.862	0.771	0.8877	0.8737	0.776	0.8466	0.8171	0.8645	0.8485	0.8893	0.8603	0.8628	0.8555	0.8721	0.8275	0.8935	0.8869	0.8797	0.8132	0.874	0.8977	0.8923	0.8816	0.8093	0.7801	0.8631	0.8429	0.8838	0.8692
cg00081574	0.0295	0.0281	0.0384	0.0377	0.0381	0.0338	0.0489	0.0333	0.0563	0.0365	0.0279	0.0359	0.0601	0.0505	0.0411	0.0927	0.0284	0.0316	0.0486	0.0425	0.0365	0.0468	0.0344	0.0485	0.0253	0.0366	0.045	0.0336	0.0324	0.056	0.0579	0.0378	0.0449	0.0424	0.041	0.039	0.0397	0.0569	0.0333	0.0473	0.039	0.0389	0.0441	0.0242	0.0369	0.0568	0.0453	0.0449	0.0506
cg14945774	0.7306	0.8734	0.856	0.5975	0.661	0.5742	0.283	0.2849	0.8489	0.5592	0.8408	0.7571	0.3645	0.7355	0.1808	0.7282	0.2045	0.8482	0.8953	0.2521	0.5946	0.6076	0.7756	0.8987	0.5023	0.7824	0.5617	0.4905	0.8228	0.8446	0.9296	0.8386	0.5961	0.5156	0.5773	0.5689	0.8505	0.8711	0.6622	0.2533	0.5743	0.7594	0.9037	0.4558	0.6233	0.8636	0.7513	0.5243	0.381
cg26651830	0.0452	0.0593	0.0493	0.0308	0.0383	0.0361	0.0381	0.0572	0.0377	0.0448	0.0388	0.0298	0.0705	0.0625	0.0454	0.0493	0.0369	0.0469	0.0307	0.0575	0.0414	0.0448	0.0431	0.0639	0.016	0.0266	0.0299	0.0448	0.0294	0.0358	0.0385	0.0417	0.0487	0.0521	0.0321	0.0387	0.0632	0.0534	0.0511	0.0521	0.1492	0.0385	0.0493	0.0419	0.0403	0.0433	0.039	0.0652	0.0513
cg05004337	0.0391	0.0639	0.0491	0.0632	0.0509	0.0403	0.0423	0.0761	0.0811	0.0553	0.06	0.0479	0.0662	0.077	0.0828	0.0873	0.0438	0.0384	0.0516	0.045	0.071	0.0581	0.0612	0.0554	0.0292	0.0358	0.0387	0.057	0.058	0.0305	0.0581	0.0407	0.0592	0.0581	0.0342	0.0541	0.0512	0.0468	0.0559	0.0464	0.0457	0.0494	0.0456	0.0595	0.0501	0.047	0.0379	0.091	0.0862
cg17123029	0.1148	0.0693	0.2106	0.0422	0.4117	0.13	0.1296	0.2089	0.1277	0.192	0.3642	0.0598	0.0902	0.5774	0.1219	0.0689	0.1905	0.0808	0.0576	0.047	0.0662	0.0785	0.0744	0.2155	0.074	0.1103	0.1517	0.1225	0.0675	0.1199	0.172	0.0929	0.1016	0.0636	0.0954	0.0651	0.0742	0.4819	0.1486	0.1104	0.8153	0.3189	0.3751	0.1304	0.0872	0.2004	0.11	0.2109	0.0566
cg08332658	0.3746	0.5777	0.359	0.41	0.0195	0.3368	0.0415	0.0885	0.0242	0.2862	0.0616	0.4296	0.0434	0.0442	0.0535	0.0296	0.0464	0.0282	0.0376	0.0375	0.4788	0.0444	0.2412	0.0753	0.3801	0.0515	0.4001	0.0355	0.1508	0.0258	0.561	0.0393	0.3304	0.1847	0.1748	0.0291	0.0269	0.0478	0.4522	0.0387	0.054	0.0317	0.071	0.0609	0.5402	0.3157	0.0306	0.0536	0.7613
cg23936463	0.1058	0.1165	0.101	0.0429	0.0806	0.0935	0.2799	0.1052	0.08	0.0997	0.2602	0.0551	0.1094	0.0671	0.0981	0.1229	0.1569	0.0801	0.1173	0.0584	0.0652	0.0905	0.1595	0.0711	0.0387	0.0654	0.0702	0.107	0.0723	0.0884	0.0947	0.0784	0.0944	0.0646	0.0704	0.0826	0.0786	0.1286	0.1082	0.1008	0.3564	0.1784	0.1144	0.039	0.0817	0.106	0.0969	0.1178	0.0851
cg15153228	0.9184	0.8397	0.8614	0.8466	0.8671	0.8817	0.8731	0.7964	0.8834	0.692	0.8488	0.8653	0.8565	0.7396	0.8421	0.6806	0.8939	0.8846	0.8865	0.8808	0.9051	0.8892	0.8623	0.8513	0.9386	0.805	0.8315	0.8821	0.8458	0.9071	0.8954	0.9093	0.8925	0.9009	0.8713	0.874	0.8846	0.8857	0.8027	0.9023	0.8627	0.854	0.8578	0.8493	0.7221	0.8921	0.9065	0.8058	0.9197
cg20239949	0.0251	0.0375	0.0405	0.025	0.0319	0.0454	0.0412	0.0349	0.0408	0.0387	0.0341	0.0252	0.032	0.03	0.0327	0.0336	0.0436	0.0336	0.0437	0.0345	0.0356	0.0426	0.0564	0.0305	0.0277	0.0463	0.0361	0.0402	0.0444	0.0375	0.0336	0.0383	0.0428	0.0397	0.0322	0.045	0.0251	0.0292	0.0257	0.0281	0.0362	0.0336	0.0377	0.0258	0.0375	0.0389	0.0315	0.0781	0.0407
cg13775316	0.0538	0.0182	0.0177	0.0141	0.0142	0.0144	0.0191	0.0229	0.0193	0.0259	0.1427	0.0191	0.0208	0.1357	0.0169	0.0164	0.0162	0.0139	0.0154	0.0188	0.0176	0.0229	0.0178	0.0206	0.0763	0.018	0.0195	0.014	0.0415	0.019	0.0177	0.0159	0.063	0.0218	0.0175	0.0205	0.0203	0.0153	0.0134	0.173	0.0171	0.2747	0.0194	0.0191	0.0143	0.0186	0.0156	0.0233	0.0176
cg08383338	0.0183	0.0259	0.0208	0.02	0.0195	0.0164	0.0221	0.3406	0.0179	0.0253	0.0164	0.0202	0.0164	0.0171	0.0183	0.0204	0.0187	0.0171	0.0268	0.0202	0.0236	0.0162	0.0246	0.0329	0.0169	0.017	0.021	0.0175	0.0175	0.0159	0.022	0.0255	0.0271	0.0164	0.0149	0.0294	0.0172	0.0179	0.0169	0.0157	0.018	0.0181	0.0181	0.019	0.0246	0.0256	0.0267	0.0242	0.0181
cg05291178	0.9421	0.9437	0.9554	0.9258	0.9384	0.9295	0.9501	0.933	0.9385	0.9664	0.9547	0.933	0.9452	0.9433	0.9288	0.9367	0.9567	0.9475	0.9297	0.9452	0.9594	0.9508	0.9657	0.9417	0.9383	0.9165	0.9186	0.9207	0.9579	0.9302	0.9504	0.9478	0.9592	0.945	0.9572	0.9537	0.9448	0.9464	0.935	0.9348	0.9634	0.9578	0.9337	0.9075	0.9458	0.951	0.9691	0.935	0.9497
cg21276379	0.341	0.2328	0.1373	0.0855	0.2821	0.246	0.4759	0.0875	0.2488	0.1764	0.4227	0.1782	0.2547	0.7952	0.2605	0.1228	0.5312	0.247	0.079	0.1674	0.1497	0.3093	0.245	0.3672	0.2614	0.195	0.1416	0.1747	0.1458	0.3889	0.398	0.214	0.2584	0.1147	0.3253	0.1451	0.1385	0.5979	0.1659	0.2994	0.6822	0.6577	0.3969	0.096	0.1176	0.3456	0.3863	0.2718	0.2136
cg09656389	0.1103	0.4565	0.0548	0.0529	0.7385	0.0746	0.1129	0.3965	0.0452	0.0725	0.7155	0.0389	0.5911	0.964	0.1182	0.193	0.7713	0.9576	0.2137	0.8589	0.4991	0.7683	0.4225	0.1441	0.845	0.3191	0.0982	0.1698	0.4923	0.3275	0.2404	0.1885	0.3374	0.06	0.4463	0.0799	0.1711	0.2894	0.1644	0.2725	0.7794	0.8305	0.5819	0.0415	0.2513	0.54	0.3362	0.4681	0.8375
cg01048751	0.2427	0.2283	0.2535	0.1913	0.2145	0.486	0.2169	0.2984	0.1557	0.5524	0.2033	0.1967	0.2149	0.7331	0.1448	0.1944	0.5094	0.3909	0.1931	0.1213	0.1729	0.3547	0.3085	0.2071	0.4105	0.3387	0.2562	0.2384	0.3106	0.5904	0.3838	0.3585	0.2346	0.1662	0.3149	0.2885	0.2412	0.4176	0.1811	0.1367	0.4192	0.6596	0.2479	0.1629	0.2069	0.2088	0.2499	0.3029	0.1562
cg24247673	0.73	0.7788	0.7871	0.7879	0.6846	0.7952	0.6795	0.6552	0.9038	0.7465	0.7411	0.8456	0.6599	0.6879	0.6409	0.8108	0.7836	0.6896	0.7304	0.5538	0.7505	0.8717	0.7067	0.8552	0.6836	0.6808	0.7749	0.7373	0.8367	0.7322	0.7469	0.6995	0.6155	0.7575	0.7379	0.7131	0.8603	0.8761	0.7814	0.6397	0.6432	0.7182	0.8174	0.7137	0.6745	0.6771	0.7359	0.6709	0.6837
cg19009280	0.0793	0.1244	0.0947	0.3072	0.0972	0.3272	0.113	0.7025	0.0735	0.114	0.1923	0.179	0.2859	0.8895	0.186	0.0589	0.6993	0.379	0.3859	0.1734	0.0717	0.3292	0.1042	0.1208	0.4657	0.281	0.0756	0.1651	0.0427	0.5726	0.2483	0.3708	0.1114	0.4704	0.1494	0.0369	0.0546	0.2002	0.0399	0.1823	0.5629	0.5075	0.0759	0.0858	0.1904	0.5303	0.2379	0.5174	0.0956
cg13107760	0.0632	0.0565	0.0775	0.0317	0.045	0.0415	0.0456	0.3142	0.0383	0.0776	0.0471	0.0465	0.0567	0.0467	0.045	0.0406	0.0551	0.0454	0.0574	0.0734	0.0699	0.0635	0.0668	0.0455	0.0416	0.0482	0.066	0.0378	0.0341	0.046	0.0516	0.0694	0.0721	0.0495	0.0333	0.0844	0.0413	0.0631	0.0479	0.0457	0.0528	0.0339	0.0525	0.0431	0.0606	0.0724	0.0665	0.0437	0.0615
cg02529627	0.0428	0.0711	0.0438	0.0307	0.0434	0.0322	0.0388	0.1124	0.0653	0.0406	0.0426	0.03	0.0446	0.0469	0.0787	0.05	0.04	0.0327	0.0652	0.0419	0.037	0.053	0.0489	0.0516	0.0381	0.0592	0.0406	0.0496	0.0547	0.0381	0.0468	0.0503	0.0547	0.0482	0.0341	0.0322	0.042	0.0511	0.0286	0.0386	0.0498	0.07	0.0577	0.0244	0.0392	0.0503	0.0449	0.0687	0.0499
cg06244512	0.0342	0.0193	0.0183	0.0104	0.0188	0.0128	0.0151	0.0184	0.0121	0.0155	0.0109	0.016	0.0163	0.019	0.0179	0.0167	0.0144	0.0161	0.0127	0.0177	0.0136	0.0126	0.0156	0.0159	0.01527	0.0183	0.0158	0.0095	0.0167	0.0143	0.0129	0.0136	0.0204	0.0175	0.0119	0.0198	0.0198	0.0101	0.0135	0.0194	0.0219	0.012	0.0155	0.0131	0.0125	0.0173	0.0161	0.0194	0.0169
cg01936347	0.8056	0.7733	0.8379	0.7177	0.7899	0.8103	0.7526	0.76	0.7925	0.8372	0.8298	0.7811	0.7056	0.8466	0.7339	0.7126	0.7394	0.5961	0.8248	0.5591	0.8345	0.8284	0.7801	0.8228	0.7848	0.8072	0.7667	0.7344	0.8417	0.5931	0.8647	0.8037	0.7312	0.7822	0.7076	0.8382	0.831	0.8738	0.8071	0.8117	0.6899	0.8448	0.8009	0.5817	0.7919	0.8255	0.8216	0.6136	0.6368
cg23699274	0.0707	0.0317	0.0456	0.0388	0.0379	0.03	0.035	0.0418	0.0411	0.0459	0.0411	0.0265	0.0374	0.0396	0.0275	0.0414	0.0673	0.0432	0.0337	0.036	0.036	0.0779	0.0503	0.0572	0.0268	0.0243	0.0344	0.0601	0.0339	0.0312	0.0317	0.0419	0.0325	0.0421	0.0344	0.044	0.0414	0.0416	0.0495	0.0421	0.065	0.0519	0.0313	0.0316	0.0449	0.0354	0.034	0.05	0.0459
cg25940946	0.0098	0.0204	0.0149	0.0171	0.5082	0.0659	0.0155	0.022	0.0103	0.0273	0.0079	0.0131	0.0117	0.8384	0.0161	0.0118	0.0118	0.0101	0.0131	0.0246	0.0137	0.0117	0.0141	0.0357	0.0282	0.0143	0.0141	0.0478	0.0097	0.012	0.0122	0.0216	0.0305	0.0109	0.0886	0.058	0.0094	0.0114	0.012	0.0117	0.671	0.1131	0.3033	0.0086	0.0252	0.0229	0.1086	0.216	0.0135
cg09994773	0.5918	0.7345	0.4417	0.5757	0.718	0.7215	0.5696	0.6761	0.8642	0.6794	0.7147	0.4495	0.8135	0.7935	0.5454	0.5458	0.8967	0.7714	0.4537	0.5414	0.7761	0.4452	0.504	0.8196	0.6631	0.6097	0.6762	0.8104	0.7785	0.6371	0.8656	0.5932	0.7534	0.4774	0.7871	0.6387	0.8409	0.7375	0.7741	0.6009	0.8441	0.8805	0.6243	0.6821	0.6145	0.53	0.6406	0.8435	0.8284
cg11965370	0.0486	0.057	0.0609	0.0283	0.0857	0.0478	0.0471	0.0578	0.1134	0.0595	0.0633	0.056	0.0443	0.0467	0.0412	0.0657	0.0408	0.0425	0.0525	0.0412	0.043	0.0752	0.0436	0.1249	0.05	0.037	0.0466	0.0507	0.0431	0.0277	0.0345	0.0487	0.0551	0.0392	0.0392	0.055	0.0322	0.0318	0.0488	0.0301	0.5305	0.0304	0.0427	0.0404	0.0528	0.0499	0.0419	0.0453	0.036
cg06697339	0.022	0.0418	0.0215	0.0216	0.0185	0.0142	0.0167	0.0345	0.0136	0.1044	0.015	0.0154	0.0179	0.0125	0.0189	0.0137	0.1545	0.0129	0.018	0.013	0.0201	0.016	0.031	0.0145	0.0284	0.0187	0.0199	0.0144	0.0243	0.0206	0.0143	0.0648	0.1064	0.0144	0.0796	0.0186	0.0141	0.0126	0.0223	0.0155	0.026	0.0155	0.0239	0.0134	0.0361	0.0191	0.0193	0.0217	0.0175
cg11725689	0.0506	0.0544	0.0565	0.0536	0.0539	0.0407	0.0633	0.053	0.0744	0.0629	0.0559	0.0547	0.0659	0.0743	0.053	0.0754	0.0576	0.0389	0.0486	0.0828	0.0635	0.077	0.0618	0.06	0.0444	0.0593	0.0473	0.0438	0.0386	0.0724	0.0632	0.0624	0.0576	0.0805	0.0558	0.0829	0.0708	0.0548	0.0445	0.0924	0.0705	0.0765	0.0655	0.0529	0.0487	0.0643	0.0696	0.0636	0.0609
cg24121098	0.0097	0.0141	0.0156	0.0104	0.0126	0.0115	0.0148	0.0144	0.0129	0.0149	0.0129	0.0138	0.0117	0.0189	0.0139	0.0177	0.0114	0.0126	0.012	0.0117	0.0119	0.0141	0.0145	0.0142	0.0102	0.0133	0.0132	0.0118	0.0099	0.0163	0.0186	0.0149	0.0166	0.0146	0.0112	0.016	0.0127	0.0124	0.011	0.0146	0.0163	0.0136	0.0134	0.0117	0.0134	0.0144	0.0138	0.0161	0.0167
cg04830857	0.8568	0.6065	0.433	0.254	0.889	0.6916	0.8403	0.818	0.9084	0.5691	0.7675	0.5787	0.5785	0.8888	0.361	0.6049	0.9203	0.8391	0.595	0.4981	0.4229	0.8736	0.5982	0.8279	0.6267	0.6636	0.5305	0.4831	0.8428	0.5431	0.8735	0.6534	0.7434	0.5968	0.7908	0.4883	0.6925	0.8908	0.7425	0.7007	0.9111	0.8788	0.855	0.4518	0.3957	0.6263	0.6601	0.8435	0.587
cg18095109	0.1268	0.4224	0.1394	0.1021	0.0936	0.1346	0.1472	0.5213	0.1512	0.136	0.1431	0.1221	0.1487	0.4997	0.1238	0.1348	0.2139	0.0995	0.1246	0.1637	0.1348	0.1493	0.1396	0.1456	0.1332	0.1237	0.1204	0.0927	0.1118	0.1453	0.1546	0.1202	0.1352	0.1484	0.1144	0.1059	0.1544	0.1395	0.1297	0.1382	0.2385	0.6861	0.2658	0.1015	0.101	0.141	0.1347	0.1076	0.1647
cg24685998	0.0466	0.0802	0.0485	0.0362	0.0432	0.0376	0.1102	0.0338	0.0403	0.1432	0.032	0.0511	0.0564	0.2965	0.032	0.0478	0.0662	0.0502	0.0348	0.0418	0.0366	0.0333	0.0463	0.0466	0.0274	0.0436	0.0331	0.0487	0.0541	0.0723	0.0354	0.0596	0.0903	0.062	0.383	0.046	0.043	0.0699	0.0431	0.0705	0.7881	0.5852	0.3036	0.0336	0.054	0.0499	0.0698	0.1009	0.0598
cg21931717	0.0247	0.0201	0.0246	0.017	0.0252	0.0171	0.0237	0.2091	0.0166	0.023	0.1478	0.0286	0.0169	0.4689	0.0191	0.0444	0.4005	0.017	0.1101	0.0189	0.1313	0.0217	0.0235	0.436	0.0167	0.0207	0.0189	0.0174	0.0171	0.0206	0.0226	0.0433	0.0242	0.4419	0.0236	0.0255	0.1756	0.4292	0.0222	0.0185	0.4372	0.3495	0.0175	0.0173	0.0245	0.4128	0.087	0.1395	0.0223
cg22826226	0.7544	0.7427	0.8564	0.7313	0.7695	0.8127	0.8727	0.675	0.8117	0.889	0.8513	0.8749	0.7825	0.8083	0.7854	0.7523	0.7671	0.7007	0.8032	0.8513	0.8542	0.8386	0.9164	0.7411	0.6074	0.7278	0.8768	0.8205	0.7536	0.8716	0.8441	0.8958	0.8723	0.8402	0.8153	0.8861	0.7952	0.8272	0.7398	0.863	0.8796	0.6336	0.8084	0.82	0.8321	0.8738	0.8927	0.7334	0.8105
cg07559653	0.21361	0.2319	0.2037	0.2909	0.1791	0.194	0.2069	0.3104	0.24396	0.238	0.4619	0.1956	0.2658	0.3209	0.2782	0.3256	0.6601	0.2027	0.2831	0.1785	0.1609	0.3823	0.24496	0.4797	0.217356	0.2499	0.1884	0.2172	0.2878	0.3627	0.194	0.1589	0.1476	0.3448	0.2381	0.2297	0.2554	0.4315	0.2649	0.3392	0.3775	0.3128	0.3049	0.1561	0.1931	0.2139	0.1396	0.2852	0.3122
cg01003595	0.18234	0.2151	0.1408	0.1791	0.1958	0.1183	0.1213	0.274	0.2371	0.1004	0.1823	0.0871	0.3126	0.2765	0.138	0.2976	0.2986	0.1828	0.0899	0.2662	0.1125	0.2501	0.1273	0.2722	0.11825	0.0916	0.1286	0.2109	0.2709	0.2172	0.1677	0.1059	0.1184	0.3996	0.1398	0.1202	0.308	0.2822	0.2264	0.2152	0.6817	0.2268	0.3024	0.1625	0.1814	0.1044	0.1165	0.2758	0.2759
cg01025836	0.2634	0.3214	0.0467	0.054	0.0367	0.5502	0.3686	0.5519	0.0446	0.1036	0.3794	0.0613	0.3096	0.3301	0.0233	0.1341	0.1585	0.5263	0.1058	0.0967	0.1107	0.0817	0.5234	0.3173	0.0193	0.3785	0.0415	0.0841	0.0789	0.4564	0.0311	0.0909	0.4199	0.066	0.1389	0.0627	0.0556	0.0856	0.1136	0.0504	0.8238	0.4216	0.6708	0.1277	0.058	0.4126	0.0681	0.0895	0.0525
cg19046826	0.0129	0.2141	0.0897	0.0182	0.0141	0.013	0.0685	0.0433	0.0098	0.066	0.0544	0.0187	0.0548	0.8542	0.0521	0.0401	0.0112	0.0106	0.0437	0.013	0.0837	0.0203	0.0455	0.0407	0.0416	0.0182	0.0223	0.0106	0.1234	0.0254	0.0141	0.0405	0.056	0.0154	0.1274	0.0342	0.0103	0.0228	0.0109	0.0098	0.3988	0.5657	0.0192	0.0097	0.0982	0.0594	0.0465	0.0802	0.0146
cg24995347	0.8217	0.7321	0.8229	0.6391	0.3061	0.6144	0.7398	0.2303	0.8189	0.8511	0.3141	0.839	0.4165	0.1491	0.1039	0.576	0.8913	0.7207	0.6287	0.6001	0.7183	0.7529	0.6423	0.7066	0.7534	0.7408	0.5477	0.542	0.7859	0.8766	0.5624	0.846	0.5378	0.6747	0.7492	0.6464	0.8366	0.8635	0.5887	0.5533	0.5944	0.7101	0.8839	0.3504	0.7331	0.792	0.8223	0.4297	0.4635
cg06835628	0.0455	0.0289	0.0211	0.0229	0.0222	0.3258	0.0223	0.2851	0.029	0.0178	0.3536	0.0216	0.062	0.0392	0.0265	0.0273	0.0448	0.6688	0.0234	0.224	0.0201	0.0212	0.0241	0.0393	0.086	0.0215	0.0247	0.1909	0.0258	0.0976	0.027	0.0253	0.0278	0.0335	0.2391	0.0195	0.0346	0.0249	0.0208	0.028	0.021	0.4616	0.0275	0.0167	0.0209	0.0228	0.0282	0.046	0.0268
cg12426344	0.921	0.3315	0.2465	0.1569	0.0942	0.3868	0.2611	0.0862	0.2376	0.4304	0.1368	0.116	0.0811	0.6798	0.1095	0.3072	0.6772	0.1147	0.2359	0.1281	0.1119	0.4143	0.2283	0.1133	0.1469	0.145	0.2016	0.2798	0.2431	0.2286	0.8001	0.2583	0.3395	0.1218	0.1003	0.2171	0.2957	0.257	0.2785	0.0881	0.8505	0.6333	0.3504	0.1081	0.3704	0.4479	0.2033	0.175	0.1065
cg21855286	0.8616	0.8396	0.9065	0.8874	0.886	0.9031	0.9119	0.834	0.8628	0.8956	0.8706	0.8817	0.8843	0.8555	0.845	0.8568	0.871	0.8488	0.8697	0.8453	0.9085	0.8532	0.8865	0.859	0.8462	0.8689	0.8848	0.8855	0.905	0.8876	0.8871	0.8935	0.8946	0.8807	0.897	0.891	0.862	0.8915	0.8863	0.8767	0.8927	0.9006	0.8601	0.8761	0.8758	0.9144	0.9157	0.8211	0.8614
cg13278100	0.1002	0.0443	0.0404	0.0359	0.0538	0.0529	0.0891	0.0565	0.0433	0.0682	0.0366	0.048	0.0916	0.3116	0.0867	0.059	0.1408	0.2717	0.0366	0.0591	0.0448	0.0462	0.0718	0.1121	0.0718	0.0459	0.0683	0.0803	0.0508	0.1135	0.0798	0.0936	0.1422	0.0487	0.1157	0.0513	0.0555	0.0429	0.0531	0.0694	0.5492	0.199	0.0819	0.0331	0.0828	0.0825	0.0964	0.1265	0.0536
cg25198830	0.8934	0.848	0.8879	0.9247	0.9008	0.9118	0.915	0.9124	0.8976	0.7965	0.9055	0.8923	0.6964	0.7004	0.9475	0.8746	0.9219	0.758	0.866	0.3475	0.9316	0.9214	0.8278	0.9213	0.8857	0.5862	0.8834	0.9159	0.7681	0.8745	0.9292	0.838	0.6934	0.5344	0.728	0.9063	0.8812	0.9243	0.8573	0.9075	0.9278	0.7214	0.9202	0.8085	0.8524	0.9203	0.9278	0.8976	0.6185
cg26325286	0.2938	0.4746	0.787	0.4702	0.3865	0.5042	0.4648	0.1544	0.22	0.6544	0.4207	0.4604	0.2143	0.1344	0.1932	0.384	0.6564	0.1234	0.3977	0.1616	0.8301	0.7407	0.2663	0.5682	0.4081	0.3757	0.5404	0.3236	0.4478	0.3851	0.5708	0.3793	0.3441	0.3118	0.4663	0.802	0.7436	0.2684	0.3799	0.1739	0.345	0.1335	0.5346	0.2183	0.4504	0.3534	0.6723	0.2345	0.3469
cg16992713	0.0408	0.0493	0.0648	0.034	0.0234	0.0266	0.043	0.0692	0.058	0.0788	0.0536	0.0411	0.0439	0.6883	0.0639	0.0544	0.0447	0.0183	0.0513	0.043	0.0457	0.0258	0.0444	0.0431	0.0264	0.043	0.0521	0.034	0.0362	0.034	0.0399	0.0666	0.0899	0.0552	0.0239	0.0759	0.0278	0.0427	0.0482	0.0464	0.76	0.0881	0.0518	0.0325	0.0676	0.0374	0.0516	0.079	0.0369
cg08859411	0.8556	0.5782	0.9229	0.8894	0.8986	0.7633	0.7052	0.6701	0.8471	0.9281	0.2535	0.5425	0.1277	0.1062	0.0841	0.8218	0.8325	0.2628	0.8857	0.1723	0.9522	0.6019	0.8279	0.6947	0.6368	0.6006	0.931	0.6408	0.8346	0.6555	0.5842	0.8748	0.6807	0.9011	0.7341	0.8003	0.8938	0.8915	0.6538	0.1529	0.7806	0.6167	0.9061	0.4157	0.7698	0.581	0.8406	0.7364	0.5261
cg19355182	0.0283	0.0361	0.0243	0.0184	0.0116	0.0132	0.0255	0.0264	0.0129	0.0402	0.0099	0.0177	0.0129	0.1204	0.0243	0.0118	0.0224	0.0137	0.0195	0.0139	0.0223	0.0106	0.0317	0.013	0.03078	0.0219	0.0272	0.0111	0.026	0.0157	0.0225	0.0672	0.0919	0.0123	0.0113	0.0176	0.013	0.0111	0.0129	0.0143	0.7603	0.4437	0.0267	0.0088	0.0371	0.0307	0.0195	0.0257	0.0156
cg27298243	0.0282	0.0407	0.0427	0.0231	0.0312	0.0262	0.0624	0.0446	0.03	0.0472	0.0323	0.0486	0.0696	0.0336	0.0363	0.0387	0.0229	0.0272	0.0439	0.0331	0.0469	0.0293	0.0503	0.0417	0.0264	0.0355	0.0462	0.0518	0.0663	0.0452	0.0385	0.0647	0.0552	0.0321	0.0217	0.0551	0.0293	0.0327	0.0338	0.0358	0.0783	0.0239	0.0384	0.0311	0.0523	0.0508	0.0468	0.0329	0.0338
cg00106074	0.0165	0.0174	0.0166	0.0142	0.0172	0.0144	0.0181	0.0275	0.0226	0.0185	0.0183	0.0195	0.0198	0.0269	0.0181	0.0266	0.0186	0.016	0.0186	0.0226	0.0201	0.0236	0.0188	0.0232	0.0138	0.0164	0.0172	0.0173	0.015	0.0246	0.0207	0.0202	0.0194	0.0233	0.0145	0.021	0.0213	0.0215	0.0162	0.0219	0.0181	0.0183	0.0179	0.0154	0.0164	0.0195	0.0165	0.0241	0.0204
cg12396999	0.0233	0.0349	0.0361	0.0259	0.0368	0.033	0.0358	0.0285	0.0321	0.0411	0.048	0.0264	0.0318	0.036	0.0351	0.0327	0.0333	0.0312	0.0283	0.0318	0.0457	0.0467	0.0283	0.0341	0.0173	0.0235	0.0277	0.0259	0.0232	0.0382	0.0349	0.0325	0.0404	0.0348	0.0276	0.042	0.0267	0.0392	0.0344	0.0365	0.0337	0.0296	0.0306	0.0273	0.0373	0.0368	0.0402	0.0387	0.0367
cg10951630	0.0584	0.0341	0.0391	0.0243	0.0309	0.0269	0.0345	0.0451	0.0485	0.0314	0.0307	0.0308	0.0475	0.0458	0.0336	0.0461	0.0305	0.0303	0.0263	0.0365	0.0364	0.0326	0.0424	0.0379	0.0519	0.0279	0.0248	0.0243	0.0222	0.0388	0.0384	0.0313	0.0323	0.0503	0.0383	0.0414	0.03	0.0341	0.0293	0.0346	0.0285	0.0289	0.041	0.024	0.035	0.0404	0.0344	0.0374	0.0516
cg04917511	0.0222	0.0173	0.015	0.0144	0.0107	0.0126	0.0148	0.0204	0.0123	0.08	0.0132	0.0146	0.0123	0.9636	0.0152	0.0145	0.0893	0.0127	0.015	0.0114	0.0153	0.0132	0.0158	0.0124	0.0256	0.0157	0.0161	0.0125	0.1934	0.0139	0.0134	0.0147	0.0197	0.0132	0.0111	0.0139	0.013	0.0187	0.015	0.0122	0.5223	0.4483	0.0135	0.0115	0.0134	0.0155	0.0126	0.2269	0.0124
cg04863508	0.0646	0.0429	0.0447	0.0355	0.0439	0.0374	0.0545	0.0536	0.0558	0.0431	0.0452	0.0379	0.0522	0.0566	0.0491	0.0624	0.0471	0.036	0.0323	0.0702	0.0413	0.0558	0.0546	0.059	0.039	0.0381	0.0457	0.0398	0.0476	0.0457	0.1417	0.0494	0.0506	0.0635	0.0555	0.0471	0.0531	0.0581	0.0503	0.061	0.0487	0.0569	0.0655	0.0343	0.0569	0.0556	0.0553	0.0566	0.0613
cg14965353	0.0539	0.0515	0.0614	0.0222	0.0345	0.0416	0.0737	0.0651	0.0513	0.3056	0.4487	0.0303	0.0247	0.0525	0.0529	0.0729	0.0925	0.035	0.0815	0.0504	0.0735	0.033	0.086	0.0814	0.2979	0.0503	0.0451	0.0372	0.0634	0.0513	0.0647	0.0661	0.0561	0.0283	0.0262	0.043	0.0933	0.0741	0.0242	0.0504	0.3605	0.0525	0.0704	0.0246	0.042	0.0584	0.0439	0.0803	0.0515
cg03958863	0.9371	0.8986	0.9268	0.9335	0.9196	0.9155	0.8573	0.6671	0.9067	0.9367	0.7813	0.8875	0.8858	0.4984	0.8338	0.8765	0.7406	0.7954	0.8978	0.8752	0.9385	0.8444	0.8419	0.8999	0.9247	0.6593	0.8722	0.9153	0.894	0.9046	0.8954	0.9125	0.9332	0.9025	0.6797	0.9009	0.8738	0.9209	0.9195	0.8971	0.605	0.7746	0.9107	0.8643	0.9237	0.9357	0.9393	0.8969	0.7735
cg22849541	0.6107	0.6971	0.6024	0.5768	0.5463	0.3824	0.5139	0.1099	0.4278	0.5119	0.3113	0.5012	0.1501	0.2057	0.0678	0.5526	0.4142	0.1329	0.3859	0.1033	0.3355	0.6226	0.1963	0.3211	0.6304	0.3537	0.3561	0.3654	0.6003	0.3472	0.2762	0.5732	0.4869	0.351	0.2044	0.4143	0.5658	0.2345	0.4252	0.1896	0.2437	0.1843	0.2974	0.1826	0.3412	0.2334	0.3204	0.3048	0.4993
cg02721693	0.5357	0.6631	0.8581	0.747	0.3429	0.6626	0.5973	0.3616	0.7953	0.8305	0.7217	0.8555	0.7594	0.2538	0.3043	0.7274	0.9099	0.7533	0.8653	0.7074	0.8752	0.6675	0.7303	0.712	0.6643	0.6552	0.796	0.6382	0.6002	0.872	0.684	0.9208	0.7791	0.5959	0.8255	0.8037	0.6429	0.846	0.4512	0.6805	0.64	0.7345	0.7716	0.54	0.7229	0.795	0.8443	0.5601	0.461
cg25316853	0.0906	0.0847	0.0655	0.0635	0.0693	0.0695	0.0625	0.0884	0.0617	0.0671	0.0568	0.0474	0.0781	0.0736	0.0607	0.0779	0.0825	0.0693	0.0357	0.073	0.0536	0.0857	0.0479	0.0836	0.0749	0.0414	0.0322	0.0758	0.1037	0.0536	0.0745	0.0716	0.0519	0.1765	0.0541	0.0812	0.0577	0.0735	0.0935	0.0765	0.1076	0.0598	0.0795	0.0706	0.0559	0.0681	0.0535	0.0919	0.0718
cg19107595	0.6571	0.4286	0.3283	0.5253	0.3853	0.5986	0.5169	0.624	0.3916	0.3401	0.4071	0.432	0.2586	0.6693	0.1877	0.4891	0.7336	0.5091	0.2248	0.614	0.5589	0.3064	0.5811	0.6018	0.0458	0.5438	0.4289	0.387	0.362	0.5423	0.4073	0.4107	0.2781	0.5906	0.3326	0.414	0.4604	0.6331	0.3365	0.4034	0.4263	0.4019	0.5176	0.5936	0.3511	0.2624	0.5477	0.382	0.4124
cg15323252	0.0593	0.0201	0.0175	0.0128	0.0148	0.0653	0.0172	0.0208	0.0142	0.0262	0.1557	0.017	0.0148	0.6196	0.0212	0.0157	0.0192	0.0145	0.02	0.0148	0.0177	0.0148	0.0183	0.0354	0.0379	0.0189	0.0469	0.0123	0.0257	0.0535	0.0147	0.0155	0.0213	0.0241	0.0151	0.0172	0.0159	0.017	0.0132	0.0154	0.3867	0.4706	0.0166	0.0104	0.0143	0.0249	0.0175	0.0304	0.0146
cg09509622	0.016	0.0225	0.0217	0.0148	0.4061	0.0157	0.0541	0.0267	0.0145	0.0202	0.2378	0.016	0.235	0.8406	0.0185	0.0207	0.0193	0.0147	0.0157	0.3049	0.0208	0.017	0.3209	0.0305	0.0138	0.0201	0.0169	0.0212	0.0203	0.0158	0.371	0.018	0.0177	0.0207	0.0176	0.0169	0.0224	0.0173	0.0143	0.0164	0.4744	0.2871	0.0164	0.1657	0.0191	0.0215	0.0195	0.0484	0.0152
cg16181190	0.026	0.0266	0.0203	0.0205	0.0215	0.0176	0.0216	0.0284	0.0225	0.0241	0.0181	0.0198	0.026	0.0214	0.0249	0.0211	0.0241	0.019	0.0186	0.0249	0.0198	0.022	0.0204	0.0261	0.0186	0.0168	0.02	0.0185	0.0214	0.0176	0.0199	0.0191	0.0233	0.0344	0.0192	0.0283	0.0276	0.0235	0.0203	0.0225	0.0226	0.0212	0.0225	0.0198	0.0228	0.0221	0.0203	0.0279	0.0224
cg05737526	0.0729	0.055	0.0517	0.0552	0.0595	0.051	0.0355	0.0822	0.061	0.0884	0.0756	0.0359	0.0571	0.041	0.0461	0.069	0.0684	0.0397	0.029	0.0429	0.0393	0.0428	0.053	0.0418	0.0839	0.0419	0.0394	0.0898	0.0769	0.0485	0.0469	0.0671	0.1243	0.063	0.1049	0.0437	0.0464	0.0572	0.0518	0.0407	0.4994	0.261	0.0538	0.1055	0.0506	0.0457	0.0882	0.2482	0.0683
cg27522780	0.055	0.0585	0.0586	0.0471	0.039	0.0482	0.0717	0.0643	0.052	0.0549	0.0765	0.0452	0.0503	0.557	0.0493	0.0622	0.078	0.0429	0.0369	0.0504	0.0612	0.0417	0.0604	0.0559	0.072	0.0381	0.0481	0.0519	0.0351	0.0643	0.0518	0.0762	0.075	0.0674	0.0565	0.0585	0.0559	0.0739	0.0395	0.0571	0.769	0.3451	0.0629	0.0329	0.066	0.0733	0.0611	0.0692	0.0593
cg05785488	0.0186	0.0156	0.0193	0.0141	0.0194	0.0221	0.023	0.0188	0.0219	0.0307	0.0203	0.0175	0.012	0.0102	0.0122	0.0168	0.1839	0.0187	0.0146	0.0245	0.0178	0.0118	0.0191	0.0109	0.0114	0.0303	0.0168	0.0553	0.0134	0.0141	0.0252	0.033	0.0336	0.013	0.0124	0.0259	0.0138	0.0136	0.0124	0.0139	0.1224	0.0111	0.0167	0.0133	0.0222	0.0199	0.0235	0.2834	0.0134
cg08731623	0.0107	0.0171	0.0215	0.02	0.0166	0.0143	0.0239	0.023	0.0162	0.0294	0.0215	0.0311	0.0266	0.0255	0.02	0.0574	0.0165	0.016	0.0283	0.0335	0.0284	0.0208	0.0266	0.0183	0.0246	0.0197	0.0251	0.0138	0.0126	0.0269	0.0212	0.0263	0.0217	0.0225	0.0144	0.0258	0.0162	0.0196	0.0166	0.0213	0.0288	0.1045	0.0194	0.0163	0.0192	0.0358	0.0243	0.018	0.0172
cg11586658	0.0197	0.023	0.0217	0.0183	0.0181	0.0152	0.0176	0.0304	0.0238	0.0222	0.0171	0.023	0.0307	0.1585	0.0192	0.0234	0.0187	0.0174	0.0229	0.0254	0.0209	0.0318	0.0199	0.0226	0.0221	0.0225	0.0275	0.018	0.0369	0.0261	0.0209	0.0216	0.0155	0.0242	0.0173	0.0274	0.0264	0.025	0.0177	0.0248	0.022	0.0269	0.0245	0.0144	0.0188	0.024	0.0237	0.0265	0.0294
cg02367708	0.2338	0.4864	0.1479	0.0937	0.1848	0.3318	0.5198	0.2759	0.1447	0.2842	0.0981	0.5325	0.4503	0.5689	0.3595	0.1598	0.4589	0.8109	0.1318	0.6959	0.1254	0.1403	0.1596	0.489	0.4725	0.1283	0.2024	0.4519	0.1215	0.4546	0.1298	0.319	0.3856	0.2577	0.5145	0.1805	0.0985	0.2197	0.1491	0.4785	0.1175	0.5532	0.6257	0.1183	0.2825	0.6965	0.5518	0.362	0.3412
cg25240445	0.0264	0.0272	0.0177	0.0125	0.0147	0.0157	0.0187	0.0352	0.0211	0.0191	0.015	0.0208	0.0209	0.0177	0.0226	0.0194	0.0145	0.0141	0.0188	0.0194	0.0164	0.02	0.0138	0.0234	0.044	0.0175	0.0184	0.0162	0.0252	0.0183	0.0194	0.0212	0.0182	0.0225	0.0145	0.0215	0.0224	0.0184	0.019	0.0179	0.012	0.0141	0.0199	0.0186	0.0166	0.0177	0.0184	0.0282	0.0183
cg07902473	0.0584	0.0677	0.0656	0.0398	0.0671	0.0394	0.0517	0.0495	0.1022	0.072	0.0623	0.0758	0.073	0.8685	0.0704	0.0737	0.0667	0.0387	0.0383	0.0441	0.0498	0.0722	0.0469	0.1967	0.0511	0.0372	0.0502	0.0525	0.0714	0.0659	0.0704	0.0598	0.081	0.0818	0.0654	0.1906	0.1322	0.0645	0.0533	0.1198	0.7929	0.7672	0.2297	0.0587	0.0546	0.0509	0.0478	0.0946	0.0506
cg05455370	0.0483	0.0415	0.0623	0.042	0.044	0.0387	0.0493	0.0314	0.053	0.0561	0.0367	0.042	0.0404	0.0323	0.0443	0.0371	0.0427	0.0252	0.067	0.0427	0.0563	0.0277	0.0654	0.0326	0.0826	0.0502	0.0546	0.0351	0.0484	0.049	0.0367	0.0721	0.0671	0.0304	0.0328	0.0595	0.0238	0.0546	0.0379	0.031	0.0434	0.0436	0.0329	0.0347	0.0537	0.0598	0.0751	0.0397	0.0478
cg26117023	0.032	0.0169	0.0244	0.0203	0.0431	0.0273	0.0206	0.0229	0.0151	0.0229	0.0173	0.0211	0.0218	0.8947	0.0218	0.022	0.026	0.0404	0.0218	0.0162	0.0292	0.0159	0.021	0.0165	0.0935	0.0266	0.0192	0.019	0.0142	0.0165	0.2239	0.0232	0.0286	0.0137	0.1387	0.0242	0.0132	0.0165	0.0145	0.0161	0.7255	0.6382	0.0206	0.0158	0.0302	0.0716	0.0199	0.2628	0.0967
cg04408595	0.0258	0.4728	0.0743	0.094	0.4752	0.5931	0.1164	0.7619	0.0399	0.086	0.6483	0.2006	0.0209	0.9227	0.2457	0.15	0.4466	0.0208	0.0825	0.0197	0.5252	0.0182	0.3671	0.3284	0.311	0.0281	0.2675	0.3672	0.0871	0.0244	0.8438	0.4799	0.031	0.0226	0.0142	0.5425	0.0677	0.3521	0.3761	0.0203	0.5291	0.4884	0.3613	0.067	0.3995	0.458	0.0426	0.3614	0.0189
cg11322464	0.0954	0.0293	0.029	0.0256	0.0213	0.0202	0.1995	0.0318	0.0203	0.1125	0.1835	0.0236	0.0147	0.9686	0.0261	0.0174	0.8431	0.0165	0.0209	0.0162	0.1082	0.1017	0.0387	0.1595	0.0895	0.0275	0.0233	0.0179	0.0358	0.0197	0.044	0.0276	0.0322	0.0163	0.0293	0.0382	0.3269	0.0382	0.0299	0.0155	0.6765	0.5761	0.2857	0.0219	0.0262	0.0397	0.0321	0.0969	0.0334
cg09945801	0.1478	0.3249	0.2844	0.0905	0.1651	0.0979	0.2067	0.0604	0.0851	0.1625	0.1849	0.1065	0.095	0.0619	0.0928	0.2902	0.0878	0.0568	0.223	0.0827	0.2225	0.3842	0.1266	0.1575	0.1146	0.2173	0.2147	0.2031	0.3638	0.1901	0.3815	0.1713	0.1576	0.1206	0.0928	0.2184	0.1537	0.3175	0.2987	0.11	0.1484	0.0814	0.1427	0.1031	0.1093	0.1401	0.2383	0.0827	0.1247
cg24041078	0.084	0.087	0.4113	0.3767	0.0953	0.4713	0.1113	0.0512	0.0432	0.405	0.0486	0.1686	0.0692	0.0367	0.0419	0.0412	0.0977	0.0457	0.0294	0.0397	0.0624	0.0532	0.11	0.1488	0.1169	0.0484	0.1469	0.0707	0.1696	0.0536	0.4539	0.1174	0.0456	0.4891	0.0468	0.0453	0.2865	0.2142	0.0388	0.0687	0.0395	0.0349	0.1763	0.4566	0.0403	0.2657	0.2043	0.1023	0.2459
cg00508534	0.961	0.8098	0.9371	0.8829	0.8471	0.9203	0.9409	0.8328	0.8841	0.9287	0.8972	0.9416	0.8944	0.896	0.9185	0.9023	0.9062	0.8064	0.9095	0.907	0.9422	0.8618	0.9242	0.8489	0.93406	0.9393	0.9406	0.9008	0.8621	0.9258	0.8833	0.9448	0.9471	0.8958	0.8804	0.9432	0.9152	0.8891	0.8722	0.9088	0.9402	0.8971	0.8812	0.9159	0.9335	0.9234	0.9371	0.8166	0.9066
cg11240212	0.0346	0.0326	0.043	0.0256	0.0252	0.029	0.037	0.0262	0.0464	0.0351	0.0272	0.0303	0.031	0.0325	0.0278	0.029	0.0388	0.0329	0.0378	0.0273	0.0445	0.0287	0.0439	0.0349	0.0387	0.0364	0.0281	0.034	0.0334	0.0278	0.0253	0.0485	0.032	0.0211	0.0284	0.0346	0.0318	0.0292	0.0237	0.0253	0.0435	0.0314	0.0349	0.0291	0.045	0.0432	0.0367	0.0334	0.03
cg01855735	0.0427	0.0507	0.048	0.0314	0.0385	0.0403	0.059	0.0526	0.0599	0.0439	0.0729	0.0354	0.0611	0.0437	0.0506	0.0845	0.0304	0.0321	0.031	0.0535	0.0589	0.0576	0.0412	0.0549	0.0289	0.0439	0.0304	0.0393	0.0602	0.0372	0.0914	0.0716	0.1388	0.0662	0.0428	0.0407	0.063	0.0557	0.0323	0.0441	0.0457	0.0281	0.0555	0.0257	0.0542	0.037	0.0402	0.0551	0.0584
cg20495183	0.0298	0.0339	0.0193	0.0144	0.0198	0.0349	0.0447	0.0212	0.0178	0.025	0.2389	0.0283	0.023	0.0155	0.0228	0.0204	0.4195	0.0176	0.0416	0.0137	0.0214	0.0652	0.0189	0.0892	0.0508	0.0253	0.0223	0.0155	0.0262	0.0181	0.0178	0.0213	0.0226	0.0198	0.021	0.0191	0.0563	0.0291	0.0214	0.0209	0.1305	0.0163	0.024	0.0164	0.022	0.0263	0.0131	0.0372	0.0266
cg20907109	0.872	0.8093	0.9128	0.8211	0.8999	0.8819	0.6168	0.4092	0.2335	0.8187	0.3773	0.7724	0.5585	0.3714	0.8331	0.8073	0.8695	0.1335	0.9116	0.1893	0.9481	0.8234	0.5576	0.916	0.5775	0.5817	0.8555	0.402	0.9059	0.8097	0.8585	0.7971	0.7329	0.8885	0.3164	0.9032	0.9126	0.8785	0.7564	0.7688	0.4552	0.5307	0.914	0.7238	0.7801	0.8969	0.664	0.6113	0.6882
cg15979150	0.027	0.1745	0.0769	0.0857	0.1311	0.0889	0.0719	0.1378	0.2182	0.0604	0.1401	0.0471	0.1808	0.2317	0.0907	0.166	0.1511	0.1159	0.0806	0.1612	0.0561	0.2325	0.0676	0.1555	0.06993	0.0527	0.0595	0.1327	0.1466	0.0881	0.105	0.0814	0.0716	0.1327	0.0764	0.0806	0.1771	0.1745	0.1293	0.0889	0.8412	0.8363	0.2004	0.1193	0.0664	0.0741	0.0539	0.1443	0.2011
cg08538682	0.3826	0.0331	0.0165	0.0191	0.5313	0.4958	0.5954	0.6004	0.042	0.056	0.2931	0.0968	0.8002	0.8996	0.3418	0.2597	0.846	0.8619	0.4596	0.6605	0.0129	0.4534	0.5487	0.5021	0.518	0.4161	0.2215	0.2751	0.0769	0.5533	0.8174	0.4403	0.4024	0.0185	0.2672	0.1671	0.1572	0.5551	0.1786	0.7095	0.6271	0.6601	0.4365	0.6628	0.2998	0.5061	0.397	0.5266	0.7515
cg04739729	0.035	0.0441	0.0561	0.0316	0.0328	0.0289	0.0511	0.0445	0.0589	0.0535	0.0414	0.0502	0.0376	0.039	0.0456	0.0771	0.0273	0.0414	0.0672	0.0459	0.0594	0.0462	0.0551	0.0312	0.0305	0.0957	0.0488	0.0316	0.0269	0.0344	0.0303	0.0488	0.0667	0.0347	0.0457	0.0572	0.0392	0.0393	0.0287	0.033	0.7323	0.2646	0.0398	0.0314	0.0527	0.0592	0.0475	0.0477	0.0399
cg00598766	0.17	0.0759	0.0603	0.0224	0.0776	0.0402	0.0334	0.0574	0.0468	0.0378	0.0996	0.0324	0.0731	0.1468	0.045	0.0335	0.0584	0.0331	0.0415	0.054	0.0327	0.0627	0.0588	0.1041	0.0875	0.0509	0.0491	0.0408	0.036	0.0482	0.0616	0.0445	0.0502	0.0562	0.0307	0.0382	0.0387	0.0706	0.0389	0.047	0.0454	0.08	0.0692	0.0359	0.0514	0.092	0.0429	0.0417	0.0788
cg10201663	0.0102	0.0146	0.013	0.0128	0.0109	0.0093	0.0145	0.4573	0.0154	0.0147	0.0107	0.0131	0.0161	0.2248	0.0122	0.0133	0.0123	0.0125	0.0131	0.0128	0.0154	0.0144	0.0139	0.0148	0.0108	0.0122	0.0116	0.0098	0.0109	0.0123	0.0158	0.0158	0.0135	0.3598	0.0101	0.0133	0.0116	0.0152	0.0132	0.0126	0.0139	0.1995	0.0153	0.0105	0.0129	0.0135	0.0105	0.015	0.0143
cg13519536	0.0211	0.0413	0.0375	0.0394	0.0263	0.0259	0.0425	0.0423	0.0439	0.0448	0.0812	0.0288	0.0545	0.0468	0.0311	0.0396	0.0978	0.0282	0.033	0.0721	0.037	0.04	0.041	0.047	0.0287	0.0273	0.0356	0.0294	0.0375	0.0416	0.0558	0.0406	0.0447	0.0607	0.039	0.0397	0.0359	0.0564	0.029	0.0438	0.3337	0.1968	0.1004	0.0503	0.0342	0.0675	0.0357	0.1316	0.0398
cg15827779	0.2479	0.408	0.4875	0.4032	0.0854	0.0332	0.4872	0.6683	0.1248	0.1673	0.7502	0.0545	0.1229	0.8987	0.0333	0.104	0.9194	0.1648	0.0914	0.8035	0.0395	0.8473	0.1054	0.6606	0.1779	0.1721	0.2744	0.1018	0.1297	0.059	0.341	0.5758	0.2665	0.0973	0.082	0.0992	0.3626	0.4877	0.1799	0.8598	0.3835	0.8724	0.2271	0.0385	0.1723	0.2356	0.1686	0.2755	0.1126
cg25604067	0.086	0.0559	0.1694	0.0603	0.0749	0.0824	0.1198	0.0658	0.0717	0.1868	0.0662	0.0789	0.0792	0.1539	0.0954	0.0766	0.1286	0.2058	0.1348	0.0901	0.1464	0.0837	0.15	0.0646	0.0839	0.1096	0.0996	0.0607	0.1268	0.0491	0.1063	0.1489	0.1689	0.164	0.0682	0.1448	0.0543	0.0439	0.0441	0.0539	0.525	0.1816	0.1301	0.0937	0.1353	0.1743	0.1732	0.0668	0.0622
cg17950410	0.7242	0.7929	0.8878	0.5781	0.528	0.9047	0.5204	0.232	0.3254	0.5197	0.36	0.3216	0.2279	0.09	0.4396	0.457	0.7839	0.2673	0.466	0.1761	0.9158	0.8479	0.2794	0.9035	0.6183	0.4634	0.8145	0.645	0.8249	0.8376	0.7308	0.6649	0.5424	0.8986	0.6887	0.5527	0.8304	0.671	0.7302	0.3761	0.3997	0.5157	0.6108	0.2039	0.4826	0.8133	0.8949	0.4442	0.4046
cg04719112	0.8523	0.9141	0.9349	0.8429	0.9125	0.8992	0.9008	0.5213	0.8835	0.8744	0.8845	0.8632	0.5965	0.9101	0.8611	0.8037	0.7177	0.4008	0.873	0.4011	0.9223	0.6824	0.6538	0.9025	0.8152	0.876	0.8755	0.6827	0.8752	0.833	0.9476	0.8621	0.7792	0.9323	0.7678	0.9182	0.9253	0.9247	0.7746	0.6728	0.9288	0.9	0.8766	0.7315	0.8213	0.9011	0.8035	0.7533	0.7318
cg14029856	0.6453	0.5998	0.6769	0.2201	0.1807	0.8577	0.268	0.2122	0.337	0.4678	0.3216	0.7072	0.23	0.133	0.0831	0.4194	0.0995	0.2202	0.328	0.1339	0.8695	0.7333	0.1881	0.5643	0.2395	0.3342	0.4174	0.5009	0.7007	0.4271	0.4317	0.7266	0.456	0.4165	0.5831	0.5041	0.7323	0.4514	0.4677	0.1213	0.4638	0.2934	0.5071	0.2316	0.6149	0.6836	0.6024	0.5305	0.2703
cg16803522	0.0617	0.0187	0.0141	0.0125	0.0146	0.0136	0.0209	0.0206	0.0836	0.1582	0.0154	0.0148	0.0123	0.0444	0.0207	0.0191	0.0224	0.0135	0.0179	0.0176	0.0146	0.0165	0.0171	0.0189	0.0509	0.1684	0.0176	0.0118	0.0128	0.0187	0.0295	0.0128	0.0177	0.016	0.0125	0.0119	0.0184	0.0248	0.0141	0.0178	0.7138	0.1595	0.0163	0.011	0.0158	0.0198	0.0152	0.0226	0.0246
cg26357885	0.6007	0.5222	0.3949	0.6297	0.5882	0.5855	0.7232	0.7186	0.1523	0.5461	0.4543	0.64	0.7386	0.905	0.483	0.4827	0.8263	0.8846	0.1091	0.2315	0.4615	0.2463	0.6138	0.6276	0.7996	0.539	0.4688	0.408	0.2984	0.728	0.8774	0.5197	0.5123	0.4055	0.6665	0.1637	0.3733	0.432	0.3503	0.7207	0.6492	0.7043	0.6916	0.1517	0.4834	0.7621	0.5685	0.6843	0.7014
cg04415168	0.0513	0.1387	0.1149	0.0601	0.1163	0.0825	0.1928	0.1726	0.2337	0.1413	0.1064	0.0848	0.186	0.1829	0.1339	0.0887	0.3561	0.1652	0.0594	0.1003	0.0904	0.0561	0.2041	0.1929	0.1953	0.0856	0.1005	0.1106	0.0832	0.1298	0.3315	0.135	0.1265	0.0606	0.1061	0.1208	0.0556	0.2959	0.068	0.1182	0.5256	0.2983	0.1499	0.0552	0.1632	0.1533	0.1568	0.2216	0.1843
cg12582030	0.0418	0.0433	0.0435	0.0457	0.0416	0.032	0.0478	0.04	0.0445	0.0475	0.0422	0.0351	0.0397	0.0452	0.042	0.0556	0.1052	0.0352	0.0383	0.0382	0.0412	0.0508	0.0431	0.0554	0.0352	0.0446	0.0496	0.035	0.0356	0.0418	0.0475	0.056	0.053	0.0441	0.0445	0.0581	0.0386	0.0435	0.0485	0.0351	0.2824	0.0436	0.0419	0.0386	0.0484	0.0488	0.0619	0.0557	0.0445
cg25748441	0.0371	0.029	0.0747	0.145	0.0258	0.192	0.1166	0.0678	0.0497	0.3294	0.0832	0.0418	0.0737	0.7975	0.0421	0.0695	0.1652	0.0546	0.036	0.087	0.0594	0.0755	0.1152	0.5068	0.2156	0.0935	0.1565	0.2336	0.1008	0.3481	0.054	0.2956	0.2498	0.0569	0.4915	0.047	0.0614	0.0603	0.0672	0.4712	0.7797	0.662	0.0524	0.0336	0.1206	0.0899	0.3664	0.4641	0.0965
cg27272677	0.6672	0.0375	0.0191	0.0143	0.0148	0.0164	0.0206	0.0238	0.0107	0.0455	0.0633	0.0197	0.0232	0.0137	0.018	0.015	0.0214	0.0136	0.0217	0.0159	0.0213	0.0346	0.0178	0.0143	0.0304	0.019	0.0303	0.0158	0.0141	0.018	0.0132	0.055	0.0726	0.0182	0.0266	0.0288	0.0135	0.0169	0.0211	0.016	0.0192	0.0171	0.0289	0.0123	0.0413	0.0193	0.0232	0.0226	0.0175
cg22928002	0.118	0.0547	0.0527	0.0357	0.0404	0.0365	0.0471	0.0741	0.0489	0.0453	0.0283	0.0359	0.0389	0.0541	0.0483	0.0648	0.031	0.0372	0.0364	0.0496	0.0415	0.0397	0.0388	0.0445	0.052	0.0369	0.0406	0.0372	0.0281	0.0388	0.0542	0.0384	0.0405	0.0608	0.0505	0.0482	0.044	0.0372	0.0472	0.0309	0.0467	0.0443	0.0468	0.0379	0.0415	0.0483	0.0463	0.0677	0.0707
cg00464046	0.5829	0.4384	0.5107	0.6183	0.6424	0.2804	0.5773	0.5172	0.3849	0.525	0.7394	0.4281	0.5127	0.7637	0.4585	0.4165	0.7804	0.8293	0.5318	0.5432	0.3642	0.3243	0.4855	0.7762	0.659	0.5032	0.2949	0.5644	0.514	0.3791	0.7789	0.4265	0.4792	0.3269	0.5082	0.304	0.4653	0.6767	0.3413	0.5657	0.6393	0.7505	0.5994	0.2957	0.5835	0.6743	0.6021	0.7842	0.7316
cg23193365	0.0601	0.2083	0.0847	0.0888	0.1264	0.082	0.1029	0.2042	0.2738	0.0949	0.0985	0.114	0.1718	0.2801	0.1476	0.5763	0.0984	0.0888	0.0887	0.1378	0.0842	0.2754	0.0904	0.3044	0.1151	0.0702	0.0747	0.0972	0.0885	0.1797	0.1287	0.0881	0.0891	0.1986	0.108	0.1131	0.1552	0.2998	0.0901	0.2299	0.5076	0.1352	0.154	0.0745	0.1119	0.0865	0.0862	0.2948	0.1714
cg15190760	0.5672	0.8399	0.8627	0.8502	0.8779	0.9009	0.8723	0.5241	0.8294	0.9038	0.8046	0.8974	0.6115	0.5204	0.8053	0.7738	0.8721	0.549	0.9185	0.7395	0.9161	0.9018	0.6143	0.873	0.6886	0.881	0.867	0.834	0.8524	0.919	0.851	0.9139	0.7505	0.8688	0.8551	0.8628	0.8779	0.9019	0.8146	0.7969	0.8633	0.7697	0.8889	0.5908	0.906	0.8719	0.8777	0.7099	0.7478
cg02169487	0.0611	0.0782	0.0583	0.061	0.0667	0.081	0.0729	0.1071	0.0655	0.0965	0.2755	0.0622	0.0509	0.2143	0.0591	0.0671	0.089	0.0499	0.0657	0.053	0.0722	0.0729	0.0751	0.0453	0.054	0.0641	0.0597	0.0765	0.0468	0.069	0.0446	0.0995	0.0941	0.0452	0.0716	0.0593	0.0449	0.0561	0.0761	0.0441	0.2064	0.301	0.0523	0.0406	0.0646	0.1003	0.08	0.4585	0.0836
cg14385738	0.6688	0.6434	0.7367	0.8384	0.7426	0.8541	0.6428	0.794	0.8149	0.723	0.7213	0.7152	0.3472	0.8074	0.7751	0.6133	0.8884	0.8738	0.5658	0.7485	0.7351	0.245	0.8013	0.789	0.8623	0.5882	0.5292	0.6747	0.3244	0.6336	0.8529	0.6768	0.7316	0.7793	0.7645	0.6948	0.4199	0.8154	0.4904	0.5498	0.831	0.8659	0.8282	0.7696	0.8075	0.7764	0.6753	0.8164	0.7773
cg06273075	0.1467	0.5707	0.4599	0.1297	0.742	0.4293	0.2608	0.487	0.7963	0.6323	0.6194	0.4908	0.8056	0.9236	0.4042	0.2255	0.491	0.8981	0.1893	0.9022	0.6959	0.77	0.3541	0.5457	0.8133	0.4372	0.514	0.4779	0.4234	0.5308	0.0925	0.6097	0.4501	0.4632	0.6033	0.3193	0.1011	0.1384	0.2312	0.2626	0.8079	0.8352	0.8135	0.2165	0.2597	0.7783	0.5623	0.5435	0.7248
cg03148658	0.0537	0.0668	0.0345	0.0274	0.0309	0.0325	0.0319	0.0603	0.0648	0.0334	0.4002	0.0345	0.0593	0.0528	0.0452	0.0637	0.0382	0.0349	0.0424	0.0458	0.0329	0.0537	0.0336	0.0632	0.1846	0.0262	0.0321	0.0531	0.0353	0.033	0.0369	0.0335	0.0428	0.0527	0.0416	0.0358	0.0492	0.0443	0.0478	0.0479	0.0463	0.0383	0.05	0.0271	0.0367	0.0379	0.4737	0.074	0.0484
cg19901403	0.8568	0.9052	0.9035	0.6908	0.8574	0.868	0.8354	0.8787	0.8268	0.831	0.8538	0.4917	0.7314	0.8504	0.5976	0.8111	0.9025	0.7741	0.7924	0.8603	0.7229	0.2534	0.7795	0.8063	0.8036	0.8309	0.6898	0.7605	0.8757	0.8125	0.9	0.726	0.8998	0.8676	0.901	0.8269	0.8911	0.8844	0.779	0.8294	0.9223	0.8914	0.8878	0.8083	0.6936	0.6768	0.8632	0.8854	0.6737
cg22319885	0.028	0.0408	0.0298	0.0215	0.0259	0.0246	0.0245	0.0318	0.0358	0.0257	0.0246	0.0257	0.0454	0.0371	0.0284	0.0574	0.0207	0.0302	0.03	0.0434	0.0294	0.0304	0.0351	0.0344	0.0138	0.0241	0.0208	0.0293	0.0204	0.0269	0.0274	0.0256	0.0253	0.0348	0.0262	0.0272	0.0302	0.0245	0.0242	0.0311	0.0304	0.0239	0.0348	0.0212	0.0268	0.0275	0.0239	0.0378	0.0352
cg01581974	0.098	0.0732	0.0899	0.0728	0.0668	0.0872	0.0633	0.0752	0.0852	0.0809	0.0654	0.0457	0.1034	0.4619	0.0701	0.0837	0.0783	0.0726	0.0502	0.0904	0.0552	0.0682	0.0723	0.0764	0.1195	0.0616	0.0673	0.2797	0.0689	0.0686	0.0557	0.1034	0.127	0.06	0.3405	0.0707	0.0544	0.0716	0.0735	0.0518	0.2528	0.3996	0.0654	0.0665	0.0779	0.078	0.0818	0.1215	0.07
cg03562120	0.792	0.8755	0.8846	0.8192	0.642	0.8559	0.7478	0.368	0.9172	0.8775	0.8799	0.6975	0.402	0.6375	0.8128	0.7898	0.9119	0.16	0.5381	0.4326	0.9319	0.7545	0.6802	0.7983	0.8668	0.6053	0.7737	0.8071	0.3926	0.8915	0.9385	0.7869	0.7875	0.586	0.7682	0.8034	0.7995	0.9041	0.8178	0.7093	0.9406	0.8962	0.8384	0.8968	0.7525	0.7538	0.8196	0.7647	0.5529
cg06563589	0.0281	0.0297	0.0394	0.0281	0.0327	0.0377	0.037	0.0354	0.0373	0.0399	0.0381	0.0292	0.0387	0.029	0.0339	0.0461	0.0357	0.0301	0.0326	0.0307	0.0321	0.0246	0.0315	0.0336	0.0476	0.024	0.0307	0.0297	0.0249	0.0321	0.024	0.0339	0.0393	0.0351	0.0334	0.0366	0.0323	0.0264	0.0307	0.0232	0.0335	0.0295	0.0309	0.026	0.0337	0.0435	0.0311	0.045	0.0309
cg20038493	0.5729	0.3074	0.265	0.1056	0.1022	0.1868	0.3664	0.2125	0.2233	0.3391	0.6228	0.607	0.093	0.6004	0.0985	0.1264	0.5336	0.6794	0.1137	0.729	0.3427	0.5425	0.7296	0.3156	0.5712	0.0962	0.4361	0.2136	0.0781	0.3896	0.5939	0.3425	0.4522	0.4137	0.5523	0.5174	0.2391	0.1732	0.1374	0.2079	0.5941	0.6949	0.2054	0.0726	0.6836	0.443	0.3993	0.4513	0.5808
cg25300386	0.0304	0.0337	0.0806	0.0285	0.045	0.1125	0.0626	0.0621	0.0317	0.1333	0.0974	0.0445	0.1121	0.103	0.0417	0.0585	0.0748	0.0346	0.0428	0.327	0.0464	0.031	0.0995	0.2292	0.0472	0.0552	0.0501	0.0661	0.0322	0.048	0.0555	0.0905	0.094	0.0351	0.1477	0.0536	0.0394	0.1533	0.0528	0.0729	0.321	0.0839	0.0667	0.0324	0.0813	0.1895	0.0865	0.0601	0.0576
cg03389111	0.0399	0.0792	0.0429	0.0335	0.0454	0.0317	0.0644	0.066	0.0456	0.0491	0.0279	0.0402	0.0544	0.0467	0.0594	0.0588	0.0611	0.0281	0.0332	0.0421	0.0403	0.0441	0.0511	0.0475	0.022	0.0332	0.0354	0.0425	0.0391	0.0437	0.0405	0.0419	0.0539	0.0619	0.0294	0.0485	0.046	0.0483	0.0345	0.041	0.0468	0.0453	0.0382	0.0302	0.0486	0.0445	0.0368	0.0689	0.0455
cg21655830	0.502	0.3766	0.3136	0.3623	0.4281	0.2245	0.4915	0.3292	0.371	0.4985	0.4096	0.3262	0.4557	0.595	0.3263	0.3974	0.663	0.4771	0.4449	0.5449	0.3062	0.2387	0.378	0.4777	0.7626	0.4203	0.427	0.4916	0.5235	0.41	0.2742	0.5273	0.6039	0.4755	0.6301	0.4717	0.4566	0.3416	0.4305	0.4368	0.8316	0.8105	0.4127	0.487	0.3316	0.4942	0.5163	0.4864	0.3247
cg12483773	0.1294	0.0807	0.0926	0.0362	0.1345	0.0974	0.1199	0.0897	0.0473	0.106	0.1388	0.0749	0.2058	0.4825	0.1	0.0937	0.1361	0.1425	0.1161	0.1344	0.0964	0.1402	0.1346	0.2156	0.0584	0.1171	0.0993	0.155	0.0848	0.1039	0.1888	0.139	0.0938	0.0638	0.1409	0.1217	0.0799	0.1078	0.0553	0.1882	0.7183	0.4255	0.0766	0.0911	0.092	0.1448	0.1452	0.1584	0.1952
cg27418586	0.0138	0.0315	0.0166	0.0105	0.0134	0.0101	0.0155	0.0257	0.0123	0.0185	0.0168	0.0198	0.0162	0.0153	0.0218	0.0169	0.0202	0.0126	0.02	0.0139	0.0154	0.0176	0.0196	0.0183	0.0116	0.0174	0.0157	0.0135	0.0125	0.0197	0.0149	0.0158	0.0166	0.0188	0.0136	0.015	0.0134	0.015	0.0165	0.0165	0.0157	0.0118	0.0149	0.0111	0.0154	0.019	0.0132	0.0222	0.0148
cg02210151	0.4896	0.5037	0.3318	0.3278	0.3749	0.4096	0.4407	0.5152	0.0935	0.4089	0.5648	0.2977	0.7553	0.7341	0.4174	0.3979	0.248	0.8579	0.3013	0.892	0.3568	0.6445	0.7047	0.3301	0.2542	0.4944	0.5236	0.4798	0.6092	0.3099	0.3157	0.4979	0.5826	0.3286	0.8366	0.4025	0.5362	0.2356	0.1853	0.7037	0.8761	0.8617	0.3992	0.6797	0.4732	0.574	0.4607	0.5719	0.3277
cg08763292	0.082	0.0741	0.06	0.0683	0.0633	0.0361	0.0453	0.0511	0.0729	0.0452	0.0743	0.0324	0.0775	0.3723	0.0435	0.0708	0.2802	0.0511	0.098	0.0399	0.042	0.1091	0.0571	0.2137	0.0308	0.2294	0.0513	0.0524	0.068	0.0525	0.0489	0.0699	0.0719	0.0485	0.0291	0.0672	0.0429	0.0452	0.0384	0.0591	0.6103	0.1787	0.0789	0.0313	0.0339	0.0562	0.0924	0.0599	0.102
cg15245951	0.0435	0.0687	0.089	0.0512	0.039	0.0489	0.0994	0.0417	0.0481	0.067	0.0331	0.1137	0.0419	0.0465	0.07	0.0555	0.0693	0.0499	0.0939	0.0475	0.0794	0.0309	0.0694	0.0431	0.2117	0.0692	0.0853	0.0444	0.1017	0.0362	0.0457	0.0704	0.0805	0.0374	0.0371	0.1069	0.0619	0.0479	0.0402	0.0496	0.0528	0.0564	0.0508	0.0492	0.0658	0.1164	0.0954	0.0519	0.0537
cg04243581	0.1021	0.084	0.0801	0.029	0.0525	0.0864	0.0955	0.0813	0.086	0.0748	0.3472	0.0572	0.0514	0.0845	0.0628	0.0562	0.0593	0.0881	0.0693	0.0604	0.0754	0.0503	0.1007	0.0509	0.0393	0.0494	0.0791	0.0477	0.0657	0.0609	0.076	0.101	0.08	0.0425	0.0506	0.0859	0.0465	0.0576	0.0603	0.0569	0.0869	0.0967	0.0658	0.0548	0.0642	0.0811	0.0705	0.0574	0.0641
cg11621808	0.0417	0.0466	0.0461	0.0362	0.0385	0.0329	0.0465	0.0533	0.0408	0.0554	0.042	0.051	0.054	0.047	0.0378	0.0544	0.0377	0.043	0.0346	0.0384	0.044	0.0465	0.0644	0.0362	0.0287	0.0358	0.0406	0.0544	0.0551	0.0346	0.0308	0.0765	0.094	0.0407	0.054	0.0492	0.0434	0.0474	0.0509	0.0371	0.05	0.032	0.0387	0.0345	0.0652	0.062	0.0382	0.0785	0.0438
cg23077029	0.3668	0.2457	0.4296	0.3517	0.5742	0.7027	0.6077	0.3002	0.6693	0.3339	0.6326	0.2364	0.4013	0.3391	0.2307	0.1539	0.3047	0.7381	0.1379	0.1205	0.1616	0.3861	0.173	0.1881	0.2921	0.1453	0.2321	0.2725	0.2253	0.092	0.1423	0.2132	0.438	0.1014	0.2709	0.3284	0.3884	0.1166	0.2438	0.2378	0.7609	0.6155	0.1316	0.1162	0.2674	0.4932	0.4588	0.4313	0.2035
cg03584288	0.0427	0.0617	0.0727	0.0186	0.0262	0.0442	0.0855	0.0878	0.0491	0.1239	0.0393	0.0822	0.0434	0.0293	0.0347	0.04	0.0381	0.0213	0.1196	0.0445	0.0939	0.1046	0.121	0.049	0.0298	0.1491	0.09	0.0261	0.0364	0.0514	0.0356	0.118	0.0994	0.0397	0.0178	0.0746	0.0654	0.0588	0.0293	0.041	0.0834	0.0488	0.0488	0.0146	0.0858	0.1282	0.08	0.0351	0.0264
cg13491250	0.2075	0.5055	0.4581	0.157	0.4274	0.6185	0.4776	0.4047	0.501	0.2363	0.6	0.2731	0.4222	0.7646	0.4668	0.432	0.4752	0.3385	0.1183	0.3725	0.5035	0.5527	0.2658	0.3032	0.4271	0.4804	0.1106	0.3322	0.2723	0.2826	0.5228	0.416	0.2415	0.4374	0.3876	0.4236	0.3913	0.4699	0.1766	0.6804	0.6652	0.6351	0.4556	0.4844	0.4011	0.5023	0.5024	0.5816	0.2623
cg09396196	0.0306	0.0313	0.0197	0.0149	0.0131	0.2517	0.0424	0.0394	0.0147	0.0185	0.3703	0.0211	0.0245	0.0165	0.0247	0.0202	0.1628	0.0133	0.0161	0.0156	0.0188	0.02	0.0281	0.021	0.0514	0.0785	0.0197	0.0163	0.0369	0.0266	0.0169	0.0192	0.021	0.019	0.0111	0.0238	0.018	0.018	0.0149	0.192	0.0821	0.0163	0.02	0.0127	0.0175	0.0224	0.0197	0.0968	0.0168
cg19734015	0.0854	0.0788	0.0327	0.0363	0.036	0.0309	0.0239	0.628	0.0521	0.0527	0.0315	0.0252	0.0424	0.0369	0.0452	0.0497	0.0376	0.0344	0.0268	0.0467	0.0264	0.0302	0.0274	0.0329	0.1696	0.0278	0.0268	0.0409	0.0665	0.0239	0.0425	0.0223	0.0251	0.0354	0.0353	0.0248	0.0433	0.0254	0.2518	0.0289	0.0321	0.0665	0.0413	0.0283	0.0226	0.0223	0.0298	0.0755	0.0339
cg04160030	0.2297	0.8512	0.7029	0.1311	0.7346	0.4568	0.9075	0.8267	0.2619	0.6916	0.8834	0.2883	0.2297	0.6806	0.5233	0.7445	0.9212	0.7382	0.3449	0.1778	0.6667	0.3543	0.6144	0.8791	0.2187	0.1662	0.8135	0.8605	0.6283	0.9028	0.7285	0.8398	0.4553	0.7051	0.8479	0.8762	0.817	0.659	0.2618	0.3016	0.9261	0.86	0.3622	0.8701	0.1409	0.925	0.8925	0.6981	0.8633
cg26114124	0.6576	0.709	0.4269	0.8059	0.6758	0.2355	0.1409	0.9431	0.7269	0.1938	0.8327	0.3502	0.0679	0.983	0.0923	0.5306	0.7254	0.1143	0.2308	0.4182	0.2681	0.2875	0.6196	0.6273	0.7571	0.4584	0.1946	0.2628	0.5201	0.4361	0.912	0.3366	0.5842	0.5868	0.5969	0.612	0.3442	0.2248	0.8019	0.638	0.8407	0.932	0.861	0.0193	0.6354	0.2865	0.3951	0.8247	0.8443
cg23549179	0.8599	0.8712	0.8684	0.7625	0.9087	0.8593	0.8079	0.1615	0.7717	0.6377	0.3997	0.7143	0.6046	0.3874	0.8027	0.3919	0.4974	0.1792	0.6329	0.2919	0.6164	0.6597	0.3911	0.9066	0.511	0.7458	0.7675	0.5296	0.8702	0.7749	0.5086	0.7337	0.6969	0.7885	0.4581	0.8217	0.9153	0.9205	0.6596	0.6919	0.9117	0.789	0.6768	0.3176	0.406	0.8911	0.8748	0.6078	0.2194
cg18113084	0.1329	0.0908	0.0462	0.0369	0.0758	0.0656	0.1257	0.1084	0.0769	0.0544	0.297	0.087	0.165	0.4744	0.1077	0.0716	0.4325	0.2061	0.0734	0.1285	0.0531	0.0543	0.0732	0.1035	0.12	0.0722	0.057	0.1242	0.0676	0.0926	0.0576	0.0995	0.1452	0.0586	0.1786	0.0536	0.0471	0.077	0.0622	0.205	0.7151	0.5287	0.0615	0.0716	0.1001	0.0926	0.0647	0.122	0.2492
cg08099174	0.0702	0.0982	0.074	0.0562	0.0594	0.0481	0.0723	0.0816	0.0449	0.0567	0.0549	0.0527	0.0818	0.21	0.0651	0.0589	0.0433	0.0325	0.0591	0.0811	0.0544	0.0412	0.0509	0.0681	0.0583	0.0482	0.0409	0.0408	0.058	0.0613	0.0606	0.0422	0.0593	0.0604	0.0542	0.0581	0.0708	0.0639	0.0552	0.0569	0.0503	0.0413	0.0743	0.0448	0.0494	0.0764	0.0614	0.0888	0.0553
cg00447833	0.0414	0.1238	0.0963	0.0556	0.0587	0.0553	0.0607	0.1167	0.09	0.1596	0.1506	0.0564	0.0793	0.052	0.0698	0.1215	0.19	0.0362	0.0637	0.0552	0.0471	0.0504	0.0603	0.1938	0.074	0.0437	0.0455	0.0491	0.0577	0.0433	0.0518	0.0661	0.0654	0.0633	0.0495	0.0584	0.0686	0.0932	0.0451	0.0495	0.7927	0.5363	0.0628	0.0426	0.0519	0.0648	0.0671	0.1784	0.0456
cg22131825	0.0252	0.0353	0.0563	0.0299	0.0231	0.0355	0.0379	0.0589	0.0427	0.0459	0.0403	0.0322	0.0489	0.8737	0.0486	0.0375	0.0607	0.0539	0.0352	0.0355	0.0633	0.0301	0.0685	0.0597	0.0373	0.0466	0.042	0.0525	0.0316	0.0352	0.0421	0.0445	0.0425	0.0324	0.0951	0.0368	0.0283	0.0351	0.0326	0.0353	0.6731	0.5997	0.0311	0.0207	0.0532	0.042	0.0458	0.0792	0.0425
cg20111643	0.0318	0.0296	0.0173	0.0196	0.0173	0.0136	0.0191	0.0248	0.0185	0.0239	0.0113	0.0251	0.0277	0.9449	0.0225	0.0182	0.0144	0.0124	0.0166	0.0282	0.0169	0.0235	0.0238	0.0535	0.1127	0.0193	0.0224	0.0149	0.0133	0.0258	0.029	0.021	0.0186	0.0332	0.019	0.0165	0.0302	0.024	0.0147	0.0229	0.739	0.6321	0.0217	0.0132	0.0238	0.018	0.0194	0.0207	0.04
cg00713925	0.0464	0.0404	0.0496	0.0281	0.0422	0.0297	0.0453	0.038	0.0284	0.0299	0.0594	0.0321	0.1002	0.0366	0.0428	0.0356	0.0491	0.1307	0.039	0.2234	0.0356	0.0321	0.0651	0.0281	0.0489	0.0342	0.0311	0.0628	0.0376	0.0274	0.0477	0.0442	0.0459	0.0248	0.0987	0.0472	0.0397	0.0363	0.0273	0.0415	0.4999	0.1093	0.0295	0.0419	0.0319	0.0382	0.0415	0.0428	0.0778
cg14265670	0.0698	0.0642	0.0703	0.0392	0.0392	0.0432	0.0719	0.0788	0.0823	0.0643	0.0465	0.0541	0.039	0.3328	0.0852	0.0492	0.0858	0.0422	0.0494	0.0288	0.0846	0.0451	0.0785	0.046	0.0416	0.0521	0.0531	0.0403	0.0347	0.0517	0.0442	0.0703	0.0819	0.0365	0.0318	0.0663	0.0423	0.0294	0.0363	0.0452	0.2261	0.2652	0.0495	0.0421	0.0685	0.0677	0.0647	0.0731	0.0722
cg12433395	0.4063	0.4366	0.2545	0.2575	0.6851	0.7252	0.6724	0.2136	0.323	0.5526	0.6056	0.61	0.3051	0.7558	0.4484	0.334	0.7758	0.3958	0.1329	0.0938	0.1421	0.5581	0.36	0.6346	0.5203	0.6281	0.4246	0.4741	0.3669	0.5278	0.6509	0.5733	0.3493	0.1258	0.0963	0.5093	0.4521	0.6225	0.3128	0.6783	0.7876	0.7228	0.6416	0.2082	0.4531	0.3811	0.6258	0.6182	0.7419
cg05897918	0.0573	0.0478	0.0535	0.0495	0.058	0.038	0.0543	0.0681	0.0713	0.042	0.0507	0.0424	0.0717	0.0551	0.0446	0.0578	0.0389	0.0335	0.0412	0.0478	0.0629	0.0843	0.0475	0.0655	0.0242	0.0414	0.0408	0.0374	0.0411	0.0512	0.0463	0.0434	0.0533	0.0878	0.0466	0.0508	0.053	0.0614	0.0387	0.0466	0.0534	0.044	0.0654	0.0512	0.0488	0.0695	0.0593	0.0577	0.0473
cg25497938	0.9217	0.8905	0.904	0.8907	0.8567	0.8905	0.8424	0.8188	0.8931	0.9033	0.897	0.8299	0.8042	0.8993	0.8938	0.8659	0.907	0.8738	0.8615	0.8861	0.9104	0.9247	0.8179	0.9371	0.7075	0.8673	0.8843	0.9041	0.7782	0.9196	0.9184	0.8948	0.9243	0.92	0.7156	0.8644	0.9105	0.9283	0.8544	0.9237	0.9192	0.9314	0.9381	0.7591	0.8892	0.8814	0.8935	0.9085	0.9123
cg12354321	0.3201	0.8041	0.6428	0.3661	0.3312	0.72	0.6036	0.3484	0.1334	0.3849	0.3301	0.2176	0.2884	0.1148	0.0938	0.4078	0.6502	0.1004	0.3641	0.1535	0.5683	0.8997	0.2628	0.473	0.1689	0.3798	0.6262	0.4737	0.6412	0.3611	0.1227	0.3027	0.3638	0.3706	0.1688	0.4154	0.3746	0.4661	0.5565	0.202	0.3118	0.268	0.4729	0.1992	0.3433	0.4182	0.3536	0.6276	0.2326
cg26936577	0.8016	0.8996	0.8695	0.7859	0.8142	0.8203	0.689	0.4432	0.8997	0.8352	0.3899	0.796	0.2609	0.5444	0.5399	0.8793	0.852	0.5782	0.7844	0.222	0.9137	0.8521	0.5559	0.8564	0.6539	0.8099	0.8296	0.8422	0.877	0.7044	0.8383	0.6432	0.7546	0.8409	0.6908	0.8682	0.821	0.7472	0.7517	0.1793	0.6349	0.7763	0.856	0.5201	0.7614	0.6987	0.7933	0.7104	0.2387
cg24195686	0.0478	0.0368	0.0458	0.0353	0.0412	0.0326	0.0428	0.0359	0.0514	0.0535	0.0402	0.0386	0.0551	0.0587	0.0326	0.0479	0.0335	0.0348	0.0366	0.0446	0.0625	0.0358	0.0527	0.0353	0.023	0.031	0.0381	0.0437	0.0347	0.0469	0.0538	0.0414	0.0514	0.0565	0.0354	0.0517	0.0423	0.0426	0.0383	0.0412	0.0431	0.0432	0.0445	0.0343	0.041	0.0439	0.0513	0.0379	0.0471
cg26509022	0.1497	0.5013	0.0613	0.7982	0.1256	0.0794	0.2177	0.4605	0.739	0.0504	0.7972	0.0707	0.499	0.9485	0.029	0.0911	0.4049	0.9481	0.0234	0.043	0.0425	0.4824	0.3829	0.5543	0.2423	0.0527	0.2826	0.0581	0.2646	0.0325	0.3376	0.0605	0.1264	0.0669	0.7212	0.0937	0.0789	0.0515	0.1374	0.0215	0.8257	0.8188	0.7106	0.0308	0.5554	0.0855	0.0363	0.1493	0.2159
cg24980367	0.1968	0.3348	0.41	0.3252	0.1665	0.3862	0.2352	0.4833	0.7267	0.1246	0.1406	0.3488	0.3542	0.8526	0.3783	0.2706	0.4045	0.3513	0.2224	0.4125	0.156	0.2424	0.1667	0.1945	0.2116	0.3217	0.3406	0.2679	0.1039	0.161	0.4426	0.1472	0.2275	0.4351	0.2988	0.1933	0.2819	0.2886	0.1706	0.1791	0.6863	0.4497	0.3646	0.3023	0.1267	0.4217	0.1287	0.356	0.5229
cg26521784	0.0184	0.0275	0.0161	0.0149	0.0156	0.0128	0.0218	0.0563	0.0139	0.0223	0.0214	0.0207	0.0189	0.0162	0.0243	0.0169	0.0146	0.018	0.0215	0.0204	0.0204	0.0178	0.0224	0.0161	0.0205	0.0182	0.0176	0.0185	0.0107	0.0175	0.0172	0.0226	0.0268	0.0222	0.0138	0.0216	0.0178	0.0167	0.0155	0.0197	0.0264	0.0135	0.0191	0.0135	0.0184	0.0235	0.0171	0.025	0.0196
cg08596549	0.0382	0.0447	0.0508	0.0527	0.0529	0.0477	0.048	0.0503	0.0942	0.0518	0.0402	0.039	0.0778	0.0479	0.0478	0.0608	0.0619	0.0491	0.0433	0.0613	0.0434	0.0601	0.0462	0.0516	0.0351	0.038	0.0389	0.0524	0.0557	0.0416	0.0866	0.0616	0.0626	0.0599	0.0615	0.0415	0.0507	0.0598	0.0551	0.0498	0.4451	0.1682	0.057	0.0408	0.0536	0.0472	0.0534	0.0472	0.0707
cg08596544	0.1161	0.0355	0.0418	0.0301	0.0408	0.0395	0.0661	0.0425	0.0613	0.0672	0.0278	0.0346	0.0333	0.0408	0.0363	0.0416	0.0337	0.0235	0.0412	0.0359	0.0547	0.0447	0.0539	0.0299	0.0831	0.0433	0.0548	0.0309	0.0552	0.0362	0.0315	0.0389	0.0886	0.1046	0.0674	0.0539	0.0317	0.0329	0.0292	0.0569	0.0552	0.0318	0.0299	0.0223	0.0755	0.063	0.0577	0.0394	0.0402
cg19446838	0.0653	0.049	0.0963	0.0279	0.0275	0.0503	0.075	0.0564	0.0666	0.2099	0.0559	0.0895	0.0678	0.8394	0.0453	0.0601	0.0332	0.037	0.069	0.0588	0.0772	0.0446	0.0863	0.0677	0.0507	0.0553	0.0471	0.0327	0.0277	0.0433	0.0274	0.0791	0.0677	0.0431	0.0372	0.0776	0.0406	0.0452	0.0406	0.0458	0.3194	0.1656	0.0444	0.0382	0.0808	0.0919	0.0747	0.0867	0.0394
cg19918230	0.2004	0.2366	0.1431	0.1398	0.2966	0.1238	0.3546	0.2508	0.4964	0.2542	0.4269	0.1062	0.2112	0.832	0.1003	0.1382	0.3669	0.1473	0.1611	0.2142	0.1592	0.3963	0.1736	0.2488	0.2825	0.3635	0.4154	0.338	0.1563	0.4275	0.3267	0.2764	0.3	0.0942	0.1741	0.2063	0.1399	0.2433	0.1813	0.2212	0.5388	0.5386	0.1966	0.2325	0.1507	0.1989	0.2372	0.2291	0.1572
cg01181009	0.4188	0.5845	0.6851	0.5143	0.5789	0.7425	0.3589	0.4951	0.3193	0.5305	0.4017	0.3957	0.4711	0.8509	0.4531	0.4974	0.8791	0.843	0.1591	0.5374	0.4512	0.2172	0.7798	0.6784	0.3015	0.5422	0.5374	0.5425	0.2979	0.4694	0.4248	0.5839	0.4152	0.668	0.4388	0.169	0.6727	0.7978	0.2915	0.2514	0.8063	0.8323	0.5536	0.4743	0.2278	0.4545	0.422	0.6284	0.5493
cg04754315	0.0928	0.0615	0.0302	0.0259	0.4012	0.0251	0.3509	0.0431	0.1116	0.0393	0.3564	0.1011	0.1469	0.8491	0.1814	0.0751	0.755	0.2571	0.1207	0.056	0.0684	0.1366	0.1115	0.388	0.3394	0.0282	0.0531	0.0348	0.1112	0.0367	0.0434	0.1438	0.0935	0.089	0.3853	0.0885	0.038	0.0917	0.0415	0.3515	0.4359	0.2235	0.1032	0.0272	0.1049	0.1938	0.2091	0.0593	0.2743
cg20030711	0.2329	0.4049	0.3501	0.2931	0.232	0.4256	0.2019	0.2707	0.2091	0.6356	0.2756	0.2054	0.2403	0.5074	0.1637	0.3591	0.6476	0.2972	0.3119	0.2056	0.6166	0.2198	0.2508	0.2861	0.0391	0.3007	0.3108	0.5223	0.2322	0.3175	0.2657	0.3837	0.467	0.2102	0.2917	0.4241	0.1826	0.2272	0.446	0.1578	0.8988	0.8575	0.3241	0.2609	0.3054	0.2442	0.553	0.4602	0.2469
cg07058109	0.8286	0.1763	0.0966	0.054	0.1127	0.1394	0.197	0.2737	0.1602	0.1075	0.4515	0.1241	0.4774	0.5604	0.1917	0.211	0.7349	0.2808	0.0755	0.2364	0.083	0.0546	0.3343	0.4804	0.0612	0.1308	0.0874	0.1679	0.0599	0.144	0.2495	0.1029	0.2633	0.0848	0.5699	0.0669	0.1303	0.3661	0.1502	0.2032	0.7598	0.7135	0.0903	0.0793	0.2264	0.1741	0.1162	0.4065	0.1855
cg01608030	0.0454	0.0764	0.1416	0.0655	0.0953	0.0761	0.1363	0.0726	0.0565	0.1586	0.0735	0.1126	0.1298	0.0833	0.0559	0.1142	0.066	0.0576	0.1546	0.0915	0.1543	0.0913	0.1302	0.0505	0.4723	0.1006	0.1406	0.0639	0.0855	0.1253	0.0918	0.1221	0.1496	0.0663	0.0597	0.179	0.0535	0.0782	0.0604	0.0534	0.1194	0.0615	0.0665	0.0543	0.1491	0.1588	0.1223	0.0856	0.0533
cg24226590	0.7353	0.7182	0.7445	0.5255	0.6103	0.83	0.8099	0.4748	0.6715	0.6145	0.8256	0.6993	0.6653	0.6203	0.5869	0.6385	0.8273	0.4472	0.7393	0.6004	0.864	0.8118	0.5463	0.755	0.6974	0.6041	0.7611	0.5778	0.6975	0.7766	0.8018	0.6288	0.5921	0.742	0.5533	0.7476	0.5974	0.7838	0.6302	0.5907	0.9197	0.6062	0.8337	0.514	0.5288	0.8035	0.7472	0.6472	0.4755
cg00591844	0.172	0.0313	0.0358	0.0263	0.0286	0.0284	0.109	0.0297	0.0241	0.0401	0.0462	0.0288	0.2707	0.9443	0.0242	0.0346	0.0418	0.5139	0.0308	0.0309	0.0378	0.0397	0.0288	0.0435	0.0225	0.0333	0.0297	0.0259	0.0206	0.0326	0.0395	0.0348	0.0387	0.0343	0.2725	0.0322	0.0329	0.0349	0.0324	0.0353	0.1214	0.6577	0.0405	0.0201	0.0461	0.0481	0.1178	0.0422	0.0355
cg20730894	0.0353	0.043	0.0508	0.0399	0.0302	0.032	0.0386	0.0666	0.0469	0.0445	0.0388	0.0339	0.0486	0.0472	0.0459	0.058	0.0353	0.0405	0.0361	0.0404	0.0406	0.0646	0.0387	0.0492	0.0245	0.0352	0.0446	0.04	0.0262	0.0425	0.0386	0.0479	0.0603	0.05	0.0329	0.065	0.0396	0.0695	0.0319	0.0462	0.0499	0.0405	0.0572	0.038	0.0391	0.0495	0.0444	0.0639	0.0446
cg24857117	0.0564	0.0348	0.0381	0.038	0.0358	0.0418	0.0379	0.0468	0.0595	0.0393	0.0484	0.0279	0.0456	0.0558	0.0331	0.0473	0.0609	0.0485	0.0356	0.0509	0.0314	0.0445	0.0405	0.0337	0.0413	0.0261	0.0325	0.0418	0.0268	0.0287	0.0506	0.0369	0.0367	0.0563	0.0359	0.0508	0.0442	0.0407	0.0313	0.0516	0.0426	0.0437	0.0366	0.0443	0.0432	0.0441	0.0427	0.0386	0.0455
cg22628840	0.017	0.0326	0.0405	0.035	0.0391	0.0292	0.0374	0.0256	0.0362	0.0343	0.0347	0.0415	0.0345	0.0338	0.0266	0.0265	0.0297	0.0256	0.0369	0.0194	0.0371	0.033	0.0302	0.0283	0.0444	0.0332	0.02	0.0238	0.0274	0.0405	0.0277	0.0368	0.0325	0.0348	0.0278	0.0355	0.0216	0.034	0.0255	0.0304	0.0335	0.0307	0.0322	0.0193	0.0538	0.0458	0.0379	0.0284	0.0327
cg15106452	0.7259	0.8623	0.8551	0.7085	0.7683	0.7317	0.8614	0.4103	0.928	0.7933	0.8283	0.8464	0.5147	0.7755	0.6741	0.8053	0.8585	0.2633	0.8527	0.4692	0.931	0.9297	0.5163	0.8859	0.764	0.7984	0.8332	0.5995	0.8785	0.7617	0.7988	0.7384	0.5212	0.878	0.7342	0.9169	0.8275	0.8588	0.7832	0.4879	0.8513	0.6678	0.8165	0.4838	0.659	0.8119	0.7958	0.5291	0.6517
cg26246897	0.054	0.0232	0.0171	0.0165	0.0158	0.0161	0.0201	0.0235	0.0198	0.0206	0.6578	0.0225	0.0896	0.9589	0.0182	0.0177	0.0876	0.0178	0.0207	0.0186	0.018	0.0217	0.0203	0.1088	0.0667	0.0213	0.0202	0.0159	0.0185	0.0188	0.0171	0.019	0.0202	0.0228	0.025	0.0165	0.022	0.0177	0.0179	0.0202	0.8068	0.7497	0.0274	0.0173	0.0166	0.0226	0.1895	0.0275	0.0201
cg04517747	0.8582	0.8805	0.9456	0.8897	0.9087	0.9202	0.8966	0.8201	0.884	0.9453	0.8943	0.9432	0.9012	0.8105	0.9047	0.8685	0.9179	0.8802	0.9034	0.8972	0.949	0.8745	0.9114	0.9427	0.9025	0.9005	0.8861	0.8177	0.8722	0.9388	0.9152	0.9499	0.9395	0.9097	0.875	0.915	0.8922	0.9454	0.8479	0.954	0.9307	0.7421	0.9218	0.8906	0.9258	0.9079	0.9474	0.8421	0.744
cg22541911	0.0395	0.0164	0.0202	0.0155	0.016	0.0165	0.0204	0.0188	0.0189	0.0178	0.0372	0.0236	0.0223	0.0417	0.0166	0.0248	0.0178	0.014	0.0168	0.0204	0.0145	0.0244	0.0133	0.0331	0.1949	0.025	0.0213	0.0177	0.016	0.024	0.0196	0.0165	0.0148	0.0248	0.0146	0.0165	0.0239	0.0234	0.018	0.0279	0.0834	0.0181	0.0161	0.0156	0.0122	0.0194	0.0168	0.0185	0.024
cg16741710	0.0454	0.0718	0.0625	0.0231	0.0297	0.0786	0.0521	0.0513	0.0354	0.1554	0.0562	0.0568	0.0289	0.5563	0.0319	0.1853	0.0386	0.0794	0.0364	0.0288	0.0467	0.0874	0.0367	0.0463	0.4323	0.0426	0.0536	0.0383	0.1475	0.0316	0.038	0.0704	0.0711	0.0362	0.0269	0.0482	0.1041	0.033	0.0465	0.0342	0.7922	0.3531	0.0339	0.033	0.0821	0.0481	0.0865	0.0462	0.0349
cg27323049	0.0796	0.0355	0.057	0.0329	0.0562	0.0652	0.0571	0.0501	0.0899	0.0421	0.0593	0.0448	0.0753	0.2931	0.0539	0.0631	0.0834	0.0422	0.0526	0.038	0.0562	0.0459	0.0714	0.1442	0.0371	0.0441	0.0363	0.0508	0.0481	0.0592	0.0491	0.0551	0.043	0.0322	0.0349	0.0599	0.0586	0.0582	0.0423	0.0454	0.4148	0.0884	0.0838	0.0414	0.0559	0.0781	0.0457	0.2627	0.0429
cg08235413	0.8207	0.8295	0.8448	0.7866	0.8301	0.7789	0.8273	0.8434	0.8517	0.8521	0.6108	0.8279	0.8668	0.2356	0.4942	0.7846	0.7669	0.7882	0.8284	0.8695	0.8848	0.85	0.7832	0.8389	0.8302	0.6743	0.8113	0.6899	0.8321	0.8834	0.8281	0.8638	0.8524	0.8638	0.8765	0.4706	0.8358	0.8423	0.7457	0.8774	0.5986	0.7214	0.8397	0.786	0.7752	0.8862	0.8911	0.6997	0.5429
cg14184817	0.5282	0.5318	0.7362	0.9397	0.3797	0.6994	0.2704	0.7147	0.6747	0.5178	0.9565	0.4943	0.4573	0.3208	0.1072	0.742	0.2141	0.1755	0.7808	0.261	0.5728	0.7984	0.9501	0.7448	0.9281	0.4614	0.5332	0.7225	0.8748	0.6411	0.3853	0.8962	0.415	0.3112	0.3398	0.767	0.6784	0.6407	0.8038	0.9585	0.6483	0.9467	0.3924	0.3167	0.4787	0.6936	0.5521	0.2208	0.9528
cg10197546	0.0278	0.0337	0.0325	0.0206	0.023	0.0206	0.0325	0.0705	0.0326	0.0329	0.0247	0.0296	0.0344	0.0311	0.0264	0.0418	0.0248	0.0402	0.0305	0.0577	0.0374	0.0344	0.0418	0.0333	0.0347	0.0331	0.0309	0.0235	0.02	0.0307	0.0299	0.032	0.0375	0.0362	0.0359	0.0299	0.0324	0.0297	0.0207	0.028	0.0333	0.0257	0.0321	0.0183	0.0324	0.0384	0.0351	0.0349	0.0378
cg02333555	0.2997	0.2078	0.1485	0.2758	0.4401	0.2984	0.1711	0.2303	0.386	0.2568	0.2729	0.194	0.4984	0.5025	0.2033	0.28532	0.3228	0.4075	0.1939	0.4694	0.1062	0.4933	0.2119	0.4636	0.0606	0.1464	0.1032	0.427	0.4131	0.4248	0.5635	0.221	0.2036	0.4348	0.2673	0.2117	0.3542	0.4466	0.3605	0.306	0.4592	0.5354	0.485	0.3507	0.1987	0.2238	0.1545	0.2188	0.4718
cg16891895	0.0311	0.0374	0.0357	0.0262	0.0274	0.0273	0.0633	0.039	0.0193	0.0641	0.0262	0.0357	0.0312	0.0734	0.036	0.0289	0.0204	0.0322	0.0335	0.0358	0.04	0.0272	0.037	0.0263	0.0303	0.0292	0.0349	0.0396	0.0194	0.0261	0.0297	0.0292	0.046	0.0391	0.0247	0.0405	0.0392	0.0328	0.0378	0.064	0.1003	0.1527	0.0427	0.0223	0.0304	0.0483	0.0488	0.0601	0.0342
cg00813993	0.4756	0.3911	0.5537	0.3921	0.5214	0.256	0.3953	0.3064	0.3808	0.5396	0.2041	0.6319	0.3939	0.1487	0.1867	0.3071	0.676	0.3131	0.501	0.3391	0.4261	0.2846	0.3822	0.4205	0.4297	0.3509	0.4889	0.2479	0.231	0.4033	0.5721	0.4504	0.3637	0.216	0.5115	0.4709	0.3003	0.4148	0.2874	0.2476	0.4079	0.5215	0.6026	0.5043	0.4037	0.4175	0.3924	0.3451	0.2215
cg05541640	0.1485	0.2131	0.1675	0.0634	0.271	0.0992	0.2684	0.0749	0.1168	0.1397	0.4211	0.1099	0.2542	0.0704	0.2266	0.2082	0.6121	0.2492	0.1238	0.1382	0.1237	0.0784	0.2196	0.2528	0.1588	0.2675	0.1561	0.2601	0.273	0.1408	0.2138	0.2065	0.2114	0.1506	0.1311	0.1123	0.0961	0.1228	0.0928	0.13	0.4423	0.1686	0.1715	0.2062	0.1193	0.2286	0.2217	0.2514	0.4063
cg21166330	0.7371	0.6302	0.7235	0.3677	0.7003	0.8042	0.6493	0.2735	0.8461	0.6266	0.4077	0.6661	0.6299	0.2641	0.4636	0.5847	0.8086	0.3444	0.7628	0.3646	0.8354	0.7554	0.6354	0.7771	0.4701	0.4979	0.7314	0.544	0.7984	0.8043	0.7591	0.6708	0.6399	0.6913	0.646	0.6802	0.7361	0.7239	0.4972	0.5132	0.3788	0.3257	0.8099	0.3329	0.4872	0.6489	0.7636	0.4657	0.3328
cg16842643	0.1295	0.1362	0.0699	0.0567	0.0698	0.0748	0.0643	0.1313	0.0918	0.1195	0.1151	0.0483	0.102	0.0492	0.055	0.2239	0.0445	0.0451	0.042	0.0554	0.0564	0.1259	0.0489	0.0733	0.0277	0.0477	0.0584	0.071	0.0978	0.071	0.0524	0.1404	0.0704	0.0848	0.0628	0.0987	0.0647	0.071	0.0935	0.0607	0.0751	0.0538	0.0786	0.1106	0.0775	0.0594	0.1117	0.1035	0.0664
cg25319276	0.023	0.0286	0.0438	0.0499	0.0395	0.0311	0.0535	0.0337	0.0516	0.0416	0.0632	0.0398	0.0486	0.0755	0.0378	0.0633	0.0324	0.036	0.0295	0.0432	0.0447	0.0638	0.0365	0.0412	0.03	0.0373	0.0365	0.0367	0.0349	0.0379	0.036	0.0529	0.0501	0.0349	0.0456	0.0421	0.0377	0.0441	0.0354	0.0374	0.0483	0.0417	0.0423	0.029	0.0424	0.0497	0.0492	0.0439	0.057
cg01053621	0.7278	0.8691	0.8942	0.7604	0.6054	0.8763	0.8418	0.4791	0.8794	0.8561	0.8113	0.8056	0.7497	0.6853	0.8108	0.8514	0.7054	0.3875	0.7621	0.5005	0.9013	0.7749	0.5761	0.8858	0.5624	0.8442	0.7999	0.5284	0.7804	0.6545	0.5644	0.8244	0.5588	0.6515	0.7352	0.8083	0.758	0.9186	0.7202	0.8277	0.8657	0.8815	0.6738	0.7806	0.5282	0.8684	0.8719	0.8655	0.7177
cg07047068	0.2656	0.4144	0.4911	0.3934	0.2308	0.5999	0.6912	0.2305	0.7409	0.6551	0.5455	0.5635	0.235	0.1959	0.2864	0.4446	0.7323	0.2335	0.4508	0.3045	0.5589	0.2646	0.4606	0.3669	0.4617	0.3428	0.3411	0.3303	0.1292	0.6485	0.3048	0.4589	0.4724	0.2931	0.6873	0.327	0.1291	0.7952	0.3098	0.1815	0.658	0.647	0.6466	0.3645	0.4085	0.3399	0.4088	0.3747	0.1555
cg22669090	0.042	0.0524	0.0444	0.0388	0.0385	0.0345	0.0315	0.0993	0.0747	0.035	0.0393	0.034	0.0708	0.0611	0.0454	0.0903	0.0322	0.0455	0.031	0.0481	0.0367	0.0595	0.0583	0.0708	0.0212	0.0268	0.029	0.0328	0.0417	0.058	0.0476	0.0384	0.036	0.0669	0.0314	0.0391	0.0615	0.0656	0.0401	0.056	0.0329	0.0395	0.0493	0.0341	0.0358	0.0387	0.042	0.0619	0.0614
cg23732368	0.0171	0.0353	0.0388	0.0095	0.0138	0.0106	0.0273	0.0384	0.0139	0.0385	0.0143	0.0151	0.0195	0.1408	0.032	0.0137	0.0294	0.0153	0.0235	0.0204	0.0353	0.0449	0.0316	0.0441	0.0185	0.0299	0.0319	0.0078	0.01	0.0153	0.0219	0.0408	0.0395	0.0166	0.0088	0.0318	0.0163	0.0135	0.0103	0.0205	0.1961	0.2865	0.0286	0.013	0.0288	0.0393	0.03	0.1171	0.0178
cg26475085	0.0863	0.0654	0.0518	0.0359	0.0488	0.0622	0.0311	0.0879	0.0229	0.0437	0.0384	0.0893	0.1254	0.4357	0.026	0.0376	0.0223	0.0184	0.0366	0.0432	0.0507	0.0602	0.0425	0.4027	0.0325	0.0332	0.0572	0.0601	0.0393	0.1241	0.0259	0.2005	0.294	0.4109	0.0269	0.0396	0.025	0.0273	0.0671	0.1097	0.6682	0.3739	0.0237	0.0267	0.0903	0.0371	0.0587	0.0876	0.0253
cg00292135	0.5545	0.4395	0.5247	0.5568	0.5303	0.4922	0.0768	0.6533	0.6552	0.3818	0.2548	0.5645	0.5448	0.0165	0.0682	0.4057	0.755	0.3703	0.4953	0.021	0.4805	0.4041	0.62	0.5584	0.5321	0.5129	0.3451	0.448	0.1001	0.2095	0.5425	0.3397	0.1544	0.4797	0.0361	0.0447	0.3972	0.5338	0.4029	0.5628	0.0951	0.0258	0.4137	0.6746	0.4839	0.4918	0.0525	0.537	0.7694
cg23651323	0.01	0.0132	0.0145	0.0117	0.0126	0.009	0.0117	0.0125	0.0126	0.014	0.0108	0.0125	0.0104	0.8511	0.0121	0.0145	0.0114	0.0102	0.0112	0.0116	0.0127	0.0121	0.0147	0.0133	0.0088	0.0118	0.0124	0.0107	0.009	0.0113	0.0107	0.0143	0.0139	0.0115	0.01	0.0129	0.0148	0.0124	0.012	0.0122	0.2154	0.3784	0.0125	0.0096	0.0129	0.013	0.0117	0.0133	0.011
cg24812946	0.0904	0.0559	0.0476	0.0509	0.0805	0.0658	0.0447	0.0634	0.0544	0.0482	0.0595	0.0404	0.0884	0.0486	0.0577	0.0678	0.0728	0.0407	0.0513	0.0772	0.0538	0.0592	0.0466	0.0612	0.0342	0.0463	0.0392	0.0448	0.0404	0.0492	0.0784	0.0509	0.0541	0.0899	0.0586	0.0618	0.0583	0.0552	0.0574	0.0584	0.0771	0.0303	0.0694	0.0598	0.0528	0.0566	0.0506	0.0658	0.0728
cg27338480	0.5968	0.5654	0.5431	0.5987	0.4967	0.5938	0.6132	0.6536	0.552	0.5165	0.5733	0.4914	0.5515	0.6904	0.4803	0.5197	0.9687	0.5865	0.5527	0.6384	0.5853	0.7013	0.6576	0.702	0.1142	0.6244	0.5694	0.5661	0.5159	0.7514	0.5639	0.5082	0.6129	0.6946	0.6008	0.5117	0.6974	0.6461	0.5849	0.7093	0.5381	0.5607	0.7151	0.6317	0.5095	0.4962	0.617	0.5041	0.6244
cg02648999	0.0836	0.0737	0.0677	0.0572	0.0714	0.0699	0.1106	0.0689	0.0761	0.079	0.1463	0.0611	0.0708	0.0507	0.0912	0.0679	0.1423	0.0949	0.0601	0.0741	0.0622	0.0753	0.0884	0.0611	0.1019	0.117	0.0642	0.0677	0.0791	0.0586	0.0901	0.0837	0.0901	0.0447	0.0617	0.053	0.0631	0.086	0.07	0.0667	0.1621	0.0628	0.0744	0.0551	0.0768	0.0949	0.1025	0.1675	0.0687
cg12346467	0.0765	0.062	0.0467	0.0619	0.0661	0.0444	0.0485	0.0904	0.0966	0.0462	0.0705	0.0351	0.079	0.0747	0.0576	0.0878	0.042	0.0458	0.0387	0.0699	0.0478	0.1253	0.0458	0.0778	0.0236	0.037	0.05	0.0432	0.0477	0.0545	0.0725	0.0672	0.039	0.1055	0.0786	0.0475	0.0514	0.0805	0.0553	0.0648	0.0542	0.0436	0.0873	0.0496	0.0482	0.0559	0.035	0.086	0.0995
cg20718727	0.02	0.0239	0.0253	0.0164	0.016	0.0152	0.0267	0.0216	0.017	0.0253	0.0135	0.0251	0.0183	0.8539	0.0223	0.0213	0.0176	0.0161	0.0207	0.018	0.0274	0.0193	0.0188	0.0216	0.0196	0.0188	0.0184	0.0171	0.014	0.02	0.0158	0.0232	0.0252	0.0217	0.0141	0.0239	0.0173	0.0194	0.0179	0.0186	0.6912	0.5915	0.0182	0.0147	0.0249	0.0276	0.0235	0.0221	0.0191
cg20718724	0.0185	0.0152	0.0138	0.0113	0.015	0.0123	0.0137	0.0197	0.0162	0.013	0.0131	0.0161	0.0207	0.0598	0.017	0.0145	0.0156	0.0127	0.0187	0.0138	0.0191	0.0168	0.0236	0.0184	0.0843	0.0178	0.0204	0.0136	0.4466	0.0167	0.1412	0.0148	0.0154	0.0171	0.0114	0.0127	0.0212	0.0131	0.0129	0.016	0.027	0.0541	0.02	0.0136	0.0157	0.0239	0.0147	0.0211	0.0163
cg19353425	0.0489	0.0356	0.0534	0.0399	0.0455	0.0564	0.3444	0.1813	0.0375	0.0684	0.3459	0.042	0.1737	0.7149	0.0823	0.067	0.2876	0.0834	0.0561	0.0433	0.0594	0.0543	0.0844	0.0979	0.0347	0.0666	0.0856	0.1019	0.0558	0.0334	0.0493	0.0709	0.1056	0.0372	0.2719	0.0506	0.033	0.0499	0.0648	0.1167	0.7987	0.7296	0.0352	0.0426	0.0801	0.0837	0.1131	0.1518	0.065
cg25476145	0.023	0.0351	0.0333	0.0212	0.1487	0.0767	0.2201	0.0951	0.0402	0.0473	0.2253	0.0512	0.1688	0.0889	0.0474	0.0914	0.3647	0.0557	0.088	0.049	0.0367	0.0317	0.1346	0.2656	0.0335	0.0274	0.0285	0.0403	0.0221	0.0285	0.0713	0.0553	0.0669	0.0262	0.0375	0.0398	0.0206	0.0812	0.0434	0.0547	0.0489	0.4406	0.0625	0.0237	0.092	0.1031	0.0922	0.1327	0.0657
cg10798048	0.03	0.0303	0.0505	0.0312	0.0214	0.0225	0.0637	0.0364	0.0231	0.0698	0.0263	0.0302	0.0244	0.1554	0.048	0.0272	0.0371	0.0251	0.0333	0.0309	0.0413	0.0272	0.0652	0.0271	0.0201	0.0305	0.0347	0.0344	0.0262	0.0331	0.0341	0.0462	0.0425	0.0241	0.0262	0.0442	0.028	0.0346	0.0326	0.0274	0.4749	0.028	0.0523	0.0294	0.0339	0.0554	0.0411	0.0399	0.0241
cg23103367	0.0486	0.0712	0.0558	0.0608	0.0598	0.043	0.0735	0.1211	0.0617	0.0714	0.0829	0.0639	0.0768	0.0873	0.0905	0.0532	0.065	0.0509	0.0846	0.0666	0.0603	0.0726	0.0584	0.069	0.0476	0.0738	0.075	0.0551	0.0539	0.0803	0.0468	0.0617	0.0612	0.1187	0.0725	0.0636	0.0534	0.0593	0.0711	0.062	0.0813	0.0545	0.0969	0.0644	0.06	0.0676	0.0581	0.1079	0.0752
cg05046821	0.0345	0.0206	0.0383	0.0257	0.024	0.02	0.0326	0.0256	0.0291	0.0456	0.022	0.0317	0.0633	0.4883	0.024	0.0474	0.0328	0.0304	0.0285	0.0343	0.034	0.0351	0.0393	0.0315	0.0167	0.0301	0.0264	0.0284	0.0261	0.0422	0.0378	0.0362	0.0306	0.0398	0.0368	0.0377	0.0318	0.0349	0.0244	0.026	0.3877	0.5449	0.0293	0.0192	0.035	0.038	0.0273	0.0279	0.0542
cg12015443	0.7302	0.9111	0.9294	0.8735	0.6234	0.9309	0.8672	0.8245	0.5685	0.9384	0.7486	0.9033	0.26	0.7002	0.6369	0.873	0.8889	0.5902	0.8838	0.1334	0.9308	0.9281	0.919	0.9044	0.8279	0.8931	0.9331	0.8921	0.8276	0.9525	0.8912	0.9382	0.6957	0.9478	0.7489	0.9324	0.8926	0.9424	0.8988	0.9116	0.9277	0.2424	0.9351	0.446	0.8434	0.9201	0.9343	0.8772	0.728
cg25163851	0.2975	0.1486	0.1868	0.1787	0.1131	0.1699	0.2242	0.2945	0.187	0.1385	0.1858	0.2279	0.2535	0.6173	0.0845	0.0813	0.6185	0.0445	0.0722	0.1343	0.1181	0.0673	0.2135	0.311	0.1492	0.153	0.2432	0.2903	0.1406	0.2678	0.3916	0.0983	0.3036	0.0778	0.1381	0.0828	0.1013	0.0955	0.0998	0.2137	0.6755	0.5224	0.2918	0.2925	0.2251	0.445	0.3251	0.3768	0.4275
cg24105933	0.9079	0.8985	0.904	0.8827	0.8633	0.8979	0.8751	0.3854	0.8806	0.907	0.8872	0.8672	0.8654	0.8486	0.8218	0.8641	0.8815	0.8933	0.9105	0.86	0.9013	0.8888	0.8989	0.8952	0.9171	0.885	0.8911	0.8921	0.9185	0.875	0.903	0.9013	0.918	0.8839	0.882	0.912	0.8785	0.889	0.8737	0.8849	0.896	0.8775	0.8891	0.8462	0.9192	0.8933	0.8966	0.7992	0.8572
cg19981751	0.0488	0.0584	0.065	0.0402	0.0438	0.0287	0.0478	0.0605	0.0769	0.0505	0.0476	0.0282	0.0702	0.0628	0.0479	0.0784	0.0361	0.0358	0.0321	0.0514	0.039	0.1028	0.0531	0.0734	0.0347	0.0335	0.0424	0.0358	0.0381	0.0612	0.0803	0.0525	0.0491	0.1004	0.0346	0.0405	0.0662	0.0563	0.044	0.0596	0.0501	0.0492	0.0671	0.0442	0.0506	0.0528	0.0633	0.0677	0.065
cg24295125	0.0153	0.0215	0.0194	0.0149	0.0149	0.031	0.044	0.018	0.0141	0.037	0.192	0.0192	0.0132	0.0127	0.0195	0.0194	0.13	0.0096	0.0344	0.0159	0.0214	0.0133	0.0257	0.017	0.0105	0.0339	0.0351	0.016	0.0115	0.0114	0.0216	0.029	0.0276	0.0135	0.0155	0.0264	0.0146	0.0154	0.0114	0.0116	0.3745	0.3876	0.0141	0.0186	0.0299	0.0349	0.0165	0.0159	0.0119
cg12112929	0.044	0.0367	0.0348	0.03	0.0295	0.0392	0.0324	0.0348	0.0442	0.042	0.0358	0.0344	0.0403	0.0491	0.0323	0.0416	0.0452	0.0269	0.0321	0.0405	0.0325	0.0606	0.0475	0.0434	0.058	0.0329	0.0322	0.0294	0.028	0.066	0.0453	0.0388	0.0371	0.0491	0.0324	0.0294	0.0408	0.052	0.0263	0.0389	0.4653	0.0772	0.0347	0.0275	0.034	0.0408	0.0418	0.0348	0.0468
cg05796845	0.5388	0.8002	0.9115	0.85	0.8256	0.8911	0.8952	0.5945	0.8583	0.9018	0.8089	0.9052	0.6755	0.8837	0.8583	0.8423	0.8946	0.8648	0.9078	0.6729	0.9253	0.7927	0.8747	0.8398	0.7414	0.892	0.8471	0.8586	0.835	0.9034	0.8838	0.9176	0.903	0.8413	0.8568	0.9028	0.8336	0.8695	0.8086	0.85	0.9144	0.8666	0.8554	0.808	0.9066	0.8928	0.9068	0.7224	0.8189
cg20172593	0.0485	0.0562	0.0572	0.0374	0.0558	0.0482	0.0653	0.0722	0.0482	0.0498	0.0476	0.0415	0.0563	0.0622	0.061	0.048	0.0466	0.0537	0.0554	0.0561	0.0585	0.0677	0.0542	0.0441	0.0527	0.0454	0.0503	0.0493	0.0414	0.0557	0.0709	0.0583	0.0516	0.0831	0.0432	0.0811	0.0439	0.062	0.038	0.0532	0.0765	0.0518	0.0629	0.0442	0.0606	0.0592	0.0654	0.0596	0.075
cg05711928	0.0159	0.0223	0.0173	0.0158	0.0183	0.0131	0.0173	0.0207	0.0199	0.02	0.0187	0.0185	0.0184	0.0191	0.0175	0.0309	0.0145	0.0152	0.0232	0.0209	0.0166	0.0218	0.0173	0.021	0.0139	0.0155	0.017	0.0147	0.0134	0.0199	0.0178	0.0175	0.0166	0.0228	0.0163	0.017	0.0198	0.0181	0.0157	0.0189	0.0203	0.0192	0.0287	0.0134	0.017	0.0196	0.0185	0.0209	0.0211
cg25841477	0.1344	0.1895	0.0589	0.0919	0.1365	0.0994	0.0491	0.2107	0.1686	0.0467	0.1366	0.0512	0.1091	0.1132	0.1165	0.1997	0.089	0.1052	0.0492	0.083	0.0621	0.0993	0.0692	0.1221	0.05737	0.05	0.0469	0.0995	0.1057	0.0689	0.101	0.0577	0.0518	0.1256	0.1236	0.0537	0.0799	0.1641	0.1129	0.0897	0.0686	0.1463	0.1266	0.1121	0.0601	0.0658	0.0649	0.2322	0.1083
cg23317907	0.0449	0.0249	0.0215	0.0161	0.0151	0.017	0.0274	0.0332	0.0182	0.0232	0.0146	0.0217	0.0203	0.0184	0.0202	0.0181	0.0158	0.0177	0.0187	0.0193	0.0226	0.0195	0.0228	0.02	0.0717	0.0233	0.0205	0.0155	0.0154	0.0208	0.0214	0.018	0.0187	0.0214	0.018	0.0196	0.0193	0.0207	0.019	0.0204	0.021	0.0191	0.0192	0.0149	0.0167	0.0226	0.0219	0.0254	0.0218
cg27464104	0.0592	0.0795	0.0607	0.0744	0.0696	0.0602	0.0555	0.1659	0.0729	0.0546	0.1398	0.0559	0.0897	0.1044	0.0617	0.0916	0.0551	0.0648	0.0586	0.07	0.0504	0.1042	0.0934	0.131	0.0749	0.0493	0.0535	0.0531	0.0614	0.137	0.2719	0.0634	0.0685	0.1153	0.072	0.0678	0.1153	0.1092	0.0926	0.1389	0.5554	0.1104	0.0987	0.0571	0.0824	0.0711	0.0487	0.0742	0.082
cg02403180	0.061	0.033	0.0328	0.0238	0.022	0.0182	0.0336	0.0415	0.0239	0.0316	0.0202	0.0298	0.0404	0.6067	0.0267	0.0255	0.0282	0.022	0.031	0.0269	0.0357	0.0404	0.0384	0.03	0.0776	0.0301	0.0354	0.0197	0.0382	0.0374	0.0292	0.0348	0.0468	0.03	0.0198	0.0304	0.032	0.0249	0.0223	0.0319	0.6258	0.3081	0.0291	0.0182	0.0254	0.0361	0.0326	0.0339	0.029
cg26714305	0.026	0.0353	0.0452	0.0312	0.049	0.0498	0.0525	0.0512	0.0424	0.3098	0.2754	0.0496	0.0392	0.5184	0.048	0.0347	0.6475	0.0452	0.0272	0.0352	0.047	0.0403	0.0471	0.3197	0.155	0.0678	0.0452	0.0521	0.0313	0.0337	0.0386	0.0911	0.0608	0.0345	0.055	0.047	0.033	0.0452	0.0462	0.0389	0.3303	0.2328	0.0507	0.026	0.043	0.2943	0.0567	0.1185	0.051
cg01462829	0.0891	0.0707	0.1088	0.0191	0.0391	0.0483	0.0601	0.0271	0.0276	0.0448	0.0323	0.031	0.0259	0.496	0.0244	0.4493	0.3658	0.0307	0.0264	0.0224	0.0383	0.0361	0.3528	0.1024	0.0262	0.1836	0.0306	0.0252	0.0374	0.3475	0.0793	0.0416	0.0385	0.0273	0.0982	0.039	0.0343	0.0268	0.0188	0.0277	0.5111	0.1194	0.0241	0.0214	0.0753	0.1017	0.0764	0.0327	0.2851
cg24078602	0.381	0.0347	0.0296	0.0166	0.0228	0.0246	0.0434	0.0437	0.0245	0.035	0.0182	0.0267	0.0287	0.0267	0.0334	0.0208	0.0313	0.0229	0.033	0.0259	0.0214	0.0265	0.03	0.0287	0.0625	0.0279	0.0303	0.0221	0.0292	0.0255	0.0345	0.0318	0.029	0.0395	0.0247	0.0268	0.0287	0.0325	0.3506	0.0338	0.2654	0.0381	0.043	0.0188	0.0196	0.0313	0.0303	0.4284	0.0378
cg12533363	0.0125	0.0304	0.0167	0.0125	0.3604	0.011	0.022	0.4426	0.0104	0.0191	0.0101	0.0165	0.0133	0.0103	0.0189	0.0171	0.5078	0.0121	0.0152	0.0133	0.0184	0.0109	0.0171	0.0115	0.0097	0.0143	0.0145	0.0108	0.01	0.4576	0.0123	0.0182	0.0169	0.0118	0.0099	0.0164	0.0172	0.0091	0.0108	0.0127	0.0185	0.0102	0.0118	0.0109	0.0156	0.0159	0.0127	0.4506	0.0132
cg17317280	0.7245	0.8186	0.92	0.8611	0.8445	0.906	0.9455	0.7102	0.8193	0.9455	0.8957	0.9103	0.8838	0.6939	0.881	0.8386	0.8901	0.8986	0.9208	0.8908	0.9444	0.8515	0.932	0.8585	0.7465	0.9062	0.9161	0.8792	0.8062	0.919	0.8762	0.939	0.9198	0.8577	0.8755	0.9322	0.8442	0.8411	0.8312	0.9191	0.9463	0.8931	0.8683	0.8045	0.9307	0.9004	0.9319	0.8104	0.8187
cg14858469	0.6243	0.0361	0.6654	0.7912	0.0452	0.0381	0.0503	0.0455	0.0399	0.2262	0.0411	0.8372	0.0326	0.1167	0.0383	0.8082	0.0239	0.0366	0.0512	0.0729	0.3194	0.0481	0.8135	0.8917	0.1068	0.4198	0.2911	0.0421	0.051	0.043	0.9304	0.0478	0.0533	0.6873	0.0334	0.0573	0.0433	0.0506	0.0475	0.038	0.0796	0.0339	0.0653	0.0445	0.6815	0.7761	0.1774	0.0361	0.6526
cg08343754	0.0921	0.3565	0.1487	0.1417	0.3241	0.113	0.133	0.0671	0.0933	0.2056	0.1967	0.1425	0.1129	0.206	0.0711	0.1241	0.1942	0.1596	0.0981	0.111	0.1574	0.0921	0.1399	0.3625	0.0746	0.3225	0.1258	0.0801	0.08	0.0971	0.1365	0.1261	0.1486	0.1041	0.082	0.1316	0.0857	0.1916	0.0714	0.1102	0.3945	0.2967	0.1438	0.0809	0.1086	0.2001	0.1114	0.2862	0.1863
cg10036918	0.2825	0.3034	0.4469	0.6142	0.0193	0.0182	0.0277	0.0215	0.0163	0.1358	0.0216	0.4771	0.0218	0.0215	0.0159	0.2368	0.0235	0.0176	0.022	0.0252	0.0245	0.0194	0.4337	0.1532	0.0172	0.0177	0.063	0.0208	0.0171	0.024	0.1842	0.0262	0.0231	0.0248	0.0195	0.0271	0.029	0.1579	0.1587	0.0284	0.0268	0.0264	0.0239	0.073	0.0249	0.3339	0.0212	0.0239	0.0249
cg16536450	0.778	0.6249	0.8125	0.7884	0.478	0.7645	0.6573	0.447	0.7539	0.4553	0.7628	0.5848	0.3901	0.1587	0.314	0.5678	0.8085	0.2974	0.5652	0.3369	0.4564	0.7007	0.5322	0.7078	0.7362	0.7145	0.6616	0.5616	0.8029	0.8068	0.7485	0.5481	0.6531	0.5864	0.6464	0.6479	0.5929	0.7844	0.5273	0.5308	0.394	0.3351	0.7889	0.4384	0.6065	0.6306	0.7076	0.5247	0.3808
cg03143886	0.0124	0.0213	0.0187	0.0129	0.0152	0.0119	0.0435	0.0238	0.011	0.0202	0.0097	0.0133	0.0201	0.2058	0.0155	0.0306	0.2173	0.4938	0.0157	0.0141	0.0161	0.0144	0.0193	0.0346	0.0117	0.0254	0.0183	0.0309	0.0134	0.0145	0.0154	0.0245	0.0361	0.0142	0.0253	0.0193	0.2914	0.0216	0.0182	0.0129	0.6429	0.3435	0.0148	0.0111	0.0217	0.0191	0.0925	0.1486	0.0187
cg01658265	0.34	0.2461	0.366	0.4997	0.0966	0.2176	0.449	0.1359	0.0776	0.2463	0.144	0.32	0.0696	0.0547	0.3752	0.4262	0.4591	0.0594	0.0732	0.0528	0.5204	0.0662	0.6816	0.5858	0.5505	0.3191	0.3059	0.3149	0.214	0.0609	0.7247	0.2389	0.0966	0.0569	0.0545	0.2545	0.3534	0.5659	0.2423	0.0654	0.1005	0.0739	0.6701	0.113	0.0975	0.3509	0.0945	0.1284	0.0793
cg26970841	0.5047	0.5538	0.5497	0.6449	0.6507	0.5964	0.0725	0.6525	0.7572	0.5898	0.2244	0.7255	0.5336	0.0146	0.0374	0.2343	0.8019	0.0126	0.4162	0.1254	0.6641	0.0128	0.6831	0.6803	0.3204	0.4906	0.5883	0.5122	0.2753	0.7158	0.8493	0.5877	0.4321	0.7528	0.0104	0.5703	0.595	0.7721	0.4244	0.7773	0.1366	0.0112	0.5871	0.4688	0.6739	0.7127	0.4092	0.5541	0.0139
cg10830905	0.8871	0.9366	0.9541	0.944	0.945	0.9476	0.9594	0.8909	0.9199	0.9535	0.9541	0.9435	0.9584	0.931	0.9363	0.9449	0.9582	0.9171	0.9479	0.9144	0.9564	0.9322	0.9403	0.9474	0.9191	0.9343	0.9367	0.9381	0.9399	0.9426	0.9455	0.9632	0.9556	0.9406	0.9414	0.9613	0.9407	0.9451	0.9356	0.9541	0.9328	0.9378	0.9361	0.9519	0.9417	0.9473	0.9604	0.9224	0.9196
cg02900441	0.0762	0.0208	0.017	0.0128	0.0153	0.0322	0.0205	0.0276	0.0204	0.023	0.0286	0.0213	0.0175	0.0191	0.0147	0.0209	0.0164	0.0144	0.0231	0.0211	0.0187	0.0321	0.0188	0.1152	0.0263	0.02	0.0207	0.0115	0.0275	0.0228	0.1129	0.0214	0.0237	0.0207	0.017	0.0196	0.0194	0.0211	0.0147	0.0209	0.4059	0.1795	0.036	0.0131	0.0183	0.0266	0.0226	0.0643	0.0204
cg26860182	0.0124	0.0169	0.0936	0.0103	0.0113	0.0683	0.0147	0.0131	0.0119	0.0213	0.0577	0.0134	0.0123	0.8218	0.013	0.0137	0.1201	0.0098	0.0128	0.0122	0.0652	0.012	0.0138	0.1543	0.364	0.0125	0.1481	0.0114	0.009	0.4608	0.2955	0.0251	0.0819	0.0129	0.1545	0.0125	0.0108	0.0139	0.0126	0.0113	0.7115	0.5181	0.0208	0.0093	0.0183	0.021	0.0453	0.1603	0.0123
cg06348038	0.1929	0.1737	0.0866	0.1077	0.0579	0.0439	0.1199	0.3073	0.4416	0.3244	0.2598	0.134	0.0954	0.0558	0.1775	0.1298	0.8864	0.0523	0.1615	0.0803	0.1181	0.1879	0.0555	0.0852	0.0536	0.1391	0.1907	0.0562	0.035	0.428	0.493	0.2769	0.1853	0.1166	0.0448	0.0421	0.3488	0.1874	0.0619	0.0667	0.0989	0.045	0.3574	0.0406	0.1934	0.158	0.2302	0.2579	0.0637
cg22698996	0.0186	0.0322	0.0211	0.0148	0.0148	0.0143	0.0204	0.0208	0.0196	0.0244	0.0212	0.0191	0.0202	0.8909	0.0227	0.0198	0.0283	0.0184	0.0216	0.0189	0.0262	0.0235	0.0296	0.0299	0.0173	0.0214	0.0178	0.0207	0.0199	0.0262	0.0602	0.0271	0.1592	0.0212	0.0908	0.0207	0.0262	0.0183	0.0209	0.0207	0.5694	0.489	0.0239	0.0134	0.023	0.022	0.0231	0.0272	0.0223
cg01073575	0.0428	0.0212	0.0301	0.0186	0.0173	0.0211	0.0218	0.0256	0.019	0.0229	0.0171	0.024	0.0221	0.0213	0.0226	0.0258	0.0167	0.0171	0.0277	0.0157	0.0286	0.0168	0.0259	0.0165	0.017	0.0202	0.0227	0.0182	0.0151	0.0163	0.018	0.024	0.0257	0.0167	0.0183	0.0245	0.0159	0.0173	0.0149	0.0163	0.0239	0.0199	0.017	0.0141	0.0229	0.0273	0.0204	0.0225	0.0144
cg01233487	0.5102	0.7475	0.9033	0.6463	0.634	0.9084	0.6525	0.7371	0.8869	0.8802	0.6974	0.8651	0.8152	0.4908	0.4754	0.766	0.561	0.6519	0.9243	0.5799	0.8972	0.8442	0.8443	0.8494	0.8762	0.7401	0.9213	0.8604	0.7233	0.9031	0.8967	0.778	0.91	0.8795	0.8838	0.8627	0.7908	0.7833	0.5886	0.718	0.6126	0.8177	0.8837	0.5945	0.7959	0.5823	0.8182	0.5985	0.5523
cg07211381	0.1228	0.0829	0.0462	0.0413	0.0584	0.0455	0.0303	0.0751	0.1012	0.036	0.0395	0.0365	0.0508	0.0618	0.0524	0.1101	0.04	0.0374	0.0337	0.0481	0.0419	0.0743	0.0352	0.0613	0.0265	0.0277	0.031	0.04	0.0397	0.0502	0.0757	0.0405	0.0322	0.0711	0.0517	0.0364	0.0587	0.07	0.0503	0.0441	0.0351	0.0447	0.0628	0.0395	0.038	0.0466	0.0401	0.0859	0.0568
cg10779801	0.0341	0.0249	0.0264	0.0176	0.0203	0.0162	0.0255	0.028	0.0159	0.0234	0.0225	0.0193	0.0199	0.0259	0.0198	0.0225	0.015	0.0175	0.0177	0.0201	0.0215	0.0257	0.0253	0.0245	0.0526	0.0165	0.019	0.0145	0.0173	0.0215	0.02	0.0171	0.0191	0.0231	0.017	0.023	0.0238	0.0167	0.0205	0.0189	0.5306	0.0164	0.0217	0.0133	0.0175	0.019	0.0198	0.0263	0.026
cg04131431	0.083	0.1357	0.0554	0.0143	0.1135	0.025	0.3503	0.0272	0.0258	0.028	0.5545	0.0344	0.0584	0.6888	0.4341	0.0385	0.1199	0.0168	0.0315	0.0222	0.0232	0.0184	0.1738	0.4426	0.0656	0.5172	0.0494	0.3003	0.1774	0.1461	0.0293	0.1232	0.1814	0.0286	0.0252	0.0332	0.0343	0.0775	0.0314	0.2516	0.8172	0.6808	0.1157	0.0148	0.13	0.0651	0.4927	0.1168	0.0203
cg23575320	0.0615	0.0266	0.0356	0.0261	0.037	0.0256	0.0374	0.0309	0.0405	0.0533	0.0493	0.0307	0.0709	0.033	0.0268	0.0437	0.0423	0.0344	0.0324	0.0413	0.0371	0.0449	0.0581	0.0363	0.0334	0.0209	0.0324	0.0362	0.0283	0.0301	0.0271	0.0698	0.1937	0.0337	0.0305	0.041	0.0322	0.0305	0.029	0.0423	0.0404	0.0311	0.043	0.0344	0.0628	0.0398	0.0402	0.0344	0.0468
cg16534307	0.3844	0.348	0.3336	0.299	0.8008	0.253	0.66	0.5517	0.1632	0.4091	0.8498	0.3279	0.8582	0.8837	0.4918	0.4551	0.4463	0.6932	0.2993	0.8961	0.614	0.7809	0.6684	0.5452	0.3927	0.4641	0.529	0.6259	0.5271	0.2941	0.2222	0.3787	0.7985	0.2464	0.885	0.4042	0.3698	0.3352	0.4983	0.7631	0.9474	0.8962	0.3383	0.3855	0.3379	0.4524	0.7263	0.7323	0.6142
cg25729716	0.9313	0.887	0.9139	0.8883	0.9131	0.8994	0.8696	0.8791	0.892	0.9091	0.8751	0.9105	0.8992	0.7735	0.8763	0.8642	0.8922	0.8498	0.8679	0.7717	0.9184	0.8826	0.9011	0.8644	0.9024	0.8851	0.8911	0.8925	0.9513	0.8992	0.8938	0.9001	0.9233	0.9174	0.8797	0.8962	0.8787	0.8989	0.905	0.8685	0.8983	0.8909	0.8807	0.8114	0.9126	0.9092	0.9123	0.88	0.8483
cg18880897	0.1317	0.0975	0.0724	0.0695	0.0873	0.0641	0.1014	0.2103	0.1126	0.0714	0.101	0.0456	0.1134	0.0946	0.0922	0.1143	0.2358	0.1063	0.0478	0.0736	0.0687	0.2605	0.0761	0.1793	0.0872	0.0428	0.0528	0.064	0.0906	0.0763	0.0979	0.0653	0.1244	0.1492	0.4144	0.0593	0.1072	0.1101	0.1081	0.0792	0.6432	0.3226	0.1818	0.0885	0.0719	0.0712	0.0596	0.1792	0.1271
cg15777964	0.0392	0.0187	0.0152	0.0107	0.0114	0.0116	0.0186	0.0193	0.0138	0.0184	0.0107	0.0183	0.0181	0.9551	0.0145	0.016	0.0122	0.0129	0.0172	0.016	0.0157	0.0177	0.016	0.0215	0.0398	0.0164	0.0168	0.0113	0.0145	0.0167	0.0239	0.0137	0.0121	0.0169	0.0133	0.0193	0.0156	0.0171	0.0126	0.017	0.2919	0.7847	0.0204	0.0118	0.0129	0.0148	0.0176	0.0184	0.0161
cg08965276	0.3883	0.5712	0.5174	0.0162	0.4757	0.0494	0.5153	0.1823	0.633	0.4979	0.0682	0.5153	0.0971	0.0132	0.4831	0.0212	0.0874	0.0141	0.0228	0.1615	0.3648	0.119	0.0816	0.5143	0.7188	0.0776	0.4534	0.0961	0.4889	0.0758	0.7574	0.2751	0.1014	0.3426	0.0668	0.2525	0.4223	0.4217	0.1467	0.0115	0.0355	0.0469	0.3936	0.0112	0.1037	0.4085	0.5453	0.0373	0.0171
cg27416372	0.3667	0.5099	0.0577	0.4354	0.6147	0.2403	0.0706	0.2248	0.0373	0.2654	0.492	0.0542	0.0818	0.2703	0.0784	0.2507	0.0337	0.0287	0.099	0.4672	0.0731	0.0874	0.4724	0.6117	0.2095	0.0746	0.342	0.2812	0.2301	0.0501	0.6392	0.0873	0.1132	0.0807	0.0192	0.3611	0.4208	0.0496	0.3026	0.4334	0.6601	0.0631	0.5004	0.216	0.0697	0.6889	0.3385	0.1177	0.2203
cg12093775	0.1254	0.3413	0.1406	0.0476	0.3904	0.499	0.7734	0.564	0.5679	0.1238	0.6016	0.1582	0.5879	0.9661	0.1423	0.2015	0.544	0.038	0.1358	0.8442	0.1498	0.1633	0.4419	0.3611	0.0766	0.6359	0.0944	0.2237	0.1851	0.1515	0.5884	0.2399	0.1445	0.1163	0.0736	0.1592	0.3225	0.308	0.1307	0.8009	0.818	0.8248	0.4455	0.1754	0.2381	0.464	0.1035	0.3538	0.6642
cg24566217	0.5608	0.7995	0.8797	0.8351	0.7496	0.8404	0.8778	0.6221	0.8092	0.9121	0.6921	0.8399	0.7153	0.7756	0.6733	0.6873	0.877	0.8827	0.8657	0.6808	0.91	0.8172	0.8332	0.8704	0.7322	0.7699	0.8302	0.837	0.7734	0.7446	0.8288	0.874	0.874	0.8233	0.7521	0.8559	0.698	0.8331	0.7307	0.7629	0.9129	0.7096	0.8629	0.7702	0.8173	0.8723	0.8858	0.6505	0.7268
cg20219381	0.0307	0.2739	0.0857	0.0234	0.0235	0.2942	0.3989	0.0448	0.0296	0.2285	0.0462	0.0267	0.0243	0.9521	0.0269	0.0521	0.0398	0.0215	0.0463	0.0267	0.0436	0.0873	0.4187	0.0272	0.3246	0.1533	0.0435	0.0355	0.037	0.1929	0.9042	0.0564	0.1279	0.3851	0.0315	0.0298	0.3622	0.0419	0.4322	0.2804	0.4538	0.7748	0.2532	0.0238	0.0343	0.6193	0.4011	0.0477	0.1859
cg24782497	0.8191	0.7796	0.7369	0.6328	0.8515	0.6221	0.8292	0.8785	0.7954	0.822	0.7195	0.7598	0.8913	0.9401	0.7848	0.8002	0.866	0.7525	0.6011	0.8415	0.8338	0.3375	0.8223	0.8753	0.9025	0.8272	0.6619	0.7915	0.7188	0.8045	0.908	0.8087	0.7607	0.8598	0.8021	0.721	0.855	0.8276	0.766	0.8255	0.8993	0.8969	0.8695	0.7948	0.7677	0.8627	0.8017	0.8827	0.874
cg12804532	0.0747	0.0625	0.0499	0.0506	0.082	0.0484	0.0807	0.1507	0.0829	0.1512	0.054	0.059	0.3003	0.9054	0.5006	0.1686	0.2447	0.1256	0.0425	0.076	0.049	0.0611	0.1364	0.6102	0.3245	0.0416	0.0462	0.0628	0.0655	0.1942	0.4958	0.1018	0.1446	0.0787	0.2252	0.1195	0.0667	0.0632	0.0765	0.0842	0.8269	0.7992	0.068	0.0656	0.069	0.852	0.0656	0.1967	0.4551
cg05431828	0.0233	0.0247	0.0436	0.0228	0.0226	0.0234	0.0297	0.0243	0.0274	0.039	0.0307	0.0546	0.0281	0.0241	0.0206	0.0243	0.0233	0.0236	0.0381	0.0263	0.0391	0.0312	0.0549	0.0274	0.0357	0.0499	0.0313	0.0225	0.022	0.0229	0.022	0.0444	0.0409	0.0314	0.0301	0.0324	0.0171	0.0275	0.0259	0.0246	0.0403	0.0295	0.0236	0.0368	0.0376	0.0421	0.0331	0.025	0.0326
cg02046218	0.938	0.8973	0.7926	0.4427	0.9487	0.9445	0.8937	0.9158	0.8693	0.8539	0.9484	0.8464	0.9505	0.9028	0.9078	0.7832	0.8598	0.9404	0.5371	0.9037	0.9592	0.9553	0.6968	0.9445	0.8728	0.7854	0.8115	0.9387	0.9313	0.9497	0.9513	0.9475	0.9235	0.9162	0.958	0.9607	0.9429	0.9541	0.9365	0.9229	0.9263	0.9185	0.9515	0.6524	0.7589	0.938	0.9492	0.9276	0.8527
cg22195627	0.023	0.0643	0.0344	0.0197	0.0127	0.0121	0.0144	0.0179	0.0166	0.5626	0.0389	0.0143	0.0126	0.686	0.0135	0.0333	0.2538	0.0115	0.0833	0.0119	0.0836	0.7783	0.0155	0.2411	0.0291	0.2685	0.027	0.0534	0.0314	0.0142	0.0121	0.0165	0.0226	0.618	0.0108	0.0906	0.0139	0.0197	0.0167	0.0147	0.3868	0.5125	0.016	0.0111	0.0121	0.5083	0.0185	0.0209	0.0173
cg14776114	0.0136	0.0174	0.0139	0.0132	0.0113	0.0106	0.0152	0.0166	0.0156	0.0141	0.0111	0.014	0.0163	0.0194	0.0141	0.02	0.0128	0.0101	0.0182	0.0178	0.0158	0.0209	0.0201	0.0188	0.0104	0.0128	0.015	0.0141	0.0119	0.0191	0.0269	0.0148	0.0155	0.022	0.0103	0.0175	0.0183	0.023	0.0159	0.0171	0.0168	0.01	0.0227	0.0115	0.0126	0.0173	0.016	0.0178	0.026
cg00847309	0.8549	0.9118	0.9179	0.8937	0.9341	0.8932	0.9194	0.8803	0.902	0.895	0.9263	0.874	0.9275	0.9683	0.9265	0.9002	0.9244	0.8899	0.9201	0.8991	0.9158	0.9175	0.9288	0.9004	0.9419	0.8873	0.9044	0.9333	0.824	0.9236	0.9418	0.9299	0.937	0.9459	0.898	0.9192	0.9343	0.9364	0.8959	0.9283	0.9384	0.9093	0.941	0.9194	0.9327	0.9054	0.9407	0.9105	0.9315
cg07271261	0.2176	0.2924	0.3872	0.3588	0.1613	0.1748	0.202	0.0976	0.1922	0.4635	0.504	0.1457	0.1592	0.7829	0.1144	0.4223	0.5545	0.0984	0.2673	0.197	0.2351	0.3982	0.2491	0.2524	0.1157	0.2525	0.2735	0.381	0.5846	0.2957	0.1479	0.2454	0.2741	0.1892	0.4464	0.3176	0.5534	0.1851	0.3683	0.1337	0.7269	0.6784	0.1569	0.3489	0.1777	0.1387	0.2746	0.3638	0.4732
cg07145284	0.0842	0.1232	0.1399	0.0544	0.0597	0.1132	0.2123	0.0889	0.106	0.2006	0.1791	0.0775	0.0813	0.7993	0.0771	0.0931	0.1606	0.0422	0.1131	0.0787	0.0821	0.2181	0.1042	0.1215	0.0972	0.0822	0.1311	0.1462	0.0603	0.1302	0.1041	0.2025	0.2735	0.0528	0.4704	0.1617	0.0636	0.08	0.1565	0.0623	0.4922	0.5979	0.1124	0.059	0.1204	0.0954	0.2045	0.1436	0.064
cg19071342	0.0572	0.0583	0.0583	0.0424	0.0608	0.0449	0.065	0.0522	0.0503	0.0566	0.0491	0.0419	0.0512	0.0445	0.0518	0.075	0.0436	0.051	0.0502	0.0412	0.0528	0.0467	0.0549	0.0444	0.0516	0.0423	0.0476	0.0619	0.0294	0.0428	0.0541	0.058	0.0655	0.0497	0.0496	0.0649	0.0477	0.0482	0.0477	0.0641	0.0711	0.0523	0.0517	0.0411	0.0501	0.0559	0.0519	0.0532	0.048
cg14819088	0.6283	0.7496	0.8276	0.8724	0.3686	0.9315	0.5704	0.529	0.7294	0.661	0.4273	0.8288	0.3482	0.1433	0.4711	0.6384	0.9025	0.3673	0.703	0.1963	0.8913	0.8805	0.7018	0.6784	0.6556	0.3846	0.8987	0.4695	0.8775	0.872	0.9057	0.7141	0.7698	0.7169	0.6784	0.8199	0.9301	0.7431	0.7693	0.4941	0.5864	0.7083	0.8967	0.5298	0.7764	0.839	0.8416	0.7097	0.5882
cg24740195	0.0641	0.0264	0.0173	0.0233	0.0218	0.0232	0.0219	0.0307	0.0285	0.0192	0.0196	0.0234	0.0284	0.0243	0.0205	0.0228	0.4044	0.0163	0.02	0.0279	0.0175	0.0301	0.02	0.0315	0.0612	0.027	0.0228	0.0164	0.0194	0.0253	0.027	0.0216	0.0204	0.0304	0.0158	0.0183	0.0297	0.0288	0.0203	0.029	0.026	0.0278	0.0306	0.0203	0.0236	0.0215	0.0172	0.4953	0.0328
cg13299707	0.8575	0.8126	0.8882	0.8745	0.8722	0.9017	0.8665	0.6974	0.8685	0.889	0.3751	0.8283	0.7163	0.4336	0.7968	0.8136	0.8705	0.8272	0.7663	0.6149	0.9002	0.7006	0.8762	0.8173	0.8708	0.8084	0.8147	0.6822	0.8443	0.8478	0.8572	0.897	0.8603	0.866	0.8478	0.8918	0.8278	0.8732	0.8336	0.7991	0.7601	0.7952	0.8991	0.8379	0.8342	0.8836	0.8936	0.6989	0.8297
cg16737773	0.0187	0.0158	0.0162	0.0145	0.0132	0.0148	0.0189	0.0184	0.0196	0.0163	0.018	0.0169	0.0206	0.0287	0.0166	0.0278	0.0149	0.0129	0.0167	0.0192	0.0155	0.0185	0.017	0.0183	0.0141	0.0159	0.0188	0.0151	0.0131	0.0192	0.0249	0.0205	0.017	0.0216	0.014	0.0208	0.0182	0.0181	0.0144	0.0186	0.0189	0.0151	0.0216	0.0166	0.0186	0.0203	0.0179	0.0192	0.0281
cg06752594	0.0426	0.0589	0.0369	0.0299	0.0368	0.0239	0.0378	0.0604	0.0163	0.0495	0.0417	0.0372	0.0534	0.037	0.0521	0.0536	0.0291	0.0501	0.0427	0.0391	0.0275	0.0425	0.0273	0.0366	0.0405	0.0473	0.0297	0.0323	0.0233	0.0355	0.0372	0.0535	0.0662	0.0518	0.044	0.029	0.0474	0.0343	0.0349	0.034	0.0281	0.0385	0.0344	0.0272	0.036	0.0525	0.0297	0.0555	0.0491
cg13703871	0.5145	0.7095	0.7937	0.8425	0.51	0.8134	0.2361	0.8812	0.5942	0.4125	0.79	0.7769	0.0294	0.0256	0.6447	0.488	0.0341	0.0305	0.3214	0.0347	0.5639	0.5404	0.8537	0.5986	0.3323	0.6543	0.7465	0.3022	0.1659	0.825	0.6254	0.3891	0.0323	0.4527	0.2592	0.0341	0.6851	0.9287	0.3293	0.5299	0.3362	0.0436	0.7956	0.0833	0.0996	0.8773	0.3881	0.4511	0.8834
cg08065231	0.4631	0.5693	0.7445	0.8219	0.4089	0.7543	0.2544	0.8218	0.9202	0.6602	0.7558	0.6579	0.0265	0.0261	0.8643	0.4054	0.0245	0.025	0.2939	0.0331	0.7503	0.0951	0.7479	0.4993	0.6886	0.6618	0.5899	0.4676	0.1057	0.7089	0.5783	0.207	0.0376	0.3086	0.2197	0.0318	0.5543	0.8833	0.4754	0.6358	0.0962	0.029	0.8562	0.191	0.0522	0.8682	0.3362	0.3862	0.8644
cg04469873	0.0512	0.0421	0.0414	0.023	0.0351	0.0319	0.0348	0.0356	0.0317	0.0321	0.0377	0.0337	0.0334	0.0448	0.0361	0.0541	0.0438	0.0397	0.0362	0.0389	0.0402	0.051	0.0455	0.0482	0.0488	0.0331	0.0343	0.0334	0.0323	0.0382	0.045	0.0412	0.046	0.0459	0.033	0.044	0.0393	0.0439	0.0421	0.0368	0.0429	0.0448	0.0394	0.0304	0.0462	0.0425	0.0432	0.0454	0.0421
cg22547404	0.0139	0.0211	0.0155	0.0145	0.0124	0.0119	0.0153	0.0269	0.0137	0.0187	0.0131	0.0163	0.0157	0.0138	0.0196	0.0162	0.0143	0.0144	0.0157	0.0156	0.0176	0.0168	0.0199	0.0174	0.0133	0.0147	0.0183	0.0134	0.0108	0.0123	0.0144	0.0181	0.0228	0.0203	0.0158	0.0159	0.0177	0.0151	0.0128	0.0168	0.017	0.0158	0.0159	0.0124	0.0156	0.0165	0.0179	0.0262	0.0145
cg24360651	0.0244	0.081	0.0438	0.0288	0.0446	0.0434	0.0318	0.0649	0.0522	0.0377	0.0378	0.039	0.0569	0.8133	0.0492	0.041	0.0613	0.0535	0.0625	0.0437	0.0391	0.0315	0.0541	0.0908	0.0395	0.0363	0.0394	0.0377	0.0396	0.0221	0.0383	0.0673	0.1619	0.0369	0.123	0.0406	0.0777	0.0712	0.0452	0.0472	0.4492	0.4054	0.0673	0.0256	0.0557	0.0741	0.0651	0.0654	0.0343
cg18708075	0.0522	0.0999	0.0686	0.0848	0.1093	0.0494	0.0717	0.0839	0.1481	0.0498	0.087	0.0468	0.0836	0.1743	0.1078	0.1678	0.0857	0.0956	0.0502	0.0917	0.0516	0.0772	0.0711	0.0794	0.1988	0.0576	0.0511	0.0935	0.1468	0.0993	0.1831	0.0646	0.0598	0.12	0.1076	0.0675	0.1045	0.1029	0.0866	0.0648	0.0817	0.0656	0.0911	0.159	0.0665	0.0639	0.0797	0.1498	0.1801
cg02259775	0.0203	0.0182	0.0216	0.018	0.016	0.0159	0.0202	0.0165	0.0163	0.0184	0.0158	0.0187	0.014	0.0164	0.0174	0.0211	0.0187	0.0152	0.0152	0.0153	0.0204	0.0204	0.0183	0.0144	0.017	0.0156	0.0155	0.0148	0.0134	0.0179	0.0172	0.0165	0.0206	0.0158	0.0155	0.0193	0.0158	0.0174	0.0189	0.0169	0.0215	0.0174	0.0159	0.0155	0.0187	0.0223	0.0189	0.0193	0.0176
cg01498900	0.0652	0.0742	0.0779	0.034	0.0535	0.0447	0.1007	0.0472	0.059	0.0641	0.0907	0.0591	0.1733	0.0819	0.0598	0.0573	0.3703	0.1025	0.0933	0.0463	0.0602	0.1001	0.093	0.1566	0.0311	0.0844	0.0379	0.0503	0.0999	0.0432	0.0416	0.055	0.0768	0.0346	0.0348	0.0603	0.0688	0.0583	0.0345	0.0335	0.4952	0.2884	0.1196	0.0629	0.0652	0.1255	0.0648	0.0906	0.1176
cg12604794	0.0562	0.0329	0.1014	0.0353	0.0344	0.0515	0.0668	0.049	0.0384	0.0913	0.199	0.0303	0.0392	0.2542	0.0306	0.0407	0.2479	0.0532	0.0539	0.0673	0.0548	0.0302	0.0626	0.0987	0.0189	0.045	0.0602	0.0809	0.0352	0.0252	0.0322	0.0692	0.1304	0.0319	0.1403	0.0453	0.0319	0.0402	0.0284	0.0698	0.2448	0.1042	0.0322	0.0307	0.0765	0.0628	0.1041	0.1431	0.077
cg25987171	0.906	0.9205	0.9554	0.9398	0.9251	0.9497	0.9315	0.8558	0.9428	0.9498	0.9437	0.9172	0.9507	0.8937	0.926	0.9363	0.894	0.9252	0.9419	0.9138	0.9445	0.9437	0.9295	0.9468	0.9069	0.9251	0.9256	0.9332	0.9542	0.9408	0.9304	0.9391	0.9661	0.9558	0.947	0.9534	0.9485	0.9481	0.9225	0.9433	0.9443	0.9132	0.943	0.9252	0.9509	0.9398	0.9435	0.9204	0.8999
cg03043228	0.0626	0.0522	0.07	0.0442	0.0845	0.0997	0.0674	0.049	0.0633	0.0828	0.0766	0.0494	0.0503	0.0443	0.0509	0.0442	0.0865	0.0509	0.0542	0.0641	0.0637	0.0404	0.0445	0.0487	0.0405	0.0934	0.0574	0.0541	0.0369	0.0827	0.0426	0.0467	0.0815	0.0312	0.0598	0.078	0.0411	0.0397	0.0623	0.0689	0.0648	0.0807	0.0405	0.0469	0.0831	0.0953	0.0961	0.076	0.0641
cg02672854	0.41	0.2401	0.2009	0.0505	0.0805	0.1395	0.3239	0.0549	0.111	0.055	0.3918	0.0441	0.2181	0.5493	0.1022	0.0897	0.8159	0.8306	0.0458	0.0986	0.0549	0.0913	0.1142	0.0976	0.1254	0.4248	0.0342	0.4772	0.0444	0.4754	0.0664	0.0799	0.0623	0.0979	0.2992	0.0566	0.1971	0.1724	0.1845	0.4809	0.4561	0.6265	0.1834	0.0643	0.0499	0.0723	0.3936	0.2452	0.7645
cg13544851	0.0627	0.0602	0.0826	0.0341	0.0503	0.0296	0.0789	0.0459	0.0547	0.0896	0.0434	0.0535	0.0493	0.8026	0.0595	0.0648	0.0415	0.469	0.085	0.0565	0.0876	0.1126	0.0663	0.0545	0.0251	0.081	0.0739	0.0611	0.06	0.0485	0.0483	0.0892	0.0863	0.0487	0.4631	0.0941	0.0599	0.0649	0.0904	0.0483	0.6467	0.4023	0.0452	0.0363	0.0744	0.0702	0.0821	0.0685	0.052
cg16638571	0.0139	0.0153	0.0165	0.0098	0.0102	0.0102	0.0178	0.0168	0.0114	0.0157	0.011	0.0134	0.0104	0.0123	0.0124	0.0136	0.0108	0.1554	0.0138	0.0113	0.0144	0.0167	0.0153	0.0122	0.0106	0.0125	0.0143	0.0104	0.0095	0.011	0.0119	0.0148	0.0156	0.0122	0.0103	0.0129	0.0117	0.0129	0.0103	0.012	0.5821	0.5352	0.0122	0.0115	0.015	0.0181	0.0138	0.0158	0.0106
cg02713138	0.0797	0.0731	0.0578	0.0582	0.0513	0.0454	0.0942	0.0864	0.0526	0.0761	0.0735	0.0522	0.0877	0.0877	0.0643	0.1218	0.0575	0.0478	0.0587	0.0949	0.0584	0.104	0.0703	0.1042	0.0443	0.0489	0.0501	0.0551	0.0533	0.0774	0.1278	0.1042	0.1632	0.1097	0.0707	0.0752	0.0777	0.1009	0.0598	0.0751	0.0668	0.0522	0.1026	0.0415	0.0718	0.0675	0.0652	0.0781	0.1218
cg00434119	0.8276	0.8636	0.8543	0.8446	0.9292	0.8886	0.9351	0.8993	0.891	0.8325	0.8835	0.9129	0.917	0.9118	0.9164	0.6488	0.9269	0.9045	0.4659	0.9423	0.911	0.4878	0.9208	0.9119	0.8042	0.6221	0.714	0.874	0.7353	0.8629	0.9011	0.7913	0.8576	0.903	0.9306	0.8052	0.8066	0.9382	0.6245	0.9186	0.9476	0.8921	0.9343	0.9406	0.6638	0.9248	0.8168	0.9173	0.6169
cg08415986	0.0187	0.0295	0.0177	0.017	0.0153	0.0106	0.0146	0.051	0.0126	0.0161	0.0109	0.0146	0.013	0.0197	0.0163	0.0146	0.011	0.0131	0.0167	0.0122	0.0129	0.0127	0.0789	0.0123	0.0336	0.019	0.0157	0.0326	0.0172	0.0161	0.0474	0.0155	0.0189	0.0502	0.0112	0.0553	0.0157	0.0141	0.1817	0.013	0.0187	0.0143	0.0133	0.0576	0.0129	0.0153	0.0122	0.0266	0.0173
cg26425669	0.5044	0.0303	0.0291	0.0369	0.0236	0.0239	0.1153	0.0355	0.0387	0.0241	0.0178	0.0234	0.2888	0.9603	0.0238	0.0267	0.0257	0.6085	0.0274	0.0312	0.028	0.028	0.0222	0.0603	0.1036	0.046	0.0251	0.0237	0.0261	0.0379	0.0294	0.0212	0.0262	0.0368	0.2423	0.0322	0.0327	0.0298	0.0382	0.0366	0.1572	0.8454	0.0347	0.0229	0.0389	0.0404	0.1388	0.0346	0.0386
cg04802221	0.8868	0.7929	0.8971	0.8634	0.8527	0.8758	0.7753	0.5769	0.9292	0.8325	0.8563	0.8398	0.771	0.5536	0.7631	0.7138	0.7049	0.5666	0.8945	0.7543	0.8962	0.9116	0.7922	0.7711	0.9238	0.7411	0.8568	0.7396	0.8895	0.9325	0.9029	0.8801	0.8511	0.9087	0.8172	0.8197	0.9321	0.9164	0.8246	0.8553	0.8749	0.8456	0.9123	0.6467	0.7209	0.8159	0.7659	0.687	0.4798
cg07046885	0.0314	0.0229	0.0322	0.0204	0.0231	0.0314	0.0247	0.022	0.0245	0.0308	0.0202	0.0281	0.0357	0.0263	0.03	0.0288	0.0286	0.0232	0.029	0.0246	0.0372	0.0324	0.0309	0.0335	0.0228	0.0281	0.0267	0.025	0.0306	0.0293	0.022	0.0309	0.0295	0.0282	0.0251	0.0324	0.022	0.0257	0.0171	0.0264	0.0302	0.0218	0.0276	0.02	0.028	0.0257	0.0236	0.0242	0.0442
cg22706420	0.0284	0.0349	0.0374	0.021	0.0241	0.0234	0.0444	0.0429	0.0229	0.0365	0.0217	0.0282	0.0299	0.5984	0.0486	0.0294	0.0235	0.0239	0.0483	0.0287	0.0454	0.0254	0.0542	0.0319	0.03385	0.0257	0.0268	0.0163	0.0246	0.035	0.032	0.0472	0.038	0.0313	0.0155	0.0269	0.0263	0.0176	0.0201	0.0377	0.6881	0.4733	0.0266	0.0243	0.0359	0.0313	0.0351	0.044	0.0326
cg00237904	0.4641	0.5549	0.5075	0.3671	0.7949	0.423	0.4541	0.3754	0.4022	0.4777	0.4721	0.4247	0.6742	0.9227	0.4193	0.574	0.8846	0.8663	0.4269	0.4652	0.4501	0.1709	0.5863	0.38	0.7369	0.4167	0.4286	0.5167	0.4531	0.5139	0.4094	0.4314	0.6903	0.4408	0.5548	0.48	0.4519	0.7686	0.2526	0.613	0.8672	0.8233	0.8148	0.4151	0.4642	0.5104	0.47	0.4425	0.4272
cg09916030	0.4166	0.7906	0.79	0.3936	0.268	0.4956	0.423	0.1689	0.7042	0.5509	0.4137	0.3952	0.2289	0.146	0.224	0.4526	0.4862	0.1131	0.5728	0.1943	0.7832	0.8706	0.2808	0.621	0.3976	0.4402	0.6084	0.3546	0.7343	0.7768	0.849	0.5823	0.4934	0.5325	0.5438	0.7562	0.6217	0.4846	0.6087	0.2474	0.292	0.2306	0.5548	0.1964	0.4676	0.3741	0.595	0.2918	0.2416
cg20603260	0.0305	0.0325	0.0259	0.0184	0.023	0.0166	0.0286	0.0397	0.0207	0.0278	0.026	0.0218	0.0479	0.2049	0.0275	0.0248	0.0224	0.0165	0.0189	0.0239	0.0263	0.0273	0.0287	0.0275	0.064	0.028	0.0264	0.0224	0.0229	0.0234	0.0225	0.0248	0.0285	0.0257	0.0193	0.0193	0.0292	0.0219	0.0206	0.0215	0.7822	0.4518	0.0256	0.0174	0.0195	0.0235	0.0257	0.0406	0.028
cg07355841	0.0414	0.0289	0.0227	0.0152	0.0203	0.0178	0.0246	0.0304	0.0181	0.0238	0.0178	0.0215	0.0203	0.9836	0.0238	0.0233	0.0204	0.0175	0.0286	0.0168	0.0235	0.0329	0.0281	0.0252	0.1576	0.0229	0.0269	0.0192	0.0294	0.0312	0.6897	0.0241	0.0218	0.0188	0.0228	0.021	0.0225	0.0253	0.0413	0.8945	0.8738	0.9036	0.0205	0.0158	0.0188	0.8582	0.0881	0.0216	0.0197
cg08038957	0.015	0.0195	0.0103	0.011	0.0111	0.009	0.017	0.0216	0.0114	0.0174	0.0134	0.0135	0.0156	0.013	0.0161	0.0166	0.0121	0.011	0.0137	0.0123	0.0126	0.0152	0.0136	0.0137	0.01315	0.017	0.0144	0.0096	0.066	0.017	0.0165	0.0112	0.0126	0.012	0.011	0.0133	0.0144	0.0115	0.0107	0.0137	0.0137	0.0099	0.0124	0.0109	0.0107	0.0121	0.0143	0.0203	0.0199
cg06774441	0.0638	0.0491	0.0572	0.0458	0.0474	0.0463	0.0463	0.0681	0.0452	0.0499	0.0593	0.0382	0.0442	0.0569	0.0552	0.0568	0.0648	0.0561	0.0411	0.0681	0.0492	0.0661	0.0526	0.0524	0.0816	0.0459	0.0467	0.0465	0.0674	0.0384	0.0568	0.058	0.0601	0.0462	0.0515	0.0496	0.0448	0.0515	0.0508	0.0476	0.0591	0.0578	0.0529	0.0523	0.0511	0.0541	0.0549	0.0586	0.0516
cg23411654	0.0389	0.0494	0.0443	0.0688	0.0453	0.0343	0.0669	0.0746	0.0329	0.0545	0.2896	0.0294	0.0381	0.4609	0.0272	0.0332	0.326	0.0858	0.023	0.0379	0.04	0.0506	0.0268	0.0384	0.0198	0.0302	0.0218	0.0275	0.0592	0.0377	0.0398	0.0767	0.0364	0.0826	0.2736	0.0297	0.0649	0.0187	0.0646	0.0809	0.4726	0.4637	0.0606	0.0377	0.0369	0.1734	0.05	0.0383	0.1138
cg09957391	0.0374	0.0462	0.0512	0.0281	0.0413	0.0378	0.0512	0.0437	0.0788	0.0569	0.0577	0.0359	0.036	0.5111	0.034	0.0443	0.0324	0.0558	0.0538	0.0417	0.0379	0.057	0.0512	0.0498	0.0342	0.0559	0.0432	0.0503	0.0226	0.0315	0.0284	0.0299	0.0548	0.0376	0.0381	0.0538	0.0372	0.037	0.0362	0.0506	0.3994	0.1155	0.041	0.0311	0.0352	0.0563	0.0458	0.0406	0.032
cg02075570	0.0363	0.0327	0.038	0.0332	0.0416	0.0347	0.0376	0.3346	0.0228	0.0753	0.0292	0.0298	0.0291	0.8164	0.0419	0.0314	0.0721	0.58	0.0295	0.0259	0.031	0.0342	0.1002	0.0488	0.0355	0.0308	0.0307	0.0498	0.0811	0.0405	0.0474	0.0699	0.1068	0.0429	0.026	0.0462	0.0305	0.029	0.0418	0.0446	0.8919	0.763	0.0728	0.0347	0.0396	0.0324	0.0716	0.0887	0.0281
cg05265849	0.6353	0.6699	0.7818	0.4162	0.7253	0.7137	0.4724	0.1929	0.6802	0.7213	0.6241	0.7164	0.4024	0.2715	0.6438	0.5951	0.8627	0.3857	0.3709	0.2909	0.6741	0.6599	0.7173	0.6874	0.6945	0.5142	0.5567	0.4548	0.6143	0.5792	0.7979	0.6885	0.5514	0.7406	0.5604	0.5753	0.6947	0.8342	0.2571	0.6989	0.5791	0.2454	0.8561	0.3052	0.5176	0.8152	0.7228	0.6621	0.3763
cg00964221	0.1751	0.1649	0.0484	0.0367	0.3384	0.3111	0.0602	0.0425	0.0878	0.0794	0.2693	0.1069	0.0548	0.465	0.0389	0.0473	0.1682	0.0905	0.0961	0.0444	0.0882	0.1361	0.1489	0.2505	0.04	0.0281	0.0332	0.0312	0.0789	0.0542	0.0376	0.0827	0.1762	0.0468	0.0737	0.0467	0.0374	0.0455	0.0375	0.0338	0.4748	0.1701	0.1032	0.0355	0.0577	0.3444	0.0515	0.4183	0.0311
cg09032010	0.0299	0.0354	0.0375	0.1019	0.0202	0.1689	0.025	0.0528	0.024	0.3063	0.0236	0.02	0.0226	0.0196	0.0271	0.0201	0.0333	0.0189	0.0257	0.0426	0.0317	0.0194	0.0343	0.2244	0.05	0.0305	0.0321	0.2242	0.1087	0.0238	0.0324	0.0394	0.0215	0.0263	0.016	0.0448	0.1525	0.0623	0.0216	0.0245	0.5628	0.4201	0.295	0.0163	0.0212	0.1053	0.0393	0.2603	0.0278
cg26695445	0.0541	0.0473	0.0706	0.05	0.0512	0.0398	0.0713	0.3873	0.0748	0.0449	0.0571	0.0414	0.1408	0.042	0.0506	0.0572	0.032	0.0343	0.0435	0.0409	0.0647	0.0336	0.0614	0.0505	0.0462	0.0475	0.047	0.5329	0.0444	0.0329	0.0364	0.0872	0.056	0.0483	0.0433	0.0486	0.0331	0.0378	0.0493	0.0485	0.0648	0.0369	0.0571	0.0371	0.0595	0.0685	0.062	0.2007	0.0414
cg04749104	0.0432	0.0521	0.0303	0.0256	0.0284	0.0405	0.0431	0.0343	0.0325	0.0672	0.0333	0.0293	0.071	0.0458	0.0497	0.0326	0.0297	0.0587	0.0246	0.0533	0.0326	0.0496	0.0606	0.0513	0.0293	0.045	0.0331	0.0484	0.0209	0.0317	0.034	0.1075	0.1413	0.0307	0.0833	0.0391	0.0223	0.0396	0.0553	0.0411	0.6176	0.4956	0.0592	0.0233	0.0698	0.0492	0.0452	0.114	0.0545
cg22403382	0.9766	0.976	0.9815	0.9824	0.9798	0.9704	0.9773	0.9711	0.97443	0.9775	0.9772	0.9773	0.9817	0.9424	0.9776	0.968	0.9775	0.9757	0.9767	0.975	0.9836	0.9795	0.9807	0.9775	0.968	0.9804	0.9767	0.9744	0.9727	0.9804	0.9742	0.9798	0.9794	0.9728	0.9835	0.971	0.9816	0.9787	0.9757	0.979	0.9713	0.9773	0.9748	0.9733	0.9816	0.9707	0.9692	0.9707	0.9821
cg01382414	0.3144	0.1461	0.2024	0.1196	0.1816	0.1598	0.3763	0.0872	0.1276	0.3993	0.4448	0.2686	0.1774	0.6304	0.0864	0.2318	0.2626	0.3293	0.108	0.1005	0.1363	0.1098	0.1894	0.1734	0.2654	0.0989	0.1663	0.1255	0.1211	0.1958	0.2019	0.185	0.232	0.0933	0.2879	0.1315	0.102	0.1352	0.1918	0.2422	0.634	0.589	0.2156	0.0608	0.3298	0.3047	0.2944	0.2815	0.1531
cg24605090	0.3764	0.5154	0.4383	0.3734	0.4208	0.4315	0.4099	0.3968	0.4136	0.6288	0.5916	0.4046	0.628	0.8039	0.434	0.2688	0.7715	0.7326	0.4065	0.4932	0.4409	0.343	0.5523	0.7282	0.5702	0.41	0.431	0.4186	0.3878	0.5659	0.4571	0.4309	0.5892	0.4996	0.5035	0.4513	0.437	0.5554	0.3339	0.5475	0.4637	0.6596	0.7399	0.3597	0.413	0.4518	0.4697	0.467	0.5612
cg16189024	0.0218	0.0309	0.0224	0.0175	0.0142	0.0151	0.0206	0.0351	0.0159	0.0287	0.0166	0.0227	0.02	0.9786	0.0287	0.0228	0.0119	0.0161	0.0201	0.0206	0.023	0.0224	0.0231	0.0188	0.0243	0.0205	0.0205	0.0142	0.0319	0.0182	0.0272	0.0268	0.0309	0.0203	0.0149	0.0197	0.0182	0.019	0.0164	0.0193	0.797	0.6092	0.0198	0.0115	0.0165	0.0233	0.0305	0.0293	0.0239
cg03310242	0.3687	0.0551	0.0443	0.0318	0.1036	0.0724	0.0594	0.1102	0.0353	0.0796	0.3308	0.0428	0.1737	0.9628	0.8662	0.0397	0.0824	0.0379	0.0762	0.0448	0.0804	0.064	0.3175	0.1086	0.4075	0.0836	0.3741	0.0591	0.0668	0.055	0.1026	0.0907	0.0927	0.1432	0.0351	0.0486	0.0385	0.0421	0.0539	0.4384	0.8046	0.8407	0.1138	0.0329	0.5367	0.2967	0.1639	0.6405	0.1406
cg18268988	0.1127	0.0941	0.1105	0.048	0.1	0.0692	0.2017	0.0954	0.1185	0.2602	0.1202	0.0828	0.1063	0.0656	0.0692	0.1073	0.4842	0.0489	0.1029	0.0629	0.1278	0.1103	0.1134	0.0935	0.0812	0.0785	0.0937	0.0906	0.0913	0.0787	0.069	0.1027	0.1621	0.0628	0.0577	0.1015	0.1099	0.085	0.0779	0.0613	0.2314	0.0555	0.1094	0.0522	0.0741	0.0993	0.0846	0.0868	0.0658
cg01727899	0.328	0.8594	0.9423	0.9294	0.8963	0.9311	0.939	0.6631	0.9081	0.937	0.933	0.9087	0.9113	0.4563	0.8866	0.708	0.9442	0.7166	0.906	0.6482	0.9427	0.9144	0.7224	0.9351	0.8699	0.8677	0.9051	0.9289	0.9235	0.9335	0.9369	0.9364	0.9306	0.9266	0.9055	0.928	0.9023	0.9367	0.8626	0.8942	0.9483	0.8755	0.9332	0.8978	0.8387	0.93	0.9121	0.8677	0.8683
cg06320126	0.3899	0.0528	0.0527	0.0354	0.0422	0.0371	0.0748	0.0418	0.0552	0.0552	0.0389	0.0654	0.0865	0.8917	0.0484	0.0426	0.273	0.0527	0.0396	0.0557	0.0455	0.1022	0.0718	0.1109	0.0987	0.0674	0.0577	0.0526	0.069	0.0626	0.0827	0.0388	0.0592	0.0752	0.0614	0.0604	0.0407	0.0594	0.0397	0.067	0.651	0.785	0.0628	0.0331	0.0436	0.0527	0.0645	0.0564	0.0786
cg09157727	0.5132	0.0629	0.446	0.6968	0.0511	0.0339	0.0357	0.0965	0.0374	0.3641	0.0239	0.7139	0.0781	0.0835	0.0508	0.4078	0.0372	0.0368	0.0484	0.0521	0.6371	0.0724	0.7674	0.6903	0.1445	0.3801	0.4951	0.0377	0.029	0.0673	0.303	0.0252	0.0476	0.3352	0.021	0.0305	0.0742	0.0742	0.0399	0.071	0.0356	0.0275	0.1013	0.0496	0.5302	0.7243	0.0615	0.0669	0.7664
cg03472898	0.184	0.2566	0.1389	0.1524	0.0908	0.1311	0.0815	0.3754	0.3064	0.0888	0.1033	0.257	0.241	0.7791	0.1591	0.5315	0.8135	0.4882	0.1135	0.1592	0.0763	0.467	0.4922	0.1037	0.0772	0.1403	0.1115	0.2885	0.2762	0.0971	0.0819	0.188	0.1677	0.125	0.0862	0.146	0.1106	0.103	0.1203	0.078	0.8621	0.4769	0.0872	0.386	0.1495	0.0923	0.2244	0.5871	0.5647
cg04033580	0.9247	0.9487	0.9561	0.931	0.8892	0.9558	0.8875	0.4706	0.9521	0.9476	0.7096	0.9425	0.7715	0.7972	0.6788	0.9361	0.9636	0.8878	0.9424	0.6698	0.9674	0.9587	0.9184	0.9539	0.8965	0.7643	0.9385	0.9304	0.8897	0.9589	0.9403	0.9486	0.9576	0.9521	0.9495	0.9443	0.9525	0.963	0.9081	0.655	0.9589	0.9508	0.9623	0.8132	0.9594	0.9323	0.9547	0.9529	0.6253
cg24372550	0.0308	0.0518	0.0428	0.031	0.0465	0.033	0.0478	0.0418	0.0395	0.0473	0.0279	0.0332	0.0291	0.0293	0.0591	0.033	0.0363	0.0377	0.0483	0.0408	0.0551	0.0412	0.0467	0.0338	0.0315	0.0429	0.0513	0.025	0.0261	0.0417	0.0361	0.0491	0.0575	0.0439	0.0298	0.0503	0.0375	0.0264	0.034	0.0247	0.0513	0.0334	0.0359	0.0321	0.0588	0.0687	0.0515	0.0481	0.0411
cg09276363	0.5758	0.4538	0.6372	0.6516	0.4823	0.4824	0.6905	0.3084	0.593	0.4503	0.7139	0.6433	0.4697	0.1219	0.4466	0.5043	0.7352	0.2892	0.4898	0.1956	0.5911	0.6366	0.4415	0.6841	0.686	0.5869	0.5648	0.2971	0.3634	0.7017	0.8021	0.5567	0.4885	0.5013	0.4071	0.3976	0.4503	0.5666	0.3405	0.6227	0.7594	0.6108	0.7217	0.2289	0.392	0.5376	0.581	0.4281	0.6594
cg04930858	0.6845	0.8564	0.7846	0.7532	0.4864	0.9076	0.9294	0.7144	0.9163	0.6424	0.9033	0.6201	0.2763	0.2882	0.7527	0.6909	0.9061	0.2413	0.8968	0.5026	0.9391	0.7295	0.6369	0.8844	0.8327	0.5928	0.8957	0.6726	0.7315	0.6769	0.9252	0.5659	0.5121	0.8262	0.434	0.7973	0.7842	0.8618	0.752	0.4593	0.9428	0.613	0.8796	0.2585	0.751	0.9024	0.8176	0.8155	0.3717
cg20282550	0.4549	0.3969	0.5571	0.4856	0.5814	0.452	0.3912	0.7287	0.8763	0.4	0.4505	0.722	0.5723	0.9147	0.8522	0.5186	0.7386	0.9074	0.5668	0.7282	0.3752	0.6627	0.7428	0.5946	0.7658	0.5682	0.1954	0.3553	0.1418	0.6092	0.8206	0.3684	0.5969	0.581	0.4792	0.5728	0.5014	0.1865	0.2477	0.1375	0.7522	0.6575	0.696	0.4003	0.6669	0.5445	0.316	0.5661	0.3415
cg19466180	0.012	0.0225	0.0427	0.0215	0.0174	0.0219	0.0359	0.0242	0.0219	0.0223	0.0168	0.0205	0.0205	0.8581	0.0176	0.0202	0.015	0.019	0.0229	0.0191	0.0244	0.0398	0.0206	0.0241	0.0248	0.0189	0.0201	0.0181	0.0171	0.0221	0.0211	0.0213	0.024	0.0217	0.0157	0.0281	0.0315	0.0218	0.0164	0.0273	0.7196	0.4939	0.0213	0.0164	0.0205	0.0249	0.0328	0.0211	0.0243
cg13632058	0.0456	0.095	0.0745	0.0384	0.0415	0.0313	0.047	0.0533	0.0782	0.0563	0.0439	0.0526	0.0532	0.9292	0.0432	0.0504	0.0402	0.0383	0.0833	0.0531	0.0585	0.0592	0.5977	0.0533	0.0241	0.0519	0.0584	0.0682	0.0577	0.0614	0.053	0.0484	0.0709	0.0593	0.0537	0.0505	0.0463	0.0455	0.0453	0.0489	0.5089	0.4139	0.0709	0.0339	0.0473	0.0477	0.0547	0.0639	0.0561
cg21427213	0.5495	0.6592	0.3112	0.1966	0.7349	0.318	0.6072	0.233	0.2466	0.5202	0.5308	0.1536	0.3564	0.7849	0.3131	0.3175	0.4153	0.7592	0.0877	0.3765	0.365	0.6702	0.2495	0.7606	0.3608	0.3797	0.3911	0.4327	0.5985	0.2934	0.4342	0.4949	0.646	0.3003	0.4194	0.2185	0.7281	0.3618	0.306	0.4176	0.9024	0.8453	0.4125	0.5529	0.2031	0.5717	0.5367	0.5927	0.57
cg05021896	0.0402	0.0518	0.1271	0.0334	0.0369	0.0544	0.081	0.0384	0.0479	0.1025	0.063	0.0728	0.0719	0.0559	0.0379	0.0581	0.0252	0.0351	0.1001	0.0464	0.1063	0.1123	0.0931	0.0609	0.2569	0.0711	0.0908	0.0608	0.0416	0.0596	0.0534	0.1175	0.0894	0.0491	0.0357	0.0969	0.057	0.0483	0.0488	0.0935	0.0892	0.0389	0.0678	0.0293	0.0918	0.0962	0.0913	0.0371	0.0428
cg17583946	0.6321	0.0729	0.1547	0.065	0.0536	0.0633	0.1116	0.0671	0.0466	0.1741	0.2792	0.0823	0.2603	0.8868	0.2282	0.0788	0.0355	0.0732	0.0902	0.0516	0.096	0.0567	0.145	0.0833	0.0409	0.065	0.1335	0.1084	0.1349	0.108	0.0313	0.2043	0.2835	0.0814	0.5226	0.309	0.0855	0.1184	0.0789	0.0736	0.5522	0.7313	0.1345	0.0659	0.1789	0.1239	0.1951	0.0927	0.056
cg16066294	0.0622	0.0697	0.0593	0.0477	0.0496	0.0355	0.0536	0.09	0.0644	0.0533	0.0822	0.0458	0.1411	0.0758	0.0519	0.0597	0.0632	0.0465	0.0641	0.1165	0.06	0.0946	0.0467	0.1118	0.1653	0.0604	0.0522	0.0495	0.0547	0.0681	0.0704	0.0479	0.0455	0.0926	0.0466	0.0827	0.1062	0.0675	0.0474	0.0654	0.0534	0.0577	0.0681	0.0704	0.0577	0.0569	0.0474	0.0682	0.114
cg10558616	0.0414	0.085	0.0305	0.0162	0.1297	0.0278	0.0346	0.028	0.0412	0.0208	0.0444	0.0198	0.0227	0.8411	0.0223	0.0348	0.0664	0.0225	0.0306	0.0261	0.0266	0.0334	0.0335	0.1999	0.1011	0.0301	0.0196	0.0274	0.0307	0.023	0.033	0.0287	0.0331	0.025	0.0798	0.0279	0.0253	0.0431	0.0216	0.021	0.4472	0.5367	0.0403	0.0273	0.0223	0.0224	0.05	0.0733	0.0323
cg01729862	0.0238	0.0144	0.0223	0.0135	0.0144	0.0165	0.0238	0.0184	0.0162	0.026	0.0193	0.0266	0.0189	0.0228	0.0225	0.0243	0.0153	0.0157	0.0208	0.019	0.0207	0.024	0.0236	0.0203	0.0298	0.0205	0.0186	0.0161	0.0203	0.018	0.0223	0.0235	0.0202	0.0228	0.0132	0.0212	0.016	0.0253	0.0154	0.0193	0.0258	0.0313	0.0194	0.0138	0.0247	0.0289	0.0219	0.0269	0.0193
cg22511947	0.0729	0.0748	0.0634	0.0591	0.0738	0.0703	0.0574	0.0952	0.0572	0.0685	0.0634	0.0469	0.0853	0.0736	0.0636	0.0862	0.0575	0.0592	0.0462	0.081	0.0612	0.0799	0.0604	0.1146	0.0422	0.042	0.0484	0.0705	0.071	0.0544	0.0726	0.0665	0.0766	0.0851	0.0634	0.0555	0.0824	0.0668	0.0675	0.0682	0.0895	0.0578	0.0791	0.0495	0.0671	0.0517	0.0734	0.1032	0.0854
cg08928646	0.0433	0.049	0.0407	0.0335	0.0425	0.0327	0.039	0.0526	0.051	0.0436	0.0405	0.0339	0.0641	0.0449	0.0554	0.067	0.0376	0.0353	0.0294	0.0503	0.0401	0.0563	0.0461	0.0577	0.0341	0.0354	0.0364	0.0317	0.0357	0.0395	0.0523	0.0411	0.0429	0.0481	0.0488	0.0369	0.0469	0.0416	0.0312	0.0429	0.0425	0.0408	0.0566	0.0325	0.0468	0.0415	0.0464	0.0568	0.0437
cg21990700	0.4095	0.4813	0.5588	0.2925	0.5049	0.4046	0.7339	0.3877	0.1696	0.5638	0.6541	0.6814	0.6778	0.549	0.5101	0.4495	0.4974	0.6463	0.2692	0.5914	0.3625	0.1337	0.6438	0.7929	0.5509	0.3687	0.2131	0.4756	0.2809	0.1378	0.5905	0.3983	0.7011	0.0975	0.7075	0.3662	0.2207	0.3815	0.4498	0.6707	0.8873	0.9087	0.7533	0.1223	0.5147	0.6328	0.7036	0.5798	0.7122
cg00277898	0.0637	0.0604	0.0608	0.0606	0.0334	0.0536	0.0886	0.1007	0.0562	0.0636	0.1454	0.0486	0.0455	0.0863	0.0478	0.0671	0.3285	0.0437	0.0467	0.0468	0.0744	0.0393	0.132	0.0483	0.0498	0.0432	0.053	0.081	0.0709	0.0368	0.0563	0.0616	0.1044	0.0302	0.0562	0.0466	0.0401	0.0541	0.0534	0.0423	0.4555	0.2222	0.0398	0.0959	0.0718	0.0555	0.085	0.1073	0.0846
cg10824491	0.0153	0.0216	0.0422	0.0133	0.0141	0.0186	0.0299	0.0198	0.0283	0.0253	0.0183	0.0334	0.0218	0.0209	0.0255	0.0287	0.0188	0.0186	0.0309	0.0206	0.0295	0.0219	0.0266	0.0185	0.0262	0.0279	0.0301	0.0153	0.0146	0.0207	0.0234	0.0286	0.0269	0.0211	0.0192	0.0263	0.023	0.0198	0.0138	0.0264	0.0301	0.0159	0.0205	0.0216	0.0399	0.0317	0.0269	0.0235	0.0175
cg12341179	0.0702	0.0716	0.0571	0.0387	0.0295	0.0382	0.0418	0.0886	0.0536	0.0582	0.1006	0.0763	0.0533	0.0548	0.0618	0.0478	0.0698	0.0562	0.0478	0.0953	0.0449	0.0576	0.0683	0.0637	0.0567	0.0719	0.0541	0.0413	0.0621	0.0717	0.1069	0.0649	0.0676	0.0477	0.0504	0.0334	0.0732	0.0431	0.05	0.1132	0.0697	0.0516	0.0635	0.047	0.0496	0.0477	0.0698	0.0842	0.0979
cg19724668	0.01102	0.0128	0.0082	0.0088	0.0086	0.0081	0.0126	0.0147	0.0088	0.0114	0.0097	0.0125	0.0082	0.0086	0.0132	0.0101	0.0088	0.0085	0.0111	0.0094	0.0107	0.0095	0.011	0.0096	0.01059	0.012	0.0126	0.0082	0.3326	0.0089	0.0095	0.0103	0.013	0.009	0.0089	0.0111	0.0096	0.0088	0.009	0.0089	0.0094	0.0147	0.009	0.0077	0.0095	0.0102	0.0102	0.0133	0.0095
cg07993547	0.0291	0.0321	0.0306	0.0367	0.0343	0.028	0.0333	0.0468	0.051	0.0315	0.0528	0.0313	0.0478	0.0454	0.0319	0.0539	0.0323	0.0309	0.0298	0.0415	0.033	0.0462	0.0258	0.0376	0.0312	0.0297	0.0283	0.0319	0.0334	0.0589	0.0391	0.0287	0.0314	0.0438	0.0437	0.0297	0.0511	0.0488	0.0339	0.0454	0.048	0.0485	0.0624	0.0326	0.0323	0.0277	0.0414	0.0714	0.0556
cg22871253	0.2964	0.5034	0.1934	0.0623	0.2369	0.2553	0.3927	0.1362	0.7555	0.2867	0.183	0.0872	0.5725	0.8167	0.4624	0.279	0.11	0.5654	0.2304	0.5307	0.1995	0.7262	0.3574	0.5698	0.2427	0.1599	0.2154	0.3737	0.3444	0.271	0.242	0.4002	0.6428	0.1145	0.7052	0.2652	0.17	0.4034	0.2045	0.5511	0.7699	0.9179	0.3608	0.164	0.3545	0.281	0.3734	0.4083	0.3079
cg00658394	0.056	0.0629	0.0778	0.049	0.0393	0.0509	0.0733	0.0623	0.0656	0.0663	0.0593	0.0744	0.0656	0.0493	0.0578	0.0533	0.0547	0.0674	0.0685	0.0497	0.0752	0.0504	0.0814	0.0661	0.0636	0.0738	0.0616	0.0579	0.0559	0.0586	0.0651	0.072	0.0624	0.0646	0.0582	0.0625	0.0537	0.0583	0.0413	0.0611	0.067	0.0474	0.0597	0.0522	0.0705	0.0666	0.0777	0.0621	0.065
cg05396178	0.0309	0.0393	0.094	0.0705	0.0782	0.0551	0.1362	0.0308	0.0399	0.1315	0.0609	0.063	0.1256	0.1251	0.0371	0.0421	0.0672	0.0493	0.081	0.0774	0.1361	0.1202	0.1255	0.0196	0.0358	0.0677	0.0839	0.0377	0.0753	0.0883	0.026	0.1154	0.1059	0.0652	0.0228	0.0909	0.1062	0.0346	0.0213	0.0404	0.2133	0.0667	0.0322	0.0468	0.1055	0.114	0.136	0.0226	0.0327
cg09070371	0.1442	0.1642	0.0557	0.0268	0.0434	0.0956	0.0411	0.3592	0.0348	0.4409	0.06	0.0384	0.0399	0.039	0.032	0.0536	0.0722	0.0286	0.0428	0.0351	0.0557	0.0517	0.1807	0.0801	0.0251	0.0414	0.101	0.0461	0.2266	0.0249	0.0399	0.0367	0.0469	0.3497	0.0231	0.0704	0.0404	0.0332	0.0704	0.025	0.0765	0.024	0.0698	0.0305	0.0368	0.0519	0.0341	0.2526	0.0259
cg00739582	0.5516	0.7576	0.5731	0.79	0.4594	0.9396	0.6126	0.9123	0.8802	0.8227	0.9436	0.4906	0.3865	0.4985	0.1414	0.8479	0.9447	0.9139	0.4321	0.8659	0.9249	0.7847	0.8694	0.8566	0.5666	0.4013	0.7897	0.8894	0.862	0.849	0.6739	0.7134	0.5497	0.602	0.6241	0.7971	0.7046	0.6866	0.6983	0.9117	0.9204	0.9041	0.9045	0.5813	0.6589	0.8616	0.7706	0.9373	0.3211
cg10573932	0.0799	0.0788	0.0746	0.0465	0.0665	0.0669	0.0801	0.0592	0.0418	0.0884	0.281	0.0523	0.0689	0.0558	0.0421	0.1084	0.2825	0.0612	0.0814	0.0718	0.0973	0.1856	0.0612	0.1551	0.0774	0.0601	0.0911	0.0954	0.1149	0.069	0.1028	0.0855	0.071	0.0595	0.0717	0.0878	0.0748	0.0981	0.0541	0.0875	0.7557	0.1633	0.0714	0.0521	0.0426	0.0926	0.0969	0.3107	0.0784
cg04839664	0.0183	0.0558	0.0861	0.0171	0.0388	0.0168	0.034	0.0227	0.015	0.0398	0.0752	0.0406	0.0437	0.8489	0.4261	0.0211	0.0155	0.0143	0.0209	0.023	0.0431	0.0234	0.0202	0.1709	0.0136	0.0263	0.3074	0.0164	0.0187	0.0256	0.3533	0.0556	0.1012	0.0196	0.1123	0.0305	0.0145	0.0214	0.0208	0.0296	0.6653	0.5819	0.3205	0.0164	0.0331	0.0217	0.0781	0.136	0.0162
cg19701246	0.576	0.8302	0.9419	0.8698	0.8907	0.9266	0.9326	0.8045	0.7918	0.931	0.8878	0.9371	0.8698	0.8303	0.9046	0.8509	0.9325	0.7541	0.91	0.7214	0.961	0.8065	0.9381	0.8183	0.727	0.9122	0.9134	0.8478	0.8624	0.9121	0.8826	0.947	0.9241	0.8161	0.9005	0.9291	0.8584	0.8663	0.8185	0.8445	0.9525	0.9099	0.8432	0.9447	0.8877	0.9396	0.914	0.7846	0.8268
cg26960562	0.0712	0.0713	0.1055	0.0583	0.0832	0.0626	0.0867	0.0683	0.0636	0.0811	0.0767	0.069	0.0617	0.3484	0.06	0.0822	0.0565	0.0631	0.0994	0.0643	0.0945	0.1443	0.0768	0.0613	0.0537	0.0852	0.101	0.0723	0.0516	0.0682	0.0656	0.1194	0.0992	0.0741	0.0578	0.1186	0.1164	0.0671	0.0815	0.0679	0.0768	0.0918	0.0691	0.0694	0.0862	0.0822	0.0746	0.0826	0.0574
cg19596991	0.0163	0.0179	0.0165	0.0138	0.0158	0.0123	0.0184	0.0204	0.0172	0.0225	0.0151	0.0166	0.0168	0.0146	0.0247	0.0207	0.0154	0.0142	0.0176	0.0188	0.0201	0.0151	0.0152	0.0174	0.0128	0.0149	0.0154	0.0126	0.0122	0.015	0.0147	0.0198	0.0224	0.0153	0.0121	0.016	0.0143	0.0154	0.0138	0.0163	0.0204	0.0135	0.0174	0.0135	0.0178	0.0244	0.0189	0.0208	0.016
cg07586489	0.2068	0.2149	0.1199	0.1369	0.1314	0.0993	0.1859	0.1606	0.1214	0.2998	0.1549	0.1474	0.1723	0.4636	0.1341	0.1344	0.1767	0.088	0.1049	0.1313	0.1536	0.1502	0.1839	0.2065	0.3609	0.1305	0.1333	0.1217	0.1098	0.1572	0.1487	0.2393	0.2328	0.131	0.1549	0.1563	0.1221	0.1175	0.1032	0.174	0.8066	0.3671	0.1791	0.0837	0.1661	0.25	0.2042	0.1785	0.1526
cg08923450	0.0393	0.0301	0.0364	0.0238	0.0232	0.0168	0.0396	0.0246	0.037	0.0274	0.0436	0.0296	0.0274	0.0458	0.0314	0.0377	0.0245	0.0251	0.0248	0.0345	0.0379	0.0574	0.0339	0.0344	0.0207	0.0363	0.0302	0.0277	0.0159	0.0367	0.0361	0.0424	0.0364	0.034	0.0294	0.0451	0.03	0.043	0.0214	0.0349	0.0801	0.0165	0.0414	0.0255	0.0418	0.0304	0.0304	0.0217	0.0384
cg06179159	0.0345	0.0408	0.0512	0.032	0.0396	0.0438	0.0458	0.0322	0.0468	0.0587	0.029	0.0516	0.0431	0.0555	0.0316	0.0375	0.0412	0.0359	0.0454	0.0269	0.0534	0.0469	0.0606	0.0414	0.045	0.0506	0.0383	0.0418	0.0562	0.0473	0.0433	0.0563	0.0487	0.0317	0.0271	0.0552	0.038	0.053	0.0288	0.0347	0.0595	0.0521	0.0469	0.0344	0.0567	0.052	0.0611	0.0291	0.0347
cg02685016	0.0544	0.0477	0.0549	0.0471	0.0419	0.0459	0.0615	0.0421	0.1137	0.0409	0.0772	0.0443	0.0665	0.8943	0.0475	0.0621	0.0686	0.0482	0.0505	0.2516	0.036	0.0674	0.0602	0.0602	0.0435	0.0368	0.0464	0.0369	0.0362	0.0537	0.0389	0.0622	0.0536	0.0625	0.189	0.0431	0.0443	0.0431	0.0404	0.0462	0.8592	0.8116	0.0569	0.0481	0.0448	0.0475	0.0491	0.1035	0.051
cg01564892	0.0461	0.031	0.0403	0.0219	0.0321	0.0213	0.0449	0.0315	0.0266	0.0399	0.0305	0.0323	0.0356	0.5039	0.0275	0.0342	0.0348	0.0237	0.032	0.0358	0.046	0.0343	0.0573	0.0347	0.0219	0.0297	0.0272	0.0303	0.035	0.0383	0.0407	0.0338	0.0375	0.0355	0.0338	0.0417	0.0258	0.0289	0.0248	0.0344	0.1869	0.0405	0.0318	0.0236	0.0397	0.0414	0.0442	0.0343	0.0279
cg27019245	0.0202	0.0201	0.0177	0.0144	0.0156	0.0128	0.0197	0.0178	0.0215	0.0858	0.0151	0.0195	0.0141	0.1263	0.0183	0.0199	0.0221	0.0133	0.02	0.0144	0.0157	0.015	0.0166	0.0187	0.015	0.0164	0.0171	0.0252	0.0148	0.0144	0.0209	0.0172	0.018	0.0172	0.0166	0.0205	0.0151	0.0121	0.0188	0.0143	0.0282	0.0213	0.0885	0.0139	0.0167	0.0165	0.0155	0.0237	0.0172
cg12961656	0.1293	0.086	0.0742	0.0536	0.0891	0.0583	0.0571	0.0787	0.1245	0.0836	0.1082	0.0532	0.1013	0.2535	0.0667	0.1092	0.0727	0.0664	0.0469	0.1026	0.084	0.1556	0.0857	0.1008	0.0328	0.0601	0.0708	0.0634	0.0592	0.1357	0.0868	0.0874	0.054	0.1021	0.0862	0.0834	0.0932	0.1317	0.0796	0.1124	0.08	0.09	0.2576	0.043	0.0638	0.0721	0.0764	0.0946	0.1487
cg08831348	0.0494	0.0308	0.0296	0.0403	0.6544	0.0517	0.0377	0.0525	0.9416	0.2494	0.0444	0.0287	0.0519	0.9307	0.0362	0.0745	0.207	0.7418	0.0515	0.5157	0.0227	0.043	0.0707	0.2766	0.0467	0.0423	0.5377	0.3228	0.2035	0.0304	0.0593	0.0539	0.3325	0.0333	0.8489	0.1688	0.0433	0.0425	0.0601	0.0355	0.8403	0.8481	0.0385	0.6966	0.0435	0.0557	0.4973	0.0901	0.3311
cg24667625	0.0594	0.0377	0.0524	0.0365	0.0495	0.0337	0.0406	0.0404	0.033	0.0478	0.0508	0.0394	0.0317	0.7043	0.0451	0.0332	0.0358	0.035	0.0451	0.0319	0.0538	0.0406	0.0424	0.0299	0.026	0.0374	0.0428	0.0351	0.0416	0.0455	0.0376	0.0541	0.0586	0.0323	0.0326	0.0462	0.028	0.0374	0.0402	0.035	0.5957	0.0236	0.0338	0.0455	0.0611	0.0469	0.0613	0.0494	0.0405
cg02835036	0.0355	0.0342	0.0489	0.0482	0.048	0.0404	0.0471	0.053	0.0454	0.0522	0.1159	0.041	0.0692	0.0513	0.0369	0.0654	0.0467	0.05	0.0435	0.061	0.0436	0.0774	0.056	0.0552	0.035	0.0403	0.032	0.0485	0.0343	0.061	0.0458	0.064	0.0437	0.0728	0.055	0.0456	0.0468	0.0649	0.0419	0.0647	0.071	0.0314	0.0568	0.0383	0.046	0.0556	0.0466	0.0419	0.0694
cg03760387	0.1322	0.122	0.167	0.1027	0.1287	0.1147	0.1767	0.1071	0.1253	0.1599	0.1264	0.1446	0.1354	0.1391	0.1184	0.134	0.1148	0.1052	0.1409	0.0703	0.1749	0.1521	0.1446	0.1266	0.086	0.1571	0.1265	0.1007	0.1406	0.125	0.1645	0.1441	0.1249	0.1227	0.1025	0.1549	0.1057	0.141	0.0857	0.157	0.1653	0.1346	0.1239	0.1262	0.1649	0.1637	0.1648	0.1137	0.1091
cg03934257	0.8685	0.7001	0.8446	0.748	0.7306	0.5945	0.6751	0.5708	0.7393	0.8107	0.7353	0.7102	0.6304	0.7006	0.5686	0.6893	0.6535	0.4439	0.6766	0.4753	0.8304	0.7287	0.7254	0.7374	0.8286	0.5785	0.7512	0.7918	0.8294	0.7653	0.7474	0.736	0.7328	0.5271	0.7558	0.796	0.7578	0.732	0.6872	0.6276	0.7826	0.6389	0.8233	0.7944	0.6961	0.7315	0.7651	0.6414	0.6435
cg11631518	0.0638	0.0349	0.1069	0.0607	0.0369	0.0582	0.0531	0.1284	0.0369	0.3132	0.4348	0.0314	0.0246	0.0265	0.0341	0.0269	0.102	0.0328	0.0527	0.3573	0.0631	0.0372	0.3783	0.2073	0.0336	0.2673	0.0467	0.2203	0.1036	0.0517	0.1236	0.0833	0.097	0.2148	0.0381	0.3257	0.0343	0.0402	0.0703	0.0369	0.058	0.1366	0.3231	0.2744	0.0539	0.1379	0.0992	0.1703	0.0548
cg16818414	0.0422	0.0253	0.0226	0.0174	0.0157	0.0141	0.0202	0.3825	0.0217	0.0229	0.0153	0.024	0.0206	0.0301	0.0183	0.0247	0.0255	0.0222	0.0206	0.0193	0.0217	0.0223	0.0214	0.3857	0.0508	0.021	0.0199	0.0164	0.0181	0.031	0.0463	0.0212	0.0191	0.1052	0.0176	0.0232	0.0218	0.0198	0.0159	0.0223	0.04	0.0252	0.0195	0.0178	0.0206	0.0554	0.0157	0.0251	0.0242
cg02569458	0.0306	0.055	0.0626	0.0354	0.0414	0.0482	0.0554	0.0494	0.0369	0.06	0.0693	0.0456	0.0554	0.1192	0.0423	0.0424	0.0425	0.0412	0.0573	0.0493	0.0592	0.0466	0.0518	0.0889	0.0376	0.0614	0.0583	0.072	0.0396	0.0506	0.0363	0.1096	0.1158	0.0488	0.0714	0.0552	0.0348	0.0524	0.1556	0.0403	0.1135	0.0588	0.0612	0.0301	0.0662	0.0624	0.0677	0.0475	0.0338
cg19980381	0.1339	0.0688	0.067	0.1044	0.0567	0.0914	0.0782	0.0762	0.1526	0.1412	0.085	0.0822	0.0957	0.1022	0.0749	0.0562	0.1396	0.0673	0.0606	0.1204	0.1011	0.1193	0.1299	0.1576	0.0815	0.0516	0.07	0.0391	0.0418	0.1819	0.1299	0.0974	0.0915	0.2474	0.0454	0.0712	0.094	0.1464	0.0703	0.1619	0.1023	0.0519	0.1498	0.07	0.0876	0.1029	0.0987	0.0794	0.1209
cg21867468	0.0854	0.0721	0.0739	0.0954	0.1062	0.0524	0.0493	0.0717	0.0784	0.0509	0.5211	0.0406	0.078	0.0515	0.0898	0.0953	0.5894	0.0601	0.0336	0.0573	0.0538	0.0907	0.0596	0.1195	0.1077	0.0476	0.043	0.068	0.067	0.0553	0.4301	0.1182	0.058	0.1417	0.075	0.0523	0.0791	0.0798	0.0833	0.094	0.0584	0.0722	0.0862	0.0604	0.0485	0.0682	0.0537	0.115	0.1062
cg24343312	0.0272	0.0324	0.0294	0.0252	0.0262	0.0225	0.0275	0.0323	0.0225	0.0304	0.0233	0.0191	0.0386	0.0463	0.0256	0.032	0.0224	0.0255	0.0283	0.0406	0.0297	0.0291	0.0298	0.0335	0.0156	0.0202	0.0227	0.0289	0.0335	0.0216	0.0301	0.0364	0.0292	0.0349	0.0253	0.0278	0.0312	0.0249	0.0247	0.0237	0.0334	0.0275	0.0274	0.0208	0.026	0.0252	0.026	0.0355	0.0298
cg13696287	0.8283	0.8768	0.896	0.8145	0.4413	0.8816	0.5969	0.7103	0.8118	0.8521	0.4461	0.7982	0.2272	0.4048	0.7552	0.85	0.7202	0.5228	0.771	0.2853	0.632	0.7584	0.7847	0.8218	0.8078	0.8054	0.8775	0.827	0.8549	0.7707	0.7882	0.7216	0.6231	0.6048	0.6937	0.8232	0.6825	0.794	0.5591	0.6852	0.7646	0.8908	0.8321	0.5954	0.7776	0.689	0.5401	0.7113	0.6249
cg27275523	0.0431	0.0423	0.052	0.0376	0.035	0.032	0.1007	0.0364	0.0333	0.0417	0.0517	0.0403	0.0448	0.9104	0.041	0.0564	0.1192	0.0315	0.0316	0.0377	0.0518	0.0399	0.0414	0.0801	0.048	0.0289	0.037	0.0412	0.0349	0.0389	0.031	0.0495	0.0505	0.0403	0.0681	0.0383	0.0451	0.0385	0.0395	0.0428	0.8485	0.657	0.0701	0.0424	0.0316	0.0523	0.0978	0.0647	0.0685
cg16302441	0.8406	0.5314	0.3372	0.2961	0.7274	0.8299	0.9011	0.7446	0.3186	0.4195	0.868	0.6615	0.7518	0.9513	0.6256	0.8296	0.7012	0.7606	0.4911	0.5746	0.5322	0.8672	0.5701	0.7983	0.7867	0.6704	0.7149	0.5731	0.495	0.3887	0.9427	0.6053	0.6492	0.6998	0.5893	0.7738	0.6217	0.4568	0.5648	0.6909	0.8782	0.9159	0.8193	0.7838	0.8078	0.8543	0.7335	0.6525	0.4846
cg12820608	0.0335	0.0478	0.0727	0.0248	0.0501	0.0343	0.0774	0.0537	0.025	0.0768	0.0718	0.0674	0.0808	0.0374	0.0583	0.0958	0.1088	0.0423	0.0361	0.0678	0.0489	0.118	0.1264	0.0631	0.0725	0.0456	0.0363	0.0446	0.0431	0.0847	0.0536	0.106	0.122	0.0398	0.0542	0.0509	0.0333	0.0477	0.0429	0.0466	0.5869	0.351	0.0804	0.0332	0.0872	0.0928	0.0943	0.099	0.0588
cg13839457	0.0276	0.0224	0.024	0.0156	0.0144	0.0136	0.0172	0.0214	0.0152	0.0256	0.3726	0.0177	0.0172	0.7109	0.0187	0.0153	0.1528	0.0146	0.0178	0.0161	0.0209	0.0174	0.0251	0.0175	0.0315	0.0249	0.025	0.0163	0.023	0.0164	0.0205	0.0261	0.0286	0.0156	0.039	0.0222	0.0163	0.0197	0.0151	0.0176	0.1271	0.5206	0.0172	0.0151	0.0172	0.0241	0.0281	0.0269	0.0179
cg22351510	0.5412	0.4745	0.4314	0.1577	0.561	0.6397	0.8022	0.2508	0.2529	0.6401	0.6013	0.3741	0.7282	0.9109	0.5478	0.4048	0.9219	0.3164	0.3729	0.3484	0.7489	0.2218	0.6676	0.7595	0.49	0.6237	0.4397	0.5093	0.5649	0.724	0.9206	0.4314	0.3619	0.402	0.5554	0.2776	0.6267	0.2959	0.3825	0.3982	0.8688	0.7985	0.5693	0.3318	0.718	0.844	0.7803	0.5003	0.1489
cg10348138	0.0489	0.1585	0.0838	0.0573	0.0405	0.0879	0.0952	0.2747	0.0518	0.094	0.3305	0.0549	0.0486	0.0599	0.0682	0.0658	0.2956	0.0499	0.0704	0.0466	0.0587	0.0771	0.0709	0.2347	0.0805	0.0688	0.1963	0.0694	0.055	0.2204	0.0588	0.0872	0.078	0.1606	0.0548	0.1115	0.0524	0.0628	0.0608	0.0608	0.5118	0.0599	0.0921	0.0506	0.076	0.2527	0.2259	0.1485	0.2904
cg22926422	0.875	0.8697	0.9422	0.8896	0.9148	0.9354	0.9331	0.6227	0.848	0.9339	0.9093	0.9241	0.4916	0.8603	0.712	0.8619	0.5948	0.7751	0.7033	0.3123	0.9555	0.8704	0.8707	0.8771	0.7964	0.8255	0.9302	0.7579	0.8935	0.9392	0.919	0.8272	0.8422	0.899	0.9137	0.9268	0.8843	0.8913	0.8646	0.9076	0.9354	0.9308	0.9005	0.7918	0.9303	0.9478	0.9395	0.7612	0.7711
cg00319595	0.2701	0.4732	0.5598	0.1525	0.3045	0.1405	0.3248	0.1137	0.58	0.3049	0.3359	0.3107	0.1177	0.0678	0.0867	0.3136	0.0432	0.0628	0.3754	0.08	0.3249	0.905	0.1915	0.3373	0.2189	0.2647	0.4054	0.2522	0.5009	0.3191	0.1683	0.3202	0.2881	0.2836	0.3032	0.5042	0.431	0.3109	0.5064	0.2253	0.151	0.0889	0.4118	0.0979	0.2103	0.2019	0.3896	0.1672	0.0769
cg12320306	0.0294	0.0546	0.0498	0.0432	0.0411	0.0324	0.0444	0.0355	0.0333	0.0489	0.2518	0.0382	0.0701	0.0392	0.0371	0.031	0.0309	0.0568	0.0413	0.0372	0.0675	0.0395	0.0531	0.056	0.0287	0.0351	0.0532	0.0274	0.0284	0.0604	0.0517	0.0711	0.079	0.0294	0.0409	0.0412	0.0254	0.0382	0.0248	0.0524	0.0637	0.0619	0.0385	0.0334	0.0629	0.0767	0.0602	0.0408	0.0226
cg20084079	0.6358	0.8168	0.5735	0.4394	0.2212	0.5599	0.2281	0.1767	0.7913	0.5107	0.231	0.2264	0.1834	0.0655	0.4338	0.664	0.1565	0.0517	0.2897	0.164	0.5	0.674	0.4183	0.575	0.0744	0.3322	0.3461	0.4219	0.7093	0.2141	0.1946	0.3587	0.4463	0.2014	0.374	0.3634	0.7572	0.3296	0.5053	0.1187	0.1628	0.0895	0.2182	0.0867	0.4785	0.686	0.366	0.3197	0.1104
cg26207357	0.0163	0.0237	0.0213	0.0161	0.0126	0.0121	0.0204	0.0243	0.0144	0.0225	0.0187	0.0247	0.0228	0.8901	0.0205	0.0167	0.0464	0.0137	0.0167	0.0189	0.0201	0.0172	0.0179	0.0247	0.0146	0.0154	0.0183	0.1216	0.0156	0.0206	0.0192	0.0197	0.0256	0.018	0.0125	0.0187	0.0227	0.0205	0.0128	0.0177	0.4778	0.014	0.0181	0.0112	0.0179	0.0239	0.0187	0.0223	0.0273
cg03284870	0.0998	0.0196	0.017	0.0146	0.013	0.0159	0.0166	0.0346	0.0178	0.0191	0.0888	0.0194	0.0186	0.0214	0.02	0.0175	0.0155	0.0196	0.0176	0.0189	0.0178	0.0148	0.0206	0.0185	0.0382	0.019	0.0174	0.013	0.0199	0.0165	0.0148	0.0193	0.018	0.0162	0.0173	0.0185	0.0168	0.0151	0.0157	0.0153	0.0204	0.0211	0.016	0.0138	0.0153	0.0226	0.0182	0.0216	0.0167
cg15391302	0.0975	0.0776	0.013	0.0118	0.0759	0.0635	0.014	0.444	0.0154	0.0362	0.4819	0.0887	0.0141	0.0164	0.1116	0.0147	0.0115	0.0105	0.0152	0.0156	0.0131	0.0163	0.0742	0.0163	0.0518	0.0144	0.0143	0.0217	0.0115	0.0168	0.1863	0.0145	0.016	0.598	0.0137	0.0111	0.2921	0.0887	0.0268	0.1434	0.0119	0.0127	0.11	0.3175	0.4035	0.4969	0.0119	0.1499	0.0148
cg17790333	0.8605	0.8145	0.9162	0.8823	0.5642	0.9053	0.5736	0.2822	0.9253	0.9309	0.3475	0.7661	0.5491	0.1102	0.5674	0.9121	0.6511	0.5917	0.8717	0.7458	0.9457	0.7881	0.7297	0.6778	0.9332	0.6733	0.9035	0.7468	0.887	0.9361	0.8932	0.9196	0.8884	0.8913	0.791	0.8759	0.8942	0.8204	0.7826	0.7921	0.6652	0.7445	0.939	0.5471	0.7352	0.8766	0.9078	0.7089	0.6826
cg20245751	0.8512	0.9415	0.9491	0.9543	0.9356	0.942	0.9348	0.9466	0.9483	0.8944	0.4371	0.9099	0.6912	0.7673	0.8551	0.9349	0.5922	0.6263	0.935	0.5679	0.9461	0.9302	0.9254	0.9296	0.8613	0.9064	0.9237	0.9345	0.9647	0.9466	0.9281	0.9342	0.8338	0.9397	0.8199	0.8784	0.935	0.9466	0.9204	0.8853	0.9176	0.948	0.9385	0.7566	0.9394	0.9596	0.9277	0.888	0.8566
cg04559178	0.0218	0.0273	0.0732	0.0289	0.0281	0.0366	0.0716	0.0265	0.0229	0.0863	0.0371	0.061	0.0531	0.4032	0.0328	0.0306	0.0304	0.0309	0.0787	0.0517	0.0704	0.058	0.0738	0.0586	0.2286	0.0599	0.0584	0.0386	0.0207	0.0404	0.068	0.089	0.0868	0.0487	0.0222	0.0745	0.0541	0.0475	0.0231	0.0562	0.3265	0.1109	0.063	0.0228	0.0722	0.0676	0.0723	0.0304	0.0556
cg06208339	0.0288	0.098	0.0817	0.0338	0.05	0.0383	0.1263	0.0807	0.0722	0.0727	0.0427	0.0586	0.0635	0.9539	0.0846	0.1353	0.052	0.0368	0.0867	0.074	0.0568	0.0618	0.0607	0.0629	0.0439	0.0686	0.0895	0.0348	0.074	0.0781	0.0783	0.0742	0.0791	0.0737	0.0363	0.0788	0.0644	0.0385	0.0515	0.0811	0.5586	0.5394	0.0902	0.0447	0.085	0.082	0.0699	0.0842	0.0653
cg25039393	0.0438	0.051	0.0385	0.0294	0.0331	0.0316	0.0366	0.0559	0.1301	0.0392	0.0548	0.0277	0.0654	0.0542	0.0626	0.0786	0.0648	0.0383	0.043	0.0545	0.0332	0.0659	0.0401	0.0438	0.0235	0.0361	0.0298	0.0425	0.0259	0.035	0.0328	0.0405	0.0424	0.0442	0.0364	0.0525	0.042	0.0418	0.038	0.0321	0.1123	0.0411	0.0419	0.0463	0.0382	0.0365	0.0317	0.0475	0.0567
cg01911352	0.3882	0.0183	0.0204	0.0146	0.0154	0.0127	0.0165	0.0276	0.0386	0.0176	0.0164	0.0177	0.0181	0.0227	0.0184	0.017	0.0167	0.0166	0.0248	0.0155	0.0134	0.0181	0.0148	0.0161	0.0343	0.0226	0.0176	0.0123	0.0137	0.0294	0.0233	0.015	0.0176	0.0202	0.0133	0.014	0.0169	0.0163	0.0143	0.0139	0.0151	0.0179	0.0173	0.0126	0.0129	0.0148	0.0147	0.0173	0.0196
cg17668949	0.0229	0.0331	0.027	0.0207	0.0253	0.021	0.024	0.0698	0.0354	0.0258	0.0233	0.0284	0.0281	0.0326	0.028	0.0351	0.0193	0.03	0.024	0.0299	0.0256	0.0315	0.0263	0.0363	0.0244	0.0267	0.029	0.0246	0.0267	0.0318	0.0296	0.0319	0.0316	0.0309	0.0244	0.0311	0.0331	0.0314	0.0257	0.0331	0.0266	0.0243	0.0297	0.0177	0.0254	0.0254	0.0331	0.033	0.034
cg11739480	0.0463	0.0405	0.0571	0.0431	0.0417	0.0384	0.0397	0.0558	0.0664	0.0405	0.0399	0.0318	0.0641	0.0673	0.0384	0.0464	0.0709	0.036	0.0293	0.0439	0.0379	0.0562	0.0348	0.0869	0.0307	0.0295	0.0413	0.0399	0.063	0.0548	0.0368	0.0375	0.0426	0.0727	0.0378	0.0387	0.0525	0.0635	0.0492	0.0495	0.0429	0.0591	0.0539	0.0386	0.0369	0.037	0.0444	0.0455	0.042
cg07809452	0.1545	0.2503	0.1051	0.0734	0.0107	0.1036	0.0736	0.0224	0.0459	0.1957	0.0589	0.0307	0.0593	0.4461	0.0127	0.0135	0.0696	0.0129	0.0519	0.0267	0.1111	0.0144	0.0601	0.1311	0.0185	0.0426	0.043	0.0269	0.0602	0.0313	0.0284	0.064	0.0718	0.0531	0.0229	0.0429	0.2292	0.0302	0.0534	0.0202	0.3247	0.0481	0.2043	0.0172	0.0221	0.1359	0.1035	0.3385	0.0142
cg02110333	0.0451	0.0345	0.0379	0.0518	0.0534	0.0284	0.0456	0.0334	0.0291	0.1654	0.1146	0.0287	0.2159	0.123	0.036	0.0438	0.1043	0.2381	0.0299	0.064	0.0362	0.062	0.0458	0.0733	0.0264	0.0873	0.0329	0.0483	0.0374	0.0554	0.0711	0.0309	0.0413	0.0681	0.1002	0.0353	0.037	0.0742	0.0301	0.0476	0.0414	0.0382	0.0426	0.0383	0.0313	0.0472	0.0304	0.1796	0.0554
cg00990022	0.1612	0.164	0.1481	0.0349	0.3669	0.2066	0.1593	0.1355	0.0881	0.1822	0.5014	0.1423	0.3133	0.0653	0.0834	0.1055	0.457	0.0383	0.0793	0.088	0.064	0.1204	0.1527	0.2864	0.5549	0.0501	0.0531	0.212	0.0591	0.1709	0.1918	0.0898	0.1727	0.1372	0.2314	0.3231	0.0491	0.1244	0.2087	0.2553	0.7719	0.5217	0.2988	0.0278	0.072	0.3492	0.2144	0.2033	0.1722
cg12431087	0.149	0.1345	0.0912	0.0655	0.1392	0.1259	0.0808	0.158	0.0565	0.1494	0.1746	0.066	0.3822	0.4256	0.0674	0.1434	0.0598	0.5206	0.1565	0.2435	0.0804	0.5309	0.2617	0.1362	0.0311	0.1377	0.1619	0.2755	0.0855	0.1687	0.0409	0.1541	0.3099	0.0658	0.6265	0.1405	0.1196	0.1287	0.2516	0.451	0.6883	0.53	0.1375	0.174	0.0885	0.1305	0.1702	0.4998	0.2993
cg08918274	0.3695	0.0223	0.0286	0.0243	0.0223	0.0174	0.029	0.0283	0.0333	0.0412	0.0191	0.0338	0.0284	0.4702	0.0278	0.031	0.0246	0.0238	0.0351	0.0394	0.0313	0.0252	0.0424	0.0314	0.0388	0.0205	0.0207	0.0387	0.0152	0.0298	0.0363	0.0421	0.084	0.038	0.3	0.0288	0.021	0.0254	0.0239	0.027	0.4393	0.0445	0.0367	0.0259	0.0368	0.0364	0.0374	0.0511	0.0363
cg10022510	0.018	0.0208	0.0156	0.0118	0.0123	0.0131	0.0216	0.0169	0.0111	0.0147	0.013	0.0164	0.0163	0.5325	0.0215	0.0132	0.0132	0.0185	0.0149	0.013	0.0138	0.0134	0.0152	0.0195	0.0519	0.0161	0.016	0.0104	0.0134	0.0144	0.0128	0.013	0.0143	0.0125	0.0104	0.014	0.0126	0.0139	0.011	0.013	0.2353	0.0187	0.0135	0.0098	0.0151	0.0201	0.0205	0.019	0.0133
cg11632906	0.0548	0.0496	0.0489	0.026	0.0532	0.0532	0.0424	0.0797	0.0176	0.0991	0.0291	0.0282	0.2798	0.9479	0.0726	0.0224	0.149	0.1275	0.0343	0.2716	0.0369	0.0269	0.0597	0.0553	0.0755	0.069	0.033	0.1281	0.017	0.0313	0.2359	0.092	0.1907	0.0281	0.2963	0.0363	0.0289	0.0278	0.0364	0.0608	0.6542	0.5792	0.0736	0.0192	0.0613	0.0618	0.1466	0.1732	0.0281
cg03347416	0.0341	0.1626	0.0646	0.0543	0.0521	0.0377	0.0792	0.1032	0.1392	0.0521	0.0929	0.0485	0.0795	0.0738	0.0935	0.1657	0.0568	0.0409	0.0333	0.066	0.0557	0.0923	0.0479	0.1069	0.0682	0.0556	0.0495	0.0614	0.0578	0.0576	0.0721	0.0543	0.0585	0.0988	0.0571	0.0621	0.0756	0.0723	0.0578	0.0764	0.0531	0.0667	0.1055	0.0353	0.0581	0.0608	0.0829	0.1832	0.1012
cg23581183	0.2283	0.257	0.285	0.1099	0.2933	0.2205	0.2939	0.2071	0.2036	0.3846	0.4243	0.2389	0.2952	0.6916	0.2634	0.3045	0.414	0.3439	0.2479	0.2433	0.2418	0.2228	0.3143	0.3838	0.2772	0.3152	0.2968	0.3939	0.3499	0.2272	0.2409	0.3216	0.2937	0.2189	0.3081	0.2735	0.3164	0.2537	0.3428	0.3021	0.7571	0.6488	0.2105	0.2026	0.2615	0.3213	0.3852	0.404	0.3803
cg14088357	0.0197	0.0289	0.0303	0.0202	0.0222	0.0224	0.0339	0.0223	0.0218	0.0406	0.0296	0.0191	0.0209	0.0243	0.0233	0.0396	0.0167	0.0165	0.0204	0.0209	0.0245	0.0514	0.0317	0.0245	0.014	0.019	0.0306	0.0256	0.0169	0.021	0.0388	0.0328	0.0438	0.0277	0.0229	0.0647	0.0214	0.0253	0.0362	0.0507	0.0381	0.0216	0.0226	0.0177	0.0779	0.0445	0.0252	0.0571	0.0397
cg15617545	0.6053	0.5851	0.4366	0.1902	0.4714	0.4268	0.6556	0.3534	0.3191	0.4793	0.4954	0.4578	0.6303	0.8305	0.4999	0.4224	0.489	0.6922	0.3296	0.5153	0.2586	0.4612	0.4689	0.779	0.3028	0.4088	0.4884	0.5054	0.5623	0.4792	0.6329	0.4855	0.5764	0.372	0.5836	0.3876	0.5054	0.657	0.5539	0.6302	0.8802	0.8425	0.7767	0.2971	0.3893	0.6668	0.533	0.5782	0.4128
cg03055499	0.0404	0.0392	0.0416	0.034	0.0452	0.0329	0.0375	0.039	0.0386	0.0358	0.0341	0.0287	0.0521	0.045	0.0412	0.0382	0.0615	0.0295	0.0276	0.0391	0.0333	0.0431	0.0327	0.0467	0.0346	0.0285	0.0308	0.0298	0.0307	0.0387	0.0484	0.035	0.0365	0.0513	0.025	0.0322	0.0404	0.0528	0.0375	0.0359	0.0765	0.0349	0.0506	0.0293	0.0312	0.0447	0.0485	0.0595	0.0373
cg19987611	0.1578	0.3109	0.2574	0.0134	0.017	0.0128	0.0217	0.3158	0.0167	0.1517	0.3672	0.016	0.154	0.828	0.0163	0.0187	0.1175	0.3934	0.0145	0.0141	0.0973	0.0141	0.0208	0.0146	0.0132	0.0197	0.0158	0.0114	0.0132	0.0132	0.4123	0.0209	0.0177	0.1642	0.104	0.0203	0.0133	0.1938	0.2284	0.0135	0.5818	0.5113	0.2609	0.2261	0.0187	0.0188	0.0249	0.026	0.0161
cg10386045	0.0229	0.031	0.0307	0.0405	0.0247	0.0223	0.0311	0.0314	0.0393	0.0238	0.0317	0.0294	0.0259	0.0299	0.0345	0.0526	0.0211	0.0265	0.0426	0.0309	0.0381	0.0315	0.0242	0.0283	0.0232	0.0294	0.0311	0.026	0.0342	0.0241	0.0244	0.0318	0.0324	0.0328	0.0344	0.0472	0.0217	0.0312	0.0304	0.026	0.0443	0.0326	0.0244	0.021	0.0286	0.0346	0.0402	0.0386	0.034
cg11809091	0.6541	0.5589	0.1723	0.1885	0.8503	0.3923	0.3216	0.2484	0.3542	0.5294	0.5968	0.904	0.639	0.9247	0.7393	0.3503	0.9226	0.8166	0.2009	0.1217	0.2107	0.1662	0.2056	0.5849	0.4497	0.7833	0.6151	0.2776	0.2018	0.8875	0.6446	0.8138	0.4831	0.6514	0.5867	0.2599	0.5052	0.7001	0.3787	0.6584	0.7984	0.8616	0.4611	0.2101	0.2376	0.5136	0.5005	0.6957	0.7471
cg19136704	0.6769	0.7917	0.8227	0.6786	0.5087	0.8921	0.7236	0.7925	0.9212	0.7489	0.7115	0.5794	0.8266	0.1929	0.4597	0.8023	0.4097	0.5452	0.8023	0.5216	0.9083	0.6819	0.853	0.8565	0.4914	0.6056	0.795	0.6414	0.8834	0.8494	0.8792	0.7877	0.8172	0.5898	0.8063	0.7397	0.8592	0.8911	0.6231	0.5442	0.8983	0.8991	0.9054	0.7618	0.6452	0.8448	0.7734	0.6255	0.7713
cg22032900	0.8335	0.5756	0.8858	0.5465	0.377	0.8502	0.4042	0.5636	0.6893	0.6362	0.4839	0.7731	0.6119	0.2129	0.2432	0.7772	0.3133	0.6919	0.6847	0.443	0.89	0.7401	0.5384	0.8727	0.7307	0.5876	0.7976	0.6763	0.7949	0.6111	0.6712	0.8117	0.8408	0.6974	0.6272	0.8667	0.8716	0.5635	0.6773	0.7469	0.6148	0.7133	0.9093	0.6957	0.5884	0.7334	0.7666	0.7815	0.5096
cg00230271	0.0463	0.0401	0.0383	0.0267	0.03	0.0314	0.0372	0.0462	0.0325	0.0308	0.05	0.0292	0.0415	0.033	0.0367	0.037	0.0379	0.0271	0.0308	0.0326	0.0404	0.0458	0.0432	0.0294	0.0452	0.0306	0.0324	0.0377	0.0293	0.0368	0.0339	0.0451	0.0439	0.0331	0.0342	0.0424	0.0354	0.0388	0.0277	0.0341	0.0511	0.0416	0.0364	0.0344	0.0428	0.0368	0.0475	0.0391	0.0461
cg14529080	0.0463	0.0436	0.0406	0.0391	0.0419	0.0434	0.0408	0.044	0.0629	0.0499	0.0662	0.0477	0.0585	0.0504	0.0427	0.0846	0.041	0.0417	0.0332	0.0471	0.0383	0.054	0.0419	0.0444	0.0327	0.0366	0.0342	0.0411	0.0394	0.0434	0.0495	0.0485	0.052	0.0579	0.0429	0.0478	0.0491	0.0565	0.0462	0.0427	0.0402	0.0446	0.0409	0.0381	0.0468	0.0443	0.0427	0.0478	0.0428
cg16977570	0.0791	0.0148	0.0125	0.0134	0.0121	0.0092	0.0135	0.0163	0.0113	0.0121	0.0109	0.0125	0.0133	0.0165	0.0145	0.0135	0.0108	0.0114	0.0135	0.0116	0.0119	0.0129	0.0145	0.0162	0.0428	0.0155	0.0127	0.0113	0.0155	0.0127	0.0115	0.0105	0.0123	0.012	0.0114	0.0137	0.0127	0.0117	0.0109	0.0119	0.6107	0.3859	0.0122	0.0113	0.0114	0.0129	0.0115	0.0173	0.0139
cg02176961	0.0493	0.0254	0.0333	0.0185	0.0115	0.0179	0.0288	0.0254	0.0161	0.0271	0.0202	0.0305	0.0248	0.0232	0.0219	0.0166	0.0286	0.0188	0.0332	0.0224	0.0281	0.024	0.0233	0.0254	0.0347	0.0248	0.0296	0.0167	0.0204	0.0344	0.0234	0.0311	0.0213	0.0221	0.0155	0.0276	0.0323	0.019	0.0111	0.0267	0.0326	0.0322	0.0258	0.017	0.024	0.0248	0.0309	0.0265	0.0238
cg23889086	0.0204	0.0253	0.0213	0.0145	0.0163	0.02	0.0255	0.0247	0.0164	0.0197	0.0172	0.019	0.0197	0.9118	0.0215	0.0163	0.0202	0.0151	0.0182	0.0188	0.0206	0.0221	0.0219	0.0204	0.042	0.021	0.0197	0.0144	0.0275	0.0283	0.0482	0.02	0.0225	0.0238	0.0139	0.0255	0.0194	0.0199	0.0184	0.0214	0.7971	0.8015	0.0202	0.0201	0.0173	0.0214	0.0224	0.0294	0.0287
cg12580893	0.258	0.4381	0.5232	0.1017	0.1668	0.16	0.1637	0.4561	0.0524	0.5288	0.2796	0.2	0.2477	0.8722	0.413	0.3409	0.5707	0.1414	0.1215	0.2928	0.3702	0.381	0.4726	0.2718	0.7805	0.1596	0.3181	0.2957	0.2489	0.1568	0.4521	0.4594	0.1545	0.6148	0.1616	0.227	0.2566	0.2727	0.1941	0.4489	0.5866	0.5824	0.3703	0.122	0.3881	0.3151	0.3495	0.2637	0.1071
cg14615768	0.2945	0.1239	0.2675	0.1627	0.1905	0.176	0.265	0.1669	0.1176	0.2298	0.3085	0.162	0.3174	0.3265	0.2254	0.1132	0.4939	0.4047	0.0928	0.1992	0.2881	0.2919	0.2289	0.4486	0.184	0.2744	0.1648	0.1421	0.1174	0.332	0.1194	0.2679	0.3857	0.0896	0.3673	0.1501	0.076	0.1493	0.1269	0.2453	0.7356	0.2472	0.3356	0.1533	0.2458	0.2731	0.3364	0.2367	0.2719
cg17896897	0.7597	0.892	0.9172	0.8859	0.6042	0.9403	0.7317	0.2899	0.871	0.9193	0.6415	0.8862	0.764	0.2896	0.6668	0.7868	0.5563	0.6362	0.858	0.543	0.9136	0.8696	0.8732	0.5971	0.7654	0.4628	0.8914	0.6087	0.8692	0.8859	0.8534	0.8488	0.9211	0.8331	0.8654	0.9023	0.8903	0.8411	0.7245	0.6077	0.8339	0.7619	0.9016	0.6083	0.8215	0.6893	0.886	0.6593	0.4376
cg05305986	0.6147	0.6198	0.6502	0.6105	0.6319	0.6225	0.6168	0.639	0.6113	0.671	0.6907	0.5922	0.5647	0.6183	0.612	0.6267	0.6141	0.6549	0.6018	0.5975	0.6376	0.6634	0.6892	0.5987	0.6355	0.5967	0.5763	0.6591	0.6308	0.6807	0.5651	0.6738	0.6569	0.608	0.6525	0.62	0.5784	0.5873	0.5833	0.606	0.6617	0.6858	0.6268	0.5483	0.6293	0.6563	0.6743	0.6344	0.6148
cg05733917	0.9235	0.8799	0.9131	0.89	0.9	0.919	0.8984	0.8799	0.9012	0.9253	0.9148	0.9128	0.8926	0.8642	0.8816	0.8692	0.8814	0.8948	0.9203	0.9019	0.9155	0.8962	0.912	0.9072	0.9391	0.9016	0.9189	0.9325	0.9298	0.9268	0.9283	0.9101	0.9488	0.8629	0.9578	0.9196	0.8825	0.9153	0.904	0.9179	0.893	0.8864	0.8962	0.8897	0.9112	0.923	0.9265	0.8869	0.816
cg12692753	0.1153	0.1741	0.0698	0.0881	0.1164	0.0797	0.0673	0.2633	0.1711	0.0613	0.163	0.0717	0.1672	0.0862	0.1653	0.1145	0.0919	0.0761	0.0702	0.1503	0.0574	0.173	0.0451	0.153	0.105	0.0854	0.069	0.0749	0.095	0.1386	0.1335	0.0592	0.0666	0.2195	0.1355	0.1247	0.1153	0.2092	0.0955	0.1133	0.0482	0.0633	0.2103	0.109	0.0829	0.0543	0.0687	0.2081	0.1728
cg13356117	0.0399	0.3604	0.0089	0.0089	0.034	0.0476	0.0913	0.1944	0.0089	0.0115	0.2645	0.0858	0.5371	0.8731	0.717	0.0108	0.5552	0.4706	0.0123	0.5309	0.0094	0.0131	0.3123	0.0549	0.2095	0.3534	0.0126	0.3947	0.0111	0.1017	0.0157	0.1784	0.3996	0.0097	0.3776	0.0093	0.0705	0.1522	0.1351	0.6199	0.5747	0.6517	0.2181	0.0073	0.0143	0.398	0.2976	0.3928	0.2796
cg18257541	0.208	0.2467	0.2271	0.0817	0.1389	0.4235	0.1734	0.4514	0.4186	0.2186	0.4531	0.1139	0.2678	0.4771	0.0843	0.1714	0.6203	0.1813	0.1077	0.1565	0.1707	0.3625	0.2551	0.3054	0.2028	0.182	0.2271	0.2974	0.2539	0.468	0.475	0.1929	0.1655	0.0881	0.2472	0.1303	0.1701	0.4501	0.1907	0.2737	0.663	0.416	0.355	0.2403	0.1105	0.1726	0.1708	0.293	0.2984
cg03407996	0.8355	0.7726	0.9157	0.877	0.9138	0.8876	0.9433	0.5116	0.843	0.8454	0.8224	0.9061	0.7574	0.8179	0.8106	0.8063	0.8963	0.7941	0.8968	0.4654	0.9426	0.9128	0.7626	0.8797	0.5482	0.8423	0.8973	0.8231	0.8642	0.9268	0.9222	0.9216	0.9234	0.8274	0.8779	0.938	0.8608	0.9248	0.881	0.8869	0.9253	0.8656	0.9004	0.8813	0.9353	0.9338	0.8843	0.6934	0.8757
cg19134404	0.6527	0.7913	0.8327	0.7772	0.8119	0.8942	0.808	0.622	0.8098	0.836	0.87	0.7975	0.4448	0.3948	0.784	0.7304	0.4246	0.506	0.728	0.6789	0.8956	0.848	0.7665	0.9069	0.736	0.7198	0.8594	0.6072	0.9109	0.8286	0.845	0.8183	0.6493	0.5095	0.6545	0.8449	0.6961	0.8231	0.6613	0.6987	0.7726	0.7349	0.8489	0.5467	0.7632	0.8783	0.8676	0.7712	0.5123
cg23260991	0.0156	0.0237	0.0352	0.0155	0.1751	0.017	0.0186	0.0199	0.0115	0.0311	0.1912	0.0205	0.2086	0.536	0.0167	0.0328	0.0177	0.7938	0.0408	0.0166	0.0173	0.0244	0.025	0.1408	0.0151	0.0379	0.0198	0.0206	0.0602	0.0128	0.0136	0.0342	0.0433	0.0137	0.255	0.0361	0.0143	0.013	0.0229	0.0199	0.6444	0.4319	0.0187	0.0133	0.0374	0.1131	0.0226	0.0251	0.0131
cg05575601	0.0842	0.0776	0.1139	0.083	0.0702	0.0854	0.1214	0.0891	0.0995	0.0911	0.0745	0.0851	0.246	0.0745	0.0598	0.1202	0.0916	0.095	0.0947	0.1075	0.1187	0.0928	0.109	0.1066	0.0695	0.0813	0.0689	0.0797	0.0737	0.0973	0.1175	0.1145	0.0999	0.1347	0.1138	0.1151	0.076	0.0599	0.1222	0.1279	0.3341	0.0722	0.1454	0.0967	0.1117	0.0912	0.1032	0.0788	0.1316
cg05593349	0.018	0.0208	0.0202	0.0119	0.0141	0.0137	0.0194	0.0218	0.014	0.0163	0.1256	0.0169	0.0189	0.5267	0.0173	0.0182	0.0671	0.0129	0.0135	0.0185	0.0193	0.0182	0.0172	0.0174	0.0151	0.0142	0.0145	0.0102	0.0154	0.0166	0.0142	0.0188	0.0238	0.0176	0.0137	0.0178	0.0169	0.0156	0.0145	0.0141	0.0309	0.4477	0.0167	0.0121	0.0167	0.0207	0.0163	0.0172	0.0194
cg22860848	0.2848	0.8379	0.8654	0.5426	0.4706	0.7492	0.4319	0.4034	0.7236	0.6941	0.4439	0.5522	0.3342	0.1935	0.2579	0.5723	0.4961	0.3704	0.685	0.2966	0.7374	0.758	0.5067	0.6174	0.4359	0.4748	0.8209	0.5436	0.8716	0.8597	0.3188	0.5374	0.6453	0.5253	0.493	0.6604	0.6414	0.4596	0.645	0.3463	0.5285	0.5086	0.8327	0.3723	0.4098	0.6254	0.6108	0.4742	0.3631
cg05055652	0.02438	0.0383	0.0306	0.0234	0.0191	0.0194	0.0198	0.0364	0.0204	0.0194	0.019	0.0204	0.0242	0.0273	0.0269	0.0189	0.0241	0.0238	0.0215	0.0272	0.0207	0.0247	0.0262	0.033	0.02132	0.0236	0.0216	0.0201	0.1435	0.0206	0.0336	0.0181	0.0265	0.0395	0.0197	0.0229	0.0279	0.0171	0.0228	0.0276	0.0215	0.0308	0.03	0.0184	0.0197	0.0242	0.0205	0.0521	0.0353
cg20525183	0.0417	0.0329	0.0296	0.0214	0.0182	0.0147	0.0256	0.2196	0.0308	0.0305	0.0162	0.0236	0.031	0.0479	0.0242	0.0181	0.0212	0.0213	0.0248	0.0267	0.0358	0.0218	0.0221	0.0351	0.0375	0.023	0.027	0.0138	0.0319	0.061	0.0376	0.0238	0.0189	0.0463	0.0143	0.0229	0.0284	0.0236	0.0155	0.0415	0.021	0.0217	0.0269	0.02	0.021	0.0266	0.0232	0.0342	0.0371
cg24714106	0.2565	0.1235	0.0617	0.0945	0.0743	0.5274	0.0591	0.1123	0.0721	0.0601	0.0885	0.0527	0.0789	0.9365	0.0849	0.1185	0.1287	0.4189	0.089	0.0716	0.0406	0.0844	0.083	0.0899	0.2053	0.063	0.1007	0.1103	0.2072	0.0705	0.08	0.0445	0.0815	0.0928	0.3526	0.0648	0.0908	0.0742	0.1666	0.0663	0.9045	0.8523	0.1567	0.0839	0.0532	0.0502	0.0536	0.1703	0.1087
cg04125208	0.0806	0.0673	0.0746	0.0584	0.0636	0.1051	0.1109	0.0602	0.0939	0.1111	0.1071	0.0905	0.094	0.0789	0.0789	0.0861	0.078	0.143	0.0671	0.0679	0.0729	0.0687	0.0924	0.1439	0.0838	0.0872	0.0732	0.0796	0.0835	0.078	0.06	0.0992	0.1045	0.0588	0.0857	0.0731	0.0662	0.0872	0.0398	0.0853	0.0913	0.0875	0.1438	0.064	0.0946	0.0917	0.1219	0.076	0.0878
cg04522932	0.6363	0.6127	0.6596	0.6204	0.663	0.7125	0.6866	0.5851	0.6483	0.7299	0.5373	0.6833	0.6903	0.6136	0.6151	0.6281	0.5644	0.4464	0.6776	0.5001	0.7497	0.6475	0.711	0.6947	0.6663	0.6516	0.6947	0.6526	0.6869	0.6988	0.6775	0.7156	0.7294	0.6114	0.7049	0.7259	0.6805	0.6632	0.6192	0.6669	0.5504	0.6885	0.6914	0.6586	0.5813	0.6687	0.7184	0.5604	0.5489
cg05224385	0.0479	0.037	0.0433	0.0409	0.0353	0.0294	0.0454	0.0412	0.0407	0.0479	0.0511	0.0408	0.063	0.05	0.1849	0.0499	0.0319	0.0363	0.0476	0.0474	0.0419	0.0651	0.0467	0.1143	0.0361	0.0438	0.0456	0.0502	0.0711	0.0594	0.0535	0.0709	0.049	0.0477	0.0275	0.0428	0.0517	0.0419	0.0469	0.0456	0.1474	0.0755	0.0384	0.0295	0.0471	0.0467	0.0669	0.0422	0.0664
cg19019198	0.8707	0.8509	0.9413	0.9049	0.9151	0.9449	0.9438	0.8803	0.9371	0.9091	0.912	0.9239	0.9399	0.944	0.9143	0.8134	0.9335	0.917	0.9368	0.8878	0.9493	0.934	0.9424	0.9169	0.8724	0.9157	0.9324	0.9287	0.7821	0.9366	0.9468	0.9299	0.9143	0.9011	0.8132	0.9182	0.9274	0.9406	0.8647	0.9399	0.9365	0.8565	0.9337	0.9309	0.9297	0.9254	0.9312	0.8689	0.9252
cg07379574	0.3248	0.1338	0.3339	0.3337	0.0937	0.3444	0.3791	0.0801	0.7694	0.1185	0.1108	0.1627	0.1273	0.0536	0.0733	0.0751	0.5139	0.1139	0.2331	0.0476	0.4087	0.1385	0.2444	0.0805	0.63	0.0683	0.1346	0.1068	0.1155	0.0485	0.2482	0.1766	0.0817	0.0808	0.0455	0.134	0.0834	0.4051	0.105	0.0422	0.1397	0.2847	0.2811	0.046	0.25	0.198	0.1967	0.16	0.0894
cg25772438	0.0879	0.0732	0.1174	0.0674	0.068	0.0661	0.0862	0.052	0.0951	0.0939	0.1302	0.1116	0.0995	0.0513	0.0646	0.1066	0.0702	0.0779	0.1263	0.078	0.1154	0.1364	0.103	0.0741	0.07	0.1213	0.1197	0.094	0.1062	0.1099	0.0657	0.1176	0.0845	0.0673	0.0541	0.1049	0.2644	0.0925	0.0942	0.0635	0.0838	0.07	0.0613	0.0592	0.1084	0.1082	0.1022	0.0808	0.0619
cg26377880	0.9223	0.9006	0.7117	0.8138	0.9275	0.6735	0.9216	0.7588	0.9187	0.8204	0.9461	0.9084	0.9028	0.9258	0.9181	0.897	0.9375	0.9365	0.8991	0.9268	0.7909	0.9104	0.9064	0.8953	0.9444	0.8743	0.8442	0.855	0.7732	0.9119	0.9326	0.9106	0.8711	0.9333	0.8114	0.8878	0.871	0.942	0.8184	0.8991	0.9574	0.9239	0.9225	0.8918	0.8739	0.936	0.8793	0.9215	0.936
cg22762309	0.7343	0.7518	0.8375	0.5265	0.4626	0.9233	0.6922	0.3635	0.8869	0.8439	0.6657	0.7353	0.4871	0.3124	0.0747	0.5504	0.9423	0.2463	0.7875	0.245	0.9469	0.8498	0.782	0.8219	0.4754	0.5533	0.8247	0.8519	0.8819	0.8469	0.8103	0.779	0.5592	0.7383	0.7011	0.8582	0.761	0.8512	0.6484	0.7631	0.714	0.6126	0.5836	0.6914	0.799	0.8513	0.8472	0.6935	0.4041
cg00912625	0.6741	0.41	0.5747	0.6698	0.4482	0.6398	0.1699	0.2616	0.2062	0.5161	0.1851	0.7259	0.053	0.0792	0.0527	0.1497	0.4957	0.0458	0.1941	0.0872	0.4276	0.0967	0.6973	0.5311	0.5827	0.3972	0.3794	0.2861	0.1209	0.7091	0.8029	0.4468	0.0823	0.1191	0.0303	0.4353	0.3395	0.5021	0.3128	0.4023	0.0618	0.0385	0.7024	0.4594	0.1954	0.5647	0.4083	0.4842	0.5161
cg18953104	0.1988	0.2129	0.1195	0.0987	0.1127	0.1083	0.2148	0.1559	0.1688	0.5069	0.6914	0.0885	0.1956	0.8201	0.2165	0.2518	0.3762	0.6633	0.0924	0.1335	0.1104	0.1547	0.1309	0.2353	0.0652	0.0701	0.0762	0.2324	0.1396	0.0693	0.1843	0.1542	0.1813	0.2666	0.575	0.1104	0.0881	0.1967	0.1443	0.6485	0.8891	0.8521	0.1643	0.2032	0.4295	0.4389	0.1926	0.4608	0.4775
cg20557935	0.8387	0.9082	0.8762	0.8596	0.916	0.9118	0.8822	0.894	0.87	0.8965	0.9055	0.8338	0.8661	0.8981	0.8651	0.8713	0.9017	0.883	0.8746	0.8955	0.9081	0.866	0.8503	0.848	0.8979	0.8493	0.876	0.894	0.9058	0.8951	0.8887	0.8984	0.9274	0.9064	0.9003	0.8628	0.8675	0.8786	0.9076	0.8674	0.8908	0.8699	0.8885	0.8871	0.8424	0.9137	0.9015	0.8872	0.8969
cg15114672	0.0471	0.069	0.0514	0.0587	0.0496	0.0533	0.055	0.1026	0.0664	0.0654	0.0494	0.0419	0.0791	0.0546	0.0672	0.0756	0.1764	0.0628	0.0495	0.0723	0.0534	0.1065	0.0457	0.076	0.0231	0.0438	0.0873	0.1119	0.0897	0.0489	0.0646	0.0886	0.1358	0.1006	0.0658	0.0702	0.0712	0.064	0.0732	0.0475	0.0743	0.0526	0.078	0.0535	0.0735	0.0582	0.0819	0.1315	0.0733
cg05432003	0.712	0.8144	0.9045	0.7113	0.8401	0.8445	0.8477	0.7541	0.8412	0.8451	0.8793	0.8744	0.7273	0.3223	0.8674	0.8134	0.8393	0.8399	0.8705	0.8845	0.9034	0.5375	0.9091	0.8601	0.7406	0.6893	0.8304	0.8025	0.7561	0.8949	0.8958	0.8736	0.8715	0.8063	0.7473	0.8558	0.8181	0.82	0.7478	0.8685	0.4973	0.5403	0.8272	0.8251	0.7548	0.9041	0.8926	0.7742	0.672
cg16508199	0.076	0.0193	0.0217	0.0154	0.0154	0.3816	0.0185	0.0294	0.0205	0.0173	0.0161	0.0229	0.0364	0.5468	0.0186	0.0249	0.0494	0.0207	0.0283	0.0296	0.0219	0.0263	0.0209	0.0617	0.0475	0.0235	0.0177	0.0143	0.0258	0.0267	0.0515	0.0245	0.0331	0.0363	0.02	0.0173	0.0268	0.1035	0.024	0.0366	0.5783	0.34	0.0289	0.0156	0.0212	0.0302	0.0399	0.0308	0.0237
cg14682419	0.9198	0.8869	0.9265	0.926	0.9329	0.9256	0.9226	0.8006	0.907	0.9048	0.6562	0.9115	0.9436	0.3644	0.925	0.8754	0.9371	0.9157	0.9176	0.923	0.9335	0.914	0.8976	0.9397	0.7436	0.8944	0.8998	0.9329	0.9317	0.9395	0.9258	0.9374	0.9084	0.9136	0.9479	0.9233	0.913	0.9494	0.8808	0.9129	0.81	0.8949	0.9344	0.8854	0.9094	0.8977	0.9047	0.9105	0.8078
cg25613641	0.0438	0.0514	0.0879	0.0454	0.043	0.0421	0.1217	0.1569	0.0374	0.1271	0.086	0.043	0.1148	0.4763	0.041	0.0539	0.0943	0.0595	0.0817	0.0632	0.1299	0.0755	0.1029	0.0735	0.063	0.0822	0.0585	0.0462	0.0668	0.0727	0.0489	0.1198	0.0955	0.0714	0.0769	0.1056	0.0562	0.061	0.1039	0.0749	0.679	0.2588	0.0612	0.0626	0.1345	0.0856	0.084	0.0445	0.0871
cg16004008	0.2191	0.1802	0.1741	0.1442	0.1744	0.1207	0.1287	0.0928	0.1594	0.1935	0.1503	0.0922	0.1983	0.4404	0.1343	0.1551	0.2153	0.3148	0.0758	0.1337	0.2161	0.1575	0.1223	0.1595	0.1436	0.089	0.1196	0.171	0.1231	0.2141	0.1446	0.1189	0.218	0.1707	0.1995	0.1893	0.1373	0.1526	0.1797	0.1403	0.22	0.6656	0.2066	0.1182	0.1237	0.1444	0.2783	0.1493	0.1556
cg02491754	0.1892	0.228	0.1518	0.1558	0.1575	0.1277	0.1608	0.1868	0.2752	0.121	0.1952	0.1304	0.1354	0.173	0.1659	0.2747	0.2021	0.1422	0.0951	0.0983	0.1101	0.2293	0.1221	0.3571	0.1627	0.1016	0.1384	0.1732	0.218	0.1171	0.1399	0.1141	0.1256	0.15	0.109	0.1387	0.3803	0.1403	0.2866	0.1221	0.1351	0.2143	0.1385	0.104	0.1187	0.1596	0.1229	0.2746	0.2032
cg21808287	0.8881	0.9252	0.9277	0.88	0.7255	0.885	0.9451	0.3081	0.8916	0.8183	0.7837	0.8952	0.2474	0.4937	0.8919	0.7843	0.8973	0.3343	0.8072	0.1802	0.9485	0.9242	0.717	0.9194	0.8226	0.6727	0.8812	0.4826	0.8781	0.933	0.8095	0.9341	0.702	0.9154	0.5337	0.925	0.8888	0.9316	0.8657	0.7748	0.9188	0.7345	0.9083	0.2479	0.6061	0.8752	0.7785	0.872	0.3115
cg06481786	0.1422	0.0508	0.0709	0.0336	0.0798	0.3407	0.1912	0.0464	0.034	0.1311	0.037	0.0551	0.0631	0.4883	0.0621	0.0449	0.2606	0.2186	0.0333	0.0382	0.0587	0.039	0.059	0.2538	0.2492	0.0612	0.064	0.1134	0.0652	0.0636	0.1076	0.0831	0.0716	0.0435	0.0764	0.0666	0.134	0.0839	0.0378	0.0585	0.3166	0.4944	0.0664	0.0379	0.0861	0.0698	0.1797	0.4611	0.0511
cg17085352	0.0258	0.1456	0.2372	0.0423	0.0329	0.4324	0.046	0.0874	0.0215	0.2424	0.0263	0.0801	0.0307	0.0249	0.0879	0.0526	0.0168	0.0215	0.0402	0.03	0.2151	0.042	0.0373	0.0531	0.0206	0.0349	0.0525	0.3483	0.1655	0.0242	0.4672	0.3538	0.0797	0.0288	0.0273	0.105	0.2589	0.0738	0.0987	0.0217	0.0764	0.0361	0.0645	0.3479	0.0441	0.4059	0.0836	0.0715	0.2309
cg08675664	0.0839	0.0591	0.0907	0.0453	0.1099	0.0495	0.0595	0.051	0.0584	0.0721	0.0704	0.0508	0.259	0.818	0.1004	0.0631	0.0537	0.0532	0.0725	0.0578	0.0703	0.0851	0.0671	0.045	0.0943	0.0623	0.0584	0.0533	0.06	0.0424	0.1673	0.0681	0.0691	0.0536	0.0648	0.0615	0.0641	0.0531	0.0711	0.0517	0.6847	0.4479	0.0506	0.0492	0.0661	0.0652	0.066	0.0546	0.0431
cg14148265	0.5664	0.1867	0.1281	0.1841	0.1904	0.1404	0.0984	0.5069	0.186	0.4648	0.6655	0.0804	0.3993	0.5737	0.2247	0.2662	0.123	0.865	0.1839	0.8508	0.4087	0.3837	0.3814	0.2474	0.0906	0.1774	0.2183	0.5303	0.1949	0.0928	0.0888	0.2146	0.4028	0.1436	0.5297	0.1585	0.4132	0.3327	0.4196	0.5513	0.9062	0.6611	0.1394	0.3493	0.1598	0.4054	0.2758	0.5574	0.3995
cg13891121	0.2756	0.2882	0.2467	0.1588	0.4421	0.7526	0.617	0.0967	0.134	0.4378	0.748	0.168	0.5507	0.9196	0.578	0.0442	0.674	0.43	0.1031	0.3853	0.07	0.1725	0.2671	0.6697	0.4319	0.261	0.1583	0.4214	0.2127	0.6691	0.7773	0.1471	0.2973	0.0588	0.2075	0.3393	0.2072	0.1946	0.2883	0.4826	0.8147	0.8134	0.3658	0.054	0.2693	0.5032	0.4593	0.7486	0.3986
cg00428601	0.0764	0.074	0.0667	0.0643	0.0912	0.0736	0.0649	0.0658	0.0999	0.091	0.0957	0.0647	0.1019	0.8925	0.0671	0.2491	0.1015	0.0645	0.0624	0.0711	0.0752	0.1438	0.1857	0.1077	0.0943	0.285	0.0627	0.1932	0.1088	0.0872	0.103	0.0761	0.0938	0.1	0.4206	0.0585	0.0956	0.1733	0.0763	0.0727	0.8384	0.7951	0.1396	0.0846	0.0666	0.088	0.1043	0.1359	0.1175
cg23378989	0.0268	0.0236	0.0231	0.0205	0.0231	0.0181	0.0222	0.0315	0.0248	0.0244	0.0248	0.0235	0.0244	0.0835	0.0229	0.0263	0.018	0.0184	0.026	0.0263	0.0245	0.0386	0.0269	0.0693	0.0517	0.028	0.027	0.0204	0.0265	0.0293	0.0338	0.0226	0.0222	0.0314	0.0168	0.0216	0.0329	0.0272	0.0241	0.0319	0.3448	0.0202	0.0321	0.0204	0.0271	0.0261	0.0205	0.0708	0.0359
cg06162746	0.141	0.2163	0.0636	0.124	0.1086	0.0811	0.0667	0.1943	0.1974	0.064	0.147	0.0651	0.0953	0.1322	0.1237	0.21	0.1819	0.078	0.0629	0.1181	0.0577	0.1181	0.0506	0.2405	0.1946	0.0675	0.0693	0.1067	0.168	0.1047	0.093	0.061	0.0535	0.1481	0.0548	0.0647	0.1343	0.1453	0.122	0.1164	0.0553	0.1316	0.1039	0.1035	0.0652	0.0694	0.0461	0.367	0.1321
cg23676439	0.0432	0.0415	0.0448	0.0279	0.0326	0.0894	0.05	0.0509	0.0798	0.0639	0.0362	0.0478	0.0409	0.3725	0.0454	0.055	0.0462	0.0431	0.049	0.0311	0.0628	0.081	0.0653	0.0329	0.027	0.0366	0.0466	0.0368	0.0367	0.0649	0.0482	0.0676	0.0609	0.0333	0.0535	0.0899	0.0361	0.033	0.0394	0.0412	0.6385	0.6996	0.0419	0.0355	0.0665	0.068	0.0538	0.0601	0.0628
cg07291439	0.1267	0.2236	0.0913	0.1416	0.1501	0.1024	0.1011	0.2676	0.1741	0.1375	0.1802	0.0878	0.1487	0.6012	0.1278	0.237	0.0948	0.1321	0.0916	0.2752	0.1332	0.2915	0.0898	0.2645	0.13719	0.096	0.0974	0.151	0.2344	0.1652	0.2534	0.1599	0.1596	0.2728	0.1243	0.1191	0.3372	0.2398	0.1537	0.1133	0.8515	0.6606	0.2062	0.0925	0.1271	0.1451	0.1323	0.3426	0.3216
cg22919370	0.0358	0.103	0.0335	0.0326	0.0273	0.0441	0.0541	0.0318	0.0388	0.0619	0.0338	0.0272	0.5027	0.0369	0.0269	0.0616	0.0403	0.0283	0.0545	0.0481	0.0278	0.0765	0.0475	0.0863	0.0386	0.0271	0.0329	0.0573	0.0595	0.0451	0.0893	0.0468	0.0746	0.0627	0.0389	0.0421	0.0496	0.047	0.0284	0.0428	0.5591	0.322	0.0512	0.0303	0.0571	0.043	0.0515	0.0407	0.0745
cg08261032	0.0258	0.086	0.0607	0.0667	0.0429	0.0388	0.0574	0.0887	0.0504	0.0753	0.022	0.0304	0.104	0.0927	0.0654	0.0396	0.0453	0.0562	0.0461	0.1046	0.0747	0.057	0.0739	0.0968	0.0571	0.0397	0.0481	0.0346	0.0181	0.0978	0.0903	0.0754	0.0643	0.149	0.0281	0.0589	0.0919	0.0774	0.033	0.1013	0.0416	0.0266	0.0889	0.0611	0.0611	0.0733	0.0625	0.1256	0.1217
cg01367393	0.039	0.0377	0.0307	0.023	0.0232	0.0277	0.0259	0.0374	0.0297	0.0283	0.0573	0.0325	0.0263	0.9507	0.0318	0.036	0.8526	0.0218	0.0266	0.0358	0.0225	0.0351	0.0231	0.0431	0.0872	0.0312	0.0328	0.0215	0.0286	0.0337	0.0558	0.0282	0.0295	0.0357	0.0277	0.0205	0.0337	0.0309	0.0317	0.0328	0.7565	0.3534	0.0341	0.024	0.0249	0.0232	0.0233	0.0393	0.0469
cg11101109	0.078	0.0482	0.0497	0.0592	0.0405	0.0914	0.3393	0.0479	0.0349	0.1361	0.0356	0.0487	0.1886	0.8794	0.0795	0.061	0.2012	0.0486	0.036	0.1886	0.0569	0.0367	0.0613	0.0514	0.0412	0.3621	0.0361	0.0518	0.1309	0.0579	0.0388	0.0982	0.1257	0.0458	0.4457	0.042	0.0336	0.0406	0.0849	0.0344	0.5978	0.6714	0.0447	0.0377	0.0779	0.0656	0.3512	0.3772	0.0345
cg00688539	0.1479	0.07	0.1131	0.0784	0.0753	0.075	0.1166	0.1188	0.09	0.126	0.1183	0.0853	0.2313	0.8703	0.0929	0.0509	0.2151	0.0871	0.1292	0.1084	0.1116	0.0781	0.137	0.1233	0.0954	0.1114	0.1585	0.0813	0.0534	0.1054	0.1217	0.11	0.1074	0.0944	0.0798	0.126	0.0704	0.0646	0.0523	0.11	0.4864	0.291	0.1035	0.1137	0.0989	0.1525	0.1054	0.131	0.1401
cg13315770	0.16165	0.1577	0.0956	0.3509	0.3036	0.2917	0.0859	0.4317	0.3265	0.0759	0.4875	0.2156	0.27465	0.2751	0.1323	0.17195	0.7283	0.2925	0.2172	0.2311	0.0628	0.3427	0.0853	0.352	0.15235	0.1098	0.1556	0.3135	0.26704	0.3353	0.3321	0.0894	0.07	0.4026	0.2896	0.0713	0.3093	0.3942	0.2677	0.2943	0.0958	0.1824	0.4627	0.2531	0.0921	0.1034	0.096	0.5184	0.2858
cg12317811	0.0871	0.0656	0.0434	0.0434	0.0568	0.0449	0.0385	0.133	0.0567	0.0394	0.0625	0.0417	0.057	0.0545	0.0472	0.0771	0.0362	0.0484	0.0419	0.0486	0.0432	0.0624	0.0445	0.0562	0.0411	0.03	0.0373	0.0742	0.0452	0.0491	0.0532	0.0347	0.0386	0.0585	0.055	0.0532	0.0534	0.0485	0.0497	0.0415	0.0441	0.0577	0.067	0.0534	0.0451	0.046	0.0433	0.0908	0.0681
cg25677394	0.331	0.3935	0.4057	0.2557	0.2715	0.278	0.2793	0.2466	0.1369	0.4421	0.5006	0.2351	0.2885	0.8303	0.1395	0.402	0.2862	0.2391	0.3361	0.3535	0.3439	0.4281	0.3491	0.3466	0.2091	0.3806	0.3918	0.4582	0.5392	0.328	0.1464	0.3768	0.4918	0.3091	0.4555	0.3732	0.4933	0.2725	0.4865	0.3339	0.9109	0.7347	0.2617	0.4452	0.3343	0.253	0.4612	0.5256	0.4787
cg15427941	0.0671	0.0693	0.0519	0.0517	0.0863	0.0625	0.0443	0.1016	0.1478	0.0486	0.0922	0.0457	0.1398	0.0712	0.0628	0.0914	0.1001	0.063	0.0565	0.1157	0.0391	0.0785	0.0418	0.0718	0.0571	0.0411	0.0406	0.0775	0.0674	0.0482	0.0599	0.0542	0.0466	0.1109	0.0565	0.068	0.0754	0.0583	0.0472	0.057	0.0642	0.0617	0.083	0.1217	0.0517	0.0567	0.0418	0.0804	0.1271
cg01934626	0.7292	0.4343	0.0148	0.0121	0.0114	0.0108	0.0122	0.0166	0.0137	0.0421	0.0109	0.0317	0.015	0.9077	0.0131	0.0143	0.0343	0.0119	0.015	0.0104	0.0238	0.0176	0.0134	0.031	0.0212	0.0148	0.0306	0.0125	0.0182	0.0145	0.0114	0.0192	0.0313	0.1418	0.0114	0.0568	0.0626	0.032	0.037	0.0168	0.7741	0.7363	0.0127	0.0143	0.0229	0.0195	0.0142	0.0204	0.0131
cg00096039	0.7723	0.7254	0.9555	0.9017	0.911	0.9281	0.9508	0.546	0.8669	0.9508	0.9402	0.9417	0.8932	0.9182	0.872	0.8263	0.8647	0.8807	0.9449	0.7639	0.9583	0.9189	0.7622	0.9067	0.6349	0.9272	0.9399	0.9222	0.9109	0.9427	0.9107	0.9474	0.9244	0.8895	0.8563	0.9577	0.8876	0.9111	0.8942	0.9296	0.947	0.9249	0.9108	0.9036	0.9493	0.9458	0.9541	0.6147	0.8997
cg18898992	0.6977	0.5649	0.4215	0.5915	0.4848	0.5833	0.5694	0.7538	0.463	0.4744	0.463	0.3805	0.4359	0.6086	0.4211	0.4734	0.9392	0.5395	0.477	0.5604	0.5751	0.6381	0.655	0.6618	0.0721	0.5301	0.5659	0.5414	0.4127	0.7343	0.4218	0.4363	0.5651	0.7091	0.5661	0.4468	0.6216	0.5546	0.5594	0.52	0.518	0.485	0.7216	0.6019	0.4178	0.4167	0.579	0.4997	0.5214
cg13527630	0.0206	0.0182	0.0163	0.0119	0.0125	0.0111	0.0164	0.0184	0.0118	0.0148	0.0126	0.0165	0.0137	0.0162	0.0155	0.0144	0.0144	0.011	0.0155	0.0131	0.0154	0.0151	0.0145	0.0141	0.0202	0.0161	0.0157	0.0119	0.0131	0.0143	0.0144	0.0152	0.0147	0.0137	0.0155	0.0148	0.0144	0.0134	0.0123	0.0134	0.0957	0.0229	0.0142	0.0105	0.0162	0.0165	0.0174	0.0194	0.0138
cg24986868	0.2763	0.1982	0.1577	0.1025	0.0959	0.2426	0.1279	0.1363	0.1364	0.5293	0.1259	0.0766	0.1276	0.4507	0.1298	0.2934	0.1683	0.1291	0.1362	0.1135	0.1923	0.1457	0.109	0.489	0.029	0.1842	0.2621	0.2237	0.2695	0.1401	0.08	0.1948	0.1685	0.1216	0.109	0.2311	0.0949	0.1144	0.2058	0.0886	0.8324	0.5242	0.231	0.105	0.1808	0.2648	0.2437	0.2138	0.1151
cg26163852	0.2117	0.0922	0.08	0.0879	0.3453	0.106	0.1128	0.1749	0.1365	0.0799	0.0645	0.1039	0.0864	0.2259	0.0905	0.2043	0.0611	0.4403	0.0915	0.1862	0.082	0.0713	0.0952	0.3434	0.1709	0.0912	0.1068	0.0931	0.0946	0.1002	0.0867	0.0889	0.0942	0.0773	0.1458	0.0704	0.0972	0.1214	0.078	0.101	0.8941	0.8031	0.5007	0.0661	0.1032	0.1326	0.0754	0.0812	0.0824
cg14845962	0.1405	0.3719	0.0737	0.0462	0.3998	0.031	0.0889	0.0424	0.0361	0.0533	0.0856	0.0526	0.0515	0.9783	0.027	0.2633	0.4847	0.0206	0.2859	0.0484	0.1753	0.3455	0.0876	0.2772	0.0799	0.1831	0.2896	0.0916	0.5742	0.2884	0.0999	0.1723	0.1635	0.0764	0.0785	0.1483	0.2267	0.063	0.365	0.1206	0.9131	0.8696	0.0841	0.0649	0.0321	0.0499	0.4267	0.6412	0.0621
cg02768101	0.0428	0.0353	0.0411	0.0703	0.0339	0.4081	0.0357	0.4696	0.0355	0.055	0.364	0.092	0.0597	0.6317	0.0874	0.0467	0.0316	0.028	0.041	0.0849	0.0367	0.0727	0.0524	0.3619	0.0333	0.0451	0.0401	0.2543	0.0236	0.0619	0.0507	0.0429	0.0362	0.0682	0.0278	0.0601	0.359	0.0773	0.0291	0.0633	0.0572	0.0268	0.1017	0.0342	0.0624	0.0454	0.0367	0.0875	0.0763
cg06898289	0.0555	0.0502	0.0979	0.0431	0.0441	0.0523	0.058	0.0458	0.0463	0.0625	0.0459	0.0536	0.0387	0.0355	0.0563	0.0409	0.0592	0.0356	0.0544	0.0291	0.053	0.052	0.0613	0.0439	0.0418	0.0509	0.0555	0.0355	0.0204	0.042	0.0403	0.066	0.0594	0.0357	0.0377	0.0592	0.0406	0.0451	0.037	0.0447	0.0498	0.0334	0.0432	0.0367	0.0625	0.0507	0.066	0.041	0.0475
cg09146903	0.0913	0.1261	0.1323	0.0524	0.081	0.4645	0.1455	0.148	0.1042	0.2487	0.1137	0.0967	0.1455	0.3723	0.1218	0.0818	0.1109	0.0907	0.1498	0.2411	0.1189	0.1017	0.159	0.194	0.2499	0.1212	0.1223	0.0841	0.0823	0.1074	0.2037	0.1559	0.1387	0.0808	0.2649	0.1147	0.1109	0.3102	0.0876	0.097	0.5299	0.1021	0.1415	0.0732	0.1278	0.2015	0.1382	0.1147	0.1423
cg26412379	0.4772	0.4958	0.7266	0.217	0.2021	0.7908	0.5721	0.1793	0.0867	0.3454	0.2556	0.4645	0.2749	0.4321	0.3755	0.2297	0.5871	0.2026	0.3435	0.1108	0.7642	0.3029	0.2374	0.587	0.5763	0.3819	0.5664	0.4199	0.4418	0.5197	0.4769	0.3196	0.3145	0.5594	0.1549	0.3227	0.3739	0.293	0.516	0.113	0.3942	0.1093	0.3881	0.2053	0.179	0.4724	0.6834	0.3431	0.3006
cg26651122	0.3809	0.3575	0.435	0.433	0.4469	0.3336	0.4684	0.4357	0.4197	0.5007	0.4814	0.4465	0.505	0.7344	0.4188	0.424	0.7671	0.6406	0.3945	0.4819	0.4254	0.2937	0.5307	0.569	0.4279	0.4415	0.3833	0.4866	0.2919	0.4487	0.653	0.4638	0.4642	0.4881	0.5613	0.3337	0.3266	0.4152	0.397	0.4471	0.7489	0.6649	0.3785	0.5064	0.4214	0.4775	0.4833	0.5186	0.5456
cg19241468	0.082	0.0586	0.092	0.0622	0.0693	0.0727	0.083	0.0664	0.09	0.1977	0.3368	0.0581	0.1575	0.2857	0.0736	0.1527	0.4095	0.0616	0.0628	0.089	0.0819	0.1009	0.1068	0.1905	0.053	0.0696	0.063	0.1148	0.0537	0.0508	0.0583	0.1491	0.2097	0.058	0.3911	0.0899	0.0545	0.0635	0.0624	0.0958	0.7425	0.699	0.1021	0.0666	0.113	0.0646	0.1203	0.1975	0.0835
cg01600100	0.057	0.0454	0.0301	0.0159	0.0188	0.0175	0.0284	0.0522	0.0215	0.0226	0.0163	0.0231	0.0294	0.0257	0.0248	0.0199	0.0203	0.018	0.0219	0.0338	0.0334	0.0203	0.022	0.0358	0.0436	0.0231	0.028	0.0167	0.0196	0.0315	0.0357	0.0203	0.0322	0.0336	0.0146	0.0295	0.0301	0.0229	0.0216	0.0236	0.0271	0.0207	0.0224	0.0194	0.0251	0.044	0.0222	0.0402	0.028
cg22250498	0.0236	0.0406	0.0323	0.0188	0.0211	0.0197	0.024	0.0261	0.024	0.0266	0.0198	0.0255	0.0455	0.0308	0.0253	0.0328	0.028	0.0187	0.0242	0.0286	0.024	0.0349	0.0249	0.0336	0.0206	0.0214	0.0267	0.0213	0.0202	0.0322	0.0267	0.0262	0.0244	0.0348	0.0203	0.0217	0.0474	0.0266	0.14	0.0256	0.0259	0.0212	0.0316	0.0176	0.0233	0.0253	0.0221	0.0388	0.0286
cg09877947	0.5259	0.4268	0.0294	0.2924	0.7244	0.2569	0.8033	0.0703	0.0197	0.0387	0.0169	0.5228	0.8516	0.9635	0.4846	0.0242	0.0219	0.9502	0.0475	0.5105	0.0258	0.0278	0.0445	0.4718	0.5195	0.4903	0.0301	0.0255	0.0332	0.4154	0.0295	0.3494	0.3608	0.0215	0.5576	0.0333	0.0255	0.0238	0.0256	0.5446	0.7524	0.8009	0.6158	0.1697	0.4028	0.0304	0.3048	0.3373	0.4128
cg09821032	0.1547	0.3062	0.1061	0.0452	0.3557	0.0953	0.669	0.084	0.0696	0.0813	0.3776	0.147	0.0951	0.16	0.1638	0.0824	0.0586	0.0873	0.0377	0.283	0.0753	0.1559	0.1221	0.1821	0.0962	0.0774	0.0976	0.1556	0.0626	0.0682	0.1166	0.0774	0.1117	0.2371	0.1938	0.0874	0.1439	0.1623	0.1218	0.1241	0.4825	0.2541	0.1856	0.0691	0.0721	0.1557	0.1429	0.1591	0.1417
cg23345097	0.3699	0.0221	0.023	0.0136	0.0159	0.0134	0.0218	0.2058	0.0183	0.0225	0.0386	0.0199	0.0161	0.8535	0.0228	0.0189	0.0272	0.0154	0.016	0.0183	0.0195	0.0204	0.0221	0.0181	0.0205	0.0182	0.0196	0.0158	0.0158	0.0167	0.6076	0.0226	0.0172	0.0185	0.0152	0.0186	0.0189	0.0139	0.0148	0.0188	0.7949	0.3565	0.1217	0.0109	0.0204	0.0248	0.0193	0.029	0.025
cg00568741	0.0634	0.0402	0.0568	0.0491	0.0316	0.0401	0.0435	0.0479	0.0422	0.049	0.0329	0.0474	0.0299	0.031	0.046	0.0374	0.0408	0.0387	0.0477	0.0288	0.0561	0.041	0.044	0.0243	0.0373	0.0376	0.0409	0.0418	0.0336	0.0406	0.0513	0.0543	0.0421	0.0334	0.0402	0.0661	0.0314	0.0387	0.037	0.0452	0.0363	0.0398	0.0349	0.0439	0.0538	0.0557	0.0584	0.0453	0.0368
cg08904394	0.4628	0.7419	0.7793	0.5376	0.5628	0.5074	0.5618	0.3609	0.5239	0.5465	0.5749	0.5639	0.8638	0.6144	0.4722	0.579	0.3413	0.32	0.6933	0.5836	0.9185	0.8403	0.5557	0.7648	0.9051	0.7246	0.7201	0.5596	0.5044	0.3829	0.5411	0.6154	0.6506	0.479	0.6598	0.5181	0.5802	0.6113	0.6199	0.3226	0.9139	0.8028	0.4338	0.6269	0.5118	0.6237	0.432	0.654	0.5237
cg11392885	0.0138	0.0165	0.0184	0.012	0.0141	0.0137	0.0216	0.0195	0.0125	0.0182	0.016	0.0182	0.0168	0.0136	0.0174	0.0217	0.0216	0.0149	0.014	0.0149	0.0174	0.0141	0.0182	0.0138	0.0131	0.0187	0.0137	0.0282	0.0128	0.0142	0.0141	0.0158	0.0225	0.0162	0.0165	0.0149	0.0141	0.0143	0.0135	0.0161	0.2419	0.0166	0.0123	0.0124	0.0171	0.0192	0.0145	0.0261	0.0162
cg17891251	0.902	0.8865	0.9183	0.9186	0.9361	0.8929	0.8444	0.8566	0.9376	0.8669	0.7977	0.9199	0.9154	0.1877	0.9204	0.872	0.9234	0.8651	0.8879	0.9358	0.936	0.8705	0.916	0.9306	0.6741	0.8829	0.8341	0.9097	0.9148	0.9173	0.9191	0.9148	0.9242	0.9323	0.9445	0.8861	0.9291	0.9314	0.8448	0.8688	0.6806	0.7303	0.9071	0.874	0.9528	0.9372	0.8188	0.7827	0.7783
cg18530748	0.5062	0.0879	0.1357	0.4862	0.1999	0.4888	0.0959	0.5472	0.0966	0.4352	0.2075	0.0676	0.2165	0.5231	0.0631	0.3591	0.5321	0.0828	0.0974	0.0578	0.5095	0.5878	0.5879	0.3295	0.1015	0.3952	0.0581	0.5245	0.3982	0.176	0.1926	0.0828	0.4712	0.5325	0.1509	0.2214	0.3931	0.2057	0.3257	0.4541	0.6332	0.6809	0.1155	0.2596	0.0657	0.5051	0.2509	0.0931	0.6923
cg17910613	0.0531	0.1274	0.109	0.0553	0.1243	0.0654	0.144	0.1707	0.0677	0.1224	0.0601	0.0711	0.0809	0.0708	0.1386	0.0372	0.081	0.0546	0.1265	0.1047	0.1445	0.0703	0.1586	0.0735	0.1324	0.1068	0.1124	0.0592	0.0827	0.0581	0.0836	0.1453	0.1338	0.0816	0.0545	0.1174	0.0712	0.0471	0.056	0.0736	0.8438	0.3276	0.0889	0.0665	0.1256	0.1356	0.0995	0.1493	0.0973
cg26993251	0.0615	0.1171	0.0656	0.029	0.0815	0.0348	0.2556	0.0367	0.0217	0.2309	0.0341	0.0716	0.0802	0.0265	0.2327	0.0284	0.0458	0.1319	0.0461	0.0958	0.2004	0.0318	0.0756	0.1085	0.0704	0.0656	0.0381	0.1079	0.0355	0.0467	0.0444	0.0742	0.1679	0.0311	0.2291	0.0446	0.0292	0.0464	0.0462	0.1199	0.8167	0.1878	0.1139	0.0224	0.0727	0.1506	0.1824	0.257	0.0542
cg00503704	0.0452	0.0293	0.0275	0.017	0.02	0.0212	0.0372	0.0274	0.0273	0.0355	0.0951	0.0353	0.0688	0.0309	0.0254	0.0378	0.3484	0.0713	0.0362	0.0383	0.0323	0.0236	0.0462	0.0327	0.0286	0.0266	0.034	0.02	0.0146	0.018	0.0391	0.0453	0.0441	0.0301	0.0262	0.0344	0.0234	0.0381	0.0198	0.0378	0.4551	0.0197	0.0389	0.0164	0.0417	0.0395	0.0401	0.0271	0.0372
cg03327307	0.0711	0.0377	0.0736	0.0369	0.0456	0.0483	0.0645	0.0399	0.0538	0.0878	0.1376	0.0308	0.1029	0.6835	0.043	0.0327	0.1965	0.1009	0.0383	0.0419	0.0638	0.0775	0.1227	0.0478	0.0457	0.0511	0.0718	0.0627	0.0309	0.0287	0.0427	0.0673	0.1371	0.041	0.114	0.053	0.0269	0.0258	0.0411	0.0952	0.6057	0.4028	0.1568	0.0254	0.0765	0.0824	0.0514	0.0997	0.0954
cg06242719	0.6774	0.6979	0.7484	0.5003	0.528	0.6873	0.5288	0.3088	0.7644	0.5233	0.4223	0.3486	0.3937	0.2893	0.5886	0.5398	0.7206	0.6233	0.6287	0.3188	0.78	0.6922	0.546	0.7034	0.4534	0.5546	0.6311	0.477	0.7578	0.3094	0.4668	0.5628	0.5054	0.6993	0.4837	0.742	0.5597	0.7632	0.5452	0.4216	0.6825	0.3537	0.7626	0.3346	0.5376	0.6	0.6797	0.3305	0.5405
cg02190873	0.0651	0.0446	0.0487	0.0422	0.0529	0.0413	0.0536	0.0539	0.0487	0.0594	0.0447	0.0405	0.0632	0.0753	0.0358	0.0698	0.0535	0.056	0.0517	0.0533	0.0474	0.0746	0.0627	0.0434	0.0823	0.0418	0.0465	0.0526	0.0438	0.041	0.0482	0.0411	0.0469	0.0625	0.0457	0.0509	0.052	0.039	0.0666	0.0472	0.0764	0.0581	0.0535	0.0441	0.0542	0.0588	0.0553	0.0516	0.0403
cg25006231	0.201	0.1326	0.1942	0.1134	0.1392	0.1289	0.1614	0.1818	0.1131	0.1915	0.5319	0.1489	0.2626	0.4127	0.137	0.246	0.1263	0.774	0.123	0.6541	0.1867	0.1343	0.2762	0.3152	0.286	0.1357	0.1587	0.1696	0.1564	0.1637	0.3287	0.1896	0.2645	0.1523	0.4453	0.2423	0.1911	0.1366	0.1561	0.2909	0.7063	0.5331	0.1631	0.1033	0.1962	0.2463	0.2794	0.21	0.1247
cg26544685	0.024	0.0383	0.0403	0.0418	0.0261	0.0385	0.047	0.0535	0.0419	0.0505	0.0388	0.0318	0.0421	0.0632	0.0514	0.0386	0.0376	0.036	0.0382	0.0346	0.0359	0.0457	0.0492	0.038	0.033	0.0289	0.0321	0.0298	0.0283	0.0328	0.0466	0.045	0.0539	0.0403	0.0309	0.0383	0.0461	0.0369	0.0256	0.047	0.0685	0.0338	0.0556	0.0353	0.0508	0.0453	0.059	0.0497	0.0417
cg00565075	0.2079	0.3272	0.1536	0.3687	0.0725	0.0997	0.3705	0.0882	0.0516	0.3627	0.0985	0.0769	0.3461	0.0742	0.0979	0.0579	0.7898	0.1102	0.1213	0.0756	0.1101	0.0798	0.1946	0.1798	0.1261	0.1075	0.1026	0.1792	0.0798	0.0775	0.0478	0.1226	0.228	0.3887	0.2828	0.1462	0.0991	0.0729	0.1534	0.1042	0.1526	0.3094	0.085	0.3529	0.3352	0.1222	0.1551	0.0879	0.0715
cg10604040	0.7518	0.7692	0.8409	0.4674	0.531	0.7744	0.5183	0.4864	0.4965	0.6312	0.5291	0.7377	0.5441	0.394	0.5345	0.5298	0.7847	0.4654	0.6651	0.3201	0.6002	0.7982	0.713	0.6958	0.7482	0.5218	0.8436	0.5183	0.8625	0.5767	0.7872	0.7554	0.7349	0.7865	0.6149	0.8056	0.7155	0.7526	0.5725	0.4737	0.8229	0.6846	0.7747	0.5102	0.685	0.7371	0.7808	0.6527	0.3344
cg21562801	0.5751	0.7888	0.8262	0.8283	0.8437	0.8652	0.8149	0.7924	0.7847	0.8385	0.5159	0.7854	0.731	0.482	0.7879	0.7433	0.8508	0.3573	0.66	0.5256	0.8327	0.8434	0.7913	0.8431	0.9498	0.8162	0.8429	0.8224	0.8043	0.8758	0.8172	0.8103	0.624	0.8166	0.7691	0.7912	0.8243	0.8874	0.7827	0.8068	0.7617	0.754	0.8314	0.8268	0.7595	0.8353	0.8566	0.7942	0.807
cg18151858	0.0614	0.0469	0.0633	0.0567	0.0379	0.0628	0.0644	0.0609	0.1009	0.09	0.0298	0.0592	0.0879	0.9202	0.0512	0.1518	0.0688	0.0536	0.063	0.0746	0.0706	0.1276	0.0549	0.1037	0.0477	0.0577	0.0621	0.0679	0.0585	0.0688	0.0569	0.1351	0.2079	0.0833	0.1102	0.0517	0.0547	0.1029	0.0501	0.073	0.6645	0.5057	0.0779	0.0483	0.0773	0.0806	0.0972	0.093	0.1436
cg02156380	0.0512	0.1236	0.0876	0.0325	0.0548	0.0925	0.0711	0.0603	0.0475	0.0896	0.0872	0.0711	0.3263	0.8841	0.0491	0.1582	0.0354	0.04	0.0756	0.0647	0.0939	0.1501	0.1092	0.0505	0.0354	0.0903	0.1176	0.1291	0.1359	0.0542	0.0442	0.3946	0.1763	0.0471	0.1291	0.1127	0.0803	0.0526	0.0799	0.0562	0.741	0.8147	0.1008	0.0437	0.087	0.0997	0.1267	0.1599	0.2355
cg20752903	0.018	0.0191	0.0222	0.0154	0.0237	0.0167	0.022	0.0219	0.0179	0.0214	0.0159	0.0226	0.0202	0.9069	0.0215	0.0213	0.0133	0.0155	0.0261	0.0198	0.0237	0.0196	0.0204	0.0212	0.0183	0.017	0.0178	0.0158	0.0137	0.0222	0.0177	0.0246	0.0225	0.0253	0.0193	0.0209	0.0211	0.0223	0.0179	0.0189	0.5689	0.6827	0.0198	0.0165	0.0204	0.0268	0.0227	0.0244	0.0199
cg08841511	0.0238	0.0418	0.0466	0.0241	0.0365	0.0215	0.0356	0.0405	0.0331	0.0505	0.0353	0.0314	0.0381	0.0272	0.0379	0.0458	0.0308	0.0309	0.0427	0.0347	0.0433	0.0809	0.031	0.0302	0.0289	0.0364	0.0396	0.0312	0.0438	0.0303	0.0341	0.0903	0.1238	0.0307	0.0653	0.0544	0.0435	0.0277	0.0297	0.027	0.1778	0.0414	0.0499	0.0192	0.0516	0.0303	0.0415	0.0511	0.0378
cg05726661	0.0479	0.1092	0.1236	0.068	0.0299	0.0765	0.1027	0.0969	0.0143	0.1831	0.0979	0.051	0.031	0.8677	0.027	0.0713	0.0382	0.0312	0.0321	0.0334	0.0611	0.0549	0.0392	0.0461	0.0281	0.0321	0.0494	0.1328	0.0177	0.0299	0.0295	0.1231	0.2122	0.0318	0.1847	0.1132	0.0135	0.0379	0.0577	0.1341	0.1321	0.7393	0.0844	0.0422	0.1921	0.093	0.1563	0.0993	0.0482
cg09285418	0.1987	0.0601	0.1083	0.0516	0.0418	0.0638	0.0517	0.0413	0.0478	0.2237	0.3723	0.1586	0.2771	0.5797	0.0825	0.084	0.2896	0.3785	0.0365	0.3406	0.0943	0.0607	0.3374	0.3349	0.3975	0.051	0.0627	0.1172	0.0874	0.4175	0.1321	0.14	0.2819	0.0388	0.2458	0.0432	0.1345	0.4467	0.0738	0.4074	0.7576	0.6702	0.2366	0.1594	0.0974	0.0787	0.1879	0.2036	0.0814
cg12419239	0.9171	0.9364	0.9156	0.9397	0.9498	0.9441	0.9299	0.9473	0.9479	0.9602	0.9331	0.9399	0.9481	0.8094	0.9202	0.9487	0.9469	0.7326	0.9385	0.9346	0.9521	0.9435	0.919	0.9554	0.9009	0.9232	0.9321	0.957	0.9073	0.9382	0.9403	0.9413	0.9426	0.9299	0.917	0.9572	0.7166	0.9568	0.9169	0.9382	0.9505	0.9179	0.9251	0.9569	0.9607	0.9529	0.9512	0.9274	0.9408
cg24903006	0.1122	0.1196	0.0612	0.0769	0.0552	0.0707	0.0846	0.1522	0.0941	0.1127	0.0507	0.0798	0.1159	0.3813	0.1337	0.0643	0.1118	0.0688	0.1108	0.0855	0.096	0.0962	0.0776	0.0999	0.1111	0.0938	0.0902	0.0659	0.0969	0.0763	0.112	0.0867	0.1569	0.071	0.0815	0.0616	0.08	0.0793	0.0755	0.1246	0.824	0.0833	0.1075	0.0675	0.1003	0.103	0.0536	0.1366	0.0729
cg23086720	0.0464	0.0785	0.0393	0.0454	0.0406	0.0326	0.0403	0.1057	0.0606	0.0403	0.0313	0.0336	0.0576	0.0453	0.0516	0.0736	0.0423	0.0347	0.0357	0.0469	0.0406	0.057	0.0492	0.0494	0.0473	0.0286	0.03	0.0347	0.0772	0.0374	0.0363	0.0377	0.0453	0.078	0.0416	0.0351	0.0413	0.0432	0.0416	0.0344	0.0355	0.0391	0.0521	0.039	0.0366	0.0369	0.0304	0.0858	0.0387
cg24878755	0.0314	0.044	0.0451	0.0264	0.0752	0.0301	0.0547	0.0356	0.0474	0.0332	0.0492	0.0321	0.0409	0.6078	0.0492	0.0495	0.1507	0.0842	0.0287	0.0337	0.0384	0.0615	0.0376	0.047	0.0266	0.0352	0.0273	0.0307	0.0306	0.0268	0.06	0.0316	0.0348	0.0335	0.0581	0.0318	0.0338	0.052	0.0244	0.0343	0.8051	0.7601	0.0677	0.0316	0.0309	0.0344	0.1394	0.0555	0.0571
cg14426001	0.2026	0.145	0.1193	0.1751	0.2824	0.5198	0.5204	0.4247	0.2807	0.119	0.6058	0.1003	0.4502	0.9007	0.3015	0.2645	0.6952	0.6506	0.082	0.2741	0.0992	0.3024	0.2434	0.4342	0.1375	0.2163	0.0891	0.1715	0.1695	0.1976	0.3727	0.1929	0.2276	0.336	0.4167	0.1418	0.3065	0.5123	0.2334	0.3326	0.8878	0.7723	0.5026	0.7677	0.1236	0.7925	0.6223	0.4715	0.6028
cg13910983	0.026	0.0271	0.0206	0.023	0.0237	0.0178	0.0206	0.0279	0.0403	0.0247	0.2364	0.0239	0.0247	0.0256	0.026	0.0347	0.0209	0.0224	0.0247	0.0233	0.0197	0.0324	0.0224	0.0294	0.0256	0.0211	0.0228	0.0234	0.0197	0.0287	0.0274	0.0208	0.021	0.0251	0.0228	0.0233	0.025	0.0235	0.0212	0.021	0.0255	0.0213	0.0262	0.0197	0.0225	0.0241	0.0197	0.0244	0.0259
cg14099335	0.0337	0.0374	0.0329	0.0186	0.0271	0.0301	0.0292	0.0381	0.0257	0.0445	0.0268	0.0273	0.0225	0.8666	0.0383	0.046	0.0374	0.0278	0.038	0.0294	0.0467	0.0303	0.0405	0.0255	0.0392	0.0309	0.0402	0.0309	0.0169	0.0323	0.0294	0.0499	0.0278	0.0262	0.0255	0.0402	0.0186	0.0287	0.0171	0.0254	0.6199	0.4544	0.0257	0.0308	0.0433	0.029	0.0386	0.0438	0.0288
cg20372821	0.7849	0.8253	0.8269	0.9516	0.5499	0.9004	0.8444	0.4501	0.9309	0.6623	0.6505	0.8677	0.539	0.4278	0.536	0.5972	0.6677	0.6018	0.7576	0.5872	0.9384	0.7445	0.378	0.8819	0.7377	0.5812	0.7778	0.7856	0.8864	0.7829	0.6887	0.678	0.8156	0.9202	0.7593	0.8332	0.7222	0.9203	0.6894	0.5424	0.9267	0.93	0.86	0.4676	0.6093	0.918	0.7587	0.7525	0.3084
cg04322483	0.016	0.021	0.0191	0.0168	0.0177	0.0163	0.0202	0.1745	0.0211	0.0231	0.0225	0.0256	0.0173	0.5371	0.0223	0.0251	0.0176	0.0176	0.0212	0.0182	0.0193	0.0238	0.3451	0.0203	0.0162	0.019	0.0204	0.0182	0.016	0.0232	0.24	0.0257	0.0191	0.1354	0.0223	0.0312	0.019	0.0216	0.0171	0.0188	0.0243	0.0203	0.0185	0.0148	0.0237	0.0482	0.0267	0.028	0.0213
cg07154408	0.1077	0.0996	0.0814	0.0698	0.1066	0.2946	0.1221	0.1449	0.1104	0.0806	0.0888	0.0502	0.1865	0.1867	0.1055	0.1134	0.0862	0.0593	0.0567	0.1169	0.0594	0.1677	0.0667	0.1607	0.0941	0.0554	0.052	0.0911	0.0959	0.0965	0.1118	0.0644	0.0644	0.1383	0.1138	0.0627	0.1083	0.1289	0.1003	0.1905	0.0653	0.0813	0.1246	0.1022	0.063	0.1058	0.0608	0.114	0.1142
cg20131596	0.3522	0.3146	0.363	0.4326	0.2782	0.2617	0.2438	0.3163	0.1368	0.421	0.2617	0.2177	0.1644	0.8564	0.1314	0.279	0.6783	0.4364	0.2256	0.3301	0.505	0.3497	0.2222	0.2252	0.1498	0.2228	0.321	0.3545	0.4636	0.3187	0.1976	0.296	0.37	0.1367	0.3718	0.2873	0.3651	0.2076	0.3762	0.2904	0.8205	0.8014	0.2686	0.222	0.2321	0.1776	0.2617	0.5916	0.4781
cg09123257	0.0149	0.0236	0.0263	0.0296	0.0269	0.0244	0.0286	0.0248	0.0344	0.0283	0.0279	0.0294	0.0389	0.0347	0.026	0.0338	0.0567	0.0223	0.0292	0.0334	0.0507	0.0208	0.0301	0.0329	0.0145	0.0282	0.0271	0.0289	0.0211	0.0204	0.0235	0.0303	0.0482	0.0303	0.0261	0.0407	0.0254	0.0254	0.0262	0.0269	0.0614	0.0517	0.0282	0.0285	0.0364	0.0347	0.0296	0.0317	0.0475
cg18472460	0.0239	0.0392	0.0315	0.0254	0.0334	0.0265	0.0496	0.0338	0.0333	0.042	0.0354	0.0547	0.0292	0.0285	0.0368	0.0326	0.0181	0.0252	0.0356	0.0226	0.0468	0.0294	0.0448	0.024	0.0307	0.0315	0.0368	0.0259	0.0391	0.0262	0.0293	0.0378	0.041	0.0348	0.0277	0.0478	0.0237	0.0284	0.0302	0.0231	0.0236	0.0189	0.0284	0.0253	0.038	0.0276	0.0392	0.0415	0.0227
cg00948524	0.0718	0.0217	0.0312	0.0469	0.083	0.0715	0.138	0.1056	0.0252	0.0382	0.4607	0.058	0.6648	0.8472	0.023	0.0425	0.5436	0.0495	0.0427	0.4279	0.0291	0.041	0.3774	0.3149	0.3777	0.0465	0.0485	0.0291	0.0241	0.0239	0.3107	0.1523	0.1254	0.0484	0.1667	0.0327	0.0429	0.0994	0.0407	0.4332	0.7314	0.7066	0.3448	0.0201	0.049	0.1125	0.1002	0.0319	0.3733
cg05802072	0.7662	0.7457	0.9379	0.8612	0.8888	0.7992	0.8925	0.6097	0.6655	0.8233	0.7783	0.9164	0.8087	0.8359	0.7202	0.8215	0.8368	0.8464	0.8885	0.8265	0.9222	0.8764	0.9315	0.7878	0.7319	0.7909	0.8237	0.7881	0.7944	0.8883	0.8102	0.936	0.9204	0.8945	0.8192	0.8976	0.8666	0.789	0.6759	0.8816	0.8959	0.8209	0.8149	0.7294	0.9358	0.894	0.8842	0.6616	0.8709
cg06883949	0.0109	0.0131	0.0145	0.0095	0.0094	0.0094	0.0129	0.0158	0.0111	0.0134	0.0089	0.0127	0.0115	0.0118	0.0126	0.0143	0.0123	0.0103	0.0114	0.0117	0.0126	0.0117	0.0144	0.0112	0.0103	0.015	0.0117	0.0104	0.0088	0.0127	0.0101	0.0142	0.0151	0.0119	0.0113	0.0143	0.0128	0.0101	0.0104	0.0124	0.0393	0.0106	0.0109	0.0088	0.0104	0.0154	0.0126	0.0155	0.0109
cg09972205	0.0141	0.0159	0.0155	0.0111	0.0143	0.0107	0.0161	0.0164	0.0134	0.0221	0.0123	0.0147	0.0147	0.0139	0.0149	0.0174	0.0154	0.012	0.0134	0.0165	0.019	0.0153	0.0165	0.0154	0.0113	0.0139	0.0124	0.014	0.0135	0.0165	0.0185	0.0185	0.0194	0.309	0.0117	0.0171	0.016	0.0128	0.0123	0.0135	0.022	0.0118	0.0132	0.0107	0.0149	0.0174	0.0166	0.0169	0.02
cg14320593	0.0503	0.0371	0.0407	0.0225	0.0288	0.0311	0.0621	0.0698	0.028	0.0661	0.0275	0.0609	0.0434	0.0468	0.0439	0.0675	0.0242	0.0214	0.0498	0.0442	0.0543	0.0244	0.0612	0.0418	0.0221	0.0497	0.0663	0.0398	0.0267	0.0436	0.0609	0.0531	0.0567	0.0306	0.0334	0.0537	0.0254	0.0608	0.0469	0.0269	0.0784	0.0317	0.0306	0.0137	0.0667	0.0694	0.0729	0.0376	0.0233
cg12352006	0.0235	0.0436	0.0389	0.0327	0.0292	0.0299	0.0437	0.0478	0.0749	0.0506	0.0335	0.0399	0.0394	0.0453	0.0431	0.0429	0.0464	0.0525	0.0377	0.0481	0.0343	0.0535	0.0432	0.0371	0.034	0.0345	0.0374	0.0329	0.0327	0.0391	0.0464	0.0369	0.0542	0.0402	0.0395	0.0466	0.0349	0.0362	0.0372	0.0398	0.0447	0.0617	0.0388	0.0505	0.0451	0.0484	0.0457	0.0415	0.0453
cg21330407	0.7782	0.8588	0.915	0.8533	0.6756	0.8746	0.7951	0.7421	0.8088	0.9061	0.8603	0.723	0.5319	0.799	0.6923	0.8242	0.8891	0.8472	0.8524	0.2829	0.9321	0.8509	0.3509	0.8365	0.8225	0.6793	0.8609	0.8492	0.7167	0.9153	0.8793	0.922	0.8217	0.3899	0.8673	0.705	0.876	0.8697	0.623	0.3211	0.911	0.8876	0.8738	0.8492	0.8301	0.8859	0.8776	0.7164	0.4104
cg23933345	0.0311	0.0256	0.0306	0.0213	0.0214	0.0202	0.0262	0.0233	0.0288	0.0315	0.029	0.0269	0.0222	0.0283	0.02	0.0344	0.0214	0.0212	0.0254	0.032	0.0276	0.026	0.0238	0.0244	0.0273	0.0211	0.0206	0.0232	0.0254	0.0212	0.0372	0.027	0.0302	0.0389	0.0291	0.0311	0.0186	0.0214	0.0156	0.031	0.0444	0.023	0.0197	0.0155	0.0318	0.0332	0.0292	0.0319	0.0295
cg04835615	0.0517	0.0531	0.0641	0.0496	0.0582	0.0342	0.0739	0.0576	0.07	0.0604	0.0621	0.0571	0.0691	0.0778	0.0615	0.0805	0.0694	0.0619	0.043	0.0719	0.0594	0.0601	0.0645	0.0639	0.0393	0.051	0.0609	0.0483	0.0487	0.0549	0.0753	0.0653	0.0985	0.0667	0.0508	0.0654	0.057	0.0726	0.0476	0.0954	0.0802	0.0745	0.062	0.0515	0.0708	0.0767	0.072	0.0613	0.063
cg23833588	0.0235	0.0198	0.0192	0.0218	0.0182	0.0154	0.0289	0.033	0.0209	0.0203	0.5744	0.0191	0.0215	0.9553	0.0257	0.0203	0.0202	0.0189	0.0229	0.0179	0.0218	0.0211	0.0199	0.0203	0.0355	0.0237	0.0213	0.0162	0.0223	0.0161	0.0187	0.0166	0.0203	0.0181	0.0164	0.0241	0.0199	0.0176	0.023	0.0168	0.5301	0.7354	0.0178	0.0231	0.0161	0.0231	0.0207	0.0297	0.0318
cg02341503	0.1218	0.1229	0.0865	0.0539	0.2485	0.0893	0.1724	0.1966	0.0297	0.204	0.2031	0.0573	0.166	0.5904	0.177	0.0948	0.3425	0.3951	0.1496	0.3266	0.1548	0.1997	0.1504	0.2461	0.0974	0.1277	0.1662	0.34	0.2596	0.0894	0.1789	0.2889	0.2815	0.1108	0.1674	0.1647	0.1143	0.0933	0.1278	0.1679	0.7436	0.4776	0.1204	0.161	0.1011	0.1847	0.3037	0.3926	0.2142
cg15233183	0.1034	0.0551	0.0465	0.0447	0.0505	0.0531	0.0419	0.0596	0.0467	0.0448	0.04	0.0618	0.0449	0.0432	0.0611	0.0479	0.0497	0.0484	0.0477	0.0508	0.0525	0.0427	0.0438	0.0437	0.0522	0.0468	0.0348	0.0493	0.0757	0.0339	0.04	0.0586	0.0572	0.0388	0.0556	0.0624	0.0382	0.0379	0.0534	0.0461	0.4172	0.0937	0.0353	0.0535	0.0649	0.0592	0.0474	0.065	0.0417
cg21504064	0.177	0.1152	0.118	0.099	0.0859	0.0785	0.0912	0.1248	0.1281	0.103	0.0804	0.0581	0.1362	0.6002	0.0996	0.0876	0.1283	0.0881	0.0499	0.1062	0.0811	0.0974	0.0834	0.1225	0.1215	0.0632	0.0669	0.1075	0.0778	0.0818	0.0964	0.1208	0.2073	0.1504	0.1672	0.0905	0.1103	0.1094	0.1287	0.0769	0.5289	0.7252	0.1434	0.135	0.0981	0.1165	0.1189	0.1424	0.097
cg06725035	0.0874	0.0707	0.0933	0.0671	0.0854	0.0834	0.0992	0.068	0.1384	0.0942	0.0812	0.1035	0.1756	0.2767	0.0754	0.1611	0.0711	0.0807	0.0819	0.1421	0.0845	0.1273	0.086	0.1174	0.08987	0.0746	0.0765	0.0852	0.0821	0.1081	0.2208	0.1028	0.083	0.1604	0.1105	0.0838	0.1066	0.1363	0.0934	0.1318	0.1265	0.0961	0.1159	0.0647	0.0882	0.1013	0.0703	0.0839	0.1673
cg15460816	0.9172	0.9099	0.9154	0.7388	0.567	0.8972	0.7173	0.762	0.9154	0.8809	0.6649	0.863	0.6966	0.24	0.5228	0.8714	0.5742	0.845	0.802	0.6663	0.9335	0.7658	0.7683	0.6908	0.7775	0.6687	0.8191	0.8672	0.8303	0.8917	0.9219	0.9092	0.7309	0.8802	0.9219	0.9031	0.7027	0.9303	0.8046	0.8816	0.9074	0.8059	0.9095	0.5829	0.8883	0.927	0.8676	0.8325	0.8466
cg05800761	0.8143	0.8728	0.7118	0.8515	0.8972	0.709	0.9165	0.2477	0.8523	0.7541	0.9297	0.9223	0.7702	0.2098	0.839	0.728	0.5761	0.3836	0.9034	0.2607	0.789	0.7834	0.4789	0.8637	0.6471	0.7977	0.6265	0.6073	0.8349	0.4547	0.5666	0.769	0.5659	0.8206	0.3516	0.7228	0.8224	0.8866	0.8125	0.5703	0.9314	0.3434	0.8853	0.4118	0.7761	0.9239	0.9177	0.5979	0.4858
cg24553728	0.9257	0.9573	0.9383	0.9426	0.9542	0.9516	0.9497	0.8756	0.9199	0.9546	0.9554	0.9229	0.945	0.8866	0.9233	0.9258	0.9295	0.8513	0.9298	0.9388	0.9529	0.9552	0.9493	0.946	0.9546	0.9055	0.9494	0.9251	0.9437	0.951	0.9298	0.946	0.944	0.9451	0.6866	0.9359	0.9396	0.9509	0.958	0.94	0.9503	0.9204	0.9488	0.9358	0.9561	0.9331	0.9483	0.9069	0.8848
cg06008480	0.0297	0.12	0.0308	0.022	0.0215	0.0273	0.0278	0.0484	0.0251	0.0244	0.2816	0.0391	0.646	0.9726	0.0353	0.0198	0.2448	0.453	0.0255	0.3509	0.025	0.0333	0.2516	0.0334	0.035	0.1275	0.0258	0.2626	0.0258	0.0274	0.0283	0.0391	0.0795	0.0308	0.3513	0.0228	0.0393	0.0391	0.0244	0.5637	0.855	0.8655	0.0407	0.0176	0.0226	0.2052	0.2287	0.2672	0.0303
cg02810134	0.8632	0.8666	0.8915	0.913	0.8574	0.8924	0.8951	0.8503	0.8318	0.8888	0.8341	0.8721	0.7963	0.6429	0.8402	0.8176	0.8644	0.8125	0.8663	0.7862	0.9059	0.8563	0.8746	0.837	0.9214	0.8369	0.882	0.8461	0.9559	0.8854	0.8269	0.8699	0.8877	0.8555	0.9167	0.8773	0.9004	0.8584	0.9165	0.8275	0.8021	0.7747	0.8568	0.7421	0.8588	0.8632	0.8217	0.7627	0.7009
cg11810310	0.115	0.141	0.1303	0.0641	0.0952	0.1347	0.1366	0.1458	0.1442	0.1136	0.1346	0.0964	0.1465	0.1701	0.1457	0.1659	0.1425	0.1051	0.1024	0.1462	0.1396	0.1025	0.1694	0.1702	0.0374	0.0907	0.1277	0.1238	0.086	0.1139	0.2041	0.1573	0.1512	0.0891	0.0766	0.1429	0.172	0.1447	0.1001	0.1163	0.2084	0.1196	0.1287	0.1496	0.1327	0.118	0.1337	0.2216	0.2194
cg22901226	0.0642	0.1989	0.069	0.1355	0.1466	0.1187	0.0778	0.1845	0.1818	0.0576	0.1	0.0504	0.188	0.1366	0.1289	0.322	0.1291	0.1202	0.0707	0.1332	0.0566	0.1342	0.0808	0.1066	0.0363	0.1795	0.0574	0.1631	0.1469	0.0737	0.2505	0.0689	0.0892	0.1423	0.1907	0.0719	0.1305	0.1228	0.1398	0.1191	0.2194	0.1025	0.1268	0.1839	0.0656	0.0673	0.089	0.2179	0.2257
cg24921221	0.0802	0.3543	0.3389	0.1486	0.0908	0.1198	0.1251	0.0816	0.0678	0.2886	0.2515	0.1089	0.1195	0.6757	0.0705	0.3161	0.1028	0.1592	0.3083	0.3898	0.1639	0.0605	0.1658	0.1512	0.0933	0.2158	0.1989	0.3587	0.384	0.1373	0.0661	0.2374	0.3432	0.1161	0.4889	0.1855	0.2746	0.1011	0.3451	0.1083	0.6273	0.701	0.1305	0.1133	0.2123	0.0924	0.3325	0.292	0.2842
cg21377598	0.021	0.026	0.0303	0.0243	0.0185	0.019	0.03	0.0284	0.0277	0.0296	0.0266	0.0228	0.0254	0.0323	0.0376	0.0327	0.024	0.0198	0.0308	0.0259	0.0283	0.0311	0.0387	0.0343	0.0203	0.023	0.0231	0.0212	0.0198	0.0402	0.0292	0.025	0.0297	0.0249	0.0184	0.0334	0.027	0.0272	0.0255	0.0328	0.0249	0.0236	0.0275	0.015	0.0257	0.032	0.0279	0.0363	0.0265
cg24491895	0.8119	0.8006	0.9355	0.8639	0.8726	0.9057	0.9362	0.7631	0.8563	0.9472	0.9084	0.942	0.6652	0.7685	0.7008	0.886	0.9046	0.867	0.9428	0.8222	0.9421	0.8937	0.9425	0.9016	0.7422	0.9184	0.9183	0.8927	0.8594	0.9293	0.9066	0.9414	0.9389	0.8916	0.8579	0.9556	0.8967	0.9156	0.8322	0.8906	0.9481	0.7871	0.8933	0.8685	0.9326	0.8907	0.9472	0.7034	0.9075
cg05417332	0.1216	0.1518	0.1221	0.0913	0.1285	0.1479	0.1651	0.0917	0.2229	0.1284	0.226	0.1444	0.1764	0.1318	0.1502	0.1979	0.1262	0.09	0.1402	0.3058	0.1283	0.1038	0.1288	0.1511	0.1798	0.1115	0.1062	0.2019	0.0772	0.2209	0.2653	0.1939	0.186	0.1583	0.1597	0.1431	0.0689	0.153	0.0718	0.0979	0.7425	0.7213	0.1599	0.1427	0.1586	0.2156	0.1731	0.2599	0.3102
cg27513572	0.755	0.9333	0.9323	0.7469	0.8828	0.9401	0.9116	0.6734	0.9437	0.8922	0.8167	0.8746	0.7307	0.6472	0.8817	0.8887	0.9264	0.7571	0.6776	0.5304	0.94	0.946	0.8855	0.9297	0.8965	0.8327	0.8461	0.8037	0.9133	0.9145	0.9227	0.8709	0.8759	0.9325	0.9197	0.9252	0.9226	0.9428	0.9016	0.9031	0.949	0.9102	0.9382	0.8503	0.8003	0.9211	0.8806	0.8956	0.8749
cg12806797	0.4605	0.5398	0.3129	0.6269	0.6245	0.6145	0.7891	0.8698	0.5267	0.373	0.859	0.8435	0.6964	0.933	0.6533	0.4787	0.8153	0.8304	0.2321	0.9462	0.3361	0.8506	0.6838	0.7197	0.6781	0.5492	0.6989	0.4965	0.527	0.8642	0.9249	0.6019	0.5474	0.4356	0.6973	0.4885	0.5769	0.6454	0.6023	0.5731	0.9163	0.7889	0.5984	0.6398	0.3074	0.8545	0.4262	0.8716	0.8841
cg26171231	0.0298	0.0405	0.0326	0.0278	0.039	0.0294	0.0303	0.0472	0.0399	0.0294	0.0311	0.028	0.0336	0.0306	0.0383	0.0589	0.0276	0.0227	0.0227	0.031	0.0274	0.037	0.0296	0.0466	0.0214	0.0253	0.0278	0.0301	0.0295	0.0297	0.0302	0.0276	0.0284	0.0333	0.0327	0.0352	0.0282	0.0341	0.027	0.0341	0.0345	0.0312	0.0366	0.041	0.0276	0.0375	0.0292	0.0441	0.0345
cg19484183	0.0806	0.0559	0.056	0.0606	0.0756	0.0457	0.0577	0.0608	0.0659	0.0739	0.058	0.0498	0.0546	0.0486	0.035	0.0734	0.052	0.0811	0.0509	0.0499	0.0484	0.0524	0.059	0.052	0.067	0.0435	0.0471	0.0444	0.0541	0.0541	0.0449	0.0922	0.0764	0.0751	0.053	0.0868	0.0555	0.0482	0.0532	0.0414	0.0729	0.0784	0.055	0.0505	0.051	0.0607	0.0725	0.0765	0.0481
cg03958038	0.052	0.0543	0.0842	0.0342	0.0404	0.0665	0.0564	0.0874	0.0362	0.0894	0.5077	0.0455	0.054	0.5262	0.0307	0.1619	0.041	0.814	0.0537	0.647	0.0589	0.1129	0.0919	0.2535	0.0367	0.0484	0.0535	0.056	0.0374	0.0461	0.2988	0.0729	0.1126	0.0491	0.3583	0.1053	0.1387	0.033	0.0541	0.0555	0.5382	0.4989	0.0568	0.0342	0.0623	0.3291	0.5115	0.0588	0.0433
cg14296882	0.5935	0.779	0.9191	0.79	0.7214	0.7655	0.8821	0.7108	0.7922	0.91	0.7852	0.8641	0.7112	0.7962	0.7548	0.8318	0.8336	0.8058	0.8512	0.8214	0.8815	0.8991	0.8501	0.7425	0.6175	0.7245	0.8354	0.7843	0.6389	0.896	0.8194	0.7836	0.8412	0.6807	0.7607	0.8826	0.8139	0.8228	0.6847	0.8855	0.87	0.6834	0.7948	0.8119	0.8888	0.8562	0.8433	0.7009	0.492
cg10084902	0.3262	0.4321	0.5539	0.6311	0.65	0.5671	0.433	0.6129	0.7353	0.4741	0.633	0.6939	0.6413	0.804	0.7459	0.5589	0.7957	0.5849	0.352	0.7054	0.6277	0.5307	0.6996	0.5599	0.3636	0.4945	0.4829	0.47	0.3635	0.4159	0.5957	0.3574	0.5838	0.3891	0.5043	0.3782	0.2752	0.4932	0.4405	0.3068	0.6852	0.7016	0.6122	0.6233	0.6227	0.5562	0.3874	0.5294	0.6895
cg20173059	0.0529	0.0996	0.0405	0.0401	0.0701	0.0422	0.0475	0.1849	0.0407	0.0449	0.2264	0.0853	0.7726	0.8858	0.5275	0.033	0.598	0.5064	0.0435	0.4212	0.042	0.0413	0.4461	0.0435	0.1612	0.6595	0.0337	0.3418	0.0436	0.0671	0.0568	0.1181	0.2352	0.0374	0.501	0.0609	0.0662	0.1038	0.1492	0.5146	0.8237	0.7584	0.1755	0.0268	0.0424	0.3084	0.4523	0.2904	0.1195
cg20101015	0.724	0.821	0.8977	0.6303	0.7375	0.8456	0.6241	0.2679	0.6305	0.829	0.286	0.6293	0.4411	0.5339	0.4119	0.5821	0.5525	0.2196	0.6153	0.303	0.9135	0.5699	0.3207	0.8806	0.6381	0.5648	0.857	0.6798	0.8597	0.4789	0.6923	0.6159	0.551	0.7983	0.4504	0.7584	0.8331	0.7925	0.7597	0.3993	0.9121	0.8197	0.7545	0.2245	0.5388	0.7991	0.7624	0.5533	0.3127
cg24293588	0.0311	0.044	0.0597	0.0435	0.0415	0.0334	0.0607	0.0395	0.0762	0.0447	0.0496	0.0475	0.089	0.0535	0.0827	0.0658	0.0747	0.0489	0.0543	0.0638	0.0703	0.0646	0.0533	0.0852	0.0266	0.0476	0.0578	0.0399	0.028	0.0498	0.0541	0.053	0.1097	0.0814	0.0327	0.1058	0.0595	0.0419	0.0263	0.0608	0.0655	0.037	0.0497	0.052	0.0559	0.0542	0.0904	0.0628	0.0426
cg22249612	0.0349	0.0366	0.0238	0.1821	0.0187	0.0173	0.0197	0.0439	0.0267	0.026	0.6047	0.0211	0.02	0.0742	0.0226	0.0399	0.0163	0.0152	0.0248	0.0258	0.0241	0.0621	0.0263	0.0239	0.0538	0.0257	0.0328	0.0383	0.0378	0.0214	0.0226	0.0187	0.0289	0.0268	0.0234	0.0279	0.0277	0.0231	0.0234	0.0199	0.352	0.3409	0.0228	0.0194	0.0193	0.0176	0.0218	0.2305	0.1341
cg18203880	0.3582	0.0985	0.0635	0.118	0.0695	0.1236	0.1122	0.1433	0.1232	0.0774	0.1115	0.056	0.083	0.16	0.1015	0.0814	0.113	0.0687	0.0751	0.1477	0.0937	0.1589	0.0655	0.1945	0.0956	0.0379	0.0698	0.0667	0.093	0.0887	0.1562	0.0709	0.0577	0.6242	0.0629	0.0959	0.168	0.1851	0.083	0.1145	0.0902	0.0991	0.1911	0.0947	0.0606	0.0912	0.094	0.1526	0.0588
cg09459982	0.344	0.3408	0.4024	0.2751	0.257	0.1916	0.3415	0.1992	0.1958	0.2677	0.2922	0.4403	0.2139	0.0799	0.1791	0.2995	0.2414	0.185	0.4102	0.1662	0.2982	0.6992	0.2141	0.4258	0.4436	0.2955	0.3365	0.2784	0.4123	0.2798	0.2364	0.4454	0.2957	0.2317	0.2795	0.4014	0.3893	0.4624	0.3463	0.1921	0.1785	0.1386	0.3495	0.1491	0.2522	0.2693	0.4833	0.2326	0.2562
cg22794772	0.4821	0.761	0.9159	0.7451	0.7798	0.8336	0.7272	0.432	0.8899	0.9182	0.6751	0.8456	0.6448	0.5753	0.4112	0.6146	0.8113	0.7211	0.8625	0.6649	0.8566	0.8237	0.881	0.8716	0.6146	0.7782	0.867	0.6186	0.7613	0.9106	0.862	0.7555	0.8257	0.7202	0.6307	0.8963	0.7915	0.8942	0.6241	0.5406	0.8901	0.5191	0.7876	0.5817	0.8725	0.9105	0.8812	0.7547	0.8262
cg14961476	0.7039	0.7249	0.5607	0.4861	0.5847	0.7744	0.6441	0.193	0.7452	0.422	0.4227	0.6674	0.3867	0.131	0.4653	0.3544	0.6143	0.5987	0.4149	0.1199	0.7378	0.8929	0.3629	0.8595	0.5194	0.4461	0.5743	0.3487	0.6952	0.8459	0.8107	0.7352	0.4916	0.4289	0.4264	0.8022	0.7215	0.8396	0.7342	0.4538	0.3487	0.3776	0.77	0.4371	0.3283	0.6199	0.7333	0.4953	0.2686
cg18222083	0.0655	0.0269	0.0251	0.0308	0.0256	0.0319	0.0257	0.0317	0.0291	0.0371	0.029	0.0272	0.0519	0.9777	0.0224	0.0308	0.0466	0.0217	0.0226	0.0312	0.0204	0.0325	0.0243	0.0392	0.0529	0.0289	0.0299	0.0601	0.0338	0.0295	0.0301	0.0921	0.2088	0.0472	0.2438	0.0225	0.0319	0.0353	0.0358	0.0297	0.8521	0.9406	0.0411	0.0397	0.0357	0.0271	0.0679	0.0544	0.0353
cg25341423	0.1281	0.0998	0.0701	0.0766	0.0742	0.0588	0.0658	0.1157	0.1018	0.07	0.0655	0.0592	0.1068	0.0913	0.0899	0.089	0.1038	0.093	0.0579	0.0754	0.0683	0.0962	0.0679	0.111	0.1291	0.0565	0.0604	0.0756	0.0879	0.0718	0.0907	0.0872	0.0845	0.1155	0.0755	0.0678	0.1047	0.0908	0.0899	0.0921	0.0791	0.0871	0.1015	0.0728	0.0817	0.0705	0.0785	0.1236	0.1149
cg24779195	0.7007	0.7516	0.8666	0.7614	0.6823	0.8483	0.6702	0.485	0.7496	0.8808	0.6184	0.8148	0.5932	0.5794	0.5461	0.8371	0.7007	0.619	0.7878	0.7287	0.8883	0.8261	0.754	0.858	0.7616	0.6543	0.8687	0.7041	0.8828	0.8691	0.7477	0.8752	0.6901	0.8734	0.6931	0.8433	0.6512	0.8629	0.7266	0.7688	0.8379	0.8361	0.8448	0.8132	0.7138	0.6584	0.7976	0.7171	0.6886
cg26561570	0.8815	0.6862	0.7746	0.4903	0.5691	0.6014	0.5044	0.3033	0.7258	0.6525	0.2818	0.6198	0.7122	0.064	0.1563	0.5681	0.6358	0.4081	0.7008	0.3582	0.8849	0.6392	0.4162	0.7089	0.6633	0.5518	0.7163	0.4938	0.8367	0.6043	0.3624	0.6715	0.6176	0.473	0.6503	0.7623	0.6492	0.4879	0.5453	0.4347	0.3487	0.3705	0.8096	0.3817	0.5051	0.7198	0.5996	0.335	0.2975
cg26954625	0.0207	0.0255	0.0236	0.0248	0.0193	0.0213	0.0347	0.0362	0.0228	0.0302	0.134	0.0266	0.022	0.666	0.0277	0.0246	0.0243	0.022	0.0254	0.0283	0.0248	0.0257	0.0245	0.0615	0.0654	0.0251	0.0318	0.0195	0.0304	0.0265	0.0264	0.0209	0.0251	0.026	0.0252	0.0241	0.0336	0.0253	0.0189	0.0241	0.5287	0.2436	0.0224	0.0183	0.0195	0.0275	0.0266	0.0452	0.0303
cg26471121	0.7771	0.919	0.9312	0.8964	0.91	0.9517	0.9275	0.6433	0.9266	0.932	0.8278	0.9127	0.868	0.6534	0.8729	0.8456	0.834	0.7806	0.8984	0.556	0.9459	0.9221	0.808	0.914	0.8629	0.5377	0.9245	0.9106	0.9187	0.9476	0.8986	0.9182	0.8856	0.9335	0.9306	0.9363	0.905	0.9268	0.9073	0.6691	0.9227	0.8556	0.9281	0.8232	0.925	0.9481	0.9279	0.8049	0.7697
cg01017349	0.8372	0.924	0.9407	0.9129	0.9325	0.9435	0.9298	0.8968	0.9147	0.9375	0.9332	0.9395	0.9196	0.9286	0.829	0.9153	0.9441	0.9139	0.9579	0.9381	0.9439	0.9377	0.89	0.9124	0.9031	0.9456	0.9508	0.9519	0.9086	0.9413	0.9419	0.9462	0.9233	0.9228	0.9406	0.9256	0.9415	0.9374	0.9217	0.9462	0.9274	0.8873	0.9333	0.9023	0.9256	0.9412	0.9414	0.904	0.9293
cg06301550	0.5272	0.3771	0.0972	0.1512	0.3996	0.4575	0.0756	0.4526	0.1023	0.145	0.4302	0.3516	0.4485	0.7646	0.0402	0.0631	0.4084	0.2605	0.2128	0.1373	0.122	0.0714	0.7386	0.3638	0.398	0.4082	0.0722	0.3123	0.1693	0.08	0.606	0.1495	0.2539	0.4568	0.2288	0.0911	0.0513	0.3288	0.2744	0.0724	0.7949	0.5681	0.3309	0.0522	0.1131	0.2362	0.3443	0.1958	0.3751
cg13419925	0.2322	0.4651	0.3677	0.197	0.2984	0.2817	0.3228	0.2242	0.3099	0.3496	0.8614	0.2564	0.3678	0.9124	0.175	0.4141	0.5484	0.5039	0.3663	0.2318	0.2785	0.8529	0.4596	0.5268	0.1597	0.3865	0.363	0.3362	0.705	0.1956	0.1461	0.2624	0.2889	0.2083	0.6292	0.3774	0.3542	0.6151	0.4245	0.4375	0.7565	0.8978	0.4587	0.1241	0.1658	0.2614	0.5525	0.4119	0.4069
cg15337055	0.0219	0.0443	0.037	0.0272	0.0434	0.0242	0.0423	0.0454	0.0404	0.0422	0.03	0.0419	0.0276	0.0357	0.048	0.0405	0.0343	0.0265	0.031	0.0251	0.0336	0.0318	0.0389	0.0252	0.0223	0.0351	0.0392	0.0276	0.0253	0.0349	0.0315	0.0441	0.0512	0.0242	0.0399	0.0424	0.0281	0.0255	0.026	0.0267	0.0443	0.0292	0.0344	0.0301	0.0428	0.0485	0.0348	0.1169	0.0285
cg09084936	0.0295	0.0195	0.0204	0.013	0.0161	0.0126	0.0196	0.0205	0.0175	0.0195	0.0182	0.0191	0.0194	0.0189	0.022	0.0193	0.0159	0.0143	0.0164	0.0186	0.0219	0.0193	0.0203	0.0179	0.0462	0.0208	0.0187	0.0139	0.0149	0.0237	0.0181	0.0187	0.0218	0.0198	0.0152	0.0197	0.0193	0.0198	0.0179	0.0159	0.0177	0.0134	0.0191	0.0146	0.0202	0.0211	0.0217	0.023	0.0188
cg10509187	0.0486	0.0694	0.0552	0.0835	0.0597	0.0413	0.101	0.0913	0.1343	0.1839	0.1309	0.073	0.1459	0.0618	0.0599	0.0542	0.1034	0.128	0.1707	0.0501	0.0715	0.3801	0.0659	0.1512	0.0786	0.0342	0.1139	0.0894	0.0756	0.0536	0.3024	0.0954	0.1149	0.0853	0.0641	0.0898	0.0576	0.0819	0.0415	0.0853	0.7993	0.3782	0.0695	0.0482	0.0858	0.0887	0.097	0.0706	0.059
cg23422263	0.0402	0.0388	0.0459	0.033	0.0288	0.0287	0.0412	0.0472	0.0492	0.042	0.023	0.0275	0.0651	0.0413	0.0299	0.067	0.0405	0.0306	0.0332	0.0598	0.0308	0.0461	0.0379	0.0454	0.0451	0.0307	0.0321	0.0348	0.0389	0.0459	0.041	0.0427	0.0453	0.0515	0.0261	0.0426	0.0505	0.0399	0.0233	0.031	0.0463	0.0364	0.0429	0.0427	0.0458	0.0394	0.0349	0.0509	0.0579
cg14254867	0.0356	0.0687	0.0637	0.0337	0.0482	0.0453	0.0675	0.0436	0.058	0.0645	0.0755	0.0721	0.0404	0.0335	0.0577	0.0505	0.0485	0.0437	0.0615	0.0492	0.0743	0.0505	0.0681	0.0402	0.0453	0.0587	0.058	0.0554	0.0471	0.0486	0.0287	0.0982	0.0866	0.0356	0.1348	0.0563	0.0305	0.0317	0.0349	0.0422	0.0804	0.037	0.0444	0.0388	0.0533	0.0761	0.0777	0.0503	0.0306
cg01334682	0.0561	0.0604	0.0836	0.0461	0.07	0.0703	0.0808	0.0596	0.0322	0.08	0.0572	0.0702	0.2636	0.3218	0.0713	0.0443	0.0474	0.2233	0.0582	0.0994	0.0834	0.1693	0.0798	0.0582	0.231	0.0608	0.0667	0.0518	0.0576	0.0557	0.0521	0.1064	0.0825	0.0542	0.093	0.0594	0.0442	0.0656	0.0559	0.1368	0.6583	0.6513	0.0667	0.0482	0.0743	0.0794	0.098	0.0577	0.0558
cg26459500	0.0363	0.0441	0.0844	0.0395	0.0458	0.0284	0.0705	0.0465	0.0464	0.0746	0.0383	0.061	0.0551	0.318	0.0594	0.0457	0.0579	0.4067	0.0749	0.0675	0.0946	0.0448	0.0998	0.1081	0.0582	0.0557	0.0518	0.0415	0.0562	0.084	0.0507	0.0866	0.0565	0.0737	0.0511	0.0819	0.061	0.0548	0.0622	0.0441	0.7953	0.553	0.0729	0.0429	0.1014	0.0567	0.071	0.0454	0.0468
cg03950246	0.1844	0.1833	0.0764	0.0703	0.1841	0.0716	0.3215	0.165	0.0738	0.1207	0.6745	0.0459	0.1035	0.0946	0.2112	0.1494	0.6933	0.1141	0.0848	0.079	0.0834	0.2483	0.0809	0.3638	0.0774	0.1179	0.122	0.1226	0.1443	0.093	0.1368	0.0866	0.0953	0.1137	0.0954	0.1224	0.093	0.1821	0.3254	0.0883	0.2449	0.6346	0.2122	0.0852	0.0599	0.0832	0.135	0.2726	0.1296
cg10131095	0.0274	0.0557	0.0538	0.0341	0.0292	0.0394	0.0473	0.2628	0.0401	0.0484	0.0346	0.0296	0.064	0.1643	0.0563	0.0541	0.1681	0.1014	0.0527	0.048	0.0559	0.1145	0.0454	0.0654	0.0539	0.1504	0.0494	0.0374	0.0615	0.0533	0.0436	0.0589	0.0491	0.0616	0.0311	0.0551	0.041	0.0656	0.033	0.1523	0.1069	0.4528	0.0609	0.0516	0.0471	0.2121	0.0552	0.0515	0.0536
cg11748071	0.0231	0.0208	0.0227	0.0174	0.0203	0.0206	0.0262	0.0282	0.0224	0.0252	0.0317	0.028	0.0281	0.6157	0.0215	0.0268	0.0428	0.0191	0.0274	0.0275	0.0303	0.0316	0.0266	0.0289	0.0141	0.0221	0.0223	0.0168	0.015	0.0244	0.0217	0.0319	0.0283	0.0252	0.0328	0.0286	0.0223	0.025	0.0254	0.0287	0.5159	0.2698	0.0274	0.0194	0.0277	0.0342	0.0241	0.0474	0.0274
cg19219577	0.0346	0.0473	0.0328	0.0317	0.1585	0.2535	0.0417	0.0678	0.0449	0.0508	0.0363	0.0518	0.0533	0.0505	0.0379	0.0568	0.2606	0.0302	0.0348	0.0409	0.0337	0.0702	0.4093	0.0679	0.2096	0.0396	0.0414	0.036	0.0873	0.0414	0.0851	0.0513	0.0334	0.0569	0.0419	0.0841	0.0572	0.0584	0.0408	0.0435	0.0393	0.0374	0.0635	0.0434	0.0375	0.0539	0.0416	0.0435	0.0492
cg23671600	0.0166	0.0171	0.0186	0.0177	0.0144	0.0115	0.0209	0.0165	0.0164	0.0189	0.0145	0.0159	0.0178	0.0189	0.015	0.0198	0.0153	0.0148	0.0172	0.0183	0.019	0.0191	0.02	0.0184	0.0131	0.0147	0.0141	0.0159	0.0132	0.0197	0.0172	0.0185	0.0199	0.02	0.0193	0.022	0.0215	0.018	0.0148	0.0192	0.596	0.0156	0.0258	0.0143	0.0199	0.0193	0.0192	0.0178	0.0182
cg15278386	0.5571	0.9169	0.9258	0.3417	0.5014	0.8775	0.6219	0.3108	0.9198	0.8481	0.9633	0.8643	0.317	0.3305	0.3076	0.5507	0.9563	0.1049	0.6637	0.263	0.9072	0.7827	0.4438	0.9488	0.9053	0.5491	0.6579	0.7931	0.9266	0.5935	0.8635	0.5517	0.4911	0.6282	0.5372	0.8545	0.7279	0.6082	0.7591	0.2185	0.7691	0.2662	0.8679	0.5224	0.6531	0.5675	0.7045	0.4672	0.4598
cg25761626	0.3917	0.2937	0.1537	0.0298	0.3544	0.0606	0.0336	0.054	0.0433	0.1632	0.0704	0.0393	0.1293	0.8068	0.0617	0.0933	0.2612	0.3293	0.0546	0.1153	0.2364	0.1435	0.2896	0.222	0.0358	0.0996	0.1941	0.1468	0.18	0.0494	0.0282	0.0883	0.109	0.1487	0.293	0.0625	0.2147	0.0524	0.1411	0.3611	0.5277	0.4298	0.0596	0.0859	0.0752	0.1877	0.0982	0.2613	0.1519
cg05136169	0.6352	0.6673	0.7857	0.7962	0.5283	0.8281	0.6618	0.3874	0.8097	0.8502	0.4738	0.7344	0.6934	0.5319	0.6817	0.6066	0.8235	0.697	0.8135	0.7423	0.8344	0.6293	0.691	0.7447	0.7376	0.6317	0.722	0.6924	0.616	0.8462	0.7727	0.7741	0.7908	0.691	0.863	0.7872	0.6747	0.7058	0.6682	0.7004	0.7619	0.6901	0.7868	0.6334	0.7505	0.6426	0.7482	0.5839	0.479
cg10926113	0.0143	0.0183	0.0189	0.0131	0.0146	0.0155	0.0205	0.0206	0.0143	0.0212	0.0142	0.0174	0.0135	0.0148	0.0172	0.0178	0.0135	0.014	0.0161	0.0145	0.0206	0.0173	0.0179	0.0147	0.0164	0.0181	0.0153	0.0158	0.0135	0.0148	0.0147	0.0252	0.0221	0.0129	0.014	0.0202	0.0141	0.0146	0.0144	0.0149	0.0204	0.0149	0.0135	0.0139	0.0209	0.0237	0.0192	0.0217	0.0142
cg23032229	0.0607	0.0626	0.0525	0.045	0.0467	0.0496	0.0446	0.049	0.0576	0.053	0.0541	0.0422	0.0564	0.0429	0.0492	0.0871	0.0518	0.0349	0.0338	0.0536	0.0542	0.0597	0.0458	0.0579	0.0283	0.0435	0.0386	0.0481	0.0486	0.0598	0.0565	0.0475	0.0501	0.0596	0.0462	0.0548	0.0524	0.0678	0.0394	0.0392	0.0428	0.0517	0.0444	0.0539	0.0546	0.0454	0.0429	0.1113	0.0609
cg01945183	0.0313	0.0395	0.0331	0.0188	0.0962	0.0156	0.0266	0.041	0.0316	0.0157	0.042	0.0168	0.0398	0.0707	0.026	0.038	0.0679	0.0185	0.0233	0.0169	0.0197	0.0588	0.026	0.0428	0.0276	0.0436	0.0278	0.0366	0.0168	0.0208	0.0293	0.0206	0.0196	0.0172	0.0133	0.0444	0.0249	0.0335	0.0177	0.0225	0.4865	0.3146	0.0237	0.0252	0.0163	0.0242	0.0389	0.1253	0.0509
cg24311947	0.0213	0.0162	0.0184	0.1437	0.0147	0.0452	0.0224	0.0161	0.0151	0.0202	0.0145	0.015	0.0897	0.8915	0.0146	0.0172	0.018	0.0123	0.016	0.0154	0.0189	0.0151	0.0177	0.2705	0.0147	0.0125	0.0141	0.0523	0.0124	0.0211	0.0165	0.0226	0.0214	0.017	0.0137	0.0206	0.0158	0.0135	0.0137	0.0163	0.564	0.5619	0.0177	0.0121	0.0185	0.0189	0.0151	0.0157	0.0161
cg07386190	0.0278	0.044	0.0279	0.0291	0.0297	0.0499	0.1249	0.037	0.0303	0.0292	0.025	0.031	0.0321	0.4666	0.03	0.0347	0.1302	0.0295	0.0212	0.0311	0.0297	0.0351	0.0298	0.044	0.0274	0.029	0.0229	0.0238	0.0254	0.0367	0.1377	0.0346	0.0401	0.0333	0.0334	0.0284	0.0378	0.0316	0.0279	0.0466	0.3244	0.1807	0.0389	0.0228	0.0337	0.0357	0.0378	0.0479	0.0415
cg12172057	0.0623	0.3856	0.138	0.1082	0.0547	0.5237	0.1222	0.0961	0.0703	0.1038	0.1887	0.0733	0.0514	0.8534	0.0779	0.5637	0.1973	0.5051	0.0835	0.0652	0.4851	0.0939	0.4732	0.5354	0.0535	0.0675	0.0886	0.5074	0.0715	0.07	0.0702	0.1294	0.092	0.0574	0.5027	0.1674	0.0762	0.0743	0.0713	0.0765	0.6369	0.6267	0.0788	0.0612	0.1055	0.3946	0.164	0.0998	0.065
cg01663603	0.0168	0.0229	0.0295	0.0235	0.0294	0.016	0.0241	0.1057	0.0213	0.0274	0.019	0.0232	0.0337	0.9627	0.0194	0.0282	0.0183	0.4439	0.0209	0.2205	0.0195	0.0241	0.0224	0.0232	0.0149	0.0208	0.0237	0.0276	0.0203	0.0216	0.0224	0.0217	0.1345	0.0166	0.2521	0.0226	0.019	0.019	0.019	0.0234	0.7467	0.7451	0.0165	0.021	0.0224	0.023	0.0152	0.564	0.5261
cg22200289	0.0939	0.0796	0.0955	0.0601	0.0685	0.0749	0.0769	0.0692	0.0618	0.1032	0.086	0.0816	0.0766	0.5548	0.0779	0.0854	0.0727	0.06	0.0697	0.112	0.089	0.0931	0.1085	0.2086	0.1147	0.0764	0.0975	0.0681	0.087	0.0683	0.0384	0.0837	0.248	0.0668	0.0746	0.2294	0.0556	0.1672	0.0751	0.0459	0.4934	0.7378	0.0743	0.0616	0.101	0.0867	0.2087	0.1057	0.055
cg20911718	0.5035	0.6666	0.7309	0.5431	0.2864	0.7845	0.5579	0.2525	0.8531	0.6992	0.4217	0.4337	0.2696	0.1161	0.1957	0.4893	0.8728	0.1461	0.6855	0.3173	0.8301	0.7192	0.3915	0.6471	0.2534	0.3885	0.5864	0.4969	0.4879	0.3733	0.1923	0.5421	0.3976	0.4447	0.4359	0.6257	0.5937	0.523	0.5392	0.194	0.2595	0.1908	0.6674	0.3504	0.3752	0.4371	0.5053	0.2716	0.2701
cg27412987	0.0519	0.025	0.0231	0.0203	0.0213	0.0193	0.0292	0.0305	0.0263	0.0229	0.0177	0.0278	0.0265	0.0282	0.0267	0.0239	0.0171	0.0251	0.0228	0.0252	0.0225	0.0281	0.0272	0.029	0.044	0.0282	0.024	0.0195	0.026	0.038	0.028	0.0235	0.0215	0.0317	0.0225	0.0241	0.0321	0.0232	0.0233	0.0268	0.0222	0.017	0.0291	0.0183	0.0274	0.0289	0.0244	0.0326	0.026
cg01176826	0.3057	0.1655	0.1044	0.1166	0.0991	0.0871	0.0865	0.7841	0.2485	0.0824	0.0946	0.1372	0.1089	0.8906	0.0696	0.2189	0.1845	0.0884	0.1744	0.1348	0.0711	0.1804	0.0793	0.1379	0.2646	0.084	0.1091	0.1004	0.1678	0.1086	0.2076	0.0771	0.1078	0.1209	0.122	0.086	0.1035	0.1384	0.1448	0.1074	0.1072	0.8766	0.2012	0.0796	0.0732	0.1234	0.0995	0.0969	0.1756
cg21850069	0.0268	0.0351	0.0411	0.0327	0.0356	0.0258	0.0408	0.0459	0.0584	0.037	0.0361	0.035	0.0583	0.1056	0.0405	0.0451	0.0457	0.037	0.0301	0.0509	0.0453	0.0823	0.0406	0.0554	0.035	0.0332	0.0363	0.0419	0.024	0.0486	0.0536	0.0491	0.0475	0.0565	0.0348	0.0409	0.0399	0.0635	0.0354	0.0537	0.0469	0.0362	0.0737	0.0391	0.0384	0.0422	0.0408	0.0523	0.0671
cg14866907	0.0363	0.027	0.0235	0.0259	0.0201	0.0182	0.0239	0.0275	0.0244	0.027	0.0188	0.0225	0.034	0.0345	0.0402	0.0248	0.1761	0.0325	0.0234	0.0314	0.0232	0.033	0.0221	0.0328	0.109	0.0255	0.0246	0.0209	0.0193	0.0309	0.052	0.0208	0.021	0.0504	0.0396	0.0216	0.0283	0.0352	0.0228	0.03	0.3249	0.0227	0.0391	0.0208	0.0256	0.0238	0.02	0.0371	0.0366
cg07246225	0.0634	0.0381	0.0337	0.0376	0.0515	0.0368	0.033	0.048	0.0452	0.0491	0.0496	0.0332	0.1172	0.0448	0.033	0.0547	0.0489	0.0427	0.023	0.045	0.0364	0.0478	0.0561	0.0603	0.0315	0.0199	0.0269	0.0346	0.0351	0.0342	0.053	0.0345	0.047	0.077	0.0479	0.0383	0.0412	0.0613	0.0421	0.0398	0.046	0.0507	0.0448	0.0336	0.045	0.0453	0.0346	0.047	0.0465
cg23442853	0.5121	0.3865	0.1132	0.3115	0.5936	0.3024	0.6057	0.0922	0.6311	0.5438	0.5385	0.6803	0.6835	0.8008	0.4595	0.1122	0.5144	0.7597	0.1224	0.4778	0.39	0.5448	0.7112	0.2931	0.5758	0.419	0.2884	0.3146	0.0946	0.5304	0.838	0.5057	0.3722	0.5774	0.5777	0.4852	0.2747	0.468	0.1364	0.4491	0.6906	0.6418	0.4484	0.1609	0.254	0.3685	0.2582	0.4378	0.3511
cg07149772	0.1247	0.1206	0.0904	0.0913	0.1062	0.0968	0.1123	0.0568	0.2547	0.0756	0.1679	0.0784	0.2119	0.1177	0.0867	0.3291	0.1169	0.1119	0.0914	0.1489	0.0455	0.1383	0.0728	0.22	0.0483	0.0686	0.0717	0.0968	0.1447	0.1082	0.1133	0.0573	0.0737	0.2829	0.1423	0.0616	0.1523	0.3341	0.1357	0.113	0.621	0.8072	0.1814	0.1146	0.0716	0.0613	0.0856	0.0941	0.213
cg10844818	0.0196	0.0226	0.022	0.0173	0.0184	0.0133	0.023	0.0219	0.0177	0.0332	0.0197	0.0222	0.023	0.0349	0.0203	0.0229	0.0257	0.0181	0.0187	0.0233	0.0242	0.0203	0.0239	0.0257	0.0181	0.0237	0.0224	0.0253	0.0158	0.0217	0.0392	0.0215	0.0244	0.0229	0.0164	0.0229	0.0235	0.021	0.0159	0.025	0.0425	0.0192	0.0217	0.0178	0.0223	0.0242	0.0238	0.0264	0.0209
cg04283637	0.1393	0.0789	0.0548	0.0419	0.3895	0.0376	0.0823	0.0477	0.0645	0.1891	0.0835	0.0618	0.0481	0.572	0.0985	0.0586	0.0614	0.04	0.0786	0.044	0.0413	0.0736	0.0536	0.4816	0.217	0.091	0.0552	0.0584	0.0722	0.1603	0.6256	0.1437	0.1117	0.0569	0.1686	0.0608	0.0783	0.3132	0.0431	0.169	0.6568	0.7539	0.1878	0.0514	0.071	0.0872	0.3256	0.0642	0.3056
cg24960960	0.0196	0.0194	0.0177	0.0178	0.023	0.0161	0.0223	0.1887	0.0149	0.0209	0.1991	0.0267	0.0235	0.1629	0.02	0.0887	0.4137	0.0194	0.1442	0.024	0.1772	0.0254	0.0228	0.4645	0.0191	0.0213	0.0202	0.0135	0.0177	0.0266	0.016	0.0469	0.0213	0.5083	0.021	0.0344	0.0404	0.4793	0.0222	0.0249	0.2734	0.2403	0.0223	0.0116	0.0249	0.4475	0.0956	0.2046	0.0177
cg21924449	0.1643	0.3444	0.123	0.0517	0.3784	0.2277	0.3244	0.3976	0.3724	0.306	0.2679	0.071	0.1187	0.0535	0.0784	0.0689	0.7405	0.0499	0.0826	0.083	0.315	0.2789	0.0894	0.36	0.0529	0.0903	0.3175	0.0839	0.1019	0.3006	0.389	0.1153	0.0909	0.1008	0.0514	0.1055	0.1633	0.1787	0.0701	0.085	0.4284	0.1551	0.2135	0.0741	0.2272	0.434	0.3684	0.2555	0.1556
cg19584346	0.021	0.0214	0.0248	0.0174	0.0194	0.0205	0.0385	0.0293	0.0236	0.0241	0.1627	0.025	0.0276	0.0363	0.0235	0.0337	0.0688	0.0216	0.0174	0.0224	0.0208	0.0236	0.0234	0.0252	0.013	0.02	0.0202	0.0222	0.0162	0.0247	0.0328	0.0281	0.0278	0.0258	0.019	0.0252	0.0212	0.0337	0.0151	0.0266	0.2833	0.0319	0.0211	0.0214	0.024	0.0227	0.0216	0.0383	0.028
cg18133263	0.0692	0.0351	0.0598	0.0389	0.0328	0.0262	0.0327	0.0306	0.0311	0.0348	0.0388	0.0477	0.0356	0.0297	0.0242	0.0268	0.0333	0.0413	0.0317	0.0237	0.0513	0.0297	0.0482	0.0232	0.0124	0.0386	0.0388	0.022	0.0261	0.0196	0.0404	0.0316	0.0429	0.0326	0.0288	0.0372	0.0192	0.0477	0.0248	0.0366	0.0274	0.0323	0.0266	0.0241	0.0313	0.0385	0.0327	0.0426	0.036
cg02231052	0.1164	0.1078	0.0774	0.0734	0.0899	0.0756	0.0652	0.1359	0.1119	0.0711	0.0499	0.068	0.1456	0.0771	0.078	0.1027	0.1192	0.0813	0.0568	0.0754	0.0772	0.1049	0.0606	0.1244	0.114	0.0736	0.0759	0.0888	0.1254	0.0775	0.0744	0.0863	0.0752	0.2177	0.0955	0.0995	0.1129	0.1008	0.1135	0.075	0.0798	0.0644	0.1205	0.0987	0.0755	0.0773	0.0597	0.1488	0.095
cg06528803	0.778	0.9042	0.8691	0.7113	0.8277	0.839	0.9129	0.3399	0.9657	0.8077	0.7957	0.86	0.6659	0.4819	0.7058	0.6954	0.6789	0.6968	0.8892	0.6129	0.908	0.9175	0.6084	0.8852	0.9149	0.7326	0.8531	0.5781	0.9443	0.8383	0.9123	0.8535	0.6629	0.6535	0.4532	0.9057	0.8539	0.8835	0.8044	0.6604	0.86	0.4693	0.8947	0.5442	0.7452	0.7734	0.8363	0.5687	0.516
cg24374738	0.0131	0.0146	0.0167	0.0114	0.0117	0.0128	0.0151	0.017	0.0131	0.0149	0.0227	0.0161	0.0189	0.1387	0.0132	0.0157	0.0137	0.0132	0.0143	0.0118	0.0164	0.0149	0.0163	0.0154	0.0107	0.0163	0.0133	0.0163	0.0117	0.0118	0.0122	0.0181	0.0215	0.0131	0.0183	0.2426	0.0117	0.0124	0.0125	0.0144	0.5356	0.5341	0.0137	0.0111	0.0158	0.0789	0.0159	0.0583	0.0122
cg02121118	0.05	0.0408	0.0412	0.0241	0.032	0.0361	0.0505	0.0413	0.0469	0.0552	0.0404	0.0406	0.0572	0.2543	0.0408	0.0416	0.0322	0.2765	0.0333	0.0535	0.0488	0.044	0.0515	0.056	0.0366	0.0342	0.0479	0.028	0.0369	0.049	0.0556	0.059	0.0607	0.0509	0.0473	0.0659	0.0318	0.0528	0.0275	0.0468	0.0592	0.0797	0.0695	0.0266	0.0498	0.0629	0.0541	0.0369	0.0452
cg05146205	0.0451	0.033	0.049	0.0225	0.0322	0.0367	0.0397	0.0404	0.0592	0.0394	0.0701	0.0418	0.0395	0.0428	0.0349	0.0408	0.051	0.0385	0.0198	0.0432	0.0345	0.0489	0.039	0.0382	0.0148	0.0362	0.0283	0.0404	0.0602	0.0411	0.0371	0.0396	0.0464	0.0259	0.0257	0.042	0.034	0.0397	0.0335	0.0386	0.1018	0.0332	0.0545	0.0317	0.0416	0.0381	0.0382	0.0493	0.0453
cg15826810	0.6086	0.5332	0.4147	0.1754	0.5462	0.3037	0.2113	0.5606	0.0849	0.5339	0.4044	0.1648	0.4545	0.7161	0.3057	0.483	0.0716	0.6355	0.3661	0.3474	0.3142	0.5054	0.5237	0.4652	0.1141	0.3863	0.5104	0.6059	0.8079	0.2799	0.0952	0.4317	0.7053	0.2195	0.4616	0.4646	0.6209	0.1761	0.6484	0.5164	0.8448	0.8942	0.2735	0.463	0.251	0.3668	0.5299	0.7296	0.3538
cg10764762	0.5102	0.4917	0.253	0.3576	0.2227	0.5727	0.6783	0.2442	0.127	0.3334	0.7876	0.1658	0.5031	0.4454	0.2753	0.2089	0.7257	0.5124	0.2834	0.2944	0.3576	0.6019	0.4149	0.4815	0.1317	0.2339	0.274	0.4716	0.4759	0.2408	0.0843	0.175	0.4155	0.2322	0.4729	0.3248	0.2842	0.4715	0.2502	0.5648	0.9245	0.8101	0.2976	0.1906	0.121	0.3011	0.5639	0.5252	0.5168
cg20103938	0.1128	0.1489	0.1765	0.1297	0.1291	0.1475	0.1847	0.1683	0.1841	0.1946	0.1655	0.1153	0.1935	0.2736	0.1715	0.2314	0.1294	0.1238	0.1058	0.1496	0.1401	0.1907	0.2164	0.1446	0.0935	0.1166	0.1608	0.1249	0.149	0.1404	0.172	0.1751	0.1846	0.1814	0.1079	0.1825	0.1153	0.1622	0.1231	0.1716	0.2012	0.1048	0.1708	0.0907	0.2261	0.1539	0.1792	0.1389	0.1538
cg27483474	0.0595	0.0973	0.0575	0.0369	0.096	0.3071	0.126	0.0619	0.0425	0.0698	0.2206	0.05	0.0923	0.6871	0.0825	0.0315	0.2475	0.0454	0.0436	0.0415	0.0472	0.0378	0.06	0.2332	0.2503	0.0585	0.342	0.0664	0.0791	0.0518	0.0737	0.1039	0.0733	0.0619	0.1472	0.0574	0.3458	0.045	0.0413	0.0754	0.6579	0.0698	0.1244	0.0295	0.063	0.2092	0.3625	0.1654	0.0617
cg20927059	0.384	0.0424	0.057	0.0572	0.0568	0.0799	0.0855	0.0451	0.0674	0.073	0.0594	0.0499	0.0351	0.0431	0.0545	0.0538	0.4378	0.4125	0.0446	0.0261	0.0767	0.0594	0.0587	0.0551	0.0391	0.0719	0.052	0.0588	0.0453	0.0277	0.178	0.126	0.0614	0.0347	0.1476	0.0518	0.0258	0.0387	0.0357	0.0494	0.0994	0.0381	0.0459	0.0365	0.0563	0.0672	0.0735	0.0826	0.4874
cg02062003	0.0301	0.0494	0.052	0.0421	0.045	0.04	0.0575	0.0535	0.0805	0.0565	0.0449	0.04	0.0698	0.0619	0.0559	0.0526	0.059	0.0539	0.043	0.0461	0.0616	0.0624	0.044	0.0555	0.049	0.0334	0.0275	0.0475	0.0416	0.0552	0.0473	0.0483	0.045	0.0697	0.0532	0.0526	0.0949	0.0462	0.0432	0.0404	0.0698	0.0506	0.0575	0.039	0.0632	0.0509	0.0527	0.0436	0.0574
cg20981615	0.5726	0.5942	0.7797	0.705	0.2465	0.8997	0.3183	0.2505	0.2012	0.6863	0.3415	0.6433	0.2399	0.1699	0.0901	0.4173	0.6352	0.1261	0.3706	0.2055	0.9213	0.7876	0.2634	0.5066	0.5562	0.3663	0.7245	0.4615	0.7985	0.3791	0.1439	0.422	0.5173	0.4031	0.6052	0.5391	0.671	0.2377	0.5777	0.2369	0.643	0.2364	0.5614	0.1583	0.5994	0.4317	0.7323	0.606	0.2198
cg18766864	0.1767	0.2044	0.0592	0.0442	0.0425	0.1682	0.0655	0.0988	0.0466	0.101	0.2205	0.0474	0.0607	0.6379	0.078	0.048	0.1275	0.0323	0.06	0.0615	0.0467	0.0872	0.041	0.1654	0.06135	0.1076	0.1317	0.1295	0.091	0.0567	0.046	0.1236	0.1276	0.0532	0.1633	0.0313	0.1508	0.07	0.0687	0.0489	0.6469	0.702	0.1072	0.0203	0.0525	0.07	0.134	0.0896	0.0637
cg05059571	0.8659	0.8597	0.7623	0.852	0.8614	0.7312	0.732	0.613	0.8963	0.848	0.9271	0.816	0.8865	0.8563	0.7627	0.7861	0.5043	0.7745	0.8285	0.6803	0.6841	0.8679	0.6376	0.8951	0.9276	0.7448	0.8619	0.89	0.9206	0.7923	0.8843	0.8145	0.5891	0.9279	0.592	0.7351	0.8847	0.8378	0.9352	0.8611	0.8006	0.7753	0.8601	0.5541	0.5575	0.8367	0.7612	0.7341	0.7601
cg06778853	0.7448	0.4403	0.6177	0.1256	0.5282	0.2233	0.5948	0.2382	0.2044	0.3779	0.709	0.2998	0.5837	0.733	0.3965	0.2534	0.4556	0.5365	0.192	0.3217	0.2501	0.67	0.497	0.6612	0.3869	0.6149	0.5139	0.3534	0.3917	0.2696	0.4959	0.3561	0.3959	0.3882	0.4587	0.3126	0.5005	0.3639	0.4869	0.4659	0.855	0.7846	0.4205	0.0828	0.3374	0.6318	0.5812	0.6917	0.4202
cg07050493	0.9517	0.9091	0.9261	0.8546	0.8976	0.9498	0.8522	0.8364	0.9443	0.915	0.6331	0.9033	0.947	0.5735	0.8773	0.8823	0.9528	0.9109	0.8908	0.8858	0.9464	0.9	0.8857	0.9164	0.9002	0.8971	0.9037	0.8874	0.9136	0.9219	0.8317	0.9432	0.9547	0.8796	0.9524	0.9397	0.8978	0.9319	0.8918	0.8858	0.7517	0.8504	0.9285	0.892	0.9039	0.9217	0.9114	0.7281	0.6621
cg04879381	0.049	0.0371	0.0442	0.0306	0.0561	0.0701	0.064	0.0295	0.0536	0.0749	0.0648	0.0391	0.0601	0.5403	0.0403	0.045	0.1103	0.0402	0.045	0.0493	0.04	0.0548	0.0497	0.2752	0.0419	0.042	0.0332	0.0318	0.053	0.0514	0.066	0.0706	0.1135	0.054	0.0515	0.0602	0.0512	0.0669	0.036	0.0632	0.472	0.7438	0.0885	0.0417	0.056	0.0663	0.0506	0.0514	0.0697
cg19075208	0.026	0.0301	0.0211	0.0241	0.0214	0.0195	0.0217	0.0344	0.033	0.0222	0.0355	0.0226	0.0343	0.0343	0.0251	0.0492	0.0197	0.0226	0.0221	0.0336	0.0228	0.0454	0.0193	0.0387	0.0196	0.0219	0.0208	0.0233	0.022	0.0317	0.0392	0.0203	0.0229	0.0437	0.0214	0.0271	0.0379	0.0387	0.0249	0.0338	0.0217	0.0209	0.0329	0.0181	0.0231	0.0218	0.0301	0.0315	0.0433
cg03577153	0.0712	0.0462	0.0433	0.0544	0.0548	0.0498	0.056	0.0532	0.0604	0.0501	0.0626	0.0361	0.0645	0.0863	0.0536	0.071	0.0598	0.0435	0.0453	0.052	0.0509	0.0388	0.0608	0.0417	0.0444	0.0356	0.0456	0.072	0.0662	0.0363	0.073	0.0596	0.0539	0.0672	0.0621	0.066	0.0474	0.0579	0.0514	0.0491	0.1159	0.0584	0.0505	0.0917	0.0484	0.0639	0.0773	0.0653	0.0902
cg15828353	0.8541	0.8284	0.8277	0.8129	0.7982	0.6613	0.3061	0.6151	0.9268	0.8443	0.6094	0.4286	0.5114	0.1016	0.1384	0.6986	0.6512	0.1714	0.5691	0.2236	0.8918	0.7379	0.7604	0.8078	0.3422	0.6892	0.6004	0.7965	0.6978	0.8837	0.7835	0.8623	0.5617	0.2675	0.4325	0.6664	0.8944	0.9133	0.601	0.6334	0.5431	0.7135	0.9216	0.5309	0.4705	0.6069	0.7952	0.8693	0.4199
cg03217360	0.9261	0.8209	0.9337	0.9335	0.9454	0.9626	0.9109	0.7562	0.9042	0.7827	0.9387	0.9662	0.9408	0.9369	0.8927	0.8505	0.9357	0.9343	0.9542	0.9403	0.9399	0.923	0.9544	0.9375	0.8873	0.9275	0.9471	0.9333	0.9419	0.9424	0.9463	0.9246	0.932	0.943	0.9432	0.9046	0.9422	0.9404	0.9305	0.9077	0.9401	0.9384	0.9454	0.9195	0.9506	0.9395	0.9141	0.7105	0.9466
cg08209473	0.1464	0.046	0.0433	0.0218	0.1321	0.0398	0.0738	0.1418	0.0481	0.0601	0.1097	0.0338	0.1539	0.836	0.08	0.1036	0.3575	0.2974	0.0529	0.1338	0.0381	0.0846	0.1685	0.2933	0.0818	0.3126	0.0547	0.1248	0.1312	0.0561	0.1608	0.0851	0.1384	0.0249	0.06	0.0391	0.0588	0.0737	0.0579	0.1669	0.6623	0.5965	0.0468	0.0213	0.0404	0.1871	0.1291	0.2938	0.0373
cg07979316	0.0315	0.0369	0.0496	0.0408	0.069	0.0764	0.0454	0.0458	0.0406	0.0527	0.0704	0.0382	0.0421	0.0272	0.0387	0.0457	0.3314	0.0331	0.0333	0.0343	0.039	0.041	0.0527	0.1944	0.0254	0.0343	0.0297	0.0682	0.037	0.0347	0.1547	0.0908	0.0932	0.0305	0.0679	0.0402	0.0363	0.0394	0.0324	0.0399	0.5051	0.0347	0.0447	0.0253	0.0426	0.048	0.1197	0.0806	0.0589
cg01915791	0.0534	0.0377	0.0818	0.0419	0.053	0.0413	0.0637	0.0421	0.0293	0.0562	0.1574	0.0497	0.2091	0.0294	0.0521	0.0524	0.0354	0.0318	0.0481	0.0445	0.0461	0.1404	0.0871	0.1744	0.0639	0.036	0.043	0.0666	0.037	0.0486	0.0414	0.0721	0.0887	0.0377	0.1822	0.0858	0.0326	0.0571	0.0354	0.042	0.3932	0.1553	0.0404	0.0334	0.0608	0.0642	0.1169	0.1047	0.0447
cg11623036	0.033	0.022	0.017	0.011	0.0156	0.0131	0.0237	0.0224	0.0164	0.0212	0.0115	0.0172	0.0149	0.016	0.0212	0.0155	0.0144	0.014	0.0171	0.017	0.0168	0.0164	0.0179	0.0188	0.0199	0.0207	0.0189	0.0136	0.0179	0.0164	0.0178	0.0146	0.0161	0.0201	0.0115	0.0167	0.018	0.017	0.0136	0.0207	0.018	0.0316	0.0179	0.0153	0.0158	0.0193	0.0174	0.0222	0.0203
cg05289892	0.0442	0.0281	0.0156	0.0135	0.0183	0.0106	0.0178	0.0265	0.0176	0.0193	0.0114	0.0179	0.0191	0.9642	0.0212	0.0149	0.0159	0.0112	0.0162	0.0139	0.0183	0.0209	0.0156	0.02	0.0352	0.016	0.0184	0.0126	0.0227	0.0181	0.0146	0.0163	0.0169	0.0148	0.2621	0.0171	0.0157	0.0156	0.0116	0.0156	0.6277	0.2173	0.0169	0.0114	0.0156	0.0158	0.0233	0.0314	0.0138
cg22806557	0.0633	0.0539	0.0486	0.0496	0.046	0.0428	0.0435	0.0717	0.0817	0.0428	0.0368	0.0463	0.0632	0.0464	0.0402	0.0882	0.0368	0.045	0.037	0.0461	0.0526	0.0517	0.0462	0.0475	0.0288	0.0321	0.0353	0.0443	0.0417	0.0409	0.0365	0.0408	0.0337	0.0653	0.0357	0.0451	0.0465	0.0523	0.0374	0.0431	0.0466	0.0336	0.0454	0.0371	0.0457	0.0356	0.0408	0.0649	0.0509
cg15957004	0.6632	0.8118	0.8495	0.8005	0.5848	0.8641	0.7645	0.7444	0.8728	0.8729	0.6469	0.8115	0.4574	0.6175	0.7366	0.8038	0.8709	0.7504	0.8028	0.4299	0.866	0.7631	0.7786	0.8517	0.785	0.7461	0.8585	0.7679	0.8702	0.8483	0.8203	0.836	0.8556	0.8427	0.716	0.8792	0.8442	0.834	0.7006	0.6018	0.8656	0.8482	0.8312	0.8055	0.7763	0.8368	0.7984	0.7724	0.7543
cg06537680	0.0212	0.0145	0.0249	0.0229	0.0116	0.0088	0.0251	0.0163	0.0123	0.0364	0.0101	0.0139	0.0164	0.8247	0.0142	0.0136	0.0138	0.0176	0.0189	0.0127	0.0219	0.012	0.0187	0.0163	0.0104	0.0143	0.0134	0.0121	0.0105	0.0137	0.0128	0.0676	0.1811	0.012	0.051	0.0193	0.0473	0.0135	0.037	0.0135	0.5988	0.5494	0.0216	0.0095	0.0366	0.0261	0.0147	0.018	0.0139
cg04914105	0.0199	0.0479	0.0538	0.0368	0.0255	0.0521	0.065	0.0519	0.0417	0.1175	0.0656	0.0533	0.0485	0.0404	0.0529	0.0493	0.1281	0.0451	0.046	0.055	0.0597	0.0356	0.0703	0.0606	0.0379	0.037	0.0435	0.0786	0.044	0.0463	0.0632	0.0612	0.0615	0.0476	0.0384	0.0525	0.0392	0.0327	0.026	0.0355	0.4567	0.0519	0.0669	0.039	0.0459	0.0516	0.0777	0.0963	0.0383
cg20985162	0.0339	0.0415	0.0378	0.0173	0.0249	0.0229	0.0289	0.0529	0.0244	0.0589	0.0265	0.0232	0.0279	0.0232	0.0437	0.0182	0.0282	0.0233	0.0307	0.0234	0.0423	0.0201	0.0301	0.0339	0.0445	0.0258	0.0383	0.0259	0.031	0.0219	0.0271	0.0407	0.0423	0.0269	0.0164	0.0359	0.0251	0.028	0.0265	0.0238	0.1086	0.031	0.0217	0.0212	0.043	0.0357	0.0306	0.0539	0.0359
cg13698153	0.0639	0.0178	0.0302	0.017	0.0149	0.0193	0.0265	0.0643	0.0207	0.0278	0.0172	0.0238	0.0244	0.0309	0.028	0.0198	0.0177	0.0166	0.0214	0.0248	0.0288	0.0263	0.0336	0.0284	0.0292	0.0194	0.021	0.0155	0.0298	0.0302	0.0309	0.0238	0.0331	0.0268	0.015	0.0279	0.025	0.0225	0.0167	0.0286	0.0277	0.0262	0.0211	0.0132	0.0258	0.0338	0.0284	0.0273	0.0254
cg00841781	0.0284	0.022	0.026	0.0168	0.023	0.0144	0.0279	0.0358	0.0259	0.0245	0.0163	0.0235	0.0194	0.0422	0.0345	0.0345	0.0224	0.0184	0.0197	0.0207	0.0195	0.0352	0.0247	0.027	0.0237	0.0167	0.02	0.0177	0.0148	0.025	0.0248	0.0277	0.0301	0.0209	0.0198	0.0252	0.0239	0.0201	0.0165	0.0329	0.0333	0.0221	0.0265	0.0195	0.0205	0.0458	0.0216	0.0485	0.0321
cg19597031	0.0236	0.0348	0.0364	0.0293	0.0336	0.0295	0.0455	0.0472	0.0433	0.0302	0.0307	0.0316	0.0687	0.0408	0.033	0.0479	0.0361	0.0379	0.0313	0.0412	0.0294	0.0575	0.0393	0.0435	0.0274	0.0269	0.0284	0.0439	0.0284	0.0407	0.0469	0.0382	0.0446	0.0453	0.0454	0.0326	0.0452	0.0456	0.0276	0.041	0.0491	0.0422	0.0535	0.0302	0.0406	0.0393	0.0398	0.0443	0.0544
cg22297305	0.1247	0.12	0.1441	0.0551	0.0525	0.0777	0.1246	0.116	0.0836	0.1471	0.0836	0.0922	0.0878	0.5067	0.0935	0.0973	0.072	0.0598	0.0902	0.0717	0.1407	0.0714	0.1298	0.0977	0.0382	0.0886	0.0868	0.0699	0.0586	0.0876	0.0775	0.1167	0.1245	0.0805	0.0608	0.1138	0.0684	0.0508	0.0659	0.0903	0.5094	0.4486	0.0797	0.0556	0.1296	0.1463	0.1321	0.0992	0.0674
cg05990936	0.2474	0.0504	0.0777	0.0491	0.0572	0.0614	0.0678	0.0531	0.1104	0.0551	0.043	0.0646	0.0726	0.6155	0.0714	0.092	0.0515	0.05	0.0606	0.0607	0.0738	0.1006	0.1233	0.1125	0.0757	0.0679	0.0524	0.0501	0.0591	0.0734	0.1199	0.0686	0.0556	0.0756	0.0745	0.0703	0.0731	0.1173	0.0492	0.0579	0.5509	0.3255	0.0831	0.0428	0.0774	0.0605	0.0657	0.2	0.0594
cg00097790	0.4653	0.4263	0.4906	0.4581	0.3358	0.5589	0.3961	0.2952	0.4079	0.5178	0.3088	0.4046	0.3144	0.2703	0.2606	0.4627	0.5494	0.2694	0.4045	0.2259	0.502	0.3109	0.4332	0.3982	0.9663	0.391	0.4851	0.4466	0.4987	0.5338	0.521	0.4568	0.3997	0.5097	0.4252	0.4606	0.5271	0.5493	0.4401	0.3305	0.4226	0.3727	0.5281	0.3216	0.4721	0.5329	0.5479	0.4697	0.3695
cg22960185	0.0493	0.0432	0.0458	0.0451	0.0437	0.0416	0.0455	0.0302	0.0621	0.0467	0.0595	0.0377	0.0455	0.5905	0.0454	0.0748	0.0487	0.0366	0.079	0.0448	0.0448	0.0645	0.0422	0.0504	0.0295	0.0506	0.0398	0.0457	0.0897	0.062	0.0482	0.0426	0.0527	0.0582	0.0455	0.06	0.0509	0.0507	0.0486	0.0459	0.7372	0.6024	0.0433	0.0408	0.0425	0.0493	0.0423	0.0557	0.0643
cg25036284	0.2749	0.0188	0.0188	0.0109	0.5964	0.0559	0.1913	0.1089	0.0125	0.0177	0.4913	0.017	0.1794	0.9025	0.0266	0.017	0.3002	0.0135	0.0155	0.2827	0.0142	0.0141	0.3409	0.3128	0.011	0.2207	0.0145	0.1511	0.0347	0.3624	0.4461	0.2982	0.0196	0.17	0.2012	0.1084	0.0838	0.1721	0.0214	0.3844	0.5939	0.5523	0.0279	0.1159	0.3874	0.6217	0.3317	0.3728	0.0523
cg03875347	0.1982	0.0551	0.0536	0.0365	0.0395	0.04	0.0506	0.0542	0.0444	0.0677	0.0562	0.0524	0.0554	0.059	0.0544	0.0554	0.0504	0.0533	0.047	0.0559	0.0546	0.0532	0.0587	0.0398	0.0393	0.0528	0.048	0.046	0.0784	0.0511	0.0296	0.0576	0.0612	0.0476	0.0467	0.0573	0.0481	0.0508	0.0565	0.054	0.0678	0.0652	0.0646	0.0715	0.0543	0.0543	0.0631	0.0677	0.0586
cg04581018	0.2309	0.4854	0.5743	0.2432	0.5802	0.574	0.4045	0.7012	0.2063	0.4197	0.5237	0.5452	0.4982	0.8017	0.6388	0.2421	0.5591	0.35	0.2989	0.3079	0.522	0.2767	0.606	0.5596	0.4785	0.5102	0.5714	0.5045	0.5088	0.2605	0.5399	0.5454	0.5012	0.1794	0.3517	0.4658	0.3262	0.502	0.3855	0.2957	0.6923	0.4719	0.4725	0.1068	0.5524	0.2407	0.4675	0.5199	0.6101
cg04004578	0.0345	0.0224	0.025	0.0173	0.0242	0.0225	0.0208	0.0242	0.0229	0.023	0.0217	0.024	0.0257	0.0281	0.0272	0.0306	0.0207	0.0234	0.0213	0.0238	0.02	0.0264	0.0246	0.0258	0.023	0.0202	0.0182	0.017	0.0227	0.0216	0.0222	0.0236	0.0216	0.0287	0.0302	0.028	0.0216	0.0244	0.0173	0.0213	0.023	0.0187	0.0234	0.0186	0.0203	0.0215	0.0253	0.0337	0.0249
cg12183032	0.8887	0.864	0.7457	0.7854	0.8488	0.8391	0.872	0.7816	0.8156	0.825	0.8664	0.7039	0.7908	0.896	0.8226	0.8114	0.8967	0.8472	0.8259	0.7953	0.8525	0.8763	0.7467	0.8788	0.8693	0.7573	0.7807	0.8257	0.8644	0.8141	0.8799	0.8744	0.7974	0.8399	0.8119	0.7529	0.899	0.8739	0.8641	0.7227	0.9163	0.8758	0.8873	0.7787	0.7619	0.8428	0.8506	0.8033	0.8857
cg20113012	0.1184	0.0691	0.053	0.0337	0.102	0.216	0.1386	0.0516	0.0541	0.0847	0.188	0.0388	0.2539	0.0406	0.0699	0.0549	0.5679	0.1238	0.0484	0.0618	0.0407	0.1686	0.1566	0.342	0.0845	0.1443	0.0789	0.0802	0.1039	0.0391	0.0966	0.1623	0.2265	0.0303	0.1778	0.0942	0.0452	0.0469	0.0776	0.0932	0.578	0.1027	0.2467	0.0215	0.1151	0.1685	0.1187	0.2846	0.073
cg04480903	0.0246	0.0213	0.0195	0.0218	0.0129	0.0145	0.0173	0.6055	0.0202	0.0151	0.0119	0.0229	0.0168	0.0234	0.0186	0.0202	0.0136	0.0141	0.0258	0.0151	0.0148	0.0198	0.0156	0.0161	0.1237	0.0206	0.0215	0.0121	0.0215	0.023	0.0221	0.0171	0.0156	0.0225	0.0149	0.0181	0.016	0.016	0.0123	0.0168	0.0178	0.0143	0.0175	0.0122	0.0206	0.4975	0.0164	0.523	0.0291
cg08424930	0.32	0.4156	0.3902	0.3521	0.3047	0.3578	0.4746	0.4468	0.4344	0.3435	0.7061	0.43	0.4564	0.3874	0.5286	0.4728	0.4238	0.3669	0.3546	0.6558	0.4451	0.3175	0.4913	0.5263	0.3523	0.4346	0.4377	0.4344	0.3687	0.5418	0.605	0.4505	0.4398	0.5271	0.325	0.3717	0.4298	0.4954	0.4597	0.5091	0.3786	0.4159	0.3867	0.3977	0.5103	0.4212	0.3629	0.5364	0.6512
cg07903677	0.9384	0.2692	0.2672	0.1904	0.6258	0.1602	0.4688	0.1734	0.4457	0.4206	0.525	0.4523	0.6035	0.8476	0.2479	0.337	0.576	0.615	0.3502	0.2101	0.2798	0.5457	0.3771	0.6136	0.5055	0.4805	0.474	0.3286	0.3089	0.5051	0.2699	0.4585	0.4545	0.4754	0.3217	0.2475	0.3582	0.7075	0.2011	0.5237	0.788	0.7245	0.5062	0.0781	0.2661	0.6389	0.4934	0.5049	0.5258
cg19806642	0.2545	0.5025	0.568	0.6105	0.0188	0.619	0.2996	0.6366	0.8694	0.209	0.7195	0.6135	0.0292	0.0208	0.5867	0.033	0.617	0.0181	0.3151	0.6436	0.6421	0.0817	0.7365	0.2776	0.4718	0.6069	0.365	0.5516	0.0291	0.2228	0.8615	0.4978	0.0316	0.7735	0.0145	0.0553	0.5064	0.7006	0.3264	0.5745	0.0356	0.021	0.4258	0.251	0.462	0.3513	0.0254	0.4007	0.3939
cg08514419	0.7207	0.565	0.6781	0.3664	0.5437	0.8421	0.5673	0.2091	0.3157	0.8032	0.4518	0.6147	0.4907	0.1371	0.444	0.4547	0.877	0.4704	0.4434	0.2485	0.5456	0.5919	0.5278	0.6753	0.6095	0.5331	0.7031	0.4653	0.7828	0.8541	0.5206	0.5991	0.484	0.289	0.6082	0.4766	0.4798	0.8783	0.6138	0.5941	0.8674	0.5236	0.8148	0.2852	0.4045	0.817	0.63	0.4291	0.5367
cg19478381	0.069	0.0568	0.0588	0.0338	0.0518	0.0412	0.0635	0.0627	0.2408	0.0483	0.0557	0.0448	0.0576	0.0488	0.096	0.0624	0.0575	0.0338	0.0423	0.0518	0.0412	0.0659	0.043	0.0745	0.0343	0.038	0.0388	0.0603	0.0436	0.0453	0.047	0.0423	0.0461	0.0756	0.0507	0.0452	0.0515	0.078	0.0388	0.0493	0.0505	0.0383	0.0807	0.0408	0.0422	0.0582	0.1204	0.0788	0.0921
cg26028810	0.0313	0.0523	0.0443	0.0379	0.0354	0.0436	0.0507	0.0445	0.0411	0.1265	0.0821	0.0416	0.0665	0.4576	0.0418	0.0385	0.0666	0.0607	0.045	0.0473	0.0508	0.0438	0.0482	0.0662	0.034	0.0585	0.0444	0.0544	0.0304	0.0432	0.0566	0.0507	0.0513	0.0578	0.2418	0.0528	0.0513	0.0325	0.0366	0.0482	0.1023	0.0685	0.0449	0.0424	0.0492	0.0983	0.0648	0.2096	0.0431
cg12677723	0.4165	0.516	0.5021	0.3465	0.4188	0.3738	0.3595	0.2547	0.4332	0.3274	0.344	0.383	0.3168	0.2003	0.2572	0.3846	0.2789	0.1527	0.3876	0.2131	0.4477	0.3254	0.314	0.3823	0.3333	0.4235	0.4733	0.3957	0.6364	0.4044	0.4288	0.4807	0.3704	0.3235	0.3087	0.5041	0.4345	0.4058	0.3782	0.3102	0.5414	0.4792	0.494	0.2533	0.3093	0.5125	0.5613	0.2795	0.2842
cg15081886	0.5202	0.674	0.8433	0.3818	0.725	0.5711	0.6324	0.3411	0.829	0.5614	0.4565	0.5778	0.5726	0.3955	0.5683	0.628	0.5194	0.5059	0.807	0.4914	0.807	0.834	0.6493	0.7667	0.802	0.6997	0.6275	0.4153	0.8372	0.7571	0.6952	0.6548	0.7211	0.6177	0.7511	0.8409	0.7609	0.8074	0.7383	0.4315	0.5343	0.4321	0.6793	0.6908	0.6278	0.6289	0.6921	0.4387	0.3752
cg27150412	0.3745	0.3386	0.5574	0.3288	0.2198	0.6011	0.3389	0.2106	0.485	0.6461	0.2505	0.3445	0.2373	0.1341	0.186	0.3442	0.2527	0.1583	0.4362	0.2221	0.6913	0.5589	0.3442	0.323	0.2011	0.399	0.4588	0.3537	0.5979	0.4663	0.2957	0.5097	0.5515	0.2623	0.5512	0.4958	0.4705	0.6022	0.3604	0.276	0.4536	0.4424	0.504	0.2404	0.3413	0.3668	0.5265	0.3294	0.221
cg11859953	0.0498	0.0378	0.0401	0.0291	0.0322	0.0277	0.0296	0.0531	0.0308	0.0352	0.0389	0.0289	0.0355	0.0395	0.0303	0.052	0.0445	0.0333	0.0326	0.0332	0.043	0.065	0.0422	0.0423	0.0314	0.0258	0.0418	0.0333	0.039	0.0359	0.0431	0.0344	0.0404	0.0608	0.0299	0.0513	0.0349	0.0321	0.0322	0.0314	0.0409	0.0308	0.0405	0.0345	0.0444	0.0433	0.0334	0.0457	0.0814
cg16914272	0.1877	0.113	0.0548	0.0471	0.0977	0.0527	0.0684	0.0749	0.1381	0.0538	0.0594	0.0527	0.1689	0.0426	0.0902	0.1195	0.1167	0.0434	0.0621	0.0724	0.0445	0.0677	0.0471	0.096	0.0305	0.0513	0.0449	0.0502	0.068	0.0668	0.123	0.0683	0.0618	0.0751	0.0688	0.0579	0.0625	0.0904	0.0733	0.0753	0.0679	0.0503	0.0722	0.0439	0.0604	0.0701	0.0528	0.1099	0.1397
cg00253564	0.5366	0.7801	0.7215	0.6801	0.7167	0.7763	0.7099	0.6049	0.8525	0.7559	0.4974	0.6384	0.561	0.4324	0.6737	0.5198	0.67	0.4522	0.7457	0.5008	0.588	0.7269	0.6313	0.7818	0.6638	0.5939	0.716	0.7362	0.7646	0.7304	0.7196	0.6501	0.6259	0.6928	0.4894	0.7413	0.6998	0.8387	0.7014	0.6099	0.8205	0.4967	0.8047	0.7847	0.5644	0.7739	0.7055	0.64	0.5695
cg05904889	0.0571	0.0379	0.0451	0.0693	0.0431	0.0314	0.0771	0.045	0.0472	0.0356	0.0481	0.04	0.0698	0.0908	0.0512	0.0555	0.0325	0.0323	0.0582	0.0555	0.0519	0.0798	0.0513	0.0647	0.0351	0.0439	0.0343	0.0435	0.0474	0.0498	0.0669	0.0393	0.052	0.0603	0.0383	0.0577	0.0555	0.0523	0.0369	0.0536	0.4015	0.0331	0.0567	0.0504	0.0437	0.0396	0.0481	0.0486	0.0808
cg17686885	0.0744	0.1163	0.0814	0.041	0.0425	0.092	0.119	0.0494	0.3778	0.0997	0.3875	0.0369	0.3098	0.8436	0.0413	0.0794	0.0857	0.3007	0.099	0.1023	0.0662	0.1307	0.1549	0.5064	0.0298	0.0762	0.0768	0.1086	0.184	0.0439	0.0309	0.1023	0.1172	0.046	0.2992	0.1183	0.042	0.1564	0.068	0.1253	0.773	0.8283	0.166	0.035	0.0597	0.4144	0.1479	0.1166	0.1122
cg13971571	0.1122	0.0719	0.0652	0.0681	0.0597	0.0656	0.097	0.0757	0.0661	0.1106	0.0759	0.0538	0.0748	0.1262	0.0908	0.0646	0.1743	0.0594	0.0829	0.062	0.0823	0.0618	0.08	0.0607	0.0717	0.071	0.0734	0.0603	0.0625	0.0653	0.0637	0.1124	0.0936	0.0646	0.0656	0.099	0.0556	0.0523	0.0552	0.0624	0.1296	0.0736	0.0795	0.0618	0.1015	0.099	0.0873	0.0896	0.2068
cg05722552	0.0384	0.0341	0.0287	0.0236	0.0277	0.0183	0.0282	0.0252	0.0303	0.0309	0.043	0.0219	0.0455	0.0334	0.023	0.0298	0.0294	0.024	0.0177	0.0352	0.0292	0.0491	0.0289	0.0372	0.0379	0.0172	0.0209	0.022	0.0364	0.0326	0.0334	0.0215	0.0413	0.0419	0.0251	0.0255	0.0337	0.0342	0.0357	0.0269	0.0222	0.0208	0.0358	0.0207	0.0262	0.0248	0.0248	0.0316	0.0354
cg24608385	0.0313	0.035	0.0399	0.0253	0.0264	0.0277	0.0465	0.0342	0.0504	0.0372	0.0435	0.0377	0.043	0.0417	0.0332	0.0339	0.0581	0.0311	0.0375	0.0382	0.0407	0.0395	0.0341	0.0552	0.026	0.0319	0.0405	0.0436	0.0229	0.0381	0.0479	0.0423	0.0411	0.0426	0.0296	0.0373	0.0344	0.0467	0.0251	0.036	0.0517	0.0491	0.0381	0.0341	0.0361	0.0373	0.037	0.0558	0.0391
cg23089549	0.0619	0.0733	0.0518	0.0629	0.0695	0.0662	0.0543	0.5317	0.0918	0.072	0.4438	0.0696	0.14	0.1983	0.6109	0.0789	0.1075	0.0507	0.0506	0.0614	0.1428	0.1012	0.4545	0.1321	0.12222	0.0687	0.0675	0.0619	0.0946	0.0637	0.0629	0.0617	0.0631	0.09	0.0709	0.0619	0.0712	0.0611	0.2045	0.0627	0.0506	0.2322	0.0908	0.0514	0.0505	0.0721	0.0607	0.1258	0.082
cg12163448	0.0666	0.0515	0.0516	0.0466	0.0468	0.0373	0.0366	0.0646	0.0702	0.0473	0.0504	0.0368	0.0419	0.0496	0.0463	0.0644	0.0442	0.048	0.0353	0.0438	0.0451	0.0493	0.0443	0.0652	0.0227	0.0361	0.0412	0.038	0.0613	0.0537	0.0504	0.0466	0.0449	0.0765	0.0617	0.0521	0.0547	0.0499	0.0459	0.0375	0.057	0.0529	0.053	0.0456	0.0498	0.0497	0.0409	0.0596	0.0379
cg11089837	0.0981	0.0811	0.0677	0.0711	0.1074	0.0859	0.073	0.1661	0.22	0.0755	0.0866	0.0408	0.1552	0.1377	0.0599	0.1615	0.1633	0.0972	0.0565	0.1834	0.0759	0.1043	0.0714	0.1253	0.0776	0.0454	0.0529	0.1125	0.2629	0.0963	0.0809	0.0969	0.0694	0.1366	0.0814	0.0859	0.096	0.1027	0.0854	0.0797	0.0715	0.1181	0.144	0.2156	0.0989	0.0733	0.0691	0.0789	0.1693
cg02838178	0.039	0.1362	0.0426	0.0388	0.0513	0.2157	0.0656	0.0585	0.0828	0.2191	0.2363	0.03	0.0421	0.2133	0.0327	0.0683	0.1177	0.0317	0.0777	0.053	0.0506	0.0744	0.0651	0.1206	0.038	0.0354	0.0422	0.0463	0.0373	0.0606	0.1202	0.0537	0.0502	0.045	0.0294	0.1055	0.3232	0.057	0.2125	0.0426	0.479	0.2087	0.4279	0.032	0.047	0.045	0.0485	0.1997	0.0466
cg23647143	0.1006	0.2707	0.3363	0.1705	0.0749	0.0847	0.1565	0.1807	0.3541	0.5454	0.2308	0.1115	0.0915	0.1894	0.3188	0.078	0.93	0.6234	0.098	0.1198	0.3507	0.1058	0.0823	0.7224	0.175	0.4296	0.1102	0.1105	0.1474	0.2029	0.2382	0.5342	0.0801	0.0945	0.1631	0.071	0.4053	0.2676	0.1168	0.267	0.919	0.8556	0.6906	0.072	0.0728	0.4819	0.1881	0.4082	0.3124
cg27282530	0.0495	0.1202	0.0824	0.054	0.0619	0.0721	0.0692	0.1229	0.0761	0.1051	0.0603	0.0777	0.3854	0.8104	0.1145	0.042	0.1976	0.6763	0.1065	0.1391	0.1091	0.0814	0.1158	0.0775	0.0968	0.2355	0.0922	0.088	0.0589	0.1949	0.1291	0.1223	0.1649	0.0789	0.4138	0.0738	0.0747	0.0958	0.1122	0.1433	0.6057	0.519	0.0695	0.0521	0.0954	0.0928	0.0942	0.0874	0.0993
cg10813183	0.8887	0.8449	0.8497	0.8206	0.631	0.8552	0.7532	0.446	0.7356	0.8468	0.7032	0.7626	0.5524	0.2888	0.4467	0.5425	0.637	0.6379	0.7413	0.4627	0.8497	0.8181	0.7149	0.8761	0.8163	0.5384	0.8208	0.6226	0.842	0.8485	0.4598	0.8118	0.6793	0.8464	0.8099	0.8342	0.8369	0.7482	0.773	0.7888	0.7053	0.7308	0.8462	0.5867	0.7739	0.7883	0.8283	0.6668	0.5697
cg12890694	0.091	0.15	0.1675	0.189	0.1341	0.4217	0.1665	0.1212	0.1546	0.2316	0.3637	0.109	0.5444	0.8759	0.3259	0.165	0.2822	0.2791	0.0962	0.202	0.1574	0.1307	0.1464	0.2393	0.1272	0.1018	0.1507	0.2605	0.305	0.1491	0.1499	0.3328	0.1483	0.1267	0.2063	0.1419	0.1304	0.2126	0.1219	0.1351	0.8429	0.7282	0.2989	0.1544	0.1268	0.2085	0.4055	0.2194	0.6621
cg25560363	0.0238	0.0284	0.0286	0.0256	0.0244	0.03	0.0306	0.0279	0.0221	0.0362	0.0302	0.0272	0.0279	0.0289	0.0239	0.0293	0.023	0.0267	0.0236	0.0264	0.0322	0.0275	0.0313	0.0266	0.0254	0.025	0.027	0.0281	0.0233	0.0302	0.0257	0.0332	0.0331	0.0283	0.0222	0.0366	0.0263	0.0262	0.0256	0.0263	0.0319	0.0263	0.0284	0.0225	0.0275	0.0319	0.034	0.0274	0.031
cg23416667	0.0115	0.0166	0.0143	0.0189	0.011	0.0099	0.0154	0.0147	0.0106	0.0156	0.0106	0.016	0.0118	0.0114	0.0159	0.0149	0.0128	0.0116	0.0141	0.0127	0.0143	0.0113	0.0143	0.0114	0.011	0.0123	0.0146	0.0115	0.0113	0.0121	0.0127	0.0151	0.0162	0.011	0.0105	0.0133	0.0112	0.0117	0.0121	0.0127	0.0163	0.0121	0.0119	0.0112	0.0156	0.0167	0.0211	0.0167	0.0117
cg09854775	0.0453	0.0389	0.0561	0.0472	0.0454	0.0565	0.0454	0.0381	0.0701	0.0458	0.051	0.0352	0.0628	0.0701	0.032	0.0791	0.0435	0.0426	0.0425	0.0777	0.0501	0.1301	0.0385	0.0734	0.0447	0.0478	0.0349	0.0409	0.0662	0.074	0.0748	0.0804	0.0579	0.0968	0.0492	0.044	0.0832	0.0689	0.0529	0.0524	0.0489	0.0521	0.0675	0.0476	0.0443	0.0465	0.0415	0.0342	0.0634
cg01519714	0.015	0.0158	0.0177	0.0115	0.0146	0.0137	0.0145	0.0156	0.0126	0.0196	0.0141	0.0161	0.0146	0.0145	0.0154	0.0183	0.0119	0.0141	0.0147	0.0132	0.0173	0.0154	0.0174	0.0148	0.0117	0.0134	0.0131	0.0146	0.0123	0.0155	0.0139	0.0192	0.016	0.0157	0.0141	0.0206	0.0158	0.0154	0.0134	0.0143	0.0191	0.0125	0.0155	0.0129	0.0151	0.0168	0.0154	0.0155	0.0154
cg06594770	0.0566	0.067	0.0583	0.0443	0.1781	0.0598	0.089	0.0818	0.0591	0.0964	0.0763	0.0689	0.0706	0.541	0.0604	0.0736	0.0513	0.0375	0.0645	0.057	0.0875	0.0835	0.0736	0.0498	0.0324	0.1104	0.0688	0.0929	0.0547	0.0377	0.0554	0.0797	0.0886	0.0388	0.0545	0.0821	0.0502	0.0545	0.0744	0.0988	0.5266	0.6533	0.0673	0.047	0.1357	0.0799	0.0773	0.0664	0.0595
cg03071209	0.0744	0.023	0.0335	0.018	0.0131	0.0155	0.0226	0.0229	0.024	0.0176	0.0179	0.0266	0.0193	0.017	0.02	0.0275	0.0213	0.0144	0.0214	0.0149	0.0298	0.0267	0.0183	0.0238	0.02024	0.0193	0.019	0.0126	0.0248	0.021	0.0169	0.026	0.0173	0.0242	0.0149	0.024	0.0244	0.0194	0.0132	0.0213	0.0147	0.019	0.0174	0.0155	0.0139	0.023	0.0255	0.0221	0.0234
cg07492770	0.0313	0.0597	0.0579	0.0359	0.0352	0.0386	0.0643	0.0659	0.0415	0.0566	0.0272	0.0442	0.2541	0.3881	0.0582	0.0547	0.0312	0.0315	0.0438	0.0355	0.0458	0.0355	0.0715	0.0523	0.0312	0.0467	0.0458	0.0527	0.0409	0.0279	0.0327	0.0499	0.0563	0.0325	0.0373	0.0906	0.0271	0.0303	0.0385	0.0326	0.1133	0.049	0.0364	0.0284	0.0599	0.0653	0.0521	0.063	0.0383
cg27309542	0.0216	0.0168	0.0123	0.0118	0.0113	0.0107	0.0146	0.184	0.0126	0.0198	0.0111	0.0161	0.0112	0.4085	0.0163	0.0113	0.0122	0.0104	0.0147	0.0115	0.0133	0.0147	0.19	0.0224	0.0839	0.0136	0.0159	0.0105	0.0169	0.0129	0.2612	0.0156	0.0212	0.6768	0.0124	0.0175	0.0141	0.0109	0.0116	0.0111	0.0158	0.2061	0.0127	0.0089	0.0148	0.5254	0.028	0.0225	0.0137
cg26472636	0.0807	0.0914	0.0371	0.0355	0.0745	0.0358	0.0419	0.1154	0.0405	0.0504	0.2517	0.0348	0.0459	0.718	0.0481	0.0648	0.6826	0.0649	0.2015	0.0343	0.2192	0.0407	0.0376	0.6557	0.0531	0.0393	0.0474	0.0329	0.0261	0.0419	0.0416	0.0916	0.0376	0.693	0.0519	0.0718	0.5196	0.7238	0.0452	0.0335	0.8162	0.4958	0.047	0.0267	0.0396	0.6105	0.1354	0.2103	0.0465
cg16571983	0.0111	0.0162	0.0132	0.0112	0.0127	0.0096	0.0137	0.0161	0.013	0.0177	0.0112	0.0142	0.0147	0.014	0.0178	0.0144	0.0121	0.0121	0.0217	0.0123	0.0174	0.0253	0.0147	0.0128	0.0097	0.0135	0.0135	0.0128	0.011	0.0122	0.0122	0.0196	0.018	0.0148	0.0247	0.0154	0.0119	0.0125	0.013	0.0126	0.0897	0.0122	0.0129	0.0139	0.0156	0.0152	0.0132	0.0169	0.0163
cg09786257	0.2171	0.2618	0.3913	0.3411	0.1132	0.5857	0.1213	0.0652	0.2049	0.1373	0.1334	0.2228	0.084	0.0675	0.0527	0.145	0.0585	0.054	0.2456	0.0547	0.2466	0.2271	0.2049	0.3127	0.053	0.1167	0.2049	0.1328	0.1732	0.0848	0.0977	0.1702	0.1356	0.0916	0.071	0.4979	0.4177	0.7122	0.1252	0.0817	0.1118	0.0701	0.1156	0.0655	0.1303	0.1094	0.1485	0.1067	0.0734
cg23651808	0.0735	0.1174	0.0349	0.0779	0.0542	0.0942	0.0505	0.1702	0.0641	0.1124	0.3774	0.0491	0.1096	0.0648	0.0938	0.0914	0.0965	0.0931	0.0902	0.0799	0.0322	0.0449	0.1192	0.0665	0.033	0.109	0.0973	0.1821	0.0382	0.1086	0.1361	0.147	0.247	0.0694	0.1507	0.0271	0.0547	0.0554	0.1163	0.062	0.6689	0.529	0.0834	0.049	0.1618	0.0545	0.1478	0.1883	0.1063
cg00400733	0.1025	0.1117	0.1004	0.0628	0.0798	0.0727	0.144	0.0756	0.0536	0.1292	0.0947	0.0745	0.0685	0.7382	0.0579	0.0821	0.0882	0.0792	0.1172	0.0777	0.1219	0.1422	0.1162	0.1057	0.2872	0.0887	0.1073	0.1028	0.075	0.0774	0.059	0.0991	0.1164	0.0593	0.0539	0.1495	0.0915	0.0589	0.1029	0.0712	0.6891	0.5438	0.1018	0.0571	0.1011	0.1327	0.1532	0.0621	0.0651
cg03570417	0.0669	0.0925	0.0945	0.0503	0.0911	0.1712	0.0764	0.0464	0.1024	0.1704	0.2087	0.067	0.0538	0.1475	0.0953	0.0599	0.2593	0.0835	0.0729	0.0854	0.0926	0.1294	0.0911	0.1431	0.2924	0.0975	0.1324	0.1346	0.1406	0.087	0.1577	0.1105	0.1512	0.0649	0.0726	0.1029	0.0815	0.0711	0.0649	0.0469	0.1633	0.0974	0.1553	0.0605	0.1514	0.1107	0.1976	0.0951	0.0629
cg15905579	0.0484	0.1061	0.0637	0.0313	0.0258	0.0365	0.0404	0.0915	0.0212	0.0671	0.0322	0.0338	0.0824	0.0945	0.025	0.025	0.2418	0.0587	0.0234	0.0384	0.0848	0.0357	0.408	0.1267	0.0631	0.0344	0.0385	0.0212	0.0193	0.0533	0.0711	0.0579	0.0745	0.0659	0.0239	0.0563	0.0559	0.0394	0.0368	0.0476	0.6418	0.5734	0.0509	0.0428	0.0603	0.0591	0.0231	0.0753	0.0672
cg01561271	0.0357	0.0279	0.0376	0.0302	0.0423	0.0347	0.0403	0.0312	0.0444	0.0424	0.0337	0.0312	0.0638	0.0498	0.0322	0.0361	0.2654	0.0619	0.0215	0.0448	0.043	0.053	0.0449	0.1518	0.0353	0.0269	0.0282	0.0333	0.0294	0.0365	0.0423	0.0483	0.0445	0.0629	0.0429	0.0328	0.0747	0.048	0.0283	0.0412	0.4118	0.1788	0.0456	0.0232	0.0372	0.0637	0.0385	0.0357	0.0401
cg10747115	0.0202	0.0287	0.0308	0.0201	0.0168	0.024	0.0305	0.033	0.0286	0.0302	0.0893	0.0271	0.0251	0.022	0.0238	0.0435	0.0246	0.021	0.0276	0.0271	0.0276	0.0255	0.024	0.0281	0.021	0.0283	0.0285	0.0212	0.0211	0.0316	0.0343	0.0314	0.0309	0.0241	0.0183	0.0322	0.0251	0.023	0.0244	0.0263	0.0458	0.0214	0.0321	0.017	0.0263	0.0291	0.0315	0.0305	0.0277
cg05300045	0.8766	0.874	0.9203	0.4376	0.7454	0.9126	0.7435	0.2884	0.9367	0.8197	0.4623	0.9072	0.5081	0.8871	0.5493	0.6338	0.6779	0.5882	0.4964	0.3933	0.9547	0.8418	0.7937	0.8984	0.8401	0.8824	0.8675	0.6382	0.8932	0.886	0.9011	0.8651	0.7692	0.8568	0.4966	0.8538	0.9009	0.8823	0.6884	0.8941	0.9168	0.9194	0.9172	0.6077	0.7721	0.9258	0.9067	0.7858	0.4871
cg25644243	0.417	0.5316	0.0254	0.6544	0.1418	0.2313	0.4776	0.3838	0.0702	0.017	0.3822	0.0288	0.1483	0.8685	0.0169	0.0247	0.3705	0.1997	0.0622	0.6204	0.0175	0.555	0.1666	0.1756	0.0171	0.5604	0.015	0.4384	0.0158	0.4859	0.1812	0.1873	0.3742	0.0653	0.0162	0.0832	0.1498	0.3793	0.2738	0.6023	0.5384	0.6211	0.05	0.5324	0.0247	0.4029	0.1149	0.3878	0.3348
cg15882762	0.9037	0.8531	0.8749	0.8482	0.8561	0.8752	0.845	0.8459	0.8749	0.8343	0.8508	0.8117	0.8628	0.8985	0.865	0.8901	0.8463	0.85	0.8049	0.8759	0.8621	0.9002	0.7545	0.8984	0.8639	0.8169	0.8438	0.852	0.8916	0.8754	0.8984	0.867	0.8534	0.9223	0.8411	0.8776	0.9079	0.9158	0.8458	0.8604	0.872	0.8448	0.876	0.8452	0.844	0.8646	0.8625	0.8404	0.895
cg04197086	0.5077	0.3441	0.1701	0.1583	0.2689	0.6858	0.1384	0.9015	0.1382	0.4929	0.4484	0.1685	0.6669	0.9879	0.0734	0.377	0.2085	0.9749	0.3846	0.9374	0.2467	0.3883	0.5122	0.3141	0.227	0.521	0.2887	0.8581	0.5693	0.3911	0.1001	0.3272	0.6757	0.2229	0.9123	0.3733	0.6758	0.4439	0.6582	0.6049	0.9603	0.9713	0.3544	0.9448	0.2209	0.5219	0.4768	0.6821	0.661
cg05826823	0.7338	0.7012	0.7554	0.5784	0.7839	0.7743	0.8052	0.5541	0.8498	0.7675	0.4619	0.7351	0.6858	0.4907	0.6727	0.5696	0.811	0.6862	0.7114	0.6958	0.8449	0.6695	0.6952	0.776	0.8122	0.5212	0.7281	0.7688	0.6798	0.7377	0.8138	0.724	0.6767	0.7714	0.4601	0.7836	0.64	0.8578	0.6519	0.6672	0.8692	0.8156	0.8075	0.7553	0.5707	0.7756	0.7847	0.771	0.4492
cg06337239	0.0986	0.0569	0.0506	0.0644	0.0492	0.0563	0.0706	0.1149	0.0872	0.0474	0.0769	0.0377	0.0654	0.1036	0.0506	0.0831	0.052	0.0512	0.0467	0.064	0.0392	0.0837	0.0572	0.0819	0.125	0.0414	0.037	0.0626	0.0672	0.0654	0.0599	0.0591	0.0562	0.1536	0.0618	0.0477	0.0926	0.0611	0.0819	0.0428	0.0644	0.07	0.1245	0.0492	0.0437	0.0511	0.0401	0.0596	0.0833
cg13025668	0.0622	0.3636	0.1082	0.0511	0.2793	0.516	0.0839	0.4568	0.0191	0.1453	0.4964	0.0805	0.0477	0.8134	0.0432	0.0599	0.1316	0.1111	0.0459	0.0637	0.1391	0.0728	0.0863	0.4543	0.0756	0.0398	0.0917	0.076	0.0837	0.0319	0.1056	0.1501	0.266	0.1384	0.0915	0.473	0.218	0.1668	0.0928	0.0572	0.5531	0.5167	0.4526	0.0812	0.1425	0.2801	0.1823	0.1269	0.0269
cg04994773	0.0179	0.0251	0.0266	0.018	0.0172	0.0233	0.0301	0.0289	0.0176	0.0272	0.0425	0.0269	0.0187	0.0227	0.0271	0.0256	0.0402	0.0148	0.0197	0.0243	0.024	0.0195	0.0296	0.0256	0.0163	0.0241	0.02	0.0177	0.0166	0.0178	0.0187	0.0208	0.0287	0.0313	0.0132	0.0259	0.0187	0.0225	0.0161	0.0175	0.0273	0.0194	0.0195	0.0205	0.0265	0.0254	0.0241	0.0394	0.018
cg11740166	0.1044	0.0273	0.033	0.0192	0.0287	0.0249	0.0429	0.0257	0.0355	0.039	0.2007	0.0255	0.0528	0.0282	0.0324	0.0372	0.1613	0.025	0.0282	0.0343	0.0273	0.0409	0.0306	0.0921	0.0511	0.0255	0.039	0.0226	0.0205	0.0294	0.0338	0.0335	0.0361	0.0375	0.0219	0.0271	0.0311	0.0384	0.024	0.0314	0.0375	0.0232	0.0351	0.0237	0.0308	0.0349	0.0367	0.0284	0.0311
cg03854262	0.428	0.062	0.0507	0.0255	0.0375	0.0321	0.0672	0.0708	0.0379	0.0584	0.0989	0.0334	0.046	0.4644	0.0599	0.0447	0.0321	0.0323	0.0359	0.0423	0.039	0.0291	0.0919	0.0389	0.0452	0.0349	0.0529	0.0474	0.0352	0.04	0.0622	0.0859	0.0725	0.0286	0.0688	0.0393	0.0216	0.0252	0.0354	0.0717	0.6797	0.5631	0.0457	0.0374	0.045	0.0529	0.1185	0.1327	0.0405
cg12271419	0.6634	0.7173	0.7024	0.5439	0.3951	0.6418	0.3907	0.428	0.7534	0.7741	0.5251	0.5855	0.4705	0.3065	0.5533	0.4202	0.4739	0.3159	0.7147	0.36	0.8381	0.6429	0.4873	0.8073	0.6971	0.357	0.6148	0.5375	0.7344	0.619	0.815	0.4683	0.703	0.7181	0.7765	0.6898	0.6264	0.8311	0.653	0.5309	0.7054	0.85	0.6932	0.6349	0.5497	0.6682	0.5902	0.6712	0.2603
cg13213923	0.0837	0.0862	0.0322	0.0269	0.0571	0.0319	0.0617	0.0803	0.0278	0.0316	0.0687	0.0483	0.0624	0.9343	0.0561	0.0425	0.1685	0.3325	0.044	0.0513	0.0367	0.0346	0.0579	0.0637	0.0949	0.1701	0.0407	0.0412	0.0438	0.0771	0.0265	0.0506	0.0685	0.1006	0.1662	0.0327	0.0289	0.0525	0.0406	0.0989	0.8063	0.8583	0.0462	0.0285	0.0339	0.0571	0.0652	0.1326	0.2077
cg16261619	0.7572	0.8651	0.7912	0.7405	0.7717	0.7842	0.7865	0.8398	0.8065	0.7808	0.7798	0.8187	0.8342	0.8327	0.8209	0.8091	0.7643	0.809	0.7107	0.8149	0.7999	0.807	0.7932	0.7988	0.7147	0.7997	0.785	0.7718	0.749	0.7805	0.8284	0.7879	0.7953	0.7941	0.7732	0.8067	0.7966	0.8126	0.7267	0.79	0.8666	0.7893	0.7958	0.7747	0.7795	0.8531	0.7903	0.8086	0.8184
cg13468174	0.0172	0.0137	0.0541	0.0142	0.013	0.0115	0.0445	0.0188	0.0104	0.028	0.0126	0.0774	0.013	0.0122	0.0132	0.0142	0.0125	0.0133	0.0251	0.0154	0.0582	0.0108	0.0605	0.0099	0.0131	0.0326	0.0158	0.0108	0.0116	0.0097	0.015	0.0257	0.0319	0.01	0.0101	0.0186	0.0113	0.0102	0.0092	0.0121	0.0335	0.0093	0.0094	0.0148	0.0195	0.0381	0.0173	0.0149	0.013
cg05946623	0.6613	0.7368	0.6203	0.8429	0.5547	0.7028	0.456	0.8795	0.5648	0.6945	0.7287	0.5549	0.6791	0.9421	0.5283	0.6022	0.8835	0.9404	0.2697	0.9036	0.8523	0.8247	0.8935	0.7981	0.1016	0.5734	0.4864	0.6728	0.6069	0.8936	0.5434	0.8656	0.6332	0.8472	0.7582	0.5345	0.3998	0.8533	0.5649	0.8909	0.8981	0.8915	0.8837	0.7604	0.8052	0.5608	0.5668	0.9199	0.6392
cg20014398	0.7787	0.6094	0.1007	0.8015	0.9142	0.6723	0.8734	0.9305	0.9669	0.7555	0.9213	0.7534	0.9125	0.9619	0.871	0.6701	0.9596	0.9762	0.7937	0.958	0.8138	0.8257	0.9295	0.8934	0.9471	0.7821	0.6574	0.7436	0.2622	0.8877	0.9673	0.774	0.6834	0.8006	0.4971	0.6484	0.5751	0.9239	0.4923	0.9487	0.8871	0.9365	0.9132	0.917	0.874	0.8985	0.7929	0.8843	0.9551
cg16783279	0.0689	0.2188	0.4576	0.0996	0.0378	0.45	0.0369	0.4159	0.0587	0.0756	0.0346	0.144	0.1387	0.0208	0.0378	0.0498	0.026	0.1104	0.2634	0.0335	0.0625	0.1222	0.0286	0.0633	0.1019	0.3407	0.062	0.0295	0.0358	0.0273	0.0326	0.0274	0.0285	0.0405	0.0172	0.0527	0.109	0.2473	0.0789	0.0267	0.0372	0.0184	0.0908	0.0285	0.0293	0.0711	0.0243	0.0444	0.0324
cg00978584	0.076	0.036	0.0447	0.052	0.0476	0.0493	0.05	0.0543	0.0556	0.0919	0.2591	0.036	0.0562	0.2538	0.0345	0.0469	0.3878	0.0536	0.0363	0.1786	0.0559	0.0408	0.0878	0.1032	0.0222	0.0413	0.0528	0.1081	0.0608	0.0361	0.0484	0.0589	0.1076	0.0785	0.3421	0.0535	0.0458	0.0435	0.051	0.074	0.7399	0.5727	0.0492	0.0395	0.0612	0.0628	0.0953	0.0629	0.1658
cg12177010	0.8152	0.9253	0.8272	0.8082	0.9102	0.9548	0.8807	0.9133	0.5266	0.9435	0.9393	0.4761	0.9594	0.9569	0.8505	0.543	0.9497	0.9647	0.483	0.9597	0.8664	0.9523	0.8075	0.9434	0.8153	0.9329	0.9051	0.9564	0.9544	0.93	0.9658	0.9344	0.9312	0.8705	0.9666	0.8761	0.9231	0.9317	0.8436	0.9487	0.9503	0.9557	0.8931	0.7887	0.6867	0.9253	0.9025	0.9146	0.9385
cg05016975	0.8232	0.9142	0.9473	0.9292	0.9459	0.9447	0.6721	0.8975	0.9356	0.9621	0.658	0.7721	0.9011	0.8669	0.9347	0.7156	0.9542	0.7395	0.919	0.6863	0.9665	0.8466	0.943	0.9307	0.8896	0.9248	0.9339	0.9322	0.9107	0.9411	0.9332	0.9529	0.9459	0.9066	0.885	0.9531	0.906	0.9361	0.8897	0.9329	0.9495	0.9389	0.9283	0.9196	0.9259	0.9403	0.9505	0.8986	0.5857
cg19992633	0.109	0.3944	0.2021	0.0588	0.1699	0.3537	0.0286	0.5139	0.147	0.2411	0.0389	0.1078	0.2313	0.0179	0.0422	0.047	0.3705	0.6421	0.0365	0.3283	0.061	0.6942	0.0805	0.2479	0.0534	0.0441	0.0347	0.0681	0.333	0.688	0.6728	0.1476	0.2471	0.6141	0.3528	0.2525	0.194	0.0825	0.0293	0.3358	0.5839	0.3003	0.3012	0.7209	0.2188	0.0331	0.1483	0.5618	0.0487
cg07646562	0.5836	0.6496	0.7268	0.4826	0.6516	0.7253	0.5776	0.3968	0.676	0.5991	0.4757	0.6403	0.3971	0.3098	0.5941	0.5471	0.3785	0.4299	0.4572	0.3816	0.769	0.5331	0.6803	0.6556	0.4869	0.5741	0.5722	0.4929	0.673	0.7121	0.761	0.7194	0.7045	0.6423	0.6165	0.6862	0.6317	0.6406	0.5851	0.544	0.581	0.7254	0.5871	0.4002	0.6749	0.6352	0.7218	0.5746	0.3709
cg20052718	0.7298	0.2568	0.3323	0.4952	0.0079	0.4707	0.0101	0.0172	0.0144	0.2616	0.0081	0.2239	0.0078	0.008	0.0169	0.3817	0.0145	0.0083	0.0144	0.0093	0.3771	0.0117	0.4357	0.5611	0.3256	0.0123	0.4075	0.1107	0.012	0.0088	0.404	0.0939	0.0154	0.3153	0.0066	0.1494	0.4747	0.5795	0.313	0.3734	0.0126	0.0081	0.0121	0.0069	0.015	0.3561	0.0175	0.2977	0.4245
cg07081725	0.1539	0.2599	0.1011	0.1546	0.2387	0.1676	0.0925	0.3061	0.2812	0.1098	0.1301	0.0924	0.3109	0.1607	0.2001	0.3959	0.1541	0.1847	0.0709	0.1586	0.0853	0.4185	0.1075	0.3464	0.11309	0.0808	0.0884	0.1913	0.3004	0.1307	0.207	0.1071	0.1737	0.2635	0.3134	0.1078	0.2771	0.2684	0.2366	0.1304	0.5807	0.3788	0.1946	0.1466	0.1128	0.1045	0.1252	0.2954	0.2584
cg06579271	0.0196	0.0371	0.0224	0.0294	0.0233	0.0151	0.0343	0.0216	0.0246	0.0247	0.3832	0.0247	0.0502	0.617	0.0322	0.0181	0.1247	0.0152	0.022	0.0196	0.0224	0.0337	0.0238	0.0756	0.027	0.1932	0.0161	0.0264	0.0192	0.0209	0.0238	0.0224	0.0284	0.0304	0.0183	0.1474	0.023	0.0176	0.0184	0.0216	0.6804	0.1284	0.021	0.0153	0.0262	0.1074	0.0214	0.0241	0.0222
cg26426447	0.0888	0.0462	0.0746	0.0285	0.3994	0.3303	0.4005	0.424	0.023	0.155	0.5624	0.3492	0.0385	0.3539	0.0435	0.0415	0.3997	0.4414	0.0533	0.0939	0.0704	0.0947	0.095	0.4082	0.0509	0.0371	0.0749	0.0496	0.1291	0.0629	0.8075	0.3951	0.294	0.1196	0.0663	0.0424	0.0233	0.2451	0.137	0.5834	0.4533	0.0286	0.0694	0.0414	0.0983	0.0671	0.1376	0.3933	0.1814
cg07555182	0.0293	0.0517	0.0525	0.069	0.0336	0.0297	0.0516	0.0383	0.0454	0.0659	0.0329	0.0882	0.0392	0.0352	0.035	0.0426	0.0309	0.032	0.0464	0.05	0.0764	0.0417	0.0876	0.0377	0.0356	0.0394	0.0633	0.0304	0.0375	0.0447	0.042	0.0638	0.0575	0.0309	0.033	0.0511	0.0325	0.044	0.0324	0.0488	0.0468	0.0327	0.0499	0.0358	0.0471	0.0616	0.0676	0.0327	0.042
cg08799270	0.1185	0.182	0.0861	0.0705	0.0493	0.1256	0.0728	0.2023	0.1351	0.0833	0.1031	0.0671	0.1972	0.1926	0.1231	0.1183	0.0846	0.0698	0.07	0.0858	0.0653	0.0955	0.077	0.1548	0.0799	0.0842	0.082	0.0722	0.0506	0.0802	0.2132	0.0744	0.0829	0.1856	0.0879	0.0839	0.1527	0.1257	0.0844	0.0961	0.0773	0.0742	0.1232	0.0582	0.0657	0.08	0.068	0.2121	0.1071
cg13349425	0.8662	0.8686	0.9065	0.7819	0.5121	0.8683	0.7753	0.3153	0.8771	0.8844	0.4442	0.8428	0.4961	0.2592	0.4314	0.8606	0.9052	0.7525	0.8007	0.4954	0.8786	0.7908	0.5821	0.8254	0.5026	0.7982	0.8485	0.8298	0.9314	0.8929	0.891	0.828	0.7899	0.8857	0.7436	0.8458	0.8925	0.8774	0.6377	0.7457	0.7799	0.7725	0.9276	0.5358	0.5519	0.8721	0.8308	0.6934	0.5732
cg25561792	0.81	0.7914	0.8793	0.6744	0.7833	0.8507	0.6881	0.3273	0.7977	0.6354	0.406	0.8498	0.8218	0.2588	0.8355	0.599	0.6064	0.5314	0.7657	0.6254	0.8891	0.8164	0.721	0.7611	0.8614	0.6785	0.8108	0.7875	0.7419	0.8421	0.8496	0.8111	0.854	0.8598	0.7396	0.8629	0.7773	0.8383	0.6855	0.8329	0.6933	0.7193	0.8153	0.7068	0.8595	0.8662	0.8596	0.7429	0.3534
cg02723291	0.2732	0.6652	0.3845	0.192	0.325	0.2032	0.7	0.1382	0.074	0.3337	0.6955	0.1552	0.1364	0.325	0.5299	0.3443	0.4561	0.0745	0.3077	0.1401	0.2848	0.9497	0.212	0.4326	0.0875	0.3078	0.3464	0.6102	0.5324	0.2306	0.0997	0.3232	0.2996	0.1931	0.462	0.3846	0.4027	0.2436	0.6092	0.495	0.5065	0.3599	0.5354	0.1338	0.2436	0.2938	0.6635	0.2371	0.3249
cg06060853	0.0138	0.017	0.015	0.0125	0.0117	0.0129	0.0162	0.0185	0.0163	0.018	0.0114	0.0172	0.0146	0.0139	0.0163	0.0155	0.0124	0.015	0.013	0.0126	0.0162	0.0125	0.0156	0.0122	0.0118	0.0129	0.0136	0.0118	0.0128	0.0146	0.013	0.0177	0.0166	0.0125	0.0134	0.0171	0.0132	0.0118	0.0133	0.0128	0.0158	0.0144	0.0121	0.0134	0.0166	0.0174	0.0136	0.0161	0.0123
cg20867674	0.8106	0.7345	0.7177	0.5084	0.7578	0.8371	0.7945	0.8722	0.831	0.8393	0.8373	0.7442	0.8496	0.8843	0.817	0.6318	0.8595	0.8212	0.4853	0.9068	0.7186	0.4412	0.7164	0.7965	0.9064	0.782	0.5499	0.7213	0.7304	0.8285	0.855	0.7825	0.7693	0.8629	0.8503	0.6996	0.7443	0.7639	0.4272	0.82	0.8722	0.8326	0.8951	0.7387	0.7802	0.786	0.8332	0.8011	0.848
cg06892726	0.0706	0.062	0.0633	0.047	0.0716	0.0539	0.0708	0.0681	0.1091	0.0653	0.0441	0.0596	0.0979	0.8503	0.0746	0.0759	0.0684	0.0581	0.0562	0.0712	0.0616	0.0821	0.0588	0.0748	0.0434	0.0515	0.062	0.062	0.0533	0.0572	0.0607	0.0525	0.0668	0.0625	0.1024	0.0658	0.0749	0.0632	0.0494	0.0726	0.5421	0.8647	0.0705	0.0467	0.057	0.0595	0.0754	0.096	0.0635
cg00691168	0.0417	0.0505	0.0269	0.0228	0.0273	0.024	0.026	0.049	0.0305	0.0269	0.0236	0.0216	0.0267	0.0316	0.0293	0.0353	0.0241	0.024	0.0229	0.0316	0.0249	0.026	0.0217	0.0334	0.0355	0.0264	0.0275	0.022	0.0338	0.0299	0.0295	0.0286	0.0351	0.0378	0.0189	0.0239	0.0336	0.031	0.0307	0.0278	0.0257	0.0359	0.0289	0.025	0.0256	0.0277	0.0238	0.0459	0.028
cg05925949	0.637	0.5927	0.6815	0.3608	0.6337	0.5584	0.6258	0.5756	0.5526	0.5696	0.7806	0.4408	0.7985	0.7997	0.6392	0.512	0.8305	0.727	0.445	0.5821	0.6156	0.7277	0.7018	0.7546	0.5285	0.5333	0.5702	0.5984	0.4947	0.6011	0.5782	0.5752	0.6088	0.5258	0.7142	0.5679	0.5266	0.5156	0.3876	0.7435	0.823	0.9058	0.7095	0.5797	0.5727	0.7778	0.6507	0.7447	0.7495
cg14088811	0.8716	0.5502	0.747	0.6399	0.8512	0.7758	0.8546	0.7103	0.7899	0.7952	0.7852	0.8485	0.865	0.8436	0.865	0.7094	0.9348	0.9281	0.6209	0.8663	0.7959	0.8031	0.8033	0.8511	0.8734	0.5193	0.6626	0.6969	0.3745	0.7943	0.9066	0.7092	0.7516	0.7924	0.845	0.8003	0.6374	0.8966	0.5923	0.8497	0.8736	0.8208	0.8849	0.6428	0.7788	0.8312	0.6972	0.7694	0.8008
cg15127250	0.7578	0.5887	0.4202	0.1628	0.5049	0.3544	0.7496	0.6365	0.4698	0.37	0.7214	0.7918	0.8584	0.5503	0.5739	0.6415	0.8699	0.3379	0.3779	0.8126	0.3835	0.8079	0.7769	0.6072	0.6219	0.6385	0.5212	0.4144	0.4303	0.7887	0.8912	0.6105	0.7495	0.7547	0.804	0.6229	0.8549	0.8548	0.3623	0.8234	0.7389	0.6829	0.8096	0.3728	0.7039	0.7944	0.5619	0.6786	0.7738
cg08375286	0.5258	0.1013	0.144	0.237	0.3942	0.4555	0.2876	0.1786	0.0508	0.4446	0.6944	0.1068	0.3046	0.5103	0.0788	0.094	0.269	0.308	0.0934	0.0977	0.0882	0.3457	0.3771	0.3536	0.0729	0.166	0.4179	0.1514	0.1396	0.6102	0.0899	0.1549	0.2313	0.0471	0.3749	0.1643	0.0561	0.1568	0.1172	0.2356	0.812	0.808	0.3661	0.0305	0.1817	0.4007	0.4158	0.6251	0.1767
cg05417517	0.3868	0.4767	0.2829	0.7274	0.6682	0.635	0.6688	0.8358	0.4523	0.6149	0.5228	0.3019	0.3508	0.6021	0.4717	0.6497	0.8514	0.1866	0.2457	0.0759	0.1455	0.1497	0.4567	0.7058	0.6002	0.691	0.2345	0.561	0.4185	0.4704	0.588	0.4477	0.3211	0.5917	0.2844	0.3387	0.5019	0.4977	0.536	0.5339	0.8596	0.8339	0.4447	0.1406	0.1626	0.6297	0.6629	0.5869	0.727
cg19526130	0.0904	0.0398	0.0876	0.0517	0.0534	0.0454	0.0553	0.0415	0.0432	0.0403	0.3767	0.0408	0.0715	0.9345	0.052	0.0506	0.1101	0.0385	0.0286	0.047	0.0396	0.0553	0.0525	0.2277	0.0473	0.0331	0.0299	0.046	0.0495	0.054	0.0459	0.054	0.0486	0.0499	0.0521	0.0421	0.0497	0.0562	0.05	0.0508	0.7912	0.8241	0.125	0.0471	0.0516	0.0644	0.1562	0.0926	0.0499
cg00857846	0.0256	0.0376	0.0402	0.0279	0.0308	0.0339	0.0372	0.0383	0.0251	0.0261	0.0292	0.0253	0.031	0.0234	0.0348	0.0286	0.0355	0.0251	0.0229	0.0355	0.0368	0.0268	0.0279	0.0292	0.0197	0.0295	0.0206	0.027	0.0267	0.0317	0.031	0.0408	0.0376	0.0275	0.0349	0.0313	0.0275	0.0288	0.0245	0.028	0.0449	0.0311	0.0291	0.026	0.0324	0.0353	0.0375	0.0488	0.0267
cg21197774	0.0162	0.0176	0.0188	0.0125	0.015	0.0146	0.0164	0.0208	0.0265	0.0169	0.0159	0.018	0.0174	0.0768	0.0182	0.0219	0.0783	0.014	0.017	0.0145	0.0191	0.0189	0.0195	0.0195	0.0109	0.0162	0.0173	0.0153	0.0136	0.0158	0.0166	0.0183	0.015	0.0192	0.0103	0.0163	0.0172	0.017	0.0165	0.0166	0.386	0.0137	0.022	0.0337	0.0174	0.0158	0.0187	0.0217	0.0219
cg07637213	0.4877	0.3693	0.248	0.5317	0.2159	0.192	0.2799	0.5538	0.3366	0.2434	0.5354	0.4054	0.2529	0.3417	0.0856	0.4596	0.4423	0.1207	0.3629	0.6485	0.2808	0.4259	0.271	0.299	0.1773	0.2346	0.2431	0.3899	0.154	0.1202	0.2471	0.5068	0.308	0.5684	0.2312	0.4893	0.4334	0.346	0.2581	0.6833	0.3073	0.457	0.6211	0.1575	0.1732	0.349	0.3001	0.4284	0.5532
cg00714184	0.0112	0.027	0.0261	0.0213	0.0119	0.0148	0.0342	0.0158	0.0117	0.0255	0.0136	0.0169	0.0157	0.7762	0.0144	0.028	0.0748	0.0125	0.0476	0.0125	0.019	0.0196	0.0337	0.0119	0.0225	0.0185	0.0148	0.0193	0.0194	0.0156	0.0273	0.0145	0.023	0.0141	0.0125	0.0289	0.0123	0.1042	0.0217	0.0117	0.0218	0.0239	0.0116	0.0205	0.0146	0.046	0.0178	0.0154	0.0128
cg02930107	0.0437	0.0854	0.0836	0.0273	0.0656	0.0514	0.2824	0.046	0.052	0.136	0.0838	0.0436	0.0517	0.5709	0.0393	0.165	0.0952	0.1623	0.043	0.084	0.0733	0.1071	0.3068	0.0557	0.0253	0.103	0.0447	0.1525	0.0994	0.0742	0.3963	0.0735	0.0971	0.0733	0.1942	0.0801	0.0373	0.0417	0.0385	0.0528	0.6708	0.6565	0.0739	0.0371	0.3492	0.0632	0.0918	0.0876	0.124
cg27367768	0.0414	0.0566	0.027	0.0167	0.0145	0.0159	0.0346	0.0997	0.0245	0.0269	0.0123	0.0286	0.0398	0.0402	0.0331	0.0217	0.0212	0.0206	0.0244	0.0266	0.034	0.0398	0.0372	0.0287	0.0445	0.0289	0.0272	0.0159	0.0205	0.0317	0.0352	0.0268	0.0243	0.0304	0.019	0.026	0.0421	0.0297	0.0181	0.0315	0.0197	0.0178	0.0271	0.0182	0.0368	0.0292	0.0354	0.0881	0.036
cg07991621	0.0802	0.0631	0.1584	0.048	0.0692	0.0968	0.1233	0.0716	0.0595	0.1379	0.0833	0.0576	0.0726	0.5785	0.0621	0.1435	0.0555	0.0536	0.0723	0.0985	0.0819	0.098	0.0745	0.074	0.0389	0.0576	0.1301	0.081	0.1108	0.1365	0.098	0.1053	0.1196	0.1035	0.0652	0.0991	0.0745	0.0601	0.1194	0.096	0.5162	0.3603	0.1368	0.0605	0.0675	0.0855	0.2006	0.0864	0.0733
cg18511007	0.6121	0.0439	0.0855	0.0288	0.0701	0.3877	0.1012	0.0553	0.0774	0.1732	0.0936	0.0854	0.1671	0.4023	0.0374	0.1016	0.1355	0.0703	0.0516	0.3305	0.074	0.0604	0.1063	0.1967	0.0612	0.0664	0.0656	0.0828	0.0659	0.0723	0.1346	0.1081	0.1066	0.0321	0.2336	0.0907	0.0703	0.1078	0.062	0.0404	0.467	0.0978	0.2084	0.0326	0.1081	0.2404	0.3334	0.0987	0.1144
cg11216616	0.0701	0.0535	0.0555	0.0609	0.0472	0.0413	0.0732	0.0545	0.0552	0.0706	0.0876	0.0529	0.0499	0.0696	0.0492	0.0585	0.0579	0.0496	0.051	0.0503	0.0615	0.0781	0.0739	0.074	0.0259	0.0541	0.0649	0.0481	0.05	0.0388	0.0723	0.08	0.0448	0.0793	0.0457	0.0807	0.0435	0.0547	0.0543	0.0586	0.0954	0.0917	0.0395	0.0376	0.05	0.0729	0.0598	0.067	0.0904
cg22589745	0.02	0.0224	0.0389	0.0136	0.0137	0.0109	0.0193	0.0242	0.0148	0.0216	0.0166	0.0172	0.0141	0.0175	0.0197	0.0185	0.0139	0.0145	0.0167	0.014	0.0183	0.0177	0.0192	0.0164	0.0133	0.019	0.0176	0.0147	0.0134	0.0176	0.0176	0.0202	0.0217	0.0206	0.0144	0.0248	0.0149	0.0199	0.016	0.0193	0.0822	0.0145	0.0179	0.0111	0.0236	0.022	0.0218	0.0229	0.0191
cg25651476	0.7407	0.6209	0.6099	0.6919	0.7343	0.4097	0.7505	0.5696	0.7986	0.5193	0.782	0.7242	0.6385	0.2402	0.4765	0.5092	0.7686	0.2397	0.6378	0.4188	0.774	0.6465	0.7104	0.7301	0.7902	0.7563	0.7211	0.5681	0.6759	0.7635	0.7793	0.4058	0.6778	0.7655	0.6411	0.7067	0.5755	0.81	0.4879	0.7513	0.7481	0.3837	0.7646	0.7013	0.4668	0.5933	0.6624	0.3308	0.8069
cg21890551	0.2329	0.0722	0.0702	0.0215	0.141	0.0795	0.356	0.0209	0.0627	0.109	0.359	0.154	0.3542	0.9078	0.3145	0.0342	0.1904	0.8362	0.0382	0.0376	0.0283	0.4197	0.0753	0.3763	0.3242	0.3596	0.0665	0.0611	0.0601	0.0284	0.2559	0.044	0.0828	0.0425	0.2438	0.125	0.0221	0.0897	0.0277	0.2941	0.6101	0.5109	0.6002	0.0197	0.0574	0.2774	0.3277	0.1609	0.5527
cg08152926	0.0269	0.0372	0.0486	0.0208	0.0178	0.0255	0.153	0.0412	0.0295	0.0246	0.0249	0.0233	0.038	0.7202	0.0246	0.029	0.114	0.1493	0.0298	0.0391	0.0218	0.0312	0.0218	0.0305	0.0686	0.0257	0.0329	0.0241	0.0192	0.0256	0.0585	0.0234	0.0327	0.0263	0.0176	0.021	0.031	0.0253	0.0191	0.0297	0.5581	0.1264	0.024	0.0252	0.0198	0.0305	0.0854	0.0615	0.0361
cg21281001	0.0092	0.0122	0.0245	0.0096	0.0101	0.0084	0.012	0.017	0.01	0.0127	0.008	0.0166	0.0099	0.0094	0.011	0.014	0.0104	0.009	0.0117	0.0101	0.0127	0.0094	0.0122	0.0109	0.0099	0.0114	0.0117	0.0125	0.0092	0.0119	0.0104	0.0136	0.0124	0.0109	0.0098	0.0129	0.0104	0.0133	0.0098	0.0136	0.0129	0.0094	0.0108	0.0082	0.0118	0.0122	0.013	0.0121	0.0111
cg01796143	0.0225	0.026	0.0375	0.0264	0.0201	0.0217	0.0293	0.0341	0.0189	0.0234	0.0171	0.0246	0.0209	0.9125	0.0193	0.03	0.1258	0.016	0.0237	0.0252	0.0297	0.0251	0.0312	0.0236	0.0171	0.0186	0.0179	0.0195	0.0215	0.0252	0.0221	0.0305	0.0241	0.0289	0.0221	0.025	0.0272	0.0233	0.0186	0.0267	0.6686	0.4688	0.0262	0.0174	0.0229	0.0239	0.0217	0.0341	0.0247
cg13447539	0.0247	0.0605	0.0755	0.0237	0.0561	0.1016	0.1626	0.2475	0.0938	0.227	0.1839	0.0525	0.0804	0.329	0.0803	0.0469	0.2357	0.0468	0.0618	0.0538	0.1572	0.1146	0.1001	0.2249	0.0309	0.042	0.0667	0.0686	0.0454	0.2947	0.0664	0.0951	0.0628	0.0284	0.0809	0.046	0.039	0.0814	0.0675	0.0836	0.6791	0.3116	0.1265	0.0512	0.0434	0.0964	0.0594	0.2134	0.0878
cg05507819	0.0297	0.0417	0.047	0.0443	0.0376	0.0341	0.042	0.04	0.039	0.0398	0.0361	0.0531	0.0273	0.0439	0.0376	0.041	0.0371	0.0406	0.0344	0.0319	0.0423	0.0535	0.0436	0.0461	0.0238	0.0339	0.0367	0.048	0.0544	0.0475	0.0372	0.0465	0.0531	0.0508	0.0451	0.0552	0.0309	0.0433	0.0448	0.04	0.0478	0.0381	0.053	0.0355	0.0434	0.042	0.0441	0.0481	0.0573
cg08975528	0.9517	0.9692	0.9665	0.953	0.8575	0.987	0.9546	0.907	0.9858	0.976	0.975	0.9742	0.9539	0.9696	0.9774	0.9438	0.9838	0.8475	0.977	0.7848	0.9784	0.8753	0.8813	0.9689	0.979	0.9294	0.9494	0.942	0.9265	0.979	0.9727	0.9597	0.9005	0.3017	0.8569	0.9801	0.9523	0.9827	0.9456	0.9401	0.9664	0.9497	0.9747	0.9206	0.972	0.969	0.9521	0.9546	0.9721
cg12795952	0.0446	0.0227	0.0234	0.0187	0.0199	0.0167	0.0255	0.0241	0.0212	0.028	0.024	0.0216	0.0269	0.0419	0.0215	0.0273	0.0212	0.0247	0.0202	0.0293	0.024	0.0272	0.0251	0.026	0.0213	0.0203	0.0182	0.0199	0.0204	0.0244	0.0229	0.0274	0.0266	0.0317	0.0211	0.025	0.0263	0.028	0.0211	0.0249	0.0242	0.0216	0.0353	0.0168	0.0238	0.025	0.0234	0.0226	0.031
cg20240154	0.4828	0.5413	0.3631	0.5694	0.611	0.8921	0.8069	0.6748	0.4478	0.8001	0.6574	0.4717	0.7984	0.8005	0.8638	0.2817	0.7129	0.8864	0.2188	0.3316	0.6668	0.5734	0.3774	0.8574	0.60944	0.5261	0.5112	0.483	0.4665	0.8732	0.6255	0.657	0.7997	0.8363	0.4109	0.6389	0.7586	0.8338	0.2944	0.8689	0.9067	0.8528	0.8169	0.441	0.4614	0.8245	0.7878	0.7658	0.6926
cg06595693	0.2228	0.3263	0.3878	0.497	0.1414	0.2472	0.3581	0.0974	0.436	0.4808	0.315	0.4402	0.1272	0.0465	0.334	0.1346	0.7025	0.1351	0.1205	0.0876	0.4324	0.4485	0.1949	0.4044	0.3095	0.1372	0.1529	0.1613	0.2329	0.404	0.1274	0.4914	0.155	0.3251	0.0665	0.295	0.1491	0.6343	0.1299	0.2711	0.1508	0.1591	0.2672	0.0648	0.2585	0.3877	0.447	0.1617	0.138
cg19053142	0.7914	0.8317	0.9362	0.8672	0.8649	0.8572	0.9306	0.7924	0.8591	0.9361	0.9165	0.924	0.8468	0.8785	0.8914	0.8866	0.9233	0.8533	0.9306	0.7541	0.9529	0.8537	0.9209	0.8937	0.8212	0.8574	0.9201	0.8602	0.8565	0.9253	0.9111	0.9446	0.9179	0.8817	0.8972	0.8977	0.8787	0.9195	0.8469	0.9138	0.9348	0.8325	0.887	0.8512	0.9294	0.9256	0.9299	0.7573	0.8909
cg25119946	0.3123	0.3521	0.3813	0.2181	0.2341	0.6887	0.2632	0.2052	0.1231	0.559	0.3387	0.2964	0.2566	0.5115	0.1496	0.3234	0.0836	0.3181	0.2485	0.5776	0.3124	0.6601	0.3643	0.517	0.0907	0.3089	0.4221	0.474	0.6367	0.2419	0.1731	0.331	0.665	0.2042	0.4525	0.3874	0.5934	0.1732	0.4731	0.3712	0.9134	0.7823	0.2117	0.379	0.391	0.2221	0.421	0.8239	0.3742
cg27017993	0.8397	0.656	0.8999	0.8041	0.892	0.8505	0.4488	0.7562	0.8199	0.5338	0.5719	0.9197	0.3107	0.4877	0.2346	0.7528	0.6669	0.6379	0.8841	0.2325	0.9231	0.8941	0.8944	0.9088	0.70767	0.6007	0.8226	0.8884	0.862	0.9297	0.93	0.8152	0.7366	0.8685	0.8157	0.899	0.8887	0.9058	0.8806	0.5212	0.8346	0.8419	0.8967	0.7753	0.8927	0.9055	0.706	0.6572	0.7001
cg16977799	0.0616	0.0366	0.0465	0.038	0.044	0.0321	0.0383	0.0306	0.0592	0.0387	0.031	0.0348	0.1614	0.1044	0.0374	0.0523	0.06	0.0417	0.0344	0.0714	0.0458	0.0988	0.044	0.0671	0.0441	0.0392	0.042	0.0376	0.0361	0.0811	0.0689	0.0465	0.0479	0.086	0.0451	0.0475	0.0571	0.0625	0.0414	0.0641	0.0548	0.0862	0.0739	0.0347	0.0399	0.042	0.0458	0.0419	0.0702
cg04387059	0.8727	0.8138	0.8514	0.8934	0.8607	0.8787	0.8939	0.8872	0.9006	0.8834	0.8747	0.8525	0.9234	0.9256	0.8563	0.8775	0.9113	0.8739	0.8707	0.9344	0.8544	0.5678	0.8959	0.885	0.8932	0.8794	0.8045	0.8707	0.8253	0.8776	0.7368	0.8839	0.9051	0.9218	0.8938	0.8646	0.8544	0.9276	0.8153	0.9028	0.8995	0.8879	0.9267	0.85	0.8658	0.8759	0.8822	0.9165	0.942
cg09834162	0.0254	0.0293	0.0252	0.0233	0.0239	0.0184	0.0425	0.0221	0.0355	0.0296	0.021	0.0379	0.0274	0.0319	0.0295	0.0289	0.0222	0.0204	0.0277	0.0295	0.0362	0.0328	0.0606	0.0266	0.0266	0.0361	0.0237	0.0243	0.0346	0.0291	0.0429	0.0257	0.0418	0.0253	0.0241	0.0338	0.024	0.0358	0.0199	0.0244	0.0272	0.0221	0.0252	0.0255	0.0445	0.0392	0.0323	0.0319	0.0378
cg06998137	0.0313	0.023	0.0222	0.0158	0.0163	0.0175	0.022	0.0338	0.0381	0.0249	0.0251	0.0198	0.0365	0.03	0.0225	0.0271	0.0238	0.0153	0.0239	0.0352	0.0238	0.0276	0.0222	0.0273	0.02208	0.0195	0.0228	0.019	0.0191	0.0258	0.0212	0.0221	0.0279	0.0264	0.016	0.0238	0.0284	0.0251	0.0284	0.02	0.0188	0.0219	0.0277	0.0203	0.0222	0.0253	0.0231	0.0271	0.0336
cg26253258	0.024	0.0387	0.0208	0.0341	0.038	0.025	0.0457	0.046	0.0286	0.0359	0.0594	0.023	0.0397	0.0264	0.0481	0.0229	0.0353	0.051	0.0395	0.039	0.0265	0.0515	0.0202	0.032	0.0291	0.0272	0.0429	0.039	0.0245	0.0383	0.0346	0.0311	0.0295	0.0469	0.0306	0.0212	0.0404	0.0319	0.0282	0.0419	0.0366	0.0245	0.0307	0.0291	0.0276	0.0338	0.0217	0.0453	0.0375
cg01822187	0.4867	0.3778	0.4642	0.311	0.2689	0.4114	0.2653	0.3261	0.3274	0.4265	0.2567	0.4394	0.2194	0.2094	0.1913	0.3784	0.3183	0.3165	0.3802	0.1717	0.5529	0.3673	0.3692	0.4351	0.3553	0.3313	0.4169	0.3081	0.4213	0.3362	0.3922	0.4071	0.3722	0.2999	0.3631	0.3877	0.4069	0.4424	0.4189	0.2494	0.3597	0.4281	0.3809	0.2705	0.3547	0.3407	0.3806	0.3455	0.2643
cg08590069	0.7088	0.6449	0.9099	0.6369	0.929	0.9434	0.9242	0.7874	0.5649	0.9347	0.7358	0.6428	0.8045	0.893	0.9299	0.4272	0.9424	0.949	0.4271	0.6145	0.8155	0.7917	0.9389	0.7522	0.7053	0.8601	0.8008	0.868	0.8378	0.6987	0.5482	0.7094	0.7522	0.9098	0.7046	0.6663	0.6855	0.9309	0.8648	0.9432	0.9379	0.9313	0.7313	0.3056	0.8514	0.9108	0.8914	0.8462	0.9227
cg01357334	0.0712	0.0925	0.0807	0.0879	0.0964	0.0786	0.0982	0.1106	0.1445	0.119	0.3945	0.0668	0.0923	0.4262	0.0585	0.1261	0.1512	0.0688	0.095	0.1086	0.0878	0.0859	0.1015	0.1304	0.0633	0.074	0.0731	0.1052	0.1255	0.0796	0.0809	0.088	0.1302	0.0711	0.1047	0.136	0.0813	0.0926	0.1217	0.0851	0.765	0.7827	0.1758	0.1532	0.094	0.1017	0.3284	0.115	0.1091
cg21933175	0.073	0.0665	0.0598	0.0554	0.0534	0.0422	0.0582	0.0954	0.0853	0.0535	0.052	0.039	0.0882	0.0643	0.059	0.0812	0.049	0.0594	0.0358	0.0688	0.054	0.0816	0.0492	0.0771	0.0281	0.0334	0.048	0.0513	0.0947	0.0703	0.0624	0.0571	0.0574	0.088	0.1483	0.0582	0.0679	0.0836	0.0453	0.0644	0.167	0.057	0.1027	0.0591	0.0499	0.0579	0.0526	0.0959	0.0689
cg04620091	0.0101	0.0289	0.0243	0.0112	0.0104	0.0824	0.0224	0.2735	0.0107	0.0251	0.0119	0.016	0.013	0.0213	0.0162	0.014	0.0109	0.0108	0.0125	0.012	0.0253	0.0121	0.0347	0.012	0.0103	0.0114	0.0285	0.0151	0.0069	0.089	0.0299	0.0286	0.0277	0.0118	0.0075	0.1298	0.0122	0.0111	0.01	0.0098	0.0446	0.0119	0.0107	0.009	0.0431	0.0264	0.023	0.0613	0.0106
cg00151919	0.0496	0.0705	0.0461	0.0565	0.059	0.0787	0.0803	0.0607	0.0626	0.0561	0.0517	0.0561	0.0931	0.0872	0.0573	0.0515	0.1215	0.0738	0.0417	0.0642	0.0729	0.1068	0.0498	0.0821	0.1139	0.0441	0.0467	0.0963	0.0599	0.0544	0.2009	0.09	0.0766	0.4348	0.1044	0.1996	0.0627	0.1082	0.0364	0.0662	0.0604	0.4665	0.0835	0.0507	0.0709	0.0859	0.3802	0.074	0.0932
cg09845785	0.0393	0.0849	0.0355	0.0319	0.0332	0.0283	0.0294	0.1139	0.0518	0.0358	0.0239	0.0241	0.038	0.0344	0.0451	0.08	0.0258	0.0311	0.0234	0.0306	0.0267	0.035	0.0289	0.0348	0.0337	0.0224	0.0233	0.0276	0.036	0.0351	0.0331	0.0348	0.042	0.0391	0.0349	0.0503	0.0343	0.0339	0.0268	0.035	0.0304	0.0325	0.0385	0.0222	0.0285	0.0346	0.04	0.0843	0.0298
cg20949700	0.3719	0.8566	0.4216	0.3014	0.8494	0.409	0.7851	0.7216	0.9235	0.4537	0.8526	0.2071	0.7777	0.8702	0.7731	0.6885	0.7509	0.3735	0.6397	0.7527	0.4048	0.5832	0.4812	0.8697	0.0381	0.6075	0.478	0.7393	0.8027	0.7496	0.9041	0.5585	0.8455	0.2167	0.7855	0.8518	0.7678	0.9289	0.8178	0.7968	0.9322	0.8536	0.716	0.782	0.4777	0.4782	0.7111	0.751	0.6521
cg04569055	0.0477	0.0393	0.0427	0.0317	0.0296	0.0382	0.0412	0.0415	0.049	0.0436	0.0639	0.0349	0.0391	0.5465	0.053	0.0423	0.0423	0.031	0.0484	0.0355	0.0425	0.0409	0.0431	0.0396	0.0266	0.0333	0.039	0.0309	0.0417	0.0338	0.0809	0.0626	0.0965	0.0306	0.0483	0.0477	0.0364	0.041	0.0337	0.0262	0.1409	0.3319	0.0405	0.0261	0.054	0.0512	0.0456	0.0764	0.0326
cg26233172	0.1651	0.3168	0.3168	0.2267	0.1608	0.2363	0.1821	0.1251	0.1579	0.2527	0.2627	0.1241	0.0807	0.218	0.061	0.3063	0.0568	0.0758	0.2378	0.1167	0.2281	0.2472	0.1388	0.1943	0.2011	0.2208	0.2857	0.1976	0.4502	0.1449	0.4514	0.3627	0.2724	0.1218	0.1026	0.237	0.1279	0.5682	0.3985	0.1381	0.157	0.0787	0.1093	0.1742	0.1481	0.1568	0.3762	0.133	0.0998
cg21207418	0.8719	0.8674	0.8898	0.8266	0.8831	0.8855	0.8586	0.4966	0.8946	0.842	0.7799	0.834	0.8252	0.1833	0.8522	0.7337	0.7414	0.6809	0.836	0.822	0.8938	0.7088	0.8065	0.8369	0.7121	0.818	0.8316	0.8396	0.8256	0.8892	0.8962	0.8396	0.8732	0.8892	0.862	0.8645	0.8327	0.8953	0.8409	0.8726	0.7558	0.41	0.8959	0.8176	0.77	0.8421	0.9068	0.6927	0.5715
cg02915692	0.7638	0.8785	0.9442	0.8336	0.8519	0.8726	0.4454	0.8284	0.6389	0.9456	0.4437	0.9106	0.3681	0.7603	0.1977	0.5415	0.9118	0.8008	0.9346	0.4305	0.9531	0.8168	0.7694	0.7963	0.746	0.898	0.9094	0.7754	0.8238	0.838	0.8261	0.9478	0.6533	0.671	0.748	0.941	0.7979	0.705	0.7503	0.7853	0.793	0.9143	0.8331	0.2721	0.9156	0.9348	0.9357	0.8583	0.6877
cg24691105	0.0315	0.0157	0.0125	0.0126	0.0114	0.0102	0.0163	0.0189	0.0116	0.015	0.0137	0.0175	0.0129	0.8451	0.0176	0.0149	0.0125	0.0112	0.0158	0.0111	0.0151	0.014	0.0119	0.013	0.0293	0.015	0.0164	0.207	0.0792	0.0147	0.0105	0.0118	0.0134	0.0107	0.0112	0.0148	0.0117	0.0126	0.0137	0.0135	0.5618	0.5136	0.0132	0.0114	0.0103	0.0132	0.0119	0.0242	0.0156
cg20617956	0.0389	0.0522	0.067	0.0387	0.0351	0.0293	0.0655	0.0367	0.0487	0.0638	0.044	0.0549	0.057	0.1204	0.0344	0.0559	0.0315	0.0285	0.0661	0.064	0.0626	0.0362	0.0619	0.0568	0.0369	0.0686	0.075	0.0314	0.0339	0.0529	0.0457	0.062	0.084	0.057	0.0305	0.0661	0.0485	0.0624	0.0305	0.0613	0.069	0.0247	0.0601	0.0269	0.0579	0.0592	0.0844	0.0375	0.0486
cg25792990	0.0677	0.0712	0.0821	0.0728	0.1695	0.4904	0.0844	0.3941	0.1602	0.0965	0.0686	0.0929	0.0989	0.6112	0.0696	0.1428	0.0793	0.4692	0.1062	0.3508	0.0671	0.074	0.0975	0.5043	0.0459	0.0694	0.1002	0.1072	0.0705	0.1121	0.0645	0.0874	0.1144	0.0988	0.2284	0.0754	0.1862	0.1424	0.0846	0.0835	0.8884	0.8658	0.5649	0.0898	0.1172	0.6068	0.0643	0.0758	0.108
cg07837642	0.0394	0.0217	0.0251	0.0161	0.0176	0.0189	0.0175	0.0186	0.0257	0.0186	0.0168	0.0244	0.022	0.0187	0.0164	0.0215	0.016	0.0196	0.0224	0.0209	0.021	0.0316	0.0239	0.0155	0.016	0.0159	0.0217	0.0207	0.0311	0.0257	0.019	0.0264	0.0246	0.0239	0.0168	0.0222	0.0224	0.0273	0.0185	0.0345	0.0222	0.0166	0.021	0.0121	0.0218	0.0216	0.0216	0.0211	0.017
cg00666746	0.9028	0.1721	0.2012	0.1073	0.3384	0.1475	0.1589	0.1645	0.1499	0.2229	0.4745	0.211	0.2363	0.0868	0.1551	0.1713	0.3129	0.222	0.2434	0.1607	0.3084	0.2839	0.2036	0.3179	0.1023	0.1775	0.1752	0.4063	0.1733	0.2209	0.2746	0.2468	0.3313	0.3335	0.3157	0.1831	0.1468	0.3305	0.234	0.2259	0.7494	0.3902	0.4672	0.1623	0.1944	0.2135	0.2153	0.3265	0.4281
cg07311313	0.1187	0.0755	0.0856	0.7322	0.0285	0.2902	0.0294	0.0737	0.0473	0.4142	0.0438	0.8391	0.0449	0.0704	0.0277	0.1244	0.4161	0.0246	0.1435	0.0412	0.402	0.3092	0.3537	0.2303	0.0637	0.129	0.0752	0.1117	0.0553	0.0367	0.1346	0.0208	0.0284	0.1012	0.035	0.1406	0.065	0.2413	0.0631	0.0414	0.061	0.047	0.1176	0.051	0.1553	0.0262	0.0709	0.1346	0.1543
cg24407133	0.9356	0.9235	0.9368	0.9294	0.9482	0.9184	0.9381	0.9312	0.9316	0.9476	0.9228	0.9224	0.9425	0.9496	0.944	0.9207	0.9317	0.9514	0.8745	0.9584	0.9405	0.3069	0.9237	0.9456	0.8469	0.9346	0.8792	0.9312	0.9169	0.9273	0.946	0.9554	0.907	0.9401	0.8618	0.8705	0.9467	0.917	0.9404	0.9285	0.9582	0.9447	0.9484	0.8613	0.927	0.9414	0.9359	0.9464	0.946
cg26286805	0.0134	0.0169	0.0184	0.0107	0.0118	0.0104	0.0147	0.0176	0.0137	0.0168	0.0133	0.0163	0.0128	0.0142	0.0161	0.0165	0.0123	0.0135	0.0134	0.0152	0.0163	0.0142	0.0156	0.0131	0.0111	0.0126	0.014	0.0112	0.0114	0.0126	0.0131	0.0166	0.0161	0.0113	0.012	0.0171	0.0125	0.0116	0.0125	0.0141	0.0246	0.0175	0.0133	0.0114	0.0148	0.0176	0.0164	0.0166	0.0161
cg03413475	0.0658	0.0632	0.0408	0.0486	0.0464	0.0442	0.0469	0.0531	0.0428	0.0484	0.1663	0.0337	0.0797	0.069	0.0314	0.0538	0.1031	0.0525	0.0358	0.0537	0.0408	0.0572	0.0477	0.0715	0.1113	0.0421	0.0583	0.0676	0.0807	0.0429	0.0538	0.0468	0.0396	0.058	0.0761	0.0512	0.0572	0.0612	0.0672	0.0463	0.0571	0.0392	0.0622	0.0506	0.047	0.0527	0.0673	0.0755	0.0622
cg01280609	0.0392	0.0262	0.0302	0.0197	0.0691	0.0733	0.0538	0.037	0.0396	0.0391	0.0733	0.0295	0.046	0.0348	0.0393	0.0344	0.0374	0.0398	0.0222	0.0403	0.0353	0.0673	0.0496	0.1608	0.0353	0.034	0.0279	0.0661	0.0289	0.0379	0.0365	0.0325	0.0374	0.0233	0.0342	0.0347	0.0231	0.0303	0.0345	0.0317	0.3465	0.0201	0.1055	0.0158	0.0336	0.0828	0.0734	0.1102	0.037
cg24664689	0.0436	0.0425	0.0548	0.0345	0.1238	0.0491	0.1218	0.0602	0.0452	0.0885	0.0296	0.055	0.0543	0.0677	0.0861	0.0512	0.0348	0.0717	0.0506	0.057	0.0648	0.0672	0.0746	0.058	0.0551	0.0605	0.058	0.0592	0.2866	0.0574	0.1715	0.0694	0.0829	0.0493	0.0386	0.0684	0.072	0.1413	0.0345	0.0534	0.0622	0.0371	0.0596	0.035	0.0697	0.0854	0.1206	0.072	0.0517
cg27662877	0.0359	0.0295	0.0356	0.0337	0.0278	0.0297	0.0381	0.0322	0.0354	0.0684	0.0363	0.0369	0.0844	0.0599	0.0333	0.0451	0.0477	0.0352	0.0304	0.0462	0.0303	0.0487	0.0419	0.0782	0.0531	0.0432	0.0303	0.0252	0.0378	0.0429	0.057	0.0378	0.0499	0.0487	0.034	0.0388	0.0457	0.0644	0.0325	0.0654	0.053	0.0353	0.0432	0.0302	0.0333	0.0528	0.0551	0.0314	0.0632
cg21804148	0.0434	0.0371	0.0293	0.0185	0.0215	0.0171	0.0189	0.0508	0.0194	0.0234	0.0201	0.0202	0.0297	0.0268	0.0289	0.0186	0.0205	0.0158	0.0195	0.0267	0.0236	0.021	0.0278	0.0289	0.0338	0.0251	0.0176	0.0192	0.0237	0.1302	0.0235	0.0186	0.0266	0.0283	0.0199	0.0286	0.0221	0.0237	0.0236	0.024	0.0317	0.0178	0.0233	0.0229	0.0208	0.0278	0.0236	0.0352	0.023
cg25155149	0.9025	0.8742	0.8976	0.6875	0.8974	0.8755	0.8563	0.8669	0.8833	0.8456	0.8879	0.8751	0.8779	0.7052	0.847	0.8793	0.905	0.8501	0.8325	0.3274	0.8722	0.8714	0.8259	0.8723	0.8716	0.821	0.8105	0.8608	0.8927	0.9186	0.8825	0.8507	0.8347	0.9273	0.8615	0.8524	0.8927	0.9215	0.7307	0.8691	0.8573	0.8822	0.8941	0.7591	0.8503	0.8837	0.8343	0.92	0.804
cg07071609	0.0322	0.0239	0.014	0.0126	0.0128	0.0112	0.0146	0.0158	0.0125	0.0149	0.0108	0.014	0.0158	0.0147	0.0158	0.0153	0.0138	0.0115	0.0141	0.0119	0.0156	0.0141	0.0123	0.0129	0.0517	0.015	0.0166	0.0121	0.0141	0.0113	0.0151	0.0136	0.0161	0.2764	0.0114	0.0166	0.0129	0.0104	0.0158	0.0126	0.2219	0.0625	0.0123	0.0121	0.0111	0.0166	0.0185	0.0179	0.0129
cg01263075	0.0858	0.0448	0.064	0.0528	0.0343	0.0985	0.06	0.4489	0.0389	0.0618	0.0621	0.0449	0.0336	0.0947	0.0458	0.0242	0.2084	0.0432	0.0512	0.0306	0.0611	0.0407	0.0777	0.1482	0.0542	0.0443	0.0413	0.0437	0.0621	0.0315	0.0531	0.0471	0.0938	0.0354	0.0319	0.0555	0.0326	0.0782	0.0276	0.0319	0.1193	0.2638	0.0736	0.0181	0.0553	0.0653	0.0554	0.0546	0.0523
cg16440629	0.0177	0.0325	0.0456	0.0101	0.0113	0.0662	0.0231	0.0301	0.0101	0.0399	0.0535	0.0168	0.0135	0.0241	0.0232	0.0131	0.0529	0.014	0.0161	0.02	0.0329	0.18	0.0253	0.023	0.0167	0.027	0.021	0.0209	0.0141	0.0143	0.0182	0.0224	0.04	0.012	0.0104	0.0246	0.0235	0.0091	0.0105	0.0176	0.1635	0.0588	0.0148	0.0124	0.0274	0.0384	0.027	0.0364	0.0122
cg22636429	0.0307	0.037	0.0388	0.0429	0.0361	0.0352	0.0372	0.0401	0.0424	0.036	0.0369	0.0329	0.0349	0.048	0.0358	0.0602	0.0353	0.0312	0.0366	0.0393	0.0418	0.0389	0.0408	0.0358	0.0219	0.0402	0.0315	0.039	0.0488	0.0384	0.0467	0.0348	0.0416	0.0369	0.0351	0.0394	0.0353	0.041	0.0598	0.0323	0.0467	0.0427	0.0394	0.0382	0.0388	0.0406	0.0355	0.0514	0.0435
cg20611453	0.8488	0.8248	0.9026	0.7176	0.9161	0.9502	0.4949	0.5423	0.7843	0.8976	0.5631	0.8031	0.3639	0.8002	0.692	0.8972	0.8972	0.8843	0.9045	0.8894	0.898	0.8759	0.8373	0.8292	0.9196	0.8506	0.8428	0.9038	0.889	0.8723	0.7449	0.9048	0.8401	0.5264	0.7366	0.8155	0.8725	0.8525	0.82	0.8429	0.7283	0.8216	0.4484	0.838	0.7408	0.8624	0.9043	0.8283	0.877
cg17056132	0.7738	0.8388	0.9288	0.8916	0.9061	0.8558	0.9266	0.8384	0.9331	0.941	0.6778	0.8816	0.8832	0.3025	0.86	0.8677	0.9105	0.9105	0.8323	0.9063	0.9504	0.7466	0.8706	0.8907	0.817	0.8143	0.8422	0.8246	0.875	0.9104	0.8937	0.9255	0.9257	0.808	0.8573	0.9346	0.8667	0.8989	0.8781	0.9185	0.9313	0.7171	0.882	0.8276	0.9206	0.9067	0.9322	0.8628	0.8066
cg11229946	0.0767	0.056	0.1471	0.0836	0.0636	0.0729	0.1171	0.0712	0.0858	0.1624	0.0939	0.0345	0.0976	0.0662	0.049	0.0704	0.2413	0.1275	0.0446	0.0472	0.0711	0.0717	0.1449	0.0662	0.0372	0.035	0.0361	0.0855	0.0532	0.0547	0.0761	0.059	0.0757	0.1552	0.0694	0.1179	0.1374	0.0462	0.0622	0.0424	0.1511	0.1635	0.0576	0.0817	0.0969	0.1269	0.0783	0.0709	0.0548
cg06646285	0.0761	0.0947	0.0772	0.0539	0.0572	0.0517	0.0466	0.087	0.1062	0.0577	0.0486	0.0519	0.1595	0.1111	0.0796	0.1255	0.0472	0.0528	0.0412	0.0786	0.052	0.1005	0.0529	0.0889	0.0581	0.0377	0.0535	0.054	0.1044	0.0529	0.0725	0.0432	0.0586	0.0879	0.0679	0.0551	0.068	0.0808	0.0689	0.065	0.0579	0.0987	0.1015	0.0658	0.0539	0.0551	0.0605	0.1498	0.0764
cg14713933	0.0337	0.0355	0.0313	0.0387	0.0372	0.0273	0.0308	0.0355	0.0749	0.03	0.0311	0.0402	0.0499	0.8377	0.039	0.0937	0.0301	0.0391	0.0344	0.0532	0.0269	0.0632	0.0371	0.0445	0.0375	0.0334	0.0518	0.0435	0.0435	0.0713	0.0881	0.0386	0.0399	0.0561	0.0338	0.0389	0.0554	0.0836	0.0387	0.0633	0.6438	0.276	0.0521	0.0594	0.0326	0.0315	0.028	0.0347	0.0812
cg05995572	0.6321	0.6165	0.7167	0.7235	0.5916	0.8186	0.7919	0.627	0.7777	0.6753	0.6728	0.7006	0.5554	0.486	0.716	0.6799	0.7608	0.5439	0.7081	0.6387	0.7959	0.7161	0.736	0.7209	0.7231	0.6013	0.7549	0.6721	0.8239	0.5527	0.7649	0.66	0.6064	0.7466	0.6407	0.7654	0.7537	0.7823	0.6061	0.6598	0.6708	0.7094	0.7695	0.6356	0.6092	0.7684	0.7027	0.6778	0.5487
cg13518195	0.0715	0.0401	0.0403	0.0217	0.0211	0.0244	0.0632	0.0482	0.0338	0.0347	0.0253	0.0253	0.0352	0.8286	0.0376	0.0397	0.0291	0.5263	0.0408	0.0231	0.0365	0.0218	0.0458	0.1297	0.0376	0.0296	0.0385	0.0217	0.0649	0.0302	0.0185	0.0385	0.0571	0.0255	0.0187	0.0443	0.0195	0.0404	0.0216	0.028	0.714	0.5713	0.0278	0.0188	0.0319	0.0246	0.0381	0.0387	0.0254
cg16463745	0.0424	0.0626	0.0481	0.0391	0.0462	0.0418	0.0499	0.098	0.0484	0.0411	0.0324	0.0384	0.0865	0.0511	0.0538	0.0763	0.0462	0.036	0.0313	0.0552	0.0439	0.1456	0.0476	0.0598	0.0373	0.0385	0.0371	0.043	0.0477	0.0311	0.044	0.0421	0.0548	0.0513	0.0411	0.0476	0.0508	0.0525	0.0388	0.0363	0.0477	0.0484	0.0508	0.0379	0.0431	0.0584	0.0384	0.084	0.0509
cg07330230	0.3275	0.0282	0.032	0.0292	0.0271	0.0216	0.0234	0.0343	0.0248	0.0255	0.0271	0.0248	0.0278	0.0263	0.0248	0.0342	0.0287	0.0236	0.0267	0.026	0.0215	0.0405	0.0276	0.0314	0.0301	0.0249	0.0257	0.0224	0.0363	0.0348	0.0281	0.0248	0.029	0.0366	0.0212	0.037	0.0346	0.0285	0.04	0.034	0.2581	0.026	0.0407	0.0265	0.0207	0.0299	0.0279	0.0393	0.0402
cg15473868	0.11	0.0476	0.0974	0.0516	0.0654	0.1544	0.0826	0.0831	0.0384	0.1524	0.0547	0.0682	0.0643	0.2645	0.0553	0.0769	0.2311	0.1089	0.0596	0.0545	0.0882	0.1409	0.1516	0.1018	0.0546	0.0935	0.0919	0.173	0.0663	0.0494	0.0446	0.1833	0.2271	0.0456	0.1335	0.1107	0.0301	0.0336	0.0993	0.0684	0.6359	0.5549	0.0596	0.0414	0.1722	0.0954	0.1932	0.1687	0.0827
cg02855207	0.7557	0.7195	0.628	0.4738	0.8227	0.6408	0.7888	0.6756	0.8167	0.6528	0.8325	0.555	0.8492	0.7463	0.8439	0.62	0.9119	0.8687	0.3128	0.6925	0.6114	0.6908	0.7421	0.8057	0.6532	0.6487	0.6714	0.7132	0.653	0.7955	0.8664	0.7079	0.6821	0.7751	0.4546	0.6603	0.6611	0.8617	0.6847	0.8448	0.8826	0.8653	0.8078	0.7174	0.5644	0.7755	0.7101	0.7491	0.7672
cg15662822	0.0467	0.0447	0.0449	0.0424	0.0411	0.0319	0.0429	0.0375	0.0644	0.0511	0.0565	0.0305	0.0607	0.0514	0.0379	0.0533	0.0535	0.0384	0.0347	0.0493	0.0544	0.058	0.0504	0.0542	0.0428	0.0339	0.0331	0.037	0.038	0.038	0.054	0.0401	0.0409	0.061	0.0341	0.0505	0.0439	0.0549	0.0474	0.0446	0.0451	0.032	0.0583	0.0389	0.0533	0.0512	0.0427	0.0466	0.0478
cg19435033	0.0305	0.0248	0.0239	0.0192	0.0288	0.0339	0.0436	0.0193	0.0262	0.0251	0.0553	0.026	0.0269	0.888	0.0266	0.025	0.0283	0.02	0.0288	0.0238	0.0283	0.0218	0.0216	0.091	0.0323	0.0195	0.0228	0.0227	0.0197	0.0231	0.0213	0.0275	0.023	0.0258	0.0239	0.0236	0.0213	0.0212	0.0197	0.0282	0.6999	0.4129	0.3216	0.024	0.0308	0.1014	0.249	0.0241	0.0279
cg02642123	0.5201	0.3147	0.087	0.0518	0.4121	0.1266	0.3608	0.0871	0.137	0.2357	0.7382	0.0709	0.7679	0.9294	0.3449	0.1886	0.6415	0.8899	0.6292	0.8375	0.051	0.05	0.5164	0.2624	0.2021	0.6692	0.1163	0.5707	0.0706	0.3285	0.0514	0.3591	0.6522	0.2816	0.4914	0.083	0.3946	0.6942	0.3061	0.8524	0.8163	0.8044	0.412	0.287	0.3209	0.553	0.4203	0.3679	0.5938
cg19630440	0.0154	0.0155	0.0178	0.0142	0.0123	0.012	0.0178	0.0157	0.0146	0.0211	0.0119	0.0145	0.015	0.0161	0.0167	0.0173	0.0163	0.0146	0.0118	0.018	0.0182	0.0152	0.0182	0.0176	0.013	0.0144	0.0124	0.0137	0.0125	0.0164	0.0166	0.018	0.0215	0.0174	0.0142	0.0168	0.0167	0.0144	0.0144	0.0184	0.279	0.0223	0.0173	0.0149	0.0185	0.0191	0.0113	0.0156	0.0165
cg09214254	0.0943	0.0808	0.1195	0.0454	0.0909	0.4871	0.5428	0.0952	0.1278	0.1162	0.2368	0.099	0.0596	0.5455	0.0962	0.155	0.2374	0.059	0.0943	0.1395	0.1115	0.1328	0.1865	0.2746	0.0642	0.1025	0.1207	0.1564	0.1014	0.4889	0.2039	0.1114	0.1518	0.3494	0.0888	0.2238	0.0561	0.3281	0.2798	0.0976	0.4168	0.1683	0.2027	0.138	0.0979	0.115	0.1525	0.3796	0.057
cg09831553	0.0329	0.0898	0.0927	0.0341	0.062	0.0312	0.0751	0.042	0.0486	0.1256	0.0785	0.0436	0.047	0.0371	0.0446	0.0542	0.0287	0.0267	0.0491	0.0359	0.0472	0.0411	0.0558	0.0423	0.0433	0.0793	0.0436	0.0283	0.0917	0.0389	0.0454	0.0648	0.1167	0.068	0.0914	0.1081	0.0255	0.0479	0.0277	0.0455	0.0916	0.0264	0.0788	0.0333	0.1051	0.084	0.0926	0.0774	0.0342
cg00674304	0.1121	0.0586	0.0399	0.0212	0.0282	0.1874	0.041	0.1135	0.0239	0.0498	0.3785	0.0267	0.0277	0.8694	0.03	0.0186	0.0554	0.0638	0.0378	0.0218	0.0441	0.0295	0.033	0.0821	0.3422	0.0307	0.0412	0.0343	0.0633	0.0299	0.0246	0.0421	0.1503	0.0263	0.0495	0.1309	0.0405	0.1156	0.0338	0.0264	0.748	0.5376	0.5261	0.0168	0.0609	0.0926	0.087	0.0379	0.0229
cg22336806	0.8648	0.5155	0.5124	0.6005	0.7568	0.6662	0.8623	0.6955	0.4849	0.6507	0.7866	0.8916	0.8967	0.8898	0.7673	0.8559	0.8262	0.9334	0.6197	0.8819	0.11	0.3949	0.8721	0.5735	0.4243	0.5775	0.3218	0.6356	0.3087	0.6738	0.9135	0.6615	0.5124	0.7033	0.6163	0.7042	0.6383	0.817	0.5747	0.8677	0.9173	0.8565	0.816	0.8559	0.6282	0.7727	0.6062	0.6489	0.871
cg07315745	0.3582	0.1953	0.5656	0.6074	0.1892	0.3203	0.0826	0.5425	0.029	0.2695	0.5025	0.5157	0.0215	0.0276	0.097	0.2592	0.145	0.0189	0.5237	0.0717	0.3864	0.0326	0.5208	0.5027	0.5275	0.2624	0.375	0.4481	0.043	0.0339	0.7201	0.0506	0.0599	0.1382	0.0298	0.4781	0.3213	0.1258	0.0654	0.1247	0.0674	0.0327	0.0506	0.1588	0.473	0.4283	0.0691	0.4025	0.2549
cg10248302	0.0411	0.0401	0.0462	0.0402	0.03	0.0294	0.0529	0.0424	0.0363	0.034	0.0326	0.0484	0.0344	0.0362	0.036	0.038	0.0364	0.0499	0.0608	0.0313	0.0553	0.039	0.0543	0.035	0.0447	0.0301	0.0263	0.0373	0.0366	0.0315	0.0321	0.0462	0.0435	0.0398	0.0289	0.0482	0.0235	0.0317	0.0309	0.0334	0.0374	0.0283	0.0315	0.0418	0.0485	0.0597	0.0461	0.0442	0.0301
cg05209770	0.052	0.0213	0.0211	0.0151	0.0157	0.0155	0.0262	0.0196	0.0282	0.0177	0.0172	0.0241	0.0195	0.0201	0.0169	0.0209	0.0166	0.0155	0.0223	0.0182	0.0198	0.0239	0.0235	0.0204	0.0629	0.0206	0.0229	0.0148	0.0267	0.0214	0.0188	0.0159	0.0191	0.0201	0.0163	0.0214	0.0199	0.0241	0.0171	0.0216	0.0154	0.0207	0.0264	0.0188	0.0164	0.0199	0.0191	0.0215	0.0275
cg06980169	0.0457	0.0565	0.0559	0.0325	0.0516	0.0422	0.0564	0.0453	0.0553	0.0571	0.0931	0.0438	0.0539	0.9218	0.0538	0.0699	0.0767	0.0795	0.0456	0.049	0.0585	0.063	0.0518	0.0789	0.0454	0.0488	0.0447	0.0516	0.0685	0.0628	0.0591	0.0709	0.0745	0.0618	0.0584	0.0528	0.052	0.0648	0.0441	0.0477	0.4346	0.7052	0.0552	0.034	0.0543	0.0598	0.0576	0.0449	0.0951
cg09018483	0.7853	0.6061	0.5021	0.3045	0.3602	0.4142	0.2926	0.2917	0.539	0.416	0.3929	0.2597	0.2777	0.1122	0.3094	0.3967	0.2281	0.2348	0.5169	0.2213	0.5983	0.7335	0.3218	0.4337	0.5382	0.3719	0.5761	0.4015	0.5418	0.4029	0.1962	0.4871	0.42	0.2574	0.3985	0.4847	0.5124	0.3476	0.481	0.2405	0.3361	0.5231	0.4797	0.2389	0.2907	0.3398	0.3987	0.4554	0.2961
cg06999381	0.0177	0.0273	0.0192	0.0158	0.0184	0.0173	0.0175	0.0395	0.0215	0.0235	0.0135	0.02	0.0199	0.018	0.0209	0.0261	0.0154	0.0152	0.0198	0.018	0.0155	0.0205	0.0179	0.0192	0.013	0.0176	0.0171	0.0146	0.0311	0.0169	0.0185	0.0221	0.0213	0.4714	0.0339	0.0176	0.0185	0.0185	0.0175	0.0157	0.0167	0.0281	0.0173	0.018	0.0174	0.0173	0.021	0.0254	0.4787
cg03446876	0.4301	0.9284	0.9414	0.2816	0.4892	0.358	0.7041	0.2224	0.9538	0.459	0.3839	0.2939	0.3015	0.1304	0.6262	0.4618	0.1854	0.4202	0.873	0.235	0.9665	0.8331	0.3346	0.6738	0.1751	0.4749	0.6919	0.4596	0.8715	0.3404	0.7898	0.5848	0.434	0.7911	0.7584	0.9279	0.6157	0.8299	0.6666	0.2554	0.3316	0.1577	0.8584	0.1586	0.4405	0.5219	0.6011	0.3239	0.278
cg03228353	0.7871	0.8143	0.8074	0.7237	0.6444	0.7858	0.7406	0.6156	0.8378	0.7609	0.3901	0.8242	0.8329	0.313	0.4304	0.7483	0.5916	0.7082	0.7802	0.6102	0.8188	0.7888	0.6131	0.7876	0.8031	0.6074	0.7776	0.745	0.8005	0.7699	0.7027	0.7833	0.7669	0.6337	0.7868	0.7984	0.7916	0.7372	0.5903	0.588	0.7104	0.6428	0.8022	0.6399	0.7392	0.8297	0.7336	0.7048	0.5251
cg08184640	0.0364	0.0313	0.0347	0.0344	0.0443	0.0237	0.0411	0.0359	0.0407	0.038	0.0801	0.0334	0.0457	0.0498	0.03	0.0431	0.0481	0.0263	0.0355	0.0438	0.0488	0.0397	0.0381	0.0321	0.0255	0.0294	0.0584	0.0287	0.0474	0.0306	0.0291	0.0329	0.0353	0.0366	0.0251	0.0418	0.0281	0.0378	0.0203	0.028	0.0446	0.027	0.0371	0.0334	0.0397	0.0348	0.0552	0.0299	0.0489
cg08430409	0.0696	0.0613	0.0458	0.0324	0.0357	0.0478	0.0548	0.0639	0.0376	0.0561	0.0382	0.0443	0.0438	0.0585	0.049	0.0328	0.0366	0.0306	0.0421	0.0583	0.0555	0.0367	0.0533	0.0505	0.0313	0.051	0.0366	0.0336	0.0166	0.0718	0.038	0.0417	0.0716	0.0564	0.0527	0.0372	0.0363	0.0286	0.0325	0.0616	0.0775	0.0451	0.0464	0.0356	0.051	0.0427	0.0363	0.0545	0.039
cg01377916	0.4303	0.0402	0.0383	0.03	0.0268	0.0435	0.042	0.0473	0.0446	0.0688	0.0327	0.0375	0.0655	0.0394	0.0435	0.045	0.0355	0.0359	0.041	0.0321	0.0403	0.0692	0.0486	0.0434	0.0489	0.0512	0.0482	0.0376	0.0292	0.0447	0.0418	0.0451	0.0622	0.037	0.0487	0.0337	0.0535	0.065	0.0424	0.0402	0.0487	0.0383	0.0497	0.0302	0.041	0.0434	0.0408	0.0499	0.0397
cg09767598	0.0531	0.047	0.028	0.0229	0.0246	0.0199	0.0242	0.0347	0.0244	0.0345	0.0182	0.0217	0.0269	0.0917	0.0325	0.0301	0.0249	0.0223	0.0313	0.0272	0.0269	0.0332	0.025	0.0339	0.0552	0.0242	0.0265	0.023	0.0414	0.027	0.0289	0.0227	0.0351	0.0286	0.0205	0.0298	0.0336	0.0346	0.0202	0.031	0.021	0.0225	0.0272	0.0223	0.0364	0.039	0.0259	0.0375	0.0319
cg21807240	0.0376	0.0348	0.0372	0.0342	0.0323	0.0466	0.0533	0.0539	0.0606	0.0385	0.0525	0.0342	0.0876	0.0507	0.0293	0.0567	0.0647	0.043	0.0305	0.0786	0.0319	0.0491	0.0408	0.0565	0.0521	0.0321	0.0332	0.0474	0.0418	0.0579	0.0358	0.0379	0.0982	0.0557	0.0481	0.0429	0.0459	0.0433	0.0344	0.1349	0.0476	0.046	0.0377	0.0402	0.035	0.0575	0.0527	0.0556	0.0673
cg16595261	0.0519	0.04	0.022	0.0196	0.0209	0.022	0.0214	0.0256	0.0376	0.0214	0.0202	0.0194	0.0382	0.9739	0.0205	0.0263	0.0485	0.6035	0.021	0.0264	0.0191	0.0312	0.018	0.0597	0.0545	0.0207	0.0209	0.018	0.0384	0.0336	0.0575	0.0238	0.0222	0.0568	0.0205	0.0194	0.0323	0.0304	0.0181	0.0367	0.696	0.698	0.0312	0.0173	0.0197	0.0216	0.0209	0.0408	0.0265
cg18050543	0.016	0.0166	0.0131	0.0115	0.0106	0.0099	0.0122	0.0161	0.0111	0.0133	0.0109	0.0137	0.0126	0.0133	0.0171	0.0141	0.0106	0.0119	0.0135	0.0116	0.0122	0.0115	0.0124	0.0127	0.01297	0.0145	0.0141	0.0142	0.0094	0.0138	0.0124	0.0112	0.0147	0.0107	0.0102	0.0139	0.012	0.0111	0.0128	0.0129	0.0119	0.0142	0.0097	0.0104	0.0126	0.0145	0.0133	0.0165	0.0118
cg10844118	0.1177	0.0772	0.0387	0.0447	0.0452	0.0434	0.0432	0.0684	0.1323	0.0356	0.0745	0.0347	0.0832	0.0697	0.0589	0.1031	0.0643	0.0428	0.0549	0.0986	0.032	0.0789	0.0383	0.066	0.1458	0.0365	0.0382	0.0525	0.0865	0.0578	0.0549	0.0324	0.0288	0.0645	0.0455	0.0437	0.0691	0.0536	0.0566	0.0555	0.0272	0.0557	0.0643	0.074	0.0453	0.0365	0.0401	0.089	0.1019
cg16655375	0.0586	0.0364	0.0351	0.0346	0.0445	0.0296	0.0413	0.0317	0.0435	0.0426	0.0271	0.0322	0.0583	0.1183	0.0394	0.055	0.0303	0.0327	0.0319	0.0374	0.0453	0.0643	0.0511	0.0513	0.0223	0.0316	0.0295	0.0324	0.0278	0.0498	0.0604	0.0453	0.0433	0.0614	0.0264	0.0446	0.0487	0.0508	0.0281	0.0416	0.0406	0.0348	0.0543	0.0294	0.0295	0.0414	0.0337	0.0399	0.0557
cg04256466	0.296	0.2422	0.169	0.113	0.3109	0.173	0.3373	0.2038	0.1421	0.2504	0.2486	0.1142	0.4002	0.1938	0.1418	0.159	0.8195	0.4224	0.2418	0.0976	0.1021	0.3362	0.3086	0.2898	0.2651	0.2528	0.1024	0.2964	0.2429	0.1097	0.1336	0.1608	0.2721	0.1453	0.486	0.176	0.0808	0.2044	0.2032	0.1492	0.6534	0.4097	0.3498	0.1691	0.1325	0.1961	0.2755	0.2316	0.3319
cg13267177	0.0239	0.0179	0.0159	0.0145	0.0119	0.0128	0.0143	0.0177	0.0141	0.015	0.0147	0.0133	0.0145	0.0125	0.0172	0.0173	0.0125	0.0133	0.0177	0.0126	0.015	0.0127	0.015	0.0139	0.0429	0.0161	0.0149	0.0123	0.015	0.0152	0.0135	0.0157	0.0122	0.0151	0.0131	0.0139	0.014	0.0166	0.0134	0.0139	0.0132	0.0182	0.0133	0.0148	0.0123	0.0141	0.0153	0.0167	0.0141
cg00512280	0.1001	0.0481	0.0586	0.0514	0.039	0.0551	0.0671	0.0653	0.0492	0.0857	0.1132	0.0757	0.0708	0.2422	0.0701	0.0604	0.1018	0.0668	0.0618	0.0589	0.0743	0.0484	0.1133	0.0628	0.031	0.0713	0.068	0.0939	0.0406	0.0458	0.0438	0.1109	0.127	0.0519	0.1647	0.0648	0.0365	0.0657	0.0841	0.0614	0.6672	0.456	0.0662	0.0537	0.0763	0.0663	0.0872	0.0901	0.0713
cg22721827	0.5081	0.5349	0.4175	0.1849	0.258	0.3985	0.4327	0.1908	0.3559	0.4315	0.2448	0.3751	0.1946	0.0804	0.174	0.2624	0.3286	0.134	0.3351	0.1428	0.5907	0.3052	0.334	0.4238	0.4259	0.2736	0.5383	0.3796	0.6057	0.3671	0.1934	0.3683	0.4287	0.2667	0.5129	0.3852	0.4097	0.4418	0.2907	0.2245	0.5252	0.223	0.4754	0.267	0.2665	0.4082	0.4741	0.3089	0.1217
cg08728865	0.9426	0.9458	0.9433	0.9375	0.9035	0.9213	0.8036	0.5146	0.9404	0.8678	0.8357	0.8758	0.5214	0.8335	0.4608	0.9286	0.7509	0.62	0.8424	0.4272	0.9357	0.8489	0.8936	0.9045	0.5521	0.8406	0.8984	0.9022	0.9554	0.8934	0.9445	0.8232	0.7592	0.8817	0.822	0.9053	0.9482	0.9168	0.8152	0.5248	0.4152	0.8796	0.9333	0.9126	0.8148	0.9191	0.8995	0.6631	0.8217
cg05240570	0.0635	0.118	0.2704	0.0457	0.057	0.0611	0.0463	0.1412	0.0965	0.13	0.0821	0.0777	0.069	0.7126	0.0859	0.0767	0.335	0.1796	0.0524	0.0774	0.3429	0.0391	0.0808	0.09	0.1343	0.0496	0.0737	0.0569	0.0231	0.0522	0.3622	0.1199	0.1316	0.0566	0.0691	0.1031	0.1138	0.0873	0.16	0.0642	0.7848	0.3651	0.1054	0.0453	0.0902	0.4262	0.2145	0.2205	0.0494
cg14914822	0.0292	0.0305	0.0286	0.0152	0.0158	0.0298	0.0326	0.027	0.0165	0.0246	0.0254	0.0165	0.015	0.0166	0.0183	0.0145	0.0323	0.6636	0.0188	0.0196	0.0237	0.0959	0.0265	0.078	0.0595	0.0242	0.0244	0.0661	0.0234	0.0177	0.0269	0.0361	0.0697	0.0175	0.1392	0.0377	0.0178	0.016	0.0209	0.0218	0.5929	0.449	0.0214	0.0189	0.0474	0.0204	0.2285	0.0377	0.0218
cg05610740	0.0311	0.109	0.0389	0.0326	0.0411	0.0216	0.082	0.1531	0.0454	0.0499	0.019	0.0514	0.0705	0.0863	0.0627	0.0299	0.0207	0.0218	0.0781	0.0718	0.0472	0.0428	0.0443	0.0728	0.0599	0.0443	0.0661	0.0203	0.0224	0.0757	0.1029	0.0453	0.0557	0.0762	0.0206	0.0431	0.063	0.0343	0.0205	0.047	0.0615	0.024	0.0327	0.0272	0.0447	0.0588	0.0528	0.1366	0.0693
cg04198210	0.8099	0.736	0.9158	0.8451	0.8451	0.8566	0.8514	0.4707	0.7818	0.8941	0.7629	0.7846	0.8495	0.1755	0.8228	0.6996	0.8849	0.4525	0.7967	0.8357	0.8764	0.7991	0.8626	0.8409	0.7545	0.7464	0.7497	0.7646	0.8152	0.8476	0.8704	0.8763	0.8559	0.8417	0.9265	0.8601	0.8116	0.8873	0.747	0.8604	0.7222	0.8703	0.8757	0.7534	0.849	0.8707	0.8443	0.7545	0.6968
cg13416310	0.0465	0.0664	0.0391	0.0301	0.0356	0.0393	0.035	0.0748	0.0387	0.0375	0.0308	0.0399	0.0419	0.0451	0.0505	0.0643	0.0618	0.0379	0.0361	0.037	0.0321	0.0382	0.0385	0.0495	0.079	0.0492	0.0437	0.0259	0.0448	0.0393	0.0416	0.0474	0.035	0.044	0.0409	0.0312	0.0448	0.0481	0.036	0.0476	0.2439	0.0554	0.044	0.0504	0.0297	0.0407	0.0326	0.0753	0.031
cg27415006	0.0256	0.0378	0.0312	0.0253	0.0249	0.0207	0.0306	0.0444	0.0263	0.0272	0.0336	0.0273	0.0289	0.024	0.0375	0.0312	0.0321	0.0227	0.0318	0.0314	0.0264	0.0271	0.0422	0.0323	0.0214	0.0277	0.0316	0.0259	0.029	0.0349	0.0339	0.0346	0.0426	0.0322	0.0293	0.03	0.029	0.0383	0.0235	0.0299	0.0291	0.0342	0.0316	0.033	0.0333	0.0373	0.0389	0.0436	0.0343
cg07207099	0.0382	0.0247	0.0604	0.0196	0.015	0.0264	0.0567	0.0859	0.0217	0.0577	0.0507	0.0225	0.3057	0.9004	0.0264	0.0426	0.1376	0.0137	0.0302	0.0241	0.031	0.0256	0.0522	0.0414	0.0754	0.0378	0.0453	0.0934	0.026	0.0154	0.0275	0.0339	0.0813	0.0187	0.017	0.0346	0.0204	0.0149	0.0215	0.0128	0.7843	0.5633	0.0185	0.0167	0.0388	0.0367	0.1381	0.1123	0.0411
cg06218066	0.0113	0.0147	0.0138	0.011	0.0129	0.0111	0.0132	0.2748	0.009	0.0146	0.0124	0.0162	0.0116	0.0138	0.0114	0.0159	0.0131	0.0148	0.0147	0.0146	0.0137	0.0132	0.0131	0.0116	0.0125	0.013	0.0136	0.0118	0.0122	0.0107	0.0146	0.0143	0.0148	0.0122	0.0125	0.0142	0.0114	0.0105	0.0116	0.0134	0.0169	0.0116	0.0118	0.0104	0.0139	0.0182	0.0155	0.0177	0.0122
cg19851715	0.0506	0.0389	0.0482	0.0499	0.0408	0.0368	0.053	0.0356	0.0743	0.0359	0.044	0.0342	0.0885	0.4198	0.0366	0.0452	0.0812	0.0469	0.0439	0.0333	0.05	0.0453	0.0472	0.0392	0.0389	0.0351	0.0391	0.0437	0.0616	0.0294	0.0345	0.0481	0.0491	0.0409	0.0458	0.051	0.0434	0.0307	0.0412	0.0307	0.0517	0.0725	0.0318	0.0399	0.047	0.0395	0.0572	0.0484	0.0374
cg18086416	0.0896	0.3131	0.3769	0.3818	0.0718	0.4153	0.1815	0.0827	0.1242	0.2551	0.1069	0.4083	0.1295	0.0656	0.0604	0.1296	0.134	0.1212	0.0983	0.1155	0.4322	0.2988	0.3162	0.3002	0.2598	0.199	0.2827	0.3196	0.1507	0.1539	0.2561	0.2534	0.1425	0.0968	0.0716	0.2416	0.1571	0.3003	0.0817	0.3611	0.1226	0.1324	0.2029	0.0385	0.1184	0.444	0.1736	0.3305	0.0747
cg08481119	0.1286	0.0972	0.0669	0.1249	0.1176	0.0942	0.0574	0.2079	0.1648	0.0537	0.1099	0.0559	0.1025	0.1261	0.0983	0.088	0.0995	0.0899	0.0707	0.089	0.0619	0.1037	0.0733	0.1251	0.0984	0.0649	0.0676	0.0842	0.1547	0.0988	0.0901	0.0734	0.0565	0.1505	0.09	0.0581	0.1252	0.0929	0.1253	0.0954	0.05	0.103	0.115	0.1371	0.0799	0.0667	0.0772	0.1548	0.0899
cg05765482	0.0207	0.0221	0.0219	0.0188	0.0187	0.0193	0.026	0.0201	0.0154	0.0249	0.0151	0.0227	0.0203	0.6738	0.0191	0.0203	0.0182	0.0183	0.0192	0.0175	0.0239	0.0176	0.0212	0.0169	0.021	0.0183	0.0212	0.0195	0.0165	0.0184	0.0179	0.0235	0.0225	0.0216	0.0179	0.0228	0.0205	0.0183	0.0186	0.0188	0.4255	0.1979	0.0204	0.0153	0.0219	0.0236	0.0221	0.0258	0.0178
cg25693289	0.0136	0.0255	0.0208	0.0149	0.0207	0.0143	0.0206	0.0236	0.0205	0.0245	0.0151	0.0204	0.0159	0.9236	0.0206	0.0405	0.0144	0.0166	0.023	0.0184	0.0197	0.0215	0.0226	0.0176	0.0108	0.0203	0.0223	0.017	0.0159	0.022	0.0258	0.0294	0.0397	0.0203	0.0182	0.026	0.0145	0.0206	0.0188	0.0185	0.7358	0.4393	0.0196	0.0207	0.0238	0.0238	0.0203	0.0266	0.0256
cg09686610	0.0763	0.0575	0.0435	0.0411	0.053	0.0431	0.0466	0.0611	0.0734	0.0398	0.0444	0.0511	0.0769	0.0858	0.0598	0.0839	0.0794	0.0483	0.0369	0.0505	0.0475	0.0617	0.0335	0.0786	0.0325	0.0546	0.0433	0.0528	0.0491	0.0752	0.06	0.0449	0.0412	0.0989	0.0455	0.0482	0.0641	0.0599	0.0494	0.0583	0.0482	0.0545	0.063	0.0415	0.0442	0.0513	0.044	0.061	0.0731
cg03694713	0.7399	0.0803	0.6021	0.7213	0.2452	0.5216	0.2025	0.4294	0.2884	0.2522	0.1603	0.5152	0.048	0.111	0.0431	0.1822	0.5969	0.0421	0.0678	0.0479	0.488	0.4748	0.2037	0.5422	0.5466	0.1643	0.4872	0.1658	0.0888	0.0556	0.8626	0.1727	0.0573	0.1957	0.0425	0.2123	0.2696	0.4083	0.1351	0.2048	0.0662	0.0724	0.7769	0.58	0.1574	0.4471	0.4203	0.3136	0.5828
cg04818943	0.7594	0.2138	0.14	0.0458	0.3871	0.1258	0.0543	0.6361	0.0788	0.0364	0.1987	0.5327	0.0499	0.0621	0.517	0.0494	0.3309	0.0395	0.087	0.0676	0.2346	0.0692	0.1324	0.1527	0.1968	0.1289	0.0438	0.0619	0.0421	0.2936	0.1402	0.0593	0.0968	0.0729	0.0362	0.1663	0.0596	0.1581	0.1027	0.3368	0.0444	0.0383	0.0698	0.2939	0.0637	0.1897	0.0415	0.1234	0.0919
cg05525106	0.0313	0.0421	0.403	0.0282	0.5103	0.3743	0.2862	0.3758	0.069	0.3491	0.1331	0.0829	0.3756	0.8345	0.43	0.0375	0.0742	0.1111	0.0283	0.5111	0.0296	0.1061	0.6971	0.5071	0.3899	0.5065	0.0299	0.246	0.1902	0.6606	0.1933	0.4002	0.3961	0.3166	0.2746	0.2383	0.2635	0.0835	0.2063	0.0692	0.4249	0.6582	0.0576	0.0215	0.064	0.6095	0.4635	0.3037	0.1047
cg05037270	0.8597	0.8832	0.9016	0.8652	0.9247	0.828	0.8946	0.9125	0.894	0.9229	0.8997	0.8771	0.9432	0.9211	0.8767	0.8957	0.8992	0.8835	0.88	0.9114	0.9121	0.9369	0.9164	0.9264	0.3728	0.8649	0.8167	0.8955	0.9102	0.9242	0.9032	0.9245	0.9148	0.9189	0.8868	0.9229	0.9209	0.9304	0.9327	0.9158	0.9388	0.8808	0.9179	0.9047	0.9011	0.9057	0.9188	0.9174	0.9225
cg16587838	0.4203	0.4652	0.432	0.3773	0.5426	0.2471	0.479	0.5841	0.2717	0.5761	0.579	0.4817	0.7026	0.7821	0.5669	0.271	0.611	0.8284	0.2675	0.6671	0.5766	0.2531	0.69	0.6571	0.4853	0.5017	0.4681	0.4965	0.4706	0.4739	0.7816	0.5057	0.6181	0.5515	0.5602	0.3532	0.3339	0.6479	0.3161	0.596	0.7196	0.7106	0.4923	0.431	0.4445	0.6523	0.5495	0.5727	0.6554
cg20147326	0.1423	0.1237	0.2193	0.1139	0.1085	0.1341	0.1527	0.1297	0.07	0.2669	0.1226	0.1088	0.2648	0.6053	0.1313	0.1209	0.1639	0.2575	0.1321	0.2851	0.1819	0.5965	0.1976	0.1902	0.3758	0.109	0.2327	0.2588	0.0872	0.0892	0.1218	0.2423	0.3846	0.0916	0.2562	0.326	0.0747	0.1029	0.1795	0.2887	0.7444	0.6347	0.167	0.1717	0.2442	0.1517	0.2829	0.3089	0.1758
cg07687814	0.0557	0.0297	0.0175	0.014	0.0188	0.0155	0.0163	0.0326	0.0264	0.0173	0.0164	0.0178	0.0264	0.0343	0.0255	0.0249	0.0153	0.0233	0.0217	0.0279	0.0157	0.0255	0.0175	0.0297	0.0339	0.015	0.0188	0.018	0.0259	0.0188	0.0221	0.0147	0.0167	0.0252	0.0137	0.0174	0.0277	0.0179	0.0205	0.0269	0.016	0.0187	0.0261	0.0146	0.0146	0.0167	0.0185	0.0369	0.0236
cg16983627	0.9243	0.9346	0.9528	0.8364	0.8851	0.9075	0.5861	0.3574	0.9016	0.9635	0.9398	0.8916	0.3616	0.3618	0.5363	0.9047	0.9248	0.6806	0.6564	0.4411	0.9647	0.898	0.7732	0.9316	0.4449	0.8588	0.9403	0.9299	0.8282	0.8932	0.9362	0.6855	0.8541	0.9141	0.6067	0.8425	0.9354	0.8925	0.7774	0.8234	0.914	0.7572	0.9457	0.3097	0.6396	0.9446	0.7108	0.6682	0.7094
cg15300856	0.0275	0.031	0.048	0.0274	0.0347	0.0911	0.0474	0.0355	0.034	0.0455	0.0949	0.036	0.0429	0.3599	0.0386	0.0647	0.2828	0.0424	0.032	0.0316	0.0336	0.0543	0.0347	0.0314	0.2834	0.0436	0.0507	0.0266	0.0767	0.0341	0.0257	0.0367	0.0765	0.0237	0.0312	0.0505	0.0334	0.0255	0.0379	0.0404	0.0835	0.2493	0.0461	0.0254	0.0328	0.033	0.0412	0.05	0.3596
cg23222406	0.7614	0.5059	0.8438	0.53	0.3364	0.5996	0.6647	0.1448	0.3042	0.6786	0.6244	0.5053	0.383	0.1084	0.7658	0.4658	0.558	0.3264	0.5569	0.1659	0.8321	0.4619	0.2263	0.8473	0.6471	0.4846	0.6314	0.4559	0.6874	0.4913	0.2883	0.4361	0.4165	0.4961	0.4488	0.4966	0.3777	0.7979	0.5691	0.1392	0.2536	0.3438	0.7882	0.1475	0.4791	0.6766	0.707	0.3332	0.2742
cg17306261	0.0819	0.0479	0.0312	0.0329	0.0457	0.0307	0.4758	0.0509	0.0774	0.0345	0.4151	0.0253	0.0566	0.9527	0.3108	0.0562	0.0543	0.0342	0.0399	0.0512	0.0247	0.5905	0.0321	0.1272	0.1086	0.2034	0.026	0.0361	0.0449	0.0308	0.0328	0.0422	0.1331	0.0412	0.0352	0.0383	0.0441	0.0407	0.044	0.0258	0.8004	0.8341	0.0597	0.0462	0.0284	0.042	0.23	0.0495	0.138
cg26111030	0.0164	0.0212	0.015	0.0115	0.0087	0.0102	0.0121	0.0173	0.0147	0.0124	0.3856	0.0174	0.0144	0.9365	0.0146	0.0168	0.0102	0.0102	0.0138	0.0126	0.0166	0.0177	0.0131	0.0163	0.0403	0.0155	0.0173	0.0252	0.0139	0.0135	0.0125	0.0116	0.0112	0.0138	0.0083	0.0138	0.0137	0.0113	0.0112	0.012	0.6318	0.6937	0.0131	0.0207	0.0114	0.0146	0.011	0.1057	0.1089
cg19367388	0.0597	0.0277	0.026	0.0203	0.0343	0.0225	0.0303	0.0329	0.0246	0.0271	0.0275	0.0292	0.0287	0.0282	0.0287	0.0407	0.0422	0.0322	0.025	0.0355	0.0242	0.0303	0.0354	0.0244	0.0155	0.0298	0.0283	0.0297	0.0157	0.031	0.0353	0.0336	0.035	0.0241	0.0267	0.0287	0.0248	0.0283	0.0319	0.0277	0.0433	0.0279	0.0317	0.0249	0.0293	0.0321	0.0357	0.0393	0.0326
cg06190732	0.6311	0.8182	0.4802	0.3381	0.5988	0.1152	0.6927	0.1656	0.6151	0.4117	0.6602	0.3426	0.3174	0.0964	0.5893	0.6855	0.741	0.7711	0.61	0.2995	0.4807	0.3765	0.3823	0.5083	0.2387	0.5428	0.368	0.5333	0.7816	0.4034	0.4714	0.4734	0.4968	0.5926	0.2881	0.4104	0.7787	0.3725	0.5578	0.2435	0.8763	0.8978	0.6526	0.3697	0.3169	0.4007	0.3934	0.3591	0.3701
cg13994730	0.0558	0.0623	0.0499	0.0379	0.0552	0.052	0.0517	0.0789	0.0683	0.0624	0.0594	0.0423	0.0733	0.0732	0.0566	0.0627	0.0588	0.0586	0.0437	0.071	0.0388	0.0522	0.0466	0.063	0.0687	0.0528	0.0582	0.0777	0.0456	0.0376	0.0595	0.0584	0.0684	0.0646	0.0549	0.0573	0.074	0.0655	0.0574	0.0632	0.0597	0.0587	0.0658	0.054	0.0725	0.0488	0.0416	0.0652	0.0866
cg15424250	0.1158	0.0895	0.0346	0.0409	0.0365	0.0666	0.0848	0.0307	0.0222	0.0214	0.1007	0.0258	0.0643	0.8385	0.0493	0.0323	0.5739	0.1253	0.0315	0.0238	0.0592	0.0583	0.0475	0.4386	0.1346	0.032	0.0368	0.0392	0.0318	0.0363	0.0534	0.0387	0.0235	0.0272	0.0432	0.0153	0.0245	0.0352	0.0243	0.0407	0.5337	0.6142	0.1238	0.0208	0.0714	0.0472	0.0731	0.2246	0.2458
cg14165978	0.2914	0.5865	0.5716	0.1036	0.324	0.6186	0.6153	0.8664	0.8642	0.5712	0.8645	0.6754	0.7631	0.8831	0.885	0.2621	0.9163	0.9194	0.3938	0.8915	0.1386	0.509	0.8407	0.8607	0.6323	0.7663	0.5882	0.5418	0.6875	0.8473	0.8906	0.7019	0.599	0.6274	0.5569	0.6672	0.8205	0.2455	0.3735	0.7669	0.9225	0.915	0.8419	0.6788	0.7132	0.8835	0.6959	0.5525	0.6067
cg20411801	0.8963	0.9396	0.9368	0.9208	0.9193	0.9137	0.9121	0.9308	0.8906	0.922	0.9199	0.9138	0.9304	0.7461	0.8989	0.9269	0.9335	0.7625	0.9211	0.921	0.9437	0.9314	0.8362	0.9252	0.9118	0.9014	0.8794	0.9139	0.913	0.9185	0.9304	0.9355	0.9143	0.9289	0.8197	0.9434	0.9136	0.9341	0.9269	0.8848	0.8886	0.9202	0.9399	0.9195	0.91	0.9252	0.9194	0.9076	0.8788
cg08960830	0.8722	0.7913	0.8779	0.8548	0.8623	0.8265	0.8665	0.504	0.8942	0.8017	0.8137	0.8763	0.8992	0.3404	0.6464	0.7739	0.9167	0.8291	0.8612	0.7542	0.9006	0.8583	0.8486	0.8838	0.8968	0.7765	0.8512	0.8225	0.7696	0.8795	0.8351	0.838	0.854	0.8755	0.5308	0.9043	0.8405	0.8828	0.7426	0.9106	0.8929	0.8668	0.8731	0.7982	0.7806	0.8934	0.8506	0.7871	0.7914
cg07492924	0.4257	0.5701	0.646	0.7558	0.386	0.686	0.3929	0.1109	0.6959	0.5228	0.7021	0.3836	0.1801	0.1979	0.1425	0.6231	0.8908	0.0584	0.7125	0.0861	0.6285	0.407	0.315	0.7012	0.4136	0.5247	0.553	0.3777	0.5481	0.277	0.6952	0.5424	0.2935	0.5324	0.4501	0.5924	0.4276	0.8389	0.4571	0.09	0.4116	0.1858	0.3606	0.1319	0.4368	0.28	0.5378	0.2373	0.4688
cg26255649	0.0104	0.0144	0.0166	0.0107	0.0114	0.0118	0.014	0.0155	0.015	0.0143	0.0127	0.0141	0.0194	0.0185	0.012	0.0169	0.014	0.0121	0.0134	0.0182	0.0151	0.0164	0.0149	0.0152	0.0089	0.0127	0.0129	0.011	0.01	0.0161	0.0143	0.0136	0.0201	0.0155	0.0115	0.0155	0.0146	0.0144	0.0112	0.0139	0.0152	0.0109	0.014	0.0119	0.0146	0.014	0.0185	0.0151	0.0168
cg03675884	0.0158	0.0127	0.0103	0.0088	0.0093	0.0078	0.0149	0.0165	0.0093	0.012	0.3624	0.014	0.0093	0.0107	0.0125	0.0103	0.01	0.0096	0.0122	0.0113	0.0114	0.0113	0.0147	0.0096	0.0266	0.0132	0.0124	0.008	0.0095	0.013	0.01	0.0119	0.0116	0.0109	0.0089	0.0112	0.0107	0.0162	0.0091	0.0128	0.0092	0.0134	0.0096	0.0087	0.0096	0.0137	0.0119	0.0156	0.0105
cg23337631	0.7867	0.6416	0.3661	0.3966	0.7882	0.725	0.5229	0.8091	0.9173	0.6529	0.7202	0.6317	0.528	0.9028	0.1827	0.7003	0.6186	0.6165	0.6667	0.6678	0.407	0.7424	0.7494	0.4168	0.4967	0.378	0.5137	0.5875	0.7176	0.251	0.6064	0.6953	0.6486	0.8427	0.4388	0.5446	0.249	0.8178	0.6257	0.8413	0.8042	0.8407	0.297	0.8464	0.7292	0.6711	0.5919	0.7587	0.775
cg07898899	0.0755	0.0691	0.098	0.0155	0.0966	0.028	0.0753	0.0733	0.0248	0.0813	0.3745	0.0413	0.111	0.3506	0.0771	0.1628	0.2449	0.2045	0.1791	0.0596	0.0777	0.0862	0.0753	0.0628	0.0411	0.0313	0.0968	0.0985	0.2629	0.1759	0.0594	0.1101	0.111	0.0813	0.2382	0.0837	0.0681	0.0518	0.0339	0.0958	0.6572	0.5705	0.0398	0.08	0.0549	0.0437	0.0846	0.2724	0.0636
cg17374534	0.4483	0.0174	0.0106	0.01	0.0113	0.0095	0.0141	0.0148	0.014	0.0119	0.0118	0.0164	0.0134	0.3579	0.0132	0.0145	0.0101	0.0118	0.0136	0.013	0.0107	0.0164	0.0157	0.0135	0.0322	0.0147	0.0146	0.01	0.0104	0.014	0.0143	0.0113	0.0132	0.014	0.0099	0.0123	0.0164	0.0127	0.0128	0.0114	0.1606	0.0096	0.0117	0.0093	0.0114	0.0126	0.0096	0.0162	0.0149
cg06303875	0.5325	0.1712	0.5244	0.6639	0.108	0.5638	0.0656	0.335	0.1598	0.6495	0.1204	0.8296	0.1322	0.0897	0.0556	0.5602	0.6187	0.1269	0.4697	0.1222	0.3664	0.6663	0.65	0.5293	0.6204	0.4433	0.3338	0.4249	0.2325	0.2917	0.3588	0.114	0.3304	0.5105	0.1639	0.2255	0.3537	0.1741	0.1258	0.052	0.2081	0.2002	0.5736	0.0723	0.4125	0.1277	0.4671	0.5014	0.2954
cg14831838	0.0545	0.1004	0.0444	0.025	0.0247	0.0322	0.0391	0.0295	0.0335	0.0442	0.0205	0.0334	0.0319	0.0356	0.0286	0.0393	0.0265	0.0437	0.0321	0.0343	0.0437	0.0263	0.038	0.0366	0.0253	0.0289	0.0342	0.0358	0.0294	0.0356	0.0296	0.0302	0.0391	0.2921	0.0315	0.0457	0.028	0.0288	0.0298	0.0293	0.0396	0.0254	0.029	0.0289	0.0407	0.0461	0.0376	0.0516	0.0271
cg07787240	0.6713	0.5307	0.5569	0.4132	0.5926	0.7975	0.6004	0.2109	0.6756	0.4478	0.5003	0.671	0.2725	0.1978	0.535	0.415	0.4016	0.4609	0.4791	0.2537	0.7039	0.742	0.383	0.7945	0.6323	0.3749	0.5385	0.4182	0.7162	0.664	0.6996	0.6222	0.5651	0.3992	0.2867	0.7856	0.6685	0.8367	0.6475	0.4645	0.4842	0.481	0.8111	0.4244	0.3669	0.5939	0.6933	0.4111	0.232
cg00782174	0.0264	0.0295	0.0456	0.0406	0.0342	0.0299	0.0378	0.0333	0.0398	0.0372	0.0512	0.0329	0.0415	0.0737	0.0386	0.0768	0.0325	0.037	0.0377	0.0451	0.0399	0.0512	0.0442	0.036	0.034	0.0329	0.0307	0.0354	0.0257	0.0463	0.0703	0.0419	0.0452	0.0561	0.0322	0.046	0.0507	0.0491	0.0321	0.0487	0.0501	0.0422	0.0465	0.0438	0.0329	0.0426	0.0676	0.0377	0.0649
cg15746719	0.0141	0.0228	0.0196	0.0141	0.0185	0.0132	0.0182	0.0183	0.0206	0.027	0.0131	0.0176	0.0147	0.6195	0.018	0.0194	0.016	0.017	0.0228	0.0146	0.0181	0.0223	0.0201	0.0222	0.0146	0.0151	0.0165	0.0162	0.0133	0.0161	0.0145	0.079	0.0276	0.0164	0.3024	0.0211	0.015	0.0169	0.0169	0.0155	0.7679	0.6971	0.0192	0.0133	0.0227	0.0237	0.2634	0.246	0.0897
cg25987077	0.013	0.018	0.0189	0.0154	0.015	0.0134	0.0175	0.0163	0.0134	0.0171	0.0138	0.0212	0.017	0.0171	0.0155	0.0205	0.0154	0.0152	0.0168	0.0178	0.0201	0.0177	0.0183	0.0158	0.0144	0.0167	0.0171	0.0145	0.0145	0.0199	0.0154	0.0205	0.0184	0.0169	0.0157	0.0195	0.0179	0.0185	0.016	0.0169	0.0206	0.0132	0.0152	0.0126	0.0176	0.0196	0.016	0.0178	0.0147
cg09410234	0.1185	0.1002	0.111	0.0392	0.0571	0.1497	0.0767	0.069	0.0874	0.0612	0.0424	0.0593	0.0298	0.1436	0.0706	0.0552	0.1389	0.0649	0.0513	0.0331	0.0715	0.0466	0.2763	0.3766	0.4479	0.0528	0.0496	0.0626	0.0394	0.0384	0.0883	0.0452	0.0768	0.0354	0.0437	0.0767	0.2744	0.0633	0.4628	0.0455	0.1575	0.0596	0.1573	0.0504	0.0608	0.1299	0.0639	0.4001	0.0385
cg21209113	0.0931	0.1375	0.11	0.1228	0.3185	0.1297	0.1831	0.3288	0.0437	0.1185	0.1097	0.0866	0.3937	0.714	0.1283	0.0626	0.0647	0.3583	0.0332	0.4017	0.1111	0.0603	0.1423	0.0882	0.0402	0.1775	0.0637	0.4471	0.1837	0.3145	0.0752	0.2742	0.1826	0.0839	0.3104	0.1488	0.0906	0.0571	0.2343	0.2209	0.2457	0.1818	0.0649	0.2852	0.0962	0.1557	0.1207	0.1932	0.0757
cg18614984	0.0196	0.0199	0.0278	0.017	0.021	0.0155	0.0251	0.0231	0.0222	0.023	0.0225	0.0199	0.0211	0.4873	0.0246	0.0224	0.0155	0.0162	0.0209	0.0217	0.0247	0.0361	0.0265	0.026	0.0175	0.0172	0.0188	0.0193	0.0204	0.0256	0.0326	0.0277	0.0309	0.0212	0.0201	0.0261	0.0245	0.0368	0.0247	0.0193	0.1468	0.0244	0.0247	0.0161	0.0277	0.0227	0.0273	0.0201	0.028
cg19972858	0.0733	0.0814	0.0945	0.0949	0.0504	0.0528	0.0916	0.0622	0.1034	0.1	0.0785	0.0818	0.0785	0.0615	0.0703	0.0973	0.0763	0.0518	0.0677	0.0736	0.1032	0.0706	0.0769	0.0922	0.0523	0.0663	0.0735	0.0484	0.0765	0.0958	0.0663	0.0858	0.0755	0.0722	0.0666	0.077	0.0897	0.0705	0.0819	0.0726	0.031	0.0502	0.0738	0.0486	0.0801	0.0761	0.084	0.0739	0.0688
cg20624923	0.4038	0.2461	0.614	0.6867	0.21	0.07	0.1177	0.0899	0.7904	0.4833	0.1529	0.0706	0.0579	0.0662	0.06	0.2005	0.071	0.0323	0.1938	0.0823	0.6869	0.2511	0.284	0.661	0.0632	0.4418	0.1572	0.178	0.2354	0.0725	0.2287	0.2906	0.1742	0.1839	0.1509	0.2563	0.122	0.6657	0.2868	0.2279	0.1032	0.0954	0.3591	0.1219	0.5664	0.2664	0.1466	0.2541	0.1062
cg22725719	0.0211	0.0445	0.037	0.0346	0.0359	0.0278	0.0298	0.0505	0.0683	0.0372	0.0399	0.0331	0.0444	0.0429	0.0428	0.0347	0.0354	0.029	0.0246	0.0389	0.0352	0.0381	0.0417	0.0162	0.0383	0.0285	0.0268	0.0417	0.0375	0.0386	0.031	0.0356	0.0357	0.0443	0.0455	0.0287	0.0353	0.0429	0.0398	0.0447	0.0421	0.0422	0.0464	0.0317	0.0365	0.0395	0.0359	0.0533	0.0402
cg01924644	0.2152	0.2497	0.4426	0.3816	0.1357	0.2247	0.2094	0.1879	0.2291	0.291	0.1464	0.2709	0.1275	0.1714	0.0805	0.1922	0.1362	0.1026	0.1969	0.0925	0.3244	0.3622	0.2172	0.3106	0.1313	0.2041	0.2474	0.1643	0.2628	0.2203	0.2089	0.2395	0.2382	0.2526	0.1767	0.2922	0.2242	0.4238	0.1985	0.1144	0.274	0.1527	0.2559	0.1046	0.2855	0.295	0.2392	0.1366	0.4487
cg07849972	0.045	0.0883	0.0717	0.0432	0.0413	0.0386	0.0476	0.1479	0.094	0.0561	0.036	0.041	0.0526	0.054	0.0686	0.0903	0.0446	0.0366	0.0416	0.0478	0.0516	0.0603	0.0565	0.0509	0.0351	0.0375	0.0398	0.0338	0.0462	0.0489	0.0495	0.0461	0.05	0.0656	0.0436	0.0484	0.0475	0.0558	0.0427	0.0435	0.0591	0.0532	0.0591	0.0336	0.0476	0.057	0.05	0.1138	0.0634
cg19248656	0.0445	0.0194	0.019	0.0134	0.0133	0.0164	0.0188	0.2945	0.0151	0.0159	0.0165	0.0185	0.015	0.0139	0.018	0.0153	0.015	0.0126	0.0147	0.0151	0.0175	0.0142	0.1742	0.0585	0.0179	0.0178	0.019	0.0134	0.0156	0.0158	0.0159	0.0159	0.0176	0.0158	0.0132	0.0966	0.0157	0.0141	0.0142	0.0182	0.0216	0.0129	0.0166	0.0129	0.0218	0.0169	0.0181	0.4709	0.016
cg03583111	0.4103	0.311	0.1666	0.2831	0.4621	0.149	0.3785	0.3655	0.6139	0.3034	0.3386	0.4572	0.5692	0.7497	0.2723	0.1708	0.4771	0.3175	0.1274	0.3039	0.2914	0.5557	0.4467	0.2744	0.4298	0.274	0.1403	0.3218	0.2021	0.232	0.3069	0.2828	0.4535	0.399	0.3765	0.2309	0.3937	0.315	0.2028	0.3508	0.6548	0.6095	0.3955	0.2022	0.3308	0.3275	0.3433	0.4092	0.5667
cg08827700	0.9122	0.9034	0.8745	0.8393	0.8449	0.8651	0.8118	0.6645	0.8919	0.8693	0.5396	0.8536	0.8488	0.5606	0.8137	0.8253	0.8817	0.7949	0.8202	0.7779	0.9125	0.8403	0.8171	0.8734	0.8737	0.7928	0.8341	0.6589	0.8262	0.859	0.8851	0.8771	0.8576	0.9062	0.777	0.8627	0.858	0.8553	0.7463	0.8432	0.772	0.807	0.8787	0.7824	0.8254	0.8842	0.8537	0.8123	0.7341
cg17133183	0.1295	0.3412	0.0878	0.1907	0.059	0.4357	0.0923	0.3966	0.098	0.0682	0.3719	0.0648	0.0626	0.3364	0.0484	0.1132	0.5093	0.1878	0.05	0.0668	0.2003	0.375	0.0845	0.4057	0.1053	0.161	0.1537	0.2323	0.0391	0.0737	0.0684	0.0781	0.3693	0.3383	0.3047	0.0767	0.7819	0.2391	0.0583	0.0873	0.0802	0.2307	0.1544	0.07	0.1813	0.705	0.0724	0.6383	0.7479
cg01941814	0.9086	0.9056	0.8854	0.8812	0.8741	0.8931	0.9126	0.9211	0.9046	0.9068	0.8381	0.8577	0.8847	0.9286	0.8566	0.8808	0.9135	0.8982	0.889	0.915	0.8859	0.9167	0.9019	0.9302	0.8635	0.8616	0.879	0.8627	0.9312	0.9018	0.9281	0.8829	0.9077	0.9034	0.932	0.9212	0.913	0.9032	0.8943	0.88	0.9092	0.845	0.9138	0.8684	0.8938	0.8831	0.9082	0.8856	0.8915
cg14316118	0.1029	0.0699	0.0459	0.0546	0.0606	0.0591	0.0583	0.072	0.0783	0.046	0.0594	0.0384	0.059	0.0342	0.0736	0.0747	0.0636	0.0465	0.0358	0.0497	0.0424	0.0429	0.0328	0.0486	0.0328	0.0416	0.0402	0.0573	0.0608	0.0428	0.0467	0.064	0.049	0.0414	0.2281	0.065	0.0332	0.0335	0.0396	0.0555	0.4869	0.0604	0.0433	0.056	0.0508	0.0546	0.0482	0.1058	0.0575
cg03061352	0.0607	0.0504	0.0559	0.0349	0.0322	0.0546	0.099	0.0383	0.0366	0.0625	0.0933	0.0369	0.071	0.8154	0.0615	0.0462	0.0906	0.0444	0.0385	0.0416	0.0551	0.0461	0.4799	0.0417	0.0407	0.0624	0.0405	0.0625	0.0558	0.0371	0.0347	0.096	0.1055	0.0281	0.1117	0.0444	0.0406	0.156	0.0381	0.0311	0.4811	0.1668	0.0552	0.033	0.0684	0.0715	0.0616	0.0897	0.0495
cg04635138	0.0362	0.0463	0.0389	0.0244	0.0477	0.0291	0.0361	0.066	0.0418	0.0453	0.0698	0.0329	0.0461	0.0357	0.0372	0.0548	0.0519	0.0441	0.0442	0.0332	0.0326	0.0347	0.0469	0.1409	0.0717	0.0371	0.0543	0.0451	0.0624	0.0474	0.0368	0.0395	0.0342	0.0376	0.0369	0.058	0.0359	0.0386	0.0418	0.0425	0.3412	0.028	0.0304	0.034	0.0495	0.0395	0.0763	0.057	0.0346
cg09873772	0.659	0.6128	0.5918	0.7764	0.3068	0.3416	0.4495	0.2819	0.251	0.4648	0.7539	0.2572	0.1453	0.0681	0.4513	0.3863	0.2984	0.0686	0.462	0.1242	0.7529	0.3832	0.4263	0.7909	0.2864	0.4784	0.4783	0.4166	0.7389	0.3325	0.1864	0.3991	0.2875	0.4088	0.222	0.3273	0.4475	0.7898	0.4875	0.1602	0.3244	0.2055	0.2573	0.1469	0.2655	0.7457	0.5691	0.6672	0.1901
cg01309153	0.8409	0.6489	0.8359	0.7506	0.6325	0.8282	0.5905	0.6376	0.8139	0.8368	0.6256	0.7899	0.514	0.7882	0.5431	0.6535	0.8523	0.563	0.7948	0.3951	0.8929	0.7044	0.6895	0.7968	0.9492	0.8075	0.7853	0.6808	0.8005	0.8156	0.8594	0.7935	0.7911	0.837	0.364	0.8176	0.813	0.8196	0.7115	0.5986	0.865	0.6521	0.8165	0.6406	0.7786	0.8536	0.8564	0.7745	0.6777
cg07902983	0.1896	0.6063	0.6597	0.8217	0.1604	0.6713	0.1019	0.0659	0.1422	0.4882	0.1428	0.5278	0.1221	0.1041	0.0667	0.323	0.8147	0.2607	0.4137	0.1292	0.8944	0.7365	0.1385	0.5029	0.1367	0.1673	0.6072	0.5641	0.544	0.1231	0.3218	0.6296	0.3323	0.5997	0.3193	0.452	0.6191	0.7074	0.5704	0.0977	0.4161	0.2404	0.6178	0.0973	0.2168	0.4816	0.2648	0.198	0.4397
cg24998096	0.0823	0.0518	0.0983	0.0707	0.0799	0.0748	0.0936	0.0759	0.0773	0.12	0.0709	0.0569	0.0774	0.8823	0.0587	0.0898	0.077	0.0688	0.0664	0.0933	0.087	0.1591	0.086	0.13	0.0631	0.3451	0.0938	0.0667	0.1014	0.067	0.0871	0.1075	0.11	0.0799	0.0597	0.1143	0.1232	0.0713	0.0762	0.0898	0.8064	0.7558	0.0744	0.0614	0.1215	0.0936	0.4014	0.0774	0.0878
cg09361488	0.1378	0.0486	0.0501	0.031	0.0291	0.0281	0.0362	0.4585	0.0681	0.0394	0.0378	0.041	0.049	0.3238	0.0402	0.0371	0.0349	0.0322	0.0309	0.0394	0.0234	0.0461	0.0527	0.08	0.03777	0.0421	0.0354	0.0784	0.0355	0.0455	0.046	0.0276	0.0481	0.0595	0.0594	0.0306	0.0613	0.0378	0.0429	0.0432	0.0652	0.0471	0.0719	0.0287	0.0316	0.0484	0.0309	0.0675	0.0555
cg17130504	0.0218	0.0229	0.0221	0.0197	0.0134	0.0221	0.0227	0.0257	0.0315	0.0187	0.0235	0.0267	0.0337	0.9793	0.0283	0.0237	0.0134	0.0108	0.0198	0.0291	0.014	0.0222	0.0182	0.0355	0.0944	0.0276	0.0231	0.0171	0.0165	0.0378	0.0284	0.0193	0.0131	0.033	0.0137	0.018	0.0274	0.0279	0.0159	0.0366	0.788	0.5698	0.0312	0.0187	0.0166	0.0225	0.0192	0.025	0.0293
cg01747263	0.0477	0.0454	0.0391	0.0366	0.0615	0.0294	0.051	0.0465	0.0732	0.0394	0.0542	0.032	0.0331	0.0376	0.0414	0.0443	0.0605	0.0618	0.0318	0.0332	0.037	0.069	0.0506	0.0493	0.0592	0.0287	0.036	0.0271	0.0463	0.0354	0.0261	0.0347	0.0414	0.0466	0.0387	0.0402	0.0485	0.039	0.0341	0.0285	0.3586	0.2655	0.0384	0.0368	0.0434	0.0476	0.044	0.0388	0.0421
cg23039279	0.0407	0.2684	0.075	0.0364	0.0434	0.04	0.0712	0.0523	0.0562	0.0797	0.0461	0.0445	0.0403	0.0452	0.0542	0.0549	0.0562	0.0655	0.0519	0.0388	0.0553	0.0481	0.0607	0.0383	0.0248	0.0548	0.0548	0.0397	0.0385	0.0485	0.2033	0.0664	0.0667	0.0435	0.0409	0.0605	0.0351	0.0235	0.0388	0.04	0.07	0.038	0.0475	0.0397	0.0822	0.0508	0.0812	0.0676	0.0527
cg06786050	0.8105	0.7069	0.79	0.9141	0.8166	0.8749	0.8414	0.896	0.9115	0.8708	0.8451	0.7603	0.8276	0.9479	0.9109	0.7433	0.9044	0.8788	0.8206	0.8983	0.835	0.7464	0.8282	0.859	0.8447	0.682	0.7158	0.8215	0.6663	0.8503	0.9117	0.8363	0.7984	0.8811	0.8125	0.7344	0.5305	0.8867	0.6163	0.8635	0.9045	0.8509	0.8717	0.8128	0.859	0.8574	0.8323	0.831	0.8786
cg03220633	0.0311	0.0292	0.0272	0.0246	0.0294	0.0232	0.0243	0.0306	0.0301	0.0271	0.0314	0.0219	0.0342	0.028	0.0247	0.0375	0.0285	0.0244	0.0272	0.0303	0.0262	0.0722	0.0295	0.0323	0.0211	0.0235	0.0227	0.0247	0.0313	0.0263	0.0382	0.0249	0.0267	0.0357	0.0248	0.0312	0.0285	0.0366	0.0244	0.0298	0.0292	0.185	0.0267	0.0211	0.0287	0.0457	0.0317	0.0297	0.034
cg10498900	0.1811	0.0494	0.0349	0.0414	0.0355	0.0346	0.0347	0.0602	0.0652	0.0402	0.0527	0.0461	0.1069	0.0683	0.0477	0.0603	0.0342	0.0389	0.0404	0.0575	0.0409	0.0897	0.0328	0.0694	0.0545	0.0463	0.0504	0.0434	0.1083	0.065	0.0814	0.0329	0.029	0.0867	0.0555	0.0386	0.065	0.073	0.0478	0.0577	0.0346	0.0403	0.0649	0.0446	0.0309	0.036	0.038	0.0579	0.0693
cg05629195	0.8744	0.9312	0.8549	0.7932	0.8369	0.6115	0.8986	0.3498	0.9481	0.8067	0.6907	0.7171	0.2363	0.3947	0.89	0.6171	0.7853	0.2434	0.7396	0.1798	0.6458	0.3926	0.458	0.8771	0.8819	0.8986	0.7478	0.7583	0.9043	0.9392	0.7328	0.8368	0.4832	0.8849	0.4258	0.6048	0.8838	0.9282	0.8166	0.5183	0.373	0.306	0.8475	0.225	0.3052	0.6133	0.8033	0.7155	0.5508
cg22924867	0.4582	0.6521	0.4401	0.5082	0.3396	0.585	0.6105	0.812	0.6067	0.429	0.3611	0.3439	0.3659	0.5792	0.4381	0.5042	0.9137	0.5222	0.509	0.5411	0.6087	0.6329	0.7009	0.643	0.0569	0.5378	0.5717	0.4886	0.4515	0.6597	0.3792	0.4048	0.5908	0.6368	0.4551	0.4778	0.5675	0.5489	0.6343	0.6717	0.5244	0.4688	0.6206	0.6089	0.3898	0.4506	0.5732	0.4552	0.4234
cg25377605	0.8495	0.8589	0.9351	0.8837	0.8986	0.9097	0.8914	0.7586	0.9107	0.9233	0.7221	0.9254	0.8432	0.6005	0.5934	0.8411	0.9323	0.5832	0.9038	0.7884	0.954	0.8856	0.8551	0.9082	0.8184	0.8825	0.912	0.9095	0.8454	0.9372	0.8985	0.9529	0.9402	0.894	0.8295	0.8606	0.8812	0.8855	0.8029	0.8257	0.916	0.8886	0.9021	0.7999	0.8922	0.9275	0.9439	0.8895	0.7143
cg22692964	0.1084	0.0605	0.0617	0.0656	0.0837	0.0478	0.0565	0.082	0.0505	0.061	0.0614	0.0413	0.091	0.079	0.0547	0.0686	0.0626	0.0428	0.0374	0.0408	0.048	0.0537	0.0525	0.0521	0.0461	0.0425	0.0385	0.045	0.0649	0.0397	0.0428	0.0556	0.0844	0.0672	0.0715	0.0511	0.0327	0.056	0.059	0.0357	0.0643	0.1192	0.0487	0.0622	0.059	0.0537	0.0485	0.0684	0.0468
cg15020611	0.0197	0.0162	0.0191	0.019	0.015	0.0191	0.0152	0.0218	0.021	0.0156	0.0138	0.0179	0.0197	0.0618	0.0164	0.0182	0.0179	0.0176	0.0183	0.0172	0.0151	0.017	0.0178	0.0171	0.0502	0.0162	0.0176	0.0153	0.0179	0.0248	0.0233	0.021	0.0146	0.0175	0.0151	0.0141	0.0185	0.0161	0.0145	0.0153	0.1744	0.1182	0.0182	0.0189	0.0138	0.0184	0.0162	0.0176	0.0209
cg08009622	0.0782	0.0763	0.0613	0.0667	0.0617	0.0514	0.068	0.0759	0.0731	0.0594	0.1821	0.0957	0.0565	0.4871	0.0559	0.0889	0.631	0.0701	0.0678	0.0557	0.0852	0.0747	0.0524	0.0641	0.0422	0.0538	0.0614	0.0847	0.0933	0.0644	0.0543	0.0584	0.0906	0.0551	0.0995	0.0949	0.0622	0.0729	0.0811	0.0571	0.089	0.1132	0.0794	0.0582	0.0948	0.0731	0.0705	0.2517	0.0671
cg20200335	0.3579	0.3693	0.358	0.2276	0.2922	0.3296	0.2668	0.2396	0.3778	0.3637	0.3014	0.5576	0.3573	0.186	0.3719	0.3897	0.1258	0.403	0.3295	0.2154	0.5848	0.7561	0.2299	0.665	0.9237	0.3621	0.4483	0.4313	0.6081	0.3789	0.4826	0.3652	0.4725	0.2617	0.3856	0.4217	0.4551	0.3423	0.485	0.3734	0.2728	0.4911	0.3223	0.2189	0.3002	0.4471	0.7016	0.2833	0.2333
cg15747838	0.0955	0.0459	0.0354	0.0303	0.0288	0.0265	0.0388	0.0556	0.0446	0.0384	0.0273	0.0338	0.0578	0.0486	0.0459	0.0366	0.0403	0.0273	0.0315	0.0462	0.0329	0.0633	0.0355	0.0833	0.0839	0.034	0.0414	0.0237	0.0517	0.0486	0.0384	0.0299	0.0377	0.0655	0.0398	0.0303	0.0585	0.0416	0.0388	0.0491	0.0255	0.0337	0.0486	0.0338	0.0284	0.0318	0.026	0.0605	0.0444
cg11944428	0.0555	0.0503	0.0748	0.056	0.049	0.0462	0.0461	0.0461	0.0807	0.0503	0.0837	0.051	0.106	0.224	0.0553	0.0875	0.063	0.0444	0.056	0.0962	0.0535	0.0909	0.04	0.0924	0.034	0.0449	0.0508	0.0477	0.0515	0.0832	0.0751	0.0556	0.0447	0.0857	0.0426	0.0715	0.0579	0.0583	0.0395	0.0848	0.4828	0.2082	0.0744	0.0428	0.0532	0.0498	0.0591	0.0417	0.1072
cg19770541	0.3555	0.1123	0.1077	0.0612	0.0813	0.2124	0.1463	0.5217	0.0751	0.1471	0.173	0.0892	0.1992	0.9427	0.4913	0.3075	0.1848	0.0466	0.4181	0.1393	0.1262	0.632	0.1015	0.126	0.0679	0.1403	0.244	0.0911	0.0621	0.5847	0.6063	0.3022	0.1545	0.0893	0.0575	0.1362	0.0983	0.1065	0.2261	0.2097	0.7189	0.4444	0.1082	0.0595	0.1279	0.5196	0.1091	0.1805	0.5242
[truncated: 10,136 more rows]
[truncated: 20 more columns]
