# Supplementary material for: Integrative analysis of DNA methylation and gene expression to identify key epigenetic genes in glioblastoma
Source: Aging (Albany NY). 2019 Aug 8;11(15):5579–92. doi: 10.18632/aging.102139 (PMC6710056; doi:10.18632/aging.102139)
Supplement: Supplementary Table 5 [file aging-11-102139-s008.xlsx]

## Sheet: Sheet1
Gene Symbol	p-value	FC	FDR	pattern
RNF10	0.00027517	0.966927	0.00241008	down
FGFR1OP2	0.00119924	0.916119	0.00657418	down
ASS1	0.00108883	0.767818	0.00619174	down
HMGCLL1	0.000760046	0.673743	0.00487617	down
GRIN1	0.000353941	0.621653	0.00288694	down
RBMY1A3P	0.00177671	NAN	0.00384808	down
LRRTM2	0.00206907	0.891499	0.00949864	down
CAMKV	0.000914645	0.658971	0.00550181	down
RAB40B	0.00032947	0.79829	0.0027563	down
ATP2A3	1.29e-06	0.876574	2.93e-05	down
DENND4B	0.00034871	0.942336	0.00285921	down
SDK2	0.00176675	0.857002	0.00854853	down
CHST8	0.0003296	0.840913	0.0027563	down
SNORD115-17	0.00177671	NAN	0.00384808	down
LRPAP1	3.33e-05	0.932291	0.000488314	down
HRH3	0.00021074	0.619294	0.00200003	down
ART3	6.29e-07	0.717655	1.54e-05	down
ATP1A3	0.00107702	0.789601	0.00614199	down
MGRN1	0.000911312	0.949315	0.00548497	down
TCP1	0.000657967	0.977092	0.00441008	down
CPEB1	0.000106575	0.779371	0.00121487	down
CPEB2	0.00062968	0.864892	0.0042735	down
BEGAIN	0.00119746	0.686975	0.00656622	down
TLN2	0.000660537	0.83885	0.00442121	down
IFT80	0.00112906	0.904266	0.00631473	down
SLC27A4	3.22e-07	0.891923	8.36e-06	down
PNOC	0.00143023	0.524799	0.00739243	down
SNORD114-31	0.00177671	NAN	0.00384808	down
SNORD114-30	0.00177671	NAN	0.00384808	down
MPHOSPH8	0.000329602	0.927999	0.0027563	down
SNORD115-6	0.00177671	NAN	0.00384808	down
RNF128	0.000669621	0.516704	0.00446342	down
SNORD115-4	0.00177671	NAN	0.00384808	down
KNDC1	0.00156058	0.776145	0.00782769	down
ZFP82	0.00143312	0.948033	0.00739804	down
RTBDN	0.000335306	0.467519	0.00279037	down
EFHA2	0.00149963	0.772248	0.00762654	down
NRXN3	0.000318473	0.67871	0.00268305	down
SNORD104	0.00177671	NAN	0.00384808	down
STXBP6	3.05e-07	0.685883	7.95e-06	down
RUNDC2C	7.91e-06	0.813083	0.000145225	down
STAC2	0.00181833	0.701005	0.00870117	down
GPR78	0.00137465	0.149991	0.00720673	down
STMN1	8.38e-05	0.896008	0.00101099	down
EIF2B3	3.01e-06	0.955828	6.29e-05	down
TTC1	0.00029277	0.966528	0.00252121	down
MYT1L	0.000979619	0.611886	0.00577421	down
C9orf125	0.000284721	0.778102	0.0024697	down
KRTAP2-4	0.00177671	NAN	0.00384808	down
PCDHA6	0.000307855	0.668381	0.00261276	down
PCP4L1	0.0010195	0.60574	0.00592259	down
SNORD115-9	0.00177671	NAN	0.00384808	down
CPLX3	9.45e-07	0.498118	2.23e-05	down
AP2A1	0.000352904	0.898139	0.00288234	down
TUBG2	0.000255476	0.917929	0.00230041	down
PAMR1	0.00150643	0.872264	0.00764717	down
B3GAT1	0.00215385	0.901733	0.00975479	down
CALM2	0.000112701	0.936298	0.0012699	down
DLGAP2	0.00192144	0.551627	0.00903531	down
CLCN6	0.000436235	0.934563	0.00333819	down
CLCN4	2.18e-05	0.790626	0.000345274	down
DNAJA3	0.00138646	0.985672	0.00725617	down
DNAJA4	0.000364705	0.735238	0.00295286	down
LOC643387	0.000612306	0.835491	0.00419371	down
LOC100192379	0.00146273	0.249195	0.00750372	down
C2orf82	0.000952162	0.676433	0.00565407	down
SNORD38A	0.00177671	NAN	0.00384808	down
CISD2	5.23e-05	0.95491	0.00069635	down
P2RX2	0.00166499	0.287736	0.00820504	down
KRTAP19-2	0.00177671	NAN	0.00384808	down
PPIAL4C	0.00086737	0.766344	0.0053128	down
GALNTL5	2.96e-05	0.28785	0.000443868	down
GALNTL6	0.00215785	0.364977	0.0097583	down
SNORD114-3	0.00177671	NAN	0.00384808	down
AVPI1	0.00167047	0.873926	0.00822361	down
VSIG10L	0.00076843	0.805962	0.00490682	down
LRRC24	0.0006844	0.89616	0.00452665	down
LPGAT1	0.00030879	0.851877	0.00261961	down
C14orf138	0.00208368	0.852722	0.00954449	down
NDFIP2	4.97e-05	0.863406	0.000667128	down
SRRM4	0.00190392	0.648055	0.00898593	down
SEC61A2	1.08e-06	0.861451	2.51e-05	down
DDHD2	0.000517917	0.9096	0.00375719	down
MGST3	0.000769125	0.946173	0.00490682	down
SV2B	8.37e-05	0.566161	0.00101099	down
SCN2B	0.000381122	0.715662	0.00305284	down
ATG2B	0.000621597	0.914374	0.00423967	down
NDUFAF1	0.000150183	0.976175	0.00157069	down
2019-03-11	0.00172094	0.455774	0.00839013	down
HBII-52-27	0.00177671	NAN	0.00384808	down
CHD5	0.000395984	0.618055	0.00312916	down
SNORD11	0.00177671	NAN	0.00384808	down
PRKCB	0.000886799	0.736578	0.00538957	down
DYNC1LI1	0.00204712	0.939226	0.00942953	down
TRPC1	0.00152296	0.924603	0.00770088	down
ABCG5	0.0010614	0.702436	0.00608164	down
PRKCZ	3.9e-06	0.764257	7.83e-05	down
SGSM1	0.000787747	0.751944	0.00498841	down
ASPHD1	6.59e-06	0.791007	0.000123641	down
FAM49B	7.17e-11	0.977909	3.02e-09	down
SNORD12	0.00177671	NAN	0.00384808	down
PRKACB	2.52e-05	0.886214	0.000388175	down
HDHD3	0.000336123	0.838001	0.00279328	down
SNORD21	0.00177671	NAN	0.00384808	down
SNORD20	0.00177671	NAN	0.00384808	down
KLHDC5	0.00115127	0.952189	0.00639662	down
SNORD25	0.00177671	NAN	0.00384808	down
KCNK9	0.00123125	0.511036	0.00668189	down
BEX5	0.00035811	0.661102	0.00291283	down
BEX4	2.52e-05	0.917798	0.000388071	down
BEX2	0.000568777	0.832193	0.0039935	down
CRYM	0.000325524	0.552802	0.00273111	down
GRIN2C	2.06e-06	0.79066	4.44e-05	down
GNA14	0.000607394	0.843484	0.00416632	down
PRKAR1A	0.000121239	0.938353	0.00134543	down
SBF1	0.000235416	0.905005	0.00216343	down
TPPP	0.000108316	0.774615	0.00123122	down
SNORD127	0.00177671	NAN	0.00384808	down
OGDH	0.000722073	0.968049	0.00469774	down
LOC100134713	0.000238857	0.752494	0.00218916	down
BCAT1	1.42e-05	0.908123	0.000240834	down
LOC283267	4.23e-07	0.864249	1.07e-05	down
AKAP6	0.000132355	0.90286	0.00143466	down
CYP26A1	4e-05	0.451775	0.000566106	down
PSTK	0.000225147	0.908788	0.00209436	down
SNORD124	0.00177671	NAN	0.00384808	down
RLF	0.00211609	0.959379	0.00964337	down
LOC255167	0.000240308	0.548254	0.0022005	down
TTTY17A	0.00177671	NAN	0.00384808	down
SNORD115-5	0.00177671	NAN	0.00384808	down
C8orf46	0.000820441	0.911285	0.00512313	down
SNORD80	0.00177671	NAN	0.00384808	down
BRF2	0.00104221	0.947407	0.00601303	down
DNAJC6	2.69e-07	0.78404	7.07e-06	down
TMEM179	0.000367923	0.667771	0.00296913	down
ZNF831	0.00108194	0.421954	0.0061632	down
TRIM46	0.00209707	0.839159	0.0095886	down
ATOH7	0.00188802	0.496788	0.00892906	down
MECP2	0.00110685	0.948357	0.0062328	down
RARRES2	2.19e-05	0.828676	0.00034644	down
TRPV6	4.46e-06	0.484886	8.79e-05	down
SLC17A7	3.7e-05	0.61125	0.000532004	down
C16orf52	0.000734567	0.893533	0.00475591	down
CDK17	1.2e-05	0.896244	0.000206418	down
SNORD56B	0.00177671	NAN	0.00384808	down
KCNAB1	0.000490404	0.744777	0.00361638	down
BFSP1	0.00124451	0.577489	0.00672538	down
KCNAB2	0.00121741	0.734869	0.00664046	down
CTNNBIP1	0.00218552	0.952294	0.00983048	down
SNORD78	0.00177671	NAN	0.00384808	down
LRRC47	0.000207648	0.961298	0.0019828	down
B3GNT4	8.1e-05	0.43722	0.000988112	down
B3GNT7	0.00022073	0.746413	0.00206781	down
ADRA2C	0.000535417	0.646642	0.00383401	down
GUK1	7.75e-05	0.950102	0.000956988	down
LRRC4B	0.000351336	0.92619	0.00287472	down
SYT1	0.000339973	0.664058	0.00281324	down
SYT4	0.000313624	0.643944	0.00265076	down
SYT5	0.000190618	0.637449	0.001867	down
SYT7	0.000687873	0.672973	0.0045321	down
SNORD113-7	0.00177671	NAN	0.00384808	down
FAM189A1	0.000574248	0.705596	0.00401587	down
SNORD96A	0.00177671	NAN	0.00384808	down
LOC100130274	0.000448447	0.102219	0.00340734	down
PALM2	5.45e-05	0.653926	0.000721672	down
C1orf52	0.00134932	0.929581	0.00710663	down
C1orf59	0.000142521	0.714879	0.00151231	down
ICMT	0.000938757	0.975605	0.00560151	down
TBK1	0.000981541	0.962616	0.00577895	down
ATP6V0A4	2.34e-06	0.510799	5.02e-05	down
ATP6V0A1	0.000435896	0.883554	0.00333791	down
SLC22A15	0.00185258	0.692419	0.00880607	down
GUCA1A	0.00177788	0.370945	0.00858213	down
C17orf104	0.00207954	0.822844	0.00953168	down
TAOK2	4.66e-11	0.951812	2e-09	down
SNORD119	0.00177671	NAN	0.00384808	down
CELF4	0.000377847	0.659625	0.00302897	down
ATG16L1	0.00012217	0.925257	0.00135341	down
WNT9A	0.000480664	0.57145	0.00357667	down
C15orf62	7.13e-05	0.88289	0.000894514	down
CES8	2.07e-07	0.575564	5.57e-06	down
ENDOU	6.4e-05	0.826524	0.000822943	down
BDH1	0.00105042	0.807212	0.00604242	down
DDX24	0.00155978	0.919233	0.00782557	down
PI4KAP1	0.000161309	0.905635	0.00165088	down
HBII-52-46	0.00177671	NAN	0.00384808	down
HBII-52-45	0.00177671	NAN	0.00384808	down
WSCD2	0.00177587	0.589767	0.00857849	down
FAM153C	0.00023404	0.140189	0.00215561	down
SNORD47	0.00177671	NAN	0.00384808	down
SNORD4B	0.00177671	NAN	0.00384808	down
SNORD4A	0.00177671	NAN	0.00384808	down
SMPDL3B	0.000566846	0.833457	0.00398539	down
STOML1	0.000638672	0.874168	0.00432024	down
NKAIN2	0.000350376	0.703581	0.00286926	down
MAP1A	0.000626136	0.854551	0.00425537	down
UNC5C	0.00171085	0.62536	0.00835086	down
VGF	0.00120755	0.720553	0.0066039	down
CCM2	0.000191538	0.947508	0.0018734	down
MAP1S	0.000748734	0.903375	0.00482321	down
CEND1	0.00167304	0.831237	0.00823091	down
DACT3	0.000501308	0.875295	0.00367435	down
PP14571	6.39e-06	0.5064	0.000120529	down
EPB41L1	0.000406742	0.841549	0.00319031	down
EPB41L3	2.99e-10	0.807988	1.17e-08	down
WNT2	0.00161143	0.49723	0.00801809	down
CNTNAP2	0.000268346	0.729163	0.00237566	down
MRPL34	0.000553273	0.975974	0.00392348	down
SNORD116-24	0.00177671	NAN	0.00384808	down
SNORD116-25	0.00177671	NAN	0.00384808	down
SNORD116-23	0.00177671	NAN	0.00384808	down
SNORD116-29	0.00177671	NAN	0.00384808	down
KLF11	0.00050954	0.959083	0.00371584	down
CXorf40A	0.000824844	0.903574	0.00513218	down
ZRANB1	0.000305042	0.94054	0.0025939	down
ATP9A	0.00101446	0.910514	0.005905	down
APP	0.000734815	0.947878	0.00475591	down
RRAGA	0.000481844	0.96683	0.00358155	down
LRRC61	0.000208734	0.718121	0.00198946	down
DEFB121	0.00177671	NAN	0.00384808	down
PRSS3	0.00117055	0.55914	0.00647223	down
BAIAP3	0.000366873	0.820816	0.0029664	down
SNORD115-8	0.00177671	NAN	0.00384808	down
ACTN2	0.00031696	0.839881	0.00267565	down
RABEP1	9.51e-06	0.949932	0.000170572	down
PTPRU	3.37e-32	0.825049	5.06e-30	down
ANKS1B	1.93e-05	0.770957	0.000310626	down
PTPRR	0.000204949	0.515284	0.00196801	down
ADAM11	0.000418325	0.659918	0.00324084	down
CPNE9	0.00213114	0.451397	0.00968924	down
PTPRF	0.000858186	0.931662	0.0052766	down
CPNE7	0.000176425	0.49581	0.00176323	down
CPNE6	1.38e-05	0.570472	0.000234844	down
SGCZ	0.000399754	0.613446	0.00315531	down
OPALIN	0.00137195	0.560356	0.00719626	down
PTPRK	0.00081306	0.887926	0.00509955	down
PTPRJ	3.48e-06	0.965574	7.13e-05	down
ZFR2	0.00133759	0.638654	0.00705569	down
ZDHHC14	0.0016444	0.910686	0.00813482	down
PCSK2	0.00161861	0.710938	0.00804602	down
HIPK4	0.000402783	0.380865	0.00316997	down
DUSP22	0.00217669	0.924145	0.00980644	down
DUSP26	0.000273035	0.869777	0.00239958	down
DUSP27	0.00125172	0.749512	0.00674547	down
NAPA	0.000788349	0.924485	0.00498915	down
C3orf14	0.000868441	0.842563	0.00531735	down
LARP1	0.00106813	0.938806	0.00610555	down
PTER	0.000258887	0.588412	0.00231689	down
ATMIN	0.00103886	0.95979	0.00599603	down
ELAVL2	0.00139805	0.718118	0.00728474	down
ELAVL3	0.000728201	0.87778	0.0047325	down
SNORD66	0.00177671	NAN	0.00384808	down
HBII-52-28	0.00177671	NAN	0.00384808	down
SNORD69	0.00177671	NAN	0.00384808	down
SNORD68	0.00177671	NAN	0.00384808	down
APOB	0.000451883	0.561231	0.00342377	down
SNORD38B	0.00177671	NAN	0.00384808	down
GPHN	0.00192384	0.949453	0.00904015	down
ZMIZ2	0.00114217	0.945931	0.00636213	down
PREPL	0.00182867	0.864134	0.00872678	down
SULT4A1	0.000124545	0.593616	0.00137321	down
CABP1	0.00204429	0.64842	0.00942284	down
MBOAT7	0.00155079	0.878417	0.00779489	down
S100A1	4.2e-09	0.829231	1.44e-07	down
KIAA0513	0.000996246	0.762457	0.00583703	down
ZNF365	6.58e-07	0.760762	1.6e-05	down
C20orf203	0.00152548	0.838551	0.00770812	down
CCNA1	0.000736009	0.529412	0.00475945	down
DYNC1I1	9.07e-05	0.716147	0.00107906	down
RAI1	0.00119475	0.929307	0.00655988	down
SNORD113-4	0.00177671	NAN	0.00384808	down
SNORD116-26	0.00177671	NAN	0.00384808	down
SCAF1	3.43e-06	0.914898	7.05e-05	down
OLFM1	0.00218911	0.801849	0.00983853	down
FAM168B	0.00203965	0.950036	0.00940991	down
ST8SIA3	0.00178208	0.722616	0.00858829	down
OR5H15	0.00177671	NAN	0.00384808	down
WNT10B	0.000152139	0.473518	0.00158629	down
ZNF331	0.000974093	0.914783	0.00575651	down
HPCAL1	0.00126656	0.85675	0.00679983	down
HPCAL4	0.00109504	0.715158	0.00620248	down
GAGE2E	0.00177671	NAN	0.00384808	down
C16orf5	0.00138941	0.920038	0.00726556	down
ARFGAP2	0.00192531	0.973736	0.00904327	down
SNORD115-1	0.00177671	NAN	0.00384808	down
SNORD58A	0.00177671	NAN	0.00384808	down
SNORD58C	0.00177671	NAN	0.00384808	down
SGIP1	0.00118297	0.780464	0.00651809	down
COX7A1	0.00048888	0.721153	0.00361033	down
PRR20C	0.00177671	NAN	0.00384808	down
PRR20D	0.00177671	NAN	0.00384808	down
ADSS	0.000991341	0.903085	0.00582306	down
C7orf13	0.00153769	0.83257	0.00775837	down
ZNF575	0.000537342	0.842853	0.00384377	down
TMEM63B	0.0015194	0.935595	0.00769065	down
KCNC2	0.000597167	0.541482	0.0041168	down
NUDT14	4.67e-06	0.834113	9.19e-05	down
NUDT18	0.00166263	0.880179	0.00819742	down
KIAA0232	7.27e-05	0.92524	0.000906231	down
LGI4	1.49e-13	0.777992	7.5e-12	down
LGI3	0.00117774	0.744793	0.00650133	down
L3MBTL	0.00114243	0.864132	0.00636213	down
TNNT1	0.000171966	0.597435	0.00173061	down
HRASLS5	2.06e-05	0.713463	0.000329248	down
LOC284578	0.00205526	0.456862	0.00945565	down
KRT31	0.00177495	0.23315	0.00857848	down
SNORD96B	0.00177671	NAN	0.00384808	down
IL12RB2	0.000317185	0.370529	0.00267645	down
ATP6AP1	4.88e-06	0.945212	9.55e-05	down
SNORD63	0.00177671	NAN	0.00384808	down
FLJ35390	1.47e-05	0.68211	0.000247253	down
SNORD116-22	0.00177671	NAN	0.00384808	down
ACOT7	0.000425097	0.815891	0.00328215	down
ADCY5	0.000100066	0.777979	0.00116446	down
ADCY3	3.45e-06	0.905161	7.07e-05	down
ZFP28	0.00164818	0.914057	0.00814569	down
DCAF12L2	0.000132082	0.439295	0.00143246	down
LOC389493	0.00220571	0.243769	0.00989579	down
NCRNA00112	0.00177671	NAN	0.00384808	down
AMN1	0.000142424	0.879045	0.00151231	down
LOC100144604	0.00051464	0.527982	0.0037429	down
PPP2R5B	6.04e-05	0.895535	0.00078583	down
FRMPD2L1	0.00071783	0.244373	0.00467961	down
PPCS	0.00170849	0.925281	0.00834175	down
KCNA4	0.000682147	0.481546	0.00451922	down
SNORD81	0.00177671	NAN	0.00384808	down
KCNA1	0.000582786	0.617169	0.00404748	down
OPTN	0.00088869	0.873827	0.00539628	down
PLA2G2E	0.00177671	NAN	0.00384808	down
SLC26A11	0.00200031	0.948019	0.00930154	down
SLC16A8	0.00146234	0.584475	0.00750358	down
HS3ST4	5.55e-06	0.603704	0.00010714	down
SH2D5	0.00126807	0.560628	0.00680434	down
PCDHA3	0.00157325	0.868124	0.00787009	down
PCDHA7	1.54e-07	0.772188	4.24e-06	down
PCDHA8	0.00165401	0.672449	0.00816642	down
LRFN2	0.000217162	0.566241	0.00204324	down
NKX2-1	0.00217123	0.467628	0.00979098	down
IP6K1	0.00135113	0.942185	0.0071125	down
C18orf10	0.00203329	0.969355	0.00939534	down
EXD1	0.00154978	0.214844	0.00779449	down
HTR2C	0.000614069	0.462418	0.00420228	down
KLHL35	0.000133341	0.697328	0.00144322	down
EIF1B	0.00112725	0.96236	0.00630931	down
NRD1	0.000200061	0.966883	0.00193465	down
SCN3B	0.00118235	0.738758	0.00651809	down
NECAB1	7.33e-08	0.724963	2.15e-06	down
TFPT	0.000693444	0.910709	0.00456149	down
HIF1AN	0.000879493	0.95788	0.00536423	down
GPR143	0.00036858	0.658597	0.00297093	down
SLC7A4	7.15e-05	0.459899	0.000896657	down
DTNB	0.000192795	0.831245	0.00188032	down
GAGE12F	0.00177671	NAN	0.00384808	down
GDA	4.29e-05	0.571202	0.000597397	down
ODZ3	4.35e-05	0.622593	0.000602668	down
ODZ2	0.00120791	0.623508	0.0066041	down
AACSL	0.00064758	0.280372	0.00435896	down
SRCIN1	0.000594397	0.764707	0.00410184	down
PLCXD3	0.0018679	0.69294	0.00885839	down
PRAMEF3	0.00177671	NAN	0.00384808	down
PTPRN	0.000192699	0.7163	0.00188028	down
LOC84740	0.00035943	0.6192	0.00291779	down
CYP46A1	0.00219941	0.769411	0.00987266	down
DOC2A	0.000417966	0.60158	0.0032405	down
DOC2B	0.000508737	0.5356	0.00371289	down
ABLIM2	0.00190681	0.744628	0.00899132	down
LMTK3	0.00183289	0.831178	0.00874084	down
SNORD114-20	0.00177671	NAN	0.00384808	down
KIAA0368	0.00040194	0.912026	0.00316756	down
MAP1LC3A	1.17e-07	0.795027	3.29e-06	down
SNORD115-20	0.00177671	NAN	0.00384808	down
SNORD115-22	0.00177671	NAN	0.00384808	down
SNORD115-25	0.00177671	NAN	0.00384808	down
GDI1	2.17e-05	0.935073	0.000344081	down
KRT17	0.000169114	0.478035	0.00171422	down
KIAA1107	0.00046228	0.740454	0.00347514	down
GABRE	0.000409066	0.686594	0.00319807	down
NAPEPLD	0.000897862	0.926982	0.00541991	down
SLC26A8	0.00179119	0.397096	0.00861747	down
TRIM36	0.00130881	0.783339	0.00696471	down
SNORD114-29	0.00177671	NAN	0.00384808	down
FAIM2	4.67e-05	0.837135	0.000632317	down
PTPRS	1.81e-06	0.977372	3.96e-05	down
TTLL7	0.000894804	0.788653	0.005412	down
AGPAT3	0.000255374	0.956207	0.00230041	down
TEX28	0.00177671	NAN	0.00384808	down
SLC35F3	0.000100428	0.543577	0.00116617	down
TSPAN19	0.00148036	0.291518	0.00755908	down
SLC17A8	4.54e-05	0.753876	0.00061985	down
REXO1	0.00213646	0.905557	0.00970602	down
FAM100A	0.000513666	0.910954	0.00373824	down
ZNF280D	0.00203105	0.961194	0.00938943	down
GNG3	0.000220882	0.648957	0.00206781	down
STAM	0.000985822	0.919953	0.00579912	down
CLDN6	0.00192819	0.494899	0.00905231	down
RASGEF1B	0.000336645	0.858747	0.00279358	down
RASGEF1A	0.000163416	0.676776	0.00166663	down
RTN1	0.00191659	0.854367	0.00902467	down
RTN3	0.000101995	0.914795	0.0011777	down
CLUL1	0.000788108	0.52208	0.00498915	down
C16orf70	0.000162012	0.886349	0.00165642	down
ADAP1	2.98e-05	0.739897	0.000445671	down
TMEM150C	0.00181173	0.826468	0.00868834	down
C1orf151	0.000932994	0.937577	0.00557624	down
C2orf69	0.000352868	0.89877	0.00288234	down
NPTX1	0.000607059	0.655828	0.00416632	down
C13orf36	0.000229501	0.428811	0.00212333	down
NPTXR	0.00142898	0.789024	0.00738781	down
PYDC1	0.000775823	0.255682	0.00493574	down
LMAN1L	0.00219702	0.365963	0.00986977	down
DHCR24	0.000500942	0.856362	0.00367298	down
PPM1A	0.000244389	0.915063	0.00222717	down
NISCH	0.00189917	0.901471	0.00896946	down
RNF175	0.00147999	0.691983	0.00755908	down
KPNA6	3.72e-06	0.93904	7.56e-05	down
ZNF749	0.00211787	0.946886	0.00964933	down
FRS3	0.000167684	0.883044	0.00170159	down
PC	0.000265426	0.957172	0.0023559	down
FAM174B	1.06e-09	0.767202	3.82e-08	down
FAM174A	4.22e-05	0.874321	0.000589878	down
SPRN	0.000276431	0.786037	0.00241804	down
L1CAM	0.00181662	0.740374	0.00869757	down
PTPN3	0.00185145	0.540301	0.00880352	down
MARK2	9.05e-10	0.926943	3.28e-08	down
TERF2IP	0.000125554	0.928549	0.00138137	down
VSX1	0.000264107	0.596365	0.00234927	down
C1orf212	0.00150778	0.954401	0.00765072	down
DGKZ	0.000764769	0.799496	0.00489882	down
C10orf35	0.0014171	0.71126	0.0073523	down
HSPB3	0.00125201	0.43116	0.00674547	down
HPCA	0.000280848	0.638598	0.00244598	down
TICAM2	0.000197115	0.925207	0.00191246	down
A2BP1	0.000682795	0.592203	0.00452187	down
LIG4	0.000566708	0.884278	0.00398539	down
DEFB130	0.00177671	NAN	0.00384808	down
SNORD29	0.00177671	NAN	0.00384808	down
KCTD17	0.00063305	0.887303	0.00429211	down
THEM5	1.79e-05	0.323487	0.000291337	down
AJAP1	5.75e-05	0.692579	0.000753332	down
TMEM181	6.9e-05	0.937201	0.000872218	down
TMEM180	5.49e-05	0.8884	0.000725708	down
PGBD5	0.000226023	0.810032	0.00209909	down
RNGTT	6.05e-05	0.956867	0.00078583	down
G6PD	0.000891556	0.955007	0.00540409	down
CIC	0.000372247	0.940156	0.00299528	down
RAB39B	0.000493242	0.933547	0.0036327	down
LOC389332	0.000328146	0.515479	0.00274973	down
LOC283392	0.00215795	0.463474	0.0097583	down
C1orf96	0.000677586	0.879939	0.00450352	down
C1orf175	0.000629669	0.751726	0.0042735	down
C1orf173	0.00109749	0.612695	0.00620837	down
LRP11	4.85e-07	0.835031	1.22e-05	down
ZNF329	0.00189918	0.929399	0.00896946	down
HEPH	6.66e-06	0.930213	0.000124682	down
BBS7	0.000970277	0.873269	0.00574223	down
KIAA1984	0.00199078	0.842934	0.00926878	down
TMEM57	4.64e-09	0.976302	1.58e-07	down
SCG5	0.000262149	0.839993	0.00233793	down
SNORD16	0.00177671	NAN	0.00384808	down
PRRG3	0.0010109	0.301646	0.00589597	down
ERI3	0.000477775	0.961877	0.00356163	down
EDC4	0.000866928	0.976025	0.0053128	down
SNORD36A	0.00177671	NAN	0.00384808	down
RPS6KA2	0.000381979	0.896915	0.00305793	down
HBQ1	0.000107667	0.447039	0.0012246	down
SENP5	0.000786093	0.933316	0.00498387	down
NPHP4	0.0010003	0.944511	0.00585243	down
SNORD91B	0.00177671	NAN	0.00384808	down
PPP2R2C	5.91e-06	0.711449	0.000113114	down
KLRAQ1	4.42e-05	0.923137	0.000609175	down
SNORD87	0.00177671	NAN	0.00384808	down
ACTR10	0.00140354	0.936375	0.00730411	down
EEF1A2	0.000602756	0.765388	0.00414976	down
SNORD86	0.00177671	NAN	0.00384808	down
TSPYL5	5.72e-05	0.733942	0.00074997	down
PEX14	0.000408943	0.942365	0.00319807	down
ETNK1	0.0018489	0.958081	0.00879543	down
CD47	2.82e-05	0.919963	0.000426302	down
CA11	0.000558043	0.760378	0.00393842	down
CALY	8.33e-05	0.545236	0.00100901	down
EIF4E3	0.000246225	0.854352	0.00223376	down
GLRA2	0.000341564	0.488553	0.00281958	down
ACTR1B	0.00169261	0.932658	0.0082879	down
ACTR1A	6.15e-05	0.94241	0.000795331	down
TRHDE	0.00111208	0.456191	0.00624991	down
SYT15	0.00143447	0.848876	0.00740314	down
RGS11	0.000625507	0.90867	0.00425441	down
C5orf44	0.00122902	0.970846	0.00667577	down
C5orf40	0.00117039	0.537982	0.00647223	down
SH3BP5	3.66e-05	0.820797	0.000528692	down
PAK6	0.00177661	0.645945	0.00857851	down
KCNG2	0.00218413	0.683789	0.0098269	down
DEFB116	0.00177671	NAN	0.00384808	down
DEFB113	0.00177671	NAN	0.00384808	down
LCN15	0.000300988	0.187816	0.00256828	down
RBMY1E	0.00177671	NAN	0.00384808	down
SNORD91A	0.00177671	NAN	0.00384808	down
COX19	1.44e-05	0.921717	0.00024433	down
COX11	0.00135819	0.978401	0.00713809	down
ANKRD13C	0.000991593	0.94073	0.00582306	down
PPA1	0.000331254	0.963139	0.00276601	down
MCTP1	0.00173521	0.651746	0.00844565	down
MCTP2	0.00197002	0.592016	0.00919894	down
MGC45800	0.00178196	0.52843	0.00858829	down
C22orf30	0.000357117	0.954286	0.00290822	down
SH3PXD2A	1.59e-07	0.842615	4.36e-06	down
SELENBP1	8.54e-05	0.824424	0.00102621	down
WDR47	0.0015559	0.843979	0.00780804	down
RUFY3	0.000106791	0.946569	0.00121665	down
RUFY2	0.000114512	0.909363	0.00128537	down
CYP11A1	7.93e-08	0.647213	2.3e-06	down
MUM1L1	5.58e-05	0.589465	0.000735896	down
CKB	0.000647479	0.950796	0.00435896	down
TM2D3	0.000170195	0.921912	0.00172208	down
TRIM23	5.14e-05	0.896223	0.000686396	down
RHOT1	0.000696719	0.95364	0.0045757	down
DNAJC27	0.000519739	0.851224	0.00376443	down
GNAO1	0.000101784	0.879223	0.00117726	down
NTSR2	1.03e-25	0.834851	1.13e-23	down
DNAJC21	0.00041111	0.936324	0.00320672	down
NTSR1	3.44e-05	0.46015	0.000501026	down
TMEM74	6.29e-06	0.74753	0.00011932	down
SLC39A12	0.000506797	0.71566	0.00370005	down
MRPL2	0.00105628	0.973202	0.00606414	down
RALGAPA1	0.000426557	0.935902	0.00328807	down
SLC3A1	0.00177982	0.704172	0.00858605	down
CBLN2	0.000704665	0.624906	0.00461714	down
CBLN3	9.56e-06	0.72475	0.000171061	down
SNORD50B	0.00177671	NAN	0.00384808	down
LOC92973	0.00211142	0.836955	0.0096349	down
FSCN2	0.000107073	0.547869	0.00121919	down
SNORD65	0.00177671	NAN	0.00384808	down
RPS6KC1	0.000417886	0.950994	0.0032405	down
KRTAP22-1	0.00177671	NAN	0.00384808	down
CAMK1G	0.00110055	0.53921	0.00621656	down
SMCR7	0.000258451	0.920419	0.00231475	down
HIST4H4	1.93e-06	0.528971	4.19e-05	down
LOC100133669	0.000413537	0.534303	0.00321864	down
TTBK1	0.000896855	0.871013	0.00541701	down
LOC151009	0.000952351	0.431817	0.00565407	down
KIAA1377	0.00147829	0.831446	0.00755708	down
SNORD61	0.00177671	NAN	0.00384808	down
SNORD115-35	0.00177671	NAN	0.00384808	down
RDH14	0.000462783	0.946481	0.0034755	down
DEDD2	5.24e-06	0.852588	0.000101868	down
UBR3	0.000487337	0.899234	0.00360412	down
SNORD114-10	0.00177671	NAN	0.00384808	down
NALCN	7.52e-08	0.852547	2.2e-06	down
KIAA0427	5.58e-06	0.900872	0.000107499	down
TRIM72	0.000938267	0.207849	0.00560151	down
C9orf24	0.000502814	0.588152	0.00367917	down
C9orf25	1.08e-05	0.917126	0.000190205	down
SERHL2	0.000101409	0.786545	0.00117468	down
GRB2	0.00155499	0.963816	0.00780804	down
TGOLN2	7.36e-06	0.941663	0.000136177	down
SLC25A32	0.00131256	0.949664	0.00697796	down
MFSD4	0.00195442	0.695803	0.00915036	down
AKR7A3	0.00120484	0.785116	0.00659891	down
FAM47E	0.00170348	0.905083	0.00832279	down
MAPK15	0.00139128	0.338173	0.00726896	down
SNORD114-6	0.00177671	NAN	0.00384808	down
SNORD114-5	0.00177671	NAN	0.00384808	down
TACC1	0.0015233	0.941191	0.00770088	down
PICK1	2.57e-05	0.806356	0.000395903	down
TMEM233	0.000128856	0.415558	0.00140639	down
CAB39	0.00181593	0.950342	0.00869737	down
CKMT1A	0.000549341	0.610766	0.00390625	down
CKMT1B	0.00168375	0.696065	0.00826378	down
NCDN	0.000617006	0.779057	0.0042165	down
PCDH9	0.000708607	0.847957	0.00463007	down
TTC12	0.000657957	0.758761	0.00441008	down
HSF4	0.000687055	0.870595	0.0045321	down
MIB2	0.00145826	0.939332	0.00748825	down
LOC113230	0.000455093	0.905378	0.00343874	down
B3GALT2	5.92e-10	0.798486	2.2e-08	down
OCA2	0.000383037	0.284091	0.00305869	down
HCN1	0.00107893	0.50265	0.00615118	down
HCN2	0.000203735	0.838113	0.00196002	down
MED10	0.00196975	0.956914	0.00919894	down
LRIT2	0.000391308	0.925709	0.00310536	down
GOLGA7B	0.00161074	0.800654	0.0080166	down
CHIC1	0.00122876	0.856814	0.00667577	down
CEP170L	0.000786067	0.714577	0.00498387	down
ECHDC2	0.00194838	0.904397	0.00912414	down
NCOA7	8.61e-06	0.791478	0.000156185	down
NELL1	0.000373928	0.516851	0.00300577	down
SPCS3	9.77e-09	0.962873	3.25e-07	down
LOC442454	3.77e-08	0.867473	1.16e-06	down
P4HTM	0.00149188	0.9104	0.00760196	down
EMID1	0.00183164	0.933496	0.00873688	down
AK7	6.79e-05	0.468914	0.000860763	down
AK5	3.32e-10	0.652155	1.28e-08	down
TMEM55B	2.85e-06	0.929055	6e-05	down
SNCB	0.000481842	0.680658	0.00358155	down
RNF126	0.000701468	0.93677	0.004601	down
PDE1B	0.00207048	0.709344	0.00950301	down
PDE1A	4.04e-06	0.646065	8.07e-05	down
FEZF1	4.67e-05	0.374694	0.000632317	down
UBLCP1	0.00144745	0.968552	0.00744764	down
SNORD12C	0.00177671	NAN	0.00384808	down
FEZF2	1.18e-05	0.577275	0.000204122	down
MTMR7	5.31e-06	0.783911	0.00010265	down
MTMR6	3.51e-06	0.922096	7.18e-05	down
MTMR4	0.00202809	0.949291	0.00938581	down
NR3C2	0.00200807	0.895006	0.00932496	down
SNORD123	0.00177671	NAN	0.00384808	down
SNORD126	0.00177671	NAN	0.00384808	down
SNORD125	0.00177671	NAN	0.00384808	down
ADAMTSL5	0.00147167	0.638176	0.00753265	down
FARP2	0.000394346	0.914322	0.00311981	down
C9orf40	0.000126977	0.915923	0.00138902	down
PRMT8	0.00122801	0.554939	0.00667577	down
EEF1E1	0.00102364	0.973369	0.00593267	down
SCYL1	0.000390329	0.95939	0.00309879	down
NOC2L	0.000266889	0.963243	0.00236684	down
HAS1	0.000258534	0.436056	0.00231475	down
KIAA1109	0.000226652	0.913339	0.00210076	down
IRS4	0.000117251	0.318727	0.00130967	down
NEURL	0.00105509	0.641617	0.00606358	down
SOSTDC1	0.00187673	0.482432	0.00889204	down
FLJ32063	0.00140596	0.497018	0.00731114	down
RGL1	0.000755129	0.936738	0.004855	down
MTX2	0.000264791	0.910889	0.00235331	down
PRKCG	9.1e-05	0.517662	0.00108128	down
MATK	0.00133366	0.65621	0.00704766	down
MYADM	2.74e-06	0.862311	5.79e-05	down
CYP4F11	5.47e-05	0.810017	0.00072454	down
CCDC92	0.000334802	0.875232	0.0027873	down
RTN4IP1	0.00210666	0.93809	0.00961961	down
FGFR3	0.000205838	0.84839	0.00197286	down
VPS4A	3.15e-05	0.972044	0.000466983	down
NINL	0.00168703	0.919561	0.00827394	down
SYP	0.000898766	0.772292	0.00542377	down
KRTAP23-1	0.00177671	NAN	0.00384808	down
CSRP2BP	0.00177503	0.958386	0.00857848	down
SNORD48	0.00177671	NAN	0.00384808	down
MIP	0.000203201	0.660252	0.00195764	down
RGN	6.22e-06	0.846451	0.000118043	down
USP20	0.000384044	0.953191	0.00306429	down
UBA1	0.000867438	0.9735	0.0053128	down
UBE2M	0.000255799	0.900505	0.0023018	down
UBE2Z	0.000189942	0.95171	0.00186312	down
TAC1	0.000198068	0.555667	0.00191808	down
RPRML	0.000158712	0.469087	0.00162968	down
ADAMTS8	2.36e-06	0.731017	5.06e-05	down
PENK	8.36e-07	0.654268	1.98e-05	down
MORF4L1	4.41e-27	0.969103	5.21e-25	down
COCH	0.000117372	0.648774	0.0013103	down
C21orf71	0.00125471	0.903507	0.00675387	down
GPR61	0.000612408	0.546513	0.00419371	down
GPR68	0.00185416	0.551164	0.00880845	down
FAM171A1	0.00138173	0.908234	0.00724014	down
SNORD114-9	0.00177671	NAN	0.00384808	down
ANKRD11	0.000211906	0.940205	0.00200573	down
SNORD46	0.00177671	NAN	0.00384808	down
SPHKAP	0.00191529	0.781011	0.00902064	down
DMC1	0.000152892	0.499825	0.00159092	down
SNORD115-2	0.00177671	NAN	0.00384808	down
SNORD115-3	0.00177671	NAN	0.00384808	down
C10orf105	0.000448297	0.797559	0.00340734	down
SNORD27	0.00177671	NAN	0.00384808	down
LDB1	0.00150198	0.959807	0.00763445	down
EPX	0.000767423	0.691744	0.00490682	down
KCNK1	4.73e-05	0.670208	0.000639344	down
NHLRC1	1.23e-06	0.69958	2.8e-05	down
PAFAH1B1	0.000372331	0.920949	0.00299528	down
CXorf56	0.00202411	0.957585	0.00938037	down
VAMP1	7.87e-07	0.838389	1.88e-05	down
BRSK2	0.000102734	0.821492	0.00118224	down
BRSK1	2.5e-07	0.817553	6.57e-06	down
F8A1	0.000553758	0.918025	0.00392348	down
MMS19	1.9e-05	0.959825	0.000307246	down
DKFZP586I1420	5.07e-17	0.96141	3.29e-15	down
C13orf1	0.000256811	0.872016	0.00230837	down
SNORD105	0.00177671	NAN	0.00384808	down
ANKRD34A	0.000437813	0.664705	0.00334635	down
FADS6	0.000362199	0.311014	0.00293563	down
SYNGR1	0.00124536	0.805191	0.0067282	down
SYNGR3	0.000257933	0.646231	0.0023134	down
HCG11	0.0018977	0.768561	0.00896727	down
PET112L	0.00198905	0.946562	0.00926391	down
AMZ2P1	0.00110113	0.9538	0.00621656	down
SP9	0.000269043	0.393866	0.0023808	down
USP14	0.00123596	0.922183	0.00669468	down
SSBP3	0.00185161	0.856968	0.00880352	down
RLTPR	0.000335889	0.61403	0.00279295	down
ZCCHC12	0.00060301	0.587764	0.00415012	down
VAMP2	0.000185891	0.862155	0.00183301	down
JPH1	0.000644066	0.62965	0.00434242	down
FAM190B	0.000895052	0.960345	0.005412	down
FXR2	0.000339882	0.936154	0.00281324	down
NEGR1	0.00166113	0.750702	0.00819587	down
NEUROD6	0.000342664	0.367301	0.00282222	down
CYP4X1	0.00101804	0.554148	0.00591576	down
SNAP91	0.0013145	0.754901	0.00698232	down
KLC1	0.000964003	0.85761	0.00571004	down
FBXW11	0.000885592	0.961651	0.00538618	down
SNORD35A	0.00177671	NAN	0.00384808	down
SNORD35B	0.00177671	NAN	0.00384808	down
TSPYL6	0.00202777	0.45024	0.00938581	down
SAMD12	0.000155656	0.675773	0.00160826	down
RBMY3AP	0.00177671	NAN	0.00384808	down
MYH15	0.00151615	0.864643	0.00767797	down
MAP4K2	0.000206165	0.90273	0.00197413	down
DNM1P35	0.000963664	0.636103	0.00570967	down
PPEF1	0.000392698	0.494796	0.00311398	down
PRPH2	0.000188983	0.479633	0.00185815	down
LOC100169752	0.00177671	NAN	0.00384808	down
FITM2	0.00138586	0.90312	0.00725617	down
GREB1L	9.43e-06	0.77999	0.000169684	down
AP1S3	0.000307723	0.804752	0.00261272	down
SNORD24	0.00177671	NAN	0.00384808	down
VSTM2B	6.34e-07	0.685021	1.55e-05	down
WWP1	0.000246678	0.941004	0.00223586	down
SNORA8	0.000101817	0.975886	0.00117726	down
PGP	0.000811145	0.868962	0.00509536	down
GPR44	0.000739214	0.764256	0.00477535	down
CA7	0.0012812	0.430552	0.00684621	down
FUT9	0.00222359	0.867015	0.00995208	down
SNORD28	0.00177671	NAN	0.00384808	down
NCRNA00092	0.000357736	0.788346	0.00291095	down
NRG1	0.00203797	0.661557	0.00940849	down
KIFC3	0.00207912	0.945442	0.00953168	down
CYLD	0.00102539	0.913539	0.00593664	down
EID3	8.02e-11	0.673594	3.36e-09	down
EID1	0.000116751	0.980162	0.00130599	down
HCRTR1	0.00108906	0.425601	0.00619174	down
HCRTR2	0.000275928	0.243028	0.00241467	down
VAX1	0.00182469	0.494569	0.00871388	down
NRGN	0.00040551	0.67817	0.00318601	down
MT1M	0.00038424	0.877775	0.00306466	down
MT1G	0.000866855	0.756385	0.0053128	down
WBP2NL	0.000570486	0.619955	0.00400003	down
LYNX1	0.000336472	0.825831	0.00279328	down
LOC143666	0.00118282	0.867249	0.00651809	down
UBL4A	0.00200769	0.936517	0.00932496	down
GABRG2	0.00107459	0.628497	0.00613156	down
AGAP3	0.00062256	0.896094	0.00424341	down
RANBP6	0.000483722	0.954297	0.00359291	down
TMEM132D	0.000595544	0.509894	0.00410837	down
GBAP1	0.0012178	0.961091	0.00664046	down
C6orf105	8.32e-05	0.394505	0.00100901	down
AQP11	0.00070013	0.907406	0.0045937	down
CHRM3	0.00169643	0.516038	0.0083038	down
CHRM2	0.00127643	0.334243	0.00683136	down
CHRM1	0.000525261	0.617984	0.0037921	down
MGAT3	9.6e-07	0.824574	2.26e-05	down
CBFA2T2	0.000209082	0.918834	0.00199093	down
C9orf86	5.29e-06	0.95303	0.000102416	down
LRRC7	1.42e-05	0.573259	0.000240834	down
TNIP3	0.000231582	0.230347	0.00213873	down
RPL39L	7.25e-05	0.766016	0.000904924	down
PPFIBP1	0.00211341	0.879093	0.00963757	down
FTHL3	0.000553836	0.778498	0.00392348	down
DOCK9	0.000110614	0.834668	0.00124981	down
DOCK3	0.000393662	0.801679	0.00311561	down
PLEKHB2	0.00120506	0.930028	0.00659891	down
LOC93622	0.00106966	0.940608	0.00610684	down
SCUBE1	0.000643035	0.509129	0.00433689	down
FBXO2	8.91e-08	0.784894	2.56e-06	down
NAV3	1.37e-05	0.782795	0.000233928	down
LOC401010	0.00196816	0.904022	0.00919665	down
TRUB2	0.000974844	0.9664	0.00575929	down
ATL1	0.000104947	0.808233	0.00120165	down
RUSC2	1.3e-09	0.854293	4.64e-08	down
LOC729991	0.00181966	0.890606	0.00870156	down
MOXD1	0.000120047	0.692062	0.00133437	down
LOC338651	0.000382383	0.490328	0.00305793	down
LHX6	0.000686018	0.570149	0.00453006	down
AMY2A	0.00042331	0.456441	0.00327081	down
MON1A	0.00127381	0.952614	0.0068191	down
HECTD1	0.00120735	0.951521	0.0066039	down
TSPAN5	9.47e-06	0.878171	0.00017017	down
PPP1R12B	5.63e-06	0.901073	0.000108396	down
CCK	0.000452553	0.567879	0.00342712	down
KCTD13	0.000510011	0.904711	0.00371691	down
IGHMBP2	0.00133811	0.926958	0.0070566	down
PNCK	0.00202166	0.691613	0.00937323	down
GSK3A	0.000210481	0.908453	0.00199966	down
UBB	0.00181412	0.964073	0.00869169	down
ANKRD56	0.00177363	0.391358	0.00857572	down
EPT1	0.000203055	0.894985	0.00195714	down
NR4A2	0.000457878	0.73766	0.00345343	down
PCBP3	2.96e-05	0.879957	0.000443622	down
C1QL2	0.000572695	0.637245	0.00401141	down
C1QL3	0.000273936	0.409327	0.00240543	down
RASL11B	0.00180206	0.789418	0.0086521	down
C10orf140	0.000242965	0.735424	0.00221988	down
HECW2	2.59e-05	0.823113	0.000396905	down
EPHA8	1.49e-05	0.379204	0.000250767	down
EPHA7	0.00106227	0.643697	0.00608495	down
HSP90AB2P	0.00204226	0.729429	0.00941768	down
TRMT6	5.63e-05	0.976294	0.000740161	down
FGF13	0.00130106	0.744184	0.00693065	down
FLJ39739	2.22e-05	0.880957	0.000349865	down
SEMA3A	0.00182106	0.83165	0.00870258	down
SEMA3E	9.96e-05	0.654746	0.00116227	down
TNFRSF18	0.000579148	0.567098	0.00403732	down
ZC3H12B	0.00110424	0.797033	0.00622492	down
TH	0.0014491	0.329929	0.00745242	down
MLXIPL	0.00190658	0.805751	0.00899132	down
SNORD49A	0.00177671	NAN	0.00384808	down
C1QTNF4	0.00131757	0.633074	0.00699009	down
CREB3L3	0.000502515	0.304388	0.00367917	down
CARTPT	5.43e-09	0.267111	1.84e-07	down
PPAPDC3	5.84e-07	0.887133	1.44e-05	down
OTX1	0.00135295	0.794564	0.0071184	down
SLC6A1	5.14e-05	0.888567	0.000686396	down
IGSF10	0.00110429	0.643139	0.00622492	down
VDAC2	0.00203918	0.968658	0.00940986	down
C6orf127	0.00189785	0.0950695	0.00896727	down
PLEKHM3	0.000311197	0.860836	0.00263459	down
NDUFB8	0.00010091	0.912749	0.00117045	down
CDC42SE2	1.56e-05	0.943103	0.000261461	down
PVRL3	0.000336876	0.938284	0.00279437	down
NDUFB6	0.000719414	0.982518	0.00468578	down
RPS6KL1	7.51e-06	0.849052	0.000138761	down
DIRAS2	0.00076889	0.761362	0.00490682	down
SFXN3	1.77e-10	0.90422	7.1e-09	down
LMO7	0.00217419	0.748066	0.00979935	down
SNORD102	0.00177671	NAN	0.00384808	down
FAM50B	9.98e-06	0.738414	0.000177451	down
CIDEA	7.4e-10	0.301132	2.72e-08	down
NPHS1	1.88e-06	0.237241	4.09e-05	down
SLC4A8	4.76e-05	0.885035	0.000643262	down
SLC35F4	0.0018779	0.458352	0.00889554	down
ERC2	0.000891284	0.695985	0.00540403	down
ARPM1	0.000213364	0.624424	0.00201767	down
SSTR3	0.000648655	0.320693	0.00436476	down
C10orf88	8.28e-21	0.891293	6.94e-19	down
IGSF8	0.00209527	0.872165	0.0095886	down
SNORD115-14	0.00177671	NAN	0.00384808	down
AQP5	7.62e-07	0.669987	1.83e-05	down
HMOX2	1.18e-05	0.92274	0.000204342	down
NOS1	0.000272186	0.557413	0.00239556	down
USP35	0.00109749	0.881541	0.00620837	down
ATP1B1	7.78e-42	0.802625	1.86e-39	down
TESK1	0.00178146	0.960227	0.00858829	down
NCRNA00113	0.00177671	NAN	0.00384808	down
NOS1AP	0.00110066	0.737214	0.00621656	down
PLD3	0.0002605	0.858508	0.00232626	down
ZNF132	0.00193691	0.96667	0.00908081	down
FAM164C	0.000494925	0.863626	0.00363719	down
C14orf169	6.13e-05	0.811402	0.000793177	down
C14orf162	0.000894158	0.485336	0.00541187	down
CASD1	0.00215997	0.937491	0.00976528	down
SNORD115-16	0.00177671	NAN	0.00384808	down
KIAA0284	0.00111675	0.770226	0.00626759	down
MAOB	7.07e-08	0.902461	2.08e-06	down
CHAD	2.93e-05	0.478403	0.00043969	down
FABP6	3.63e-06	0.490525	7.4e-05	down
FABP5	0.000483042	0.746863	0.00358916	down
FABP3	0.000532069	0.707242	0.00381858	down
GABRA4	0.00166695	0.550703	0.00821078	down
MESP2	0.00133697	0.48866	0.00705441	down
GABRA1	0.000445305	0.553307	0.00338973	down
ATP6V0B	0.000279217	0.943108	0.00243411	down
ATP6V0C	0.000999466	0.91013	0.00585067	down
SEPW1	0.0019296	0.937443	0.00905683	down
SCN9A	0.00215248	0.613985	0.00975078	down
SNORD30	0.00177671	NAN	0.00384808	down
TRIM3	1.79e-05	0.852317	0.000291337	down
SNORD31	0.00177671	NAN	0.00384808	down
PRUNE	9.98e-06	0.98574	0.000177451	down
GABARAPL1	0.00139179	0.841666	0.00726896	down
PRR7	0.00175299	0.865104	0.00851137	down
DVL1	2.72e-05	0.928807	0.00041487	down
ABCB9	0.00143942	0.833419	0.00741751	down
PLEKHA1	5.04e-05	0.804661	0.00067559	down
SNORD115-10	0.00177671	NAN	0.00384808	down
BAI2	0.00110242	0.870505	0.00621951	down
TLX2	0.00179912	0.446268	0.00864562	down
SLC30A3	0.00101376	0.485063	0.00590255	down
ASPDH	1.04e-06	0.632899	2.43e-05	down
LOC344967	0.000210485	0.602926	0.00199966	down
RSPO3	0.00146116	0.517881	0.00749938	down
RSPO2	0.000953388	0.604298	0.00565859	down
SUGT1L1	0.000728746	0.810329	0.00473454	down
SNORD18B	0.00177671	NAN	0.00384808	down
KCNV1	0.000395083	0.376208	0.00312445	down
SPANXN5	0.00177671	NAN	0.00384808	down
TSG1	0.000442058	0.314034	0.00337127	down
CCKBR	0.000243442	0.458702	0.00222219	down
TUBB4	0.000379698	0.82363	0.00304263	down
HERC1	0.00104239	0.892259	0.00601303	down
HERC3	0.000864614	0.88244	0.005305	down
HERC2	8.24e-05	0.928932	0.00100098	down
C19orf76	0.00128994	0.858686	0.00688927	down
ZFYVE28	0.00211966	0.829649	0.00965322	down
PEX5L	0.000164904	0.676377	0.00167847	down
EIF3C	0.00122887	0.815449	0.00667577	down
ADRA2A	0.00101497	0.760417	0.00590506	down
BCAS2	0.00101505	0.94779	0.00590506	down
LOC151174	0.00133468	0.671472	0.00704945	down
TUSC1	4.91e-05	0.86341	0.000661495	down
SLC8A2	0.000125962	0.634635	0.00138363	down
EFNA5	0.00099446	0.716851	0.00582989	down
OSBP2	0.00034064	0.891345	0.00281535	down
WFS1	7.27e-05	0.927373	0.000906231	down
?|728045	0.00177671	NAN	0.00384808	down
SERPINI1	6.39e-08	0.714	1.9e-06	down
DYNC1H1	0.000109279	0.934014	0.00123882	down
EPHA10	0.000623472	0.658636	0.00424821	down
TOM1L2	2.42e-08	0.914087	7.6e-07	down
MAPT	9.09e-05	0.926729	0.00108089	down
AFG3L2	0.000382069	0.935106	0.00305793	down
FAM19A5	2.66e-15	0.920385	1.51e-13	down
CACNG3	0.000215633	0.495546	0.00203164	down
CACNA2D3	0.000796978	0.628129	0.00503135	down
ATP2B3	0.000579405	0.576636	0.00403743	down
MACF1	0.00150539	0.967927	0.00764425	down
FAM83H	0.00117803	0.775121	0.00650133	down
ARMCX5	0.00139318	0.924761	0.00727051	down
RAB3A	0.00100363	0.710661	0.00586525	down
NCAM2	0.00216216	0.901038	0.00977303	down
FAHD2B	0.00112148	0.798497	0.00628557	down
CCDC108	6.84e-06	0.735169	0.000127686	down
BICD2	0.00215173	0.968495	0.0097495	down
CHRNA4	0.000241526	0.774162	0.0022087	down
MAPK8IP2	0.000831034	0.816556	0.00515442	down
MAPK8IP3	4.02e-06	0.855304	8.05e-05	down
CPAMD8	0.000673044	0.700054	0.00448186	down
SNORD26	0.00177671	NAN	0.00384808	down
UBOX5	2.82e-05	0.953985	0.000426092	down
ANKRD9	0.000143122	0.810051	0.00151458	down
PEF1	0.000154673	0.971906	0.00159971	down
SPATA2	5.04e-07	0.915979	1.26e-05	down
SNORD114-7	0.00177671	NAN	0.00384808	down
SIRPA	0.00184159	0.908651	0.00877212	down
TRAPPC9	2.64e-05	0.958055	0.000403739	down
PRRT1	0.000554881	0.756335	0.00392787	down
KIAA1279	0.000283836	0.952889	0.002466	down
ATPIF1	0.00194038	0.930435	0.00909497	down
TACR3	0.000229913	0.278656	0.00212618	down
KCNH3	0.000656752	0.658596	0.00440732	down
SNORD45C	0.00177671	NAN	0.00384808	down
SNORD111B	0.00177671	NAN	0.00384808	down
PNMA5	0.000468221	0.461467	0.0035044	down
PRNP	6.29e-09	0.891008	2.13e-07	down
ZER1	0.000208202	0.892748	0.00198624	down
SNORD18A	0.00177671	NAN	0.00384808	down
FAM71E1	0.000769494	0.726111	0.00490765	down
CABYR	6.39e-05	0.690236	0.000822943	down
TMEM52	2.28e-05	0.399293	0.000357847	down
TNFSF9	6.5e-06	0.641723	0.000122211	down
CLPTM1	0.000154404	0.955521	0.00159774	down
C17orf39	0.000206106	0.962862	0.00197413	down
CT47A7	0.00177671	NAN	0.00384808	down
CT47A6	0.00177671	NAN	0.00384808	down
CT47A1	0.00177671	NAN	0.00384808	down
SNORD109B	0.00177671	NAN	0.00384808	down
SYTL1	0.00031083	0.540669	0.00263365	down
SYTL2	0.000353546	0.821561	0.00288486	down
RELN	0.00217138	0.648592	0.00979098	down
SNORD45B	0.00177671	NAN	0.00384808	down
KLK7	0.000768982	0.312141	0.00490682	down
SNORD45A	0.00177671	NAN	0.00384808	down
FOXP1	0.000439363	0.90165	0.00335695	down
PLCH2	1.85e-17	0.712663	1.22e-15	down
NLK	0.00117915	0.862045	0.00650578	down
SST	3.36e-09	0.517809	1.16e-07	down
FLJ42875	0.000943006	0.667688	0.00561645	down
SGSM3	0.00087129	0.926852	0.0053315	down
LRRC3B	0.00150827	0.838907	0.0076513	down
MTMR12	0.000818271	0.883578	0.0051216	down
KIAA1045	0.000568196	0.631694	0.00399079	down
C14orf129	2.01e-09	0.88631	7.06e-08	down
MFN2	0.000287489	0.938802	0.00248826	down
NUDT9	0.000296171	0.975789	0.00254197	down
IQSEC1	0.000836827	0.83903	0.00518565	down
C20orf194	0.00097205	0.931136	0.00574775	down
LOC100132111	0.000243651	0.350143	0.00222219	down
DYNLL2	0.00182388	0.919859	0.00871203	down
SNORD114-22	0.00177671	NAN	0.00384808	down
SNORD114-23	0.00177671	NAN	0.00384808	down
SNORD114-26	0.00177671	NAN	0.00384808	down
SNORD114-27	0.00177671	NAN	0.00384808	down
SNORD114-24	0.00177671	NAN	0.00384808	down
SNORD114-25	0.00177671	NAN	0.00384808	down
SNORD114-28	0.00177671	NAN	0.00384808	down
CACNA1I	0.000989962	0.606311	0.00581847	down
CACNA1B	0.000434785	0.577757	0.00333189	down
CACNA1E	0.000525316	0.705292	0.0037921	down
ATP6V0D1	0.000174741	0.916379	0.00175066	down
BMP8A	3.05e-25	0.8792	3.29e-23	down
SNORD115-41	0.00177671	NAN	0.00384808	down
SNORD115-40	0.00177671	NAN	0.00384808	down
OAT	1.61e-08	0.917098	5.22e-07	down
SLC22A17	0.000300484	0.925274	0.00256611	down
PDIK1L	0.000367024	0.97085	0.0029664	down
S100A13	3.82e-06	0.943237	7.73e-05	down
PPM1H	3.55e-06	0.772233	7.26e-05	down
RTN4RL1	0.000757951	0.562279	0.00486882	down
PAX7	0.00218071	0.361224	0.00981808	down
PCDHA10	0.000685326	0.783231	0.00452787	down
PCDHA12	0.000197312	0.653922	0.00191286	down
PCDHA13	0.000893312	0.677576	0.00540994	down
PTPN5	0.000534542	0.613979	0.00383176	down
GRK6	0.000971761	0.942154	0.00574769	down
PLD5	3.85e-06	0.79932	7.77e-05	down
SNORD1A	0.00177671	NAN	0.00384808	down
SNORD1B	0.00177671	NAN	0.00384808	down
ARRB1	0.00143533	0.828267	0.00740552	down
CHCHD10	4.45e-05	0.855155	0.000611352	down
SNAP25	0.000640812	0.724713	0.00433044	down
DSG1	4.43e-05	0.410368	0.000609175	down
FBXO45	0.000309037	0.937171	0.00261999	down
FBXO40	0.0016849	0.348447	0.00826742	down
RMND5A	0.000780775	0.939317	0.00496088	down
NRBF2	0.000649138	0.958539	0.00436658	down
KCNJ3	0.0016056	0.573516	0.00800071	down
KCNJ4	0.000687491	0.606621	0.0045321	down
KCNJ9	1.15e-05	0.745971	0.000200892	down
SNORD19	0.00177671	NAN	0.00384808	down
KIAA1217	0.000227612	0.754721	0.00210775	down
CDC37L1	0.00154082	0.92998	0.00776651	down
FLJ23867	0.000178377	0.832829	0.00177513	down
C19orf30	0.000121081	0.443365	0.0013444	down
EPCAM	0.000170684	0.543836	0.00172366	down
MPPED1	7.7e-05	0.508516	0.000951758	down
WBP2	0.000144856	0.953975	0.00152821	down
COL6A6	6.26e-05	0.442362	0.000808576	down
GPR22	0.000133622	0.445605	0.00144458	down
C3orf33	3.56e-06	0.921578	7.26e-05	down
GPR27	0.000767755	0.713085	0.00490682	down
PPP1R16B	4.8e-05	0.751362	0.000647431	down
KIAA1841	0.000672981	0.903951	0.00448186	down
SOCS5	0.000158761	0.934721	0.00162968	down
CALN1	0.000237059	0.752011	0.00217569	down
PACSIN1	0.000468484	0.613774	0.00350509	down
CCNY	0.000493283	0.946443	0.0036327	down
SNORD115-37	0.00177671	NAN	0.00384808	down
PTS	0.00133219	0.92409	0.00704346	down
DCUN1D4	0.000170918	0.948061	0.0017243	down
AMPH	0.00109264	0.738496	0.00619346	down
SNCG	0.00192193	0.678112	0.00903531	down
AIFM3	2.32e-05	0.674547	0.00036254	down
CES7	0.00026657	0.415264	0.00236503	down
OPN4	0.00180173	0.285004	0.0086521	down
REPS2	2.49e-06	0.778754	5.3e-05	down
CORT	4.19e-05	0.618312	0.000587006	down
PDZRN4	0.000861025	0.889008	0.00529088	down
OGDHL	0.00088178	0.673967	0.00537499	down
HIVEP2	0.00153638	0.859261	0.00775555	down
LOC650368	0.000765776	0.719512	0.00490374	down
NRIP3	0.000321854	0.66535	0.00270474	down
PGRMC1	0.000149822	0.929571	0.00157011	down
KBTBD6	0.00146801	0.926726	0.00752211	down
DENND1A	2.79e-06	0.939974	5.88e-05	down
LOC100130872	1.22e-05	0.58359	0.000211156	down
SDHA	1.62e-06	0.96245	3.57e-05	down
NKAPL	0.000115564	0.701077	0.00129505	down
AP1M1	0.000141013	0.965277	0.00150312	down
CDRT4	7.93e-05	0.824652	0.000974029	down
STRC	0.000796945	0.667836	0.00503135	down
DLG2	1.85e-08	0.76066	5.92e-07	down
ADRA1B	0.000305369	0.617137	0.00259488	down
STUB1	0.00212845	0.958702	0.00968032	down
RAB11FIP4	8.5e-10	0.787463	3.1e-08	down
TEX2	0.00150298	0.920172	0.00763576	down
GABRG3	0.000807579	0.288041	0.0050765	down
GABRG1	0.000249519	0.740035	0.00225468	down
GPR137C	0.00220948	0.878777	0.00990622	down
PRDM2	1.07e-05	0.878759	0.000189217	down
PPP1R3F	8.41e-05	0.82553	0.0010142	down
PPP1R3D	9.53e-05	0.950971	0.00112393	down
GSTO2	0.000135199	0.714325	0.0014555	down
FAM153A	0.00100838	0.338438	0.00588626	down
ME1	1.44e-05	0.76836	0.000243311	down
SNORD44	0.00177671	NAN	0.00384808	down
SEZ6L2	0.000294982	0.837581	0.00253388	down
PRB1	0.00215481	0.175502	0.00975537	down
CCBE1	0.00038786	0.304475	0.00308395	down
AUH	3.81e-10	0.871601	1.46e-08	down
FRMPD4	0.00124892	0.493555	0.00674388	down
C3orf49	0.000128168	0.396329	0.00139963	down
C10orf82	0.00137878	0.350254	0.00722652	down
C10orf84	0.00213835	0.953868	0.00971234	down
GJB6	0.0019459	0.513195	0.00911462	down
MYRIP	0.0002396	0.76531	0.00219499	down
PSMC1	0.000656655	0.95626	0.00440732	down
PSMC6	7.11e-05	0.950444	0.000893	down
SNORD34	0.00177671	NAN	0.00384808	down
KIAA1239	0.00092839	0.380885	0.00555518	down
LIN7B	0.000196233	0.782882	0.00190841	down
CLSTN1	0.0016927	0.886407	0.0082879	down
STYK1	0.000826941	0.39786	0.0051399	down
CDKN2D	0.000573284	0.782901	0.00401335	down
WDR7	0.000581434	0.851411	0.00404092	down
FAM73A	0.000255951	0.824901	0.0023018	down
FAM73B	0.000276977	0.943846	0.00241972	down
CYP26B1	0.000824567	0.641179	0.00513218	down
SCOC	1.17e-05	0.918875	0.000202756	down
PABPC1L2B	0.000436257	0.521351	0.00333819	down
PABPC1L2A	0.00045096	0.439846	0.00342136	down
PCDHGB6	1.68e-05	0.840234	0.00027635	down
PCDH10	0.00177582	0.939211	0.00857849	down
ALKBH6	4.32e-05	0.865972	0.000600113	down
ARHGDIG	3.49e-05	0.675669	0.000506837	down
EPB49	0.00152328	0.728905	0.00770088	down
DNAJB4	4.72e-05	0.968605	0.000639125	down
SNORD121B	0.00177671	NAN	0.00384808	down
RNF149	1.73e-07	0.951239	4.72e-06	down
SNORD121A	0.00177671	NAN	0.00384808	down
GRSF1	0.000440403	0.96722	0.00336266	down
TMEM56	0.000480324	0.784293	0.00357667	down
RASGRF1	7.95e-05	0.706716	0.000974842	down
UBR4	0.000736057	0.962165	0.00475945	down
C16orf46	0.000154356	0.872413	0.00159774	down
GREM2	0.00160738	0.529603	0.00800572	down
INTU	0.00122916	0.908788	0.00667577	down
AGTPBP1	0.00104403	0.851577	0.00601973	down
SNAR-H	0.00177671	NAN	0.00384808	down
PPP1R3E	0.00109151	0.875771	0.00619346	down
OCIAD1	3.13e-06	0.955149	6.49e-05	down
RDH13	0.00115508	0.833861	0.00641432	down
TMEM191A	0.00070618	0.413193	0.00462157	down
FAM131B	4.54e-08	0.879153	1.38e-06	down
FAM131C	0.000484862	0.788746	0.00359763	down
SH3GLB2	7.14e-06	0.869044	0.000133058	down
INPP5A	0.000553531	0.871113	0.00392348	down
INPP5F	0.00176947	0.81247	0.00855933	down
PNPLA7	3.43e-07	0.779615	8.86e-06	down
PNPLA6	0.000708121	0.936534	0.00462837	down
ZBTB4	0.00021472	0.957223	0.00202676	down
THSD7B	0.00221938	0.693906	0.00993827	down
GPR83	0.000642873	0.470724	0.00433689	down
GLCE	6.91e-06	0.903562	0.000128784	down
GNAZ	1.01e-10	0.871489	4.15e-09	down
ANXA3	0.00040763	0.711284	0.00319292	down
ANXA7	0.000950597	0.96863	0.00564692	down
ZNF541	2.77e-05	0.512073	0.00042106	down
CYP26C1	0.000818877	0.377306	0.00512207	down
TBCC	0.000264015	0.936409	0.00234927	down
ZNF540	0.000755327	0.880621	0.004855	down
ZNF142	0.000748309	0.95919	0.00482321	down
RANGAP1	1.56e-06	0.888613	3.45e-05	down
SLC45A1	0.000451136	0.848251	0.00342143	down
SNORD51	0.00177671	NAN	0.00384808	down
C9orf172	0.000784109	0.721577	0.00497695	down
SNORD115-44	0.00177671	NAN	0.00384808	down
CCDC64	0.00207878	0.655569	0.00953168	down
MAP2K2	0.00160151	0.981388	0.00798422	down
SPTB	4.44e-05	0.658946	0.000610639	down
SNORD36C	0.00177671	NAN	0.00384808	down
SNORD115-48	0.00177671	NAN	0.00384808	down
SORCS2	9.78e-06	0.811614	0.000174451	down
SNORD11B	0.00177671	NAN	0.00384808	down
MAPK3	0.000895449	0.904812	0.005412	down
BCO2	0.00110025	0.821303	0.00621656	down
PPP1R12C	0.00018443	0.898639	0.00182387	down
ATP8A2	0.000141667	0.493532	0.00150851	down
ATP8A1	6.43e-05	0.815312	0.000825701	down
SERINC3	6.13e-05	0.915045	0.000793527	down
SNORD49B	0.00177671	NAN	0.00384808	down
C1orf107	0.000580211	0.951778	0.00403787	down
KCTD8	1.18e-06	0.673078	2.71e-05	down
KCNT1	0.000920889	0.55715	0.00552803	down
MTUS2	0.000824629	0.520316	0.00513218	down
SNORD116-19	0.00177671	NAN	0.00384808	down
SNORA35	0.00177671	NAN	0.00384808	down
SNORD116-11	0.00177671	NAN	0.00384808	down
PPP1R1A	0.000179696	0.803227	0.00178392	down
?|136542	0.00177671	NAN	0.00384808	down
ZBTB44	0.00188295	0.947317	0.0089092	down
SYNPR	5.75e-05	0.549884	0.000753332	down
NTNG2	6.28e-05	0.849171	0.00081128	down
PPP1R9A	0.00199391	0.893529	0.009276	down
WDTC1	0.000117556	0.938039	0.0013111	down
DSTYK	0.00154012	0.926458	0.00776487	down
WNT4	0.00015337	0.699998	0.00159266	down
PPP1R1B	4.93e-05	0.796731	0.000662844	down
KCNK12	0.000665744	0.633228	0.00444913	down
KCNK10	0.000768036	0.854005	0.00490682	down
SNORD59B	0.00177671	NAN	0.00384808	down
SNORD59A	0.00177671	NAN	0.00384808	down
ATXN2	5.61e-05	0.95325	0.000738399	down
ATXN3	2.69e-05	0.940929	0.000410432	down
DLK2	0.000476028	0.680817	0.00355247	down
GARNL3	3.7e-05	0.813233	0.000532519	down
THOP1	0.000454971	0.975567	0.00343874	down
GRIPAP1	0.000478721	0.903525	0.00356738	down
SNORD116-27	0.00177671	NAN	0.00384808	down
ARL8B	0.000126441	0.94346	0.0013881	down
SHISA7	1.29e-06	0.835972	2.92e-05	down
PYGM	0.000569186	0.788405	0.00399501	down
ZNF815	0.000174681	0.88041	0.00175066	down
GAGE2B	0.00177671	NAN	0.00384808	down
RICH2	0.000557828	0.678163	0.00393842	down
GAS7	7.46e-09	0.817708	2.51e-07	down
CAMK2N1	2.59e-05	0.819031	0.000396905	down
SNORD114-21	0.00177671	NAN	0.00384808	down
SNORD114-11	0.00177671	NAN	0.00384808	down
CPT1C	0.000370956	0.911498	0.00298656	down
CDC42BPA	0.00199101	0.926064	0.00926878	down
CDC42BPB	4.43e-05	0.930225	0.000609175	down
SNORD72	0.00177671	NAN	0.00384808	down
SNORD74	0.00177671	NAN	0.00384808	down
SNORD75	0.00177671	NAN	0.00384808	down
SNORD79	0.00177671	NAN	0.00384808	down
SNORD114-4	0.00177671	NAN	0.00384808	down
TMEM130	0.000393067	0.644169	0.00311449	down
CDKL5	0.00149323	0.550658	0.00760697	down
CDKL2	6.64e-06	0.584284	0.000124431	down
FBXO27	0.000137013	0.74047	0.00146886	down
TMEM155	0.000194203	0.521816	0.00189047	down
DBC1	0.0016163	0.787773	0.00803845	down
C11orf87	0.00116632	0.550551	0.00645755	down
FBXW7	0.00196456	0.79006	0.00918525	down
CRHR2	0.000526094	0.218196	0.00379638	down
CRHR1	0.00210371	0.626727	0.00961041	down
UBE2QL1	0.00205556	0.74838	0.00945565	down
C1D	0.000112565	0.929009	0.00126906	down
TCP10L	0.000435367	0.852795	0.00333511	down
TUBA4A	0.000223319	0.741055	0.00208113	down
VPS18	0.00175929	0.978021	0.00852315	down
MET	0.000497383	0.618695	0.00364949	down
C1orf128	4.73e-08	0.887524	1.43e-06	down
TPD52	3.16e-06	0.881416	6.56e-05	down
SACM1L	2.5e-07	0.953242	6.57e-06	down
XK	0.00141525	0.601175	0.00734828	down
C2orf39	0.000410042	0.556015	0.0031996	down
PCDHGB1	0.000103577	0.86153	0.00118995	down
PCDHGB5	1.09e-06	0.759117	2.53e-05	down
HRAS	2.58e-05	0.935685	0.000396664	down
PCDHGB4	5.21e-05	0.717556	0.00069379	down
C16orf89	3.13e-05	0.823915	0.000464868	down
SYT13	0.000548068	0.628041	0.00390458	down
SYT11	0.000176633	0.95135	0.00176375	down
SYT14	0.000893583	0.817983	0.00540998	down
RNU5E	0.00177671	NAN	0.00384808	down
PCDHGA9	0.000402078	0.80682	0.00316756	down
DDN	0.00146638	0.610108	0.00751682	down
PCDHGA7	1.89e-07	0.750965	5.14e-06	down
PCDHGA4	2.34e-05	0.83933	0.000364563	down
SNORD88C	0.00177671	NAN	0.00384808	down
GPR179	0.00115806	0.720225	0.00642564	down
PHF7	0.0021002	0.896728	0.0096008	down
NUAK1	0.000133276	0.773325	0.00144322	down
RNY5	0.00177671	NAN	0.00384808	down
RNY4	0.00177671	NAN	0.00384808	down
MICAL2	0.000731478	0.690802	0.00474428	down
KBTBD11	3.72e-05	0.882575	0.000532972	down
RIMBP2	0.00191843	0.615378	0.00902715	down
ATRN	0.00171544	0.958061	0.0083693	down
OPRK1	3.35e-05	0.444314	0.00048968	down
CHMP1B	0.000734586	0.950071	0.00475591	down
UCHL1	0.00113715	0.832804	0.00634474	down
MSL3L2	0.00123595	0.773979	0.00669468	down
PDE6C	2.02e-06	0.640439	4.37e-05	down
SOD1	0.00105962	0.967452	0.00607484	down
TERC	0.000372691	0.383059	0.002997	down
SNORD114-16	0.00177671	NAN	0.00384808	down
NBAS	0.000677697	0.972479	0.00450352	down
SLC4A10	0.00172411	0.663377	0.0084016	down
PRDM8	0.000208868	0.711636	0.00198981	down
DRD5	1.24e-05	0.317796	0.000213649	down
DRD1	6.78e-05	0.440355	0.000860763	down
OR5I1	0.00177671	NAN	0.00384808	down
TTC9B	0.000519781	0.68029	0.00376443	down
SNORD52	0.00177671	NAN	0.00384808	down
SNORD53	0.00177671	NAN	0.00384808	down
SNORD115-11	0.00177671	NAN	0.00384808	down
DCTN1	1.93e-08	0.896825	6.16e-07	down
SNORD113-9	0.00177671	NAN	0.00384808	down
SNORD113-5	0.00177671	NAN	0.00384808	down
SNORD113-6	0.00177671	NAN	0.00384808	down
SNORD113-1	0.00177671	NAN	0.00384808	down
SNORD113-2	0.00177671	NAN	0.00384808	down
SNORD114-14	0.00177671	NAN	0.00384808	down
KIF3A	0.00215005	0.871254	0.00974618	down
MRAP2	3.28e-05	0.618577	0.00048097	down
TMEFF2	0.000638585	0.821064	0.00432024	down
SNORD116-18	0.00177671	NAN	0.00384808	down
FOXK1	0.00081692	0.96222	0.00511478	down
HSPA12A	0.000385238	0.772675	0.00306905	down
KRTAP20-3	0.00177671	NAN	0.00384808	down
SNORD98	0.00177671	NAN	0.00384808	down
SNORD99	0.00177671	NAN	0.00384808	down
KIAA2018	0.00196282	0.959921	0.00918127	down
KCNB2	0.000903918	0.412289	0.00544526	down
HNRNPUL2	6.13e-06	0.977909	0.000116671	down
SNORD93	0.00177671	NAN	0.00384808	down
DEGS2	0.00154128	0.79126	0.00776693	down
GABRA2	0.00104565	0.567239	0.00602675	down
TXN	0.000589652	0.978587	0.00407723	down
SOD3	1.89e-06	0.857534	4.11e-05	down
SLC35E4	0.00102204	0.891309	0.00592914	down
MAP7D2	0.000279356	0.547543	0.00243429	down
TDRD6	0.00103025	0.74961	0.00595728	down
USP31	0.00101704	0.869254	0.00591328	down
APBB1	0.000153677	0.885566	0.00159504	down
PPP2R2B	1.59e-07	0.923836	4.37e-06	down
SNORD116-12	0.00177671	NAN	0.00384808	down
IPCEF1	0.00205693	0.702041	0.00945591	down
SUCLA2	0.000759413	0.910801	0.00487515	down
ACVR1C	0.00023444	0.616086	0.00215638	down
MAGEE1	0.00186642	0.759698	0.00885344	down
SLC27A2	0.000377709	0.354421	0.00302897	down
IRGQ	0.00202856	0.931466	0.00938581	down
FTO	0.000126901	0.957811	0.00138902	down
KLHL26	5.3e-14	0.763737	2.8e-12	down
CAPNS1	0.00011036	0.970256	0.00124832	down
CCNDBP1	8.78e-06	0.910463	0.000158894	down
C2orf15	0.000285679	0.692881	0.00247572	down
PSD4	6.37e-05	0.911096	0.00082011	down
LOC399815	0.000504924	0.508355	0.00369163	down
RAD23A	0.00146626	0.986235	0.00751682	down
ATP6V1E1	2.86e-06	0.893882	6.01e-05	down
HTR3B	0.00198812	0.197161	0.00926184	down
CUL2	0.00154455	0.934386	0.00777769	down
TMEM151A	0.000668808	0.729555	0.00446234	down
C2CD2L	0.00174996	0.839901	0.00850538	down
EPS15	0.000342242	0.899631	0.00282158	down
PPFIA2	7.92e-05	0.698784	0.000973284	down
RTN4	1.46e-07	0.910407	4.04e-06	down
NMS	0.00177671	NAN	0.00384808	down
PKP1	0.000428678	0.507529	0.00329864	down
SERTAD4	0.000218775	0.695345	0.00205276	down
PEBP1	8.01e-05	0.947625	0.000979545	down
POPDC3	8.31e-07	0.615449	1.97e-05	down
SNORD73A	0.00177671	NAN	0.00384808	down
LPO	0.000171682	0.443386	0.00172946	down
MBLAC2	0.00102865	0.843008	0.00595045	down
SPINK14	0.00177671	NAN	0.00384808	down
SPHAR	0.00125036	0.920466	0.00674547	down
GALNT9	0.00123687	0.711717	0.00669468	down
DMWD	0.00178661	0.906737	0.00860204	down
SNORD115-32	0.00177671	NAN	0.00384808	down
KIF12	0.000257932	0.214642	0.0023134	down
CBX7	0.000461807	0.837495	0.00347413	down
SNORD115-39	0.00177671	NAN	0.00384808	down
LOC221710	8.38e-05	0.897933	0.00101099	down
KIF1A	1.05e-08	0.863215	3.47e-07	down
KIF1B	0.000475106	0.934077	0.00354818	down
MRPS15	0.000273017	0.97166	0.00239958	down
PFKP	0.00116063	0.882481	0.00643646	down
SNURF	0.00115647	0.779479	0.00641857	down
SEH1L	0.000604563	0.917758	0.00415663	down
CLEC4G	0.000265422	0.340709	0.0023559	down
FZD8	5.66e-05	0.856484	0.000743026	down
DEFB128	0.00177671	NAN	0.00384808	down
DEFB127	0.00177671	NAN	0.00384808	down
DEFB122	0.00177671	NAN	0.00384808	down
MAGI2	0.00213135	0.966061	0.00968924	down
NGEF	0.000413736	0.691443	0.00321864	down
SLC25A22	0.00177994	0.813033	0.00858605	down
SLC25A27	0.000505746	0.804323	0.003695	down
MAGIX	0.00181864	0.871259	0.00870117	down
SELM	4.96e-07	0.820455	1.24e-05	down
SNAR-C4	0.00177671	NAN	0.00384808	down
RASAL1	2.24e-07	0.473445	6.01e-06	down
PCDHGA3	1.29e-05	0.705196	0.000221798	down
SLC12A5	0.000848068	0.602493	0.00523388	down
KCTD4	9.84e-13	0.661085	4.69e-11	down
ICAM5	0.000164462	0.568473	0.0016748	down
FBXL14	1.86e-06	0.973263	4.05e-05	down
LY6D	0.00099317	0.387665	0.00582476	down
PDYN	0.000158078	0.492508	0.00162511	down
LY6H	5.9e-05	0.716658	0.000770336	down
NEUROD2	0.00020391	0.53401	0.00196078	down
RALYL	0.000635238	0.648572	0.00430318	down
CDH13	0.000480566	0.80677	0.00357667	down
CDH12	0.00143986	0.485733	0.0074179	down
CREG2	0.000837242	0.524617	0.00518666	down
PLBD2	0.00167688	0.902815	0.0082478	down
NEFM	0.00105547	0.594361	0.00606358	down
NEFL	0.000569731	0.612652	0.00399676	down
NRG4	0.000923954	0.389188	0.00553843	down
LOC283731	0.00142647	0.351954	0.00737855	down
HAGH	0.000752508	0.922546	0.00484446	down
RPH3A	0.000820262	0.733168	0.00512313	down
HTR1E	0.00110942	0.317928	0.00624182	down
BCL2L2	2.59e-05	0.85163	0.000396905	down
SPINT2	0.000876735	0.770354	0.00535536	down
SPINT4	0.00177671	NAN	0.00384808	down
NAPG	0.000475484	0.89516	0.00354971	down
ITSN2	0.00102384	0.914212	0.00593267	down
C7orf41	0.00216786	0.885918	0.00978403	down
L3MBTL2	0.00118283	0.942039	0.00651809	down
PCMT1	0.000407238	0.91139	0.00319107	down
PVRL1	0.00201981	0.845921	0.00936737	down
SNORD116-10	0.00177671	NAN	0.00384808	down
ATG9A	4.62e-05	0.95517	0.000628986	down
SNORD116-13	0.00177671	NAN	0.00384808	down
SNORD116-15	0.00177671	NAN	0.00384808	down
SNORD116-14	0.00177671	NAN	0.00384808	down
SNORD116-16	0.00177671	NAN	0.00384808	down
EHD3	0.00211561	0.825245	0.00964329	down
XKRY	0.00177671	NAN	0.00384808	down
BAIAP2L2	0.00184563	0.773772	0.00878933	down
SNORD95	0.00177671	NAN	0.00384808	down
FASN	0.00154214	0.934204	0.00776746	down
KBTBD12	0.00111943	0.739993	0.00627602	down
SLC6A15	1.66e-05	0.574441	0.000274214	down
HSP90AA1	0.000403304	0.949092	0.00317114	down
SNORD90	0.00177671	NAN	0.00384808	down
SLC32A1	0.000180605	0.526283	0.00178948	down
TMEM184B	0.00178834	0.921517	0.00860636	down
NNAT	8.13e-10	0.666827	2.97e-08	down
KIAA1324	0.00029718	0.660358	0.0025485	down
SNORD114-18	0.00177671	NAN	0.00384808	down
SNORD92	0.00177671	NAN	0.00384808	down
CLASP2	0.00181993	0.940367	0.00870156	down
C1orf201	1.91e-07	0.692936	5.17e-06	down
C1orf204	8.85e-05	0.702195	0.00105637	down
AARS	2.32e-07	0.959786	6.17e-06	down
LOC200726	0.0002271	0.309524	0.00210395	down
ZDHHC8P1	5.61e-05	0.594625	0.000738399	down
ACTL6B	0.00188667	0.739882	0.00892475	down
C5orf53	5.7e-17	0.91995	3.67e-15	down
C5orf52	0.00156937	0.0798176	0.00785448	down
RAP1GAP2	0.00123248	0.730516	0.0066868	down
MAP2K4	0.0021424	0.849848	0.00972441	down
TAC3	0.00175883	0.480648	0.00852315	down
CLEC2L	9.96e-05	0.542865	0.00116227	down
TSSK2	0.00177671	NAN	0.00384808	down
SNORA70C	0.00177671	NAN	0.00384808	down
IQSEC3	0.00211242	0.653778	0.00963732	down
CD99L2	4.67e-09	0.918659	1.59e-07	down
GPRASP1	0.00071697	0.757029	0.00467579	down
TTL	2.69e-05	0.927017	0.000410432	down
SNORD114-15	0.00177671	NAN	0.00384808	down
GIT1	2.98e-05	0.916644	0.000445671	down
RASGEF1C	1.34e-13	0.865128	6.8e-12	down
PELI3	0.000793351	0.838441	0.00501608	down
NAPB	0.000718011	0.736894	0.00467961	down
CALB2	0.000993302	0.577611	0.00582476	down
SRPK2	0.000828434	0.927751	0.00514474	down
BDKRB1	0.00048517	0.373694	0.00359846	down
BDKRB2	5e-07	0.661536	1.25e-05	down
ADARB2	0.000684238	0.748453	0.00452665	down
WNT2B	0.000494226	0.748865	0.00363542	down
SLIT3	0.000392012	0.635603	0.00310974	down
SNORD19B	0.00177671	NAN	0.00384808	down
THEMIS	2.31e-05	0.454551	0.000362055	down
RGS7	0.00139781	0.690293	0.00728474	down
PLIN4	2.07e-05	0.70656	0.000331649	down
UPK3B	0.000545997	0.730113	0.00389213	down
SERINC1	1.63e-05	0.930134	0.000270886	down
GABRA5	2.12e-05	0.503614	0.000337871	down
NPFFR2	0.00015619	0.289285	0.00161297	down
NPFFR1	0.000446928	0.299233	0.0033983	down
ABTB1	0.00197557	0.862231	0.00921994	down
NXPH2	0.0014956	0.54838	0.00761712	down
ISLR2	0.00101353	0.573073	0.00590255	down
MDN1	0.000223228	0.931436	0.00208113	down
SNORD70	0.00177671	NAN	0.00384808	down
SEPHS2	0.00190078	0.958862	0.00897491	down
MLL2	0.001641	0.94597	0.00812584	down
YOD1	3.12e-05	0.954294	0.000463383	down
SNORD76	0.00177671	NAN	0.00384808	down
SAPS2	0.000773247	0.946527	0.00492241	down
?|317712	0.00177671	NAN	0.00384808	down
SNORD77	0.00177671	NAN	0.00384808	down
HBII-52-24	0.00177671	NAN	0.00384808	down
TRIM54	0.00101054	0.369687	0.00589553	down
VASN	1.78e-05	0.776831	0.000290627	down
PDZD7	0.000209517	0.614126	0.00199415	down
PKP4	0.00194585	0.908198	0.00911462	down
PSD3	0.00177902	0.815492	0.00858563	down
ASRGL1	0.000799981	0.948235	0.00504566	down
R3HDM2	0.0010568	0.934871	0.00606547	down
KIF5C	9.64e-06	0.844288	0.000172026	down
MASP2	0.000552126	0.893931	0.00392084	down
GLT1D1	0.00024576	0.565671	0.0022325	down
CD200	0.00101023	0.844187	0.00589539	down
CMIP	0.00214746	0.843032	0.0097409	down
PHACTR3	0.000802739	0.873317	0.0050615	down
MAFG	0.000317479	0.90957	0.00267673	down
SNAR-A13	0.00177671	NAN	0.00384808	down
SNORD60	0.00177671	NAN	0.00384808	down
TPRG1L	0.00114258	0.825431	0.00636213	down
ULBP1	0.0013296	0.657207	0.0070316	down
STK32C	0.00104414	0.796015	0.00601973	down
TXNDC8	0.00177671	NAN	0.00384808	down
SLC6A17	0.000217975	0.612368	0.00204807	down
DDIT4L	1.47e-06	0.773829	3.27e-05	down
TTTY3B	0.00177671	NAN	0.00384808	down
ADRB3	0.000697583	0.19371	0.00457991	down
ALDH1A3	3.01e-06	0.58007	6.29e-05	down
CALHM1	0.00110429	0.318615	0.00622492	down
SNORA11C	0.00177671	NAN	0.00384808	down
FXYD7	0.00037777	0.661434	0.00302897	down
FXYD1	2.27e-10	0.737232	9.04e-09	down
MAFK	0.00128991	0.851383	0.00688927	down
PLIN5	9.12e-10	0.704139	3.3e-08	down
RBP4	0.000606013	0.521724	0.0041652	down
TUBA8	0.000166953	0.673066	0.00169512	down
ARPC1A	0.000572403	0.985543	0.00401073	down
EGFL7	0.00171196	0.861254	0.00835431	down
HTR5A	0.00034329	0.431836	0.00282588	down
CYGB	0.00175761	0.660047	0.00852315	down
FAT2	0.00170075	0.792321	0.00831463	down
FLYWCH1	0.000850802	0.93493	0.00524563	down
ACO2	2.26e-07	0.941653	6.05e-06	down
TMEM66	0.00085687	0.956161	0.00527013	down
SNORD105B	0.00177671	NAN	0.00384808	down
RASGRF2	8.37e-05	0.656077	0.00101099	down
TMC5	0.000126834	0.418891	0.00138902	down
TTTY17B	0.00177671	NAN	0.00384808	down
WBSCR17	0.000342708	0.636455	0.00282222	down
SNORD6	0.00177671	NAN	0.00384808	down
SNORD7	0.00177671	NAN	0.00384808	down
SNORD5	0.00177671	NAN	0.00384808	down
SNORD2	0.00177671	NAN	0.00384808	down
FAM179B	0.000282568	0.898183	0.00245706	down
HOOK1	0.000453649	0.49834	0.00343289	down
TSC2	7.81e-06	0.973908	0.000144041	down
ABCC12	0.000999715	0.309672	0.00585067	down
ABCC11	1.18e-07	0.757703	3.31e-06	down
SNORD33	0.00177671	NAN	0.00384808	down
FLJ37307	0.00214716	0.476593	0.0097409	down
VTRNA1-2	0.00177671	NAN	0.00384808	down
CAMK2A	0.00131259	0.645668	0.00697796	down
CAMK2B	0.00108413	0.74063	0.006174	down
TMEM215	0.00118642	0.359447	0.00653185	down
APBA1	0.00215643	0.813702	0.00975574	down
ZSCAN18	4.1e-07	0.922357	1.04e-05	down
C6orf154	0.00151957	0.681303	0.00769065	down
ENOX1	0.000853792	0.908774	0.00525745	down
ANO4	0.00175778	0.676215	0.00852315	down
MC4R	0.000404589	0.415106	0.00318002	down
ATP2C1	0.000124027	0.957983	0.00137044	down
GRM3	0.000299788	0.714825	0.0025623	down
SLC25A26	0.00139777	0.965769	0.00728474	down
LHFPL5	0.000427438	0.289075	0.00329279	down
TLL2	0.000114164	0.655562	0.00128356	down
WFDC2	0.000514671	0.688496	0.0037429	down
RIMS1	0.00212599	0.676667	0.00967131	down
TAGLN3	0.000515165	0.760242	0.00374383	down
C10orf67	0.000178166	0.405605	0.00177513	down
SNORD54	0.00177671	NAN	0.00384808	down
VPREB3	0.000274648	0.756144	0.00240719	down
LOC286002	0.000981549	0.485405	0.00577895	down
RS1	0.000122219	0.441614	0.00135341	down
MT3	0.00196834	0.954213	0.00919665	down
HEATR4	0.000942759	0.537231	0.00561645	down
SNTG2	0.000101198	0.395152	0.00117312	down
OSBPL1A	0.000464339	0.85154	0.00348296	down
FAM163B	0.000387682	0.524547	0.00308389	down
JAKMIP1	0.000562503	0.678213	0.00396029	down
NOMO1	0.00134537	0.960938	0.00709127	down
RSPO4	0.000587395	0.834473	0.00406768	down
ECHS1	0.00114606	0.958408	0.00637544	down
FAM24B	6.49e-06	0.780684	0.000122118	down
MADD	0.00143826	0.878774	0.00741523	down
RAPGEF4	9.9e-05	0.782553	0.00115673	down
SNORD114-8	0.00177671	NAN	0.00384808	down
AGMAT	0.00216394	0.714237	0.00977893	down
IL34	0.000879426	0.690976	0.00536423	down
FZD9	1.29e-06	0.793204	2.93e-05	down
SNCA	4.15e-06	0.691099	8.27e-05	down
SLC24A2	0.000617298	0.646157	0.0042165	down
SNORD55	0.00177671	NAN	0.00384808	down
SNORD56	0.00177671	NAN	0.00384808	down
SNORD57	0.00177671	NAN	0.00384808	down
DDHD1	0.000138381	0.943778	0.00147736	down
ZBTB11	0.000200188	0.927813	0.00193497	down
DNAJC16	0.000213787	0.921188	0.00201987	down
DNAJC12	0.00024906	0.881912	0.00225252	down
DNAJC11	0.000558835	0.9498	0.00393986	down
NAT8L	0.00218684	0.858457	0.00983048	down
SLITRK1	2.62e-17	0.751953	1.72e-15	down
PPP4R4	0.00167076	0.607248	0.00822361	down
TTTY21	0.00177671	NAN	0.00384808	down
TBRG1	0.000664187	0.914198	0.00444017	down
EME2	0.0016383	0.730046	0.00811444	down
SNORD50A	0.00177671	NAN	0.00384808	down
SNORD117	0.00177671	NAN	0.00384808	down
SNORD110	0.00177671	NAN	0.00384808	down
SNORD111	0.00177671	NAN	0.00384808	down
MAL2	0.000205709	0.504551	0.00197254	down
KRTAP12-4	0.00177671	NAN	0.00384808	down
CDHR1	0.00141908	0.921853	0.0073594	down
STX1A	0.0017284	0.69219	0.00842051	down
STX1B	0.000848179	0.768613	0.00523388	down
KRT81	0.000663987	0.396017	0.00444017	down
SNAR-A2	0.00177671	NAN	0.00384808	down
SNAR-A4	0.00177671	NAN	0.00384808	down
SPOCK1	0.000641766	0.850615	0.00433261	down
MAST3	1.97e-06	0.758588	4.26e-05	down
CYP1A1	0.000105041	0.473083	0.00120206	down
ZBTB7A	4.66e-05	0.85848	0.000632317	down
C5orf30	0.00116354	0.84827	0.00644456	down
C9orf72	6.57e-05	0.936935	0.000839797	down
LOC285696	0.00163761	0.524184	0.00811444	down
PCDHGA11	2.38e-07	0.792442	6.3e-06	down
PCDHGA12	0.000890852	0.723346	0.00540403	down
COQ10B	0.00146952	0.936132	0.00752724	down
ZFYVE1	0.00198211	0.98163	0.00924203	down
LDOC1	7.33e-07	0.880475	1.77e-05	down
RXFP1	0.000102443	0.37605	0.00118053	down
RGNEF	0.00191814	0.63088	0.00902715	down
PITRM1	0.00196734	0.924565	0.00919614	down
GOT2	2.74e-05	0.893122	0.000417377	down
GOT1	0.000564452	0.796233	0.00397128	down
ACCN1	0.000129489	0.548451	0.00141105	down
OR2T8	0.000240804	0.223875	0.00220406	down
TTTY12	0.00177671	NAN	0.00384808	down
CCDC87	0.00203647	0.802154	0.0094058	down
STMN4	1.4e-06	0.81915	3.14e-05	down
STMN2	0.00062224	0.718425	0.00424264	down
UBE3B	0.000342356	0.972921	0.00282158	down
SNORD32A	0.00177671	NAN	0.00384808	down
SDC4	7.39e-07	0.893916	1.78e-05	down
AMY1A	0.000575923	0.595313	0.00402009	down
DUSP8	0.000555358	0.786403	0.00392787	down
LRRC8B	7.84e-07	0.845158	1.88e-05	down
GPR52	0.000420246	0.165981	0.00325204	down
IKBKAP	4.21e-05	0.960028	0.000589878	down
DGKQ	0.0010536	0.879968	0.00605726	down
VKORC1L1	0.000199853	0.958596	0.00193354	down
DGKE	0.000763193	0.671112	0.00489177	down
SNORD43	0.00177671	NAN	0.00384808	down
ZNF169	0.00129461	0.876745	0.00691065	down
NCRNA00087	0.0014388	0.676589	0.00741617	down
VSNL1	0.000445698	0.618813	0.00339021	down
RHCG	0.000223438	0.483224	0.0020813	down
PDE2A	0.00148052	0.760057	0.00755908	down
SNORD114-12	0.00177671	NAN	0.00384808	down
SEMA4A	0.000630411	0.742278	0.00427704	down
GABRB2	0.00162585	0.592565	0.00808005	down
OTUD7A	0.000134088	0.740294	0.00144743	down
C10orf114	0.00217903	0.820127	0.0098147	down
TNRC6B	7e-05	0.971792	0.000882482	down
CRTAC1	0.00212199	0.949007	0.00965741	down
ENC1	0.00178292	0.734968	0.00858829	down
WNK2	0.00125159	0.763122	0.00674547	down
TSTD1	0.000364757	0.694086	0.00295286	down
VWA5B2	0.000275793	0.666863	0.00241451	down
KIAA0319	0.00138937	0.657251	0.00726556	down
BNIP3	3.22e-05	0.932385	0.000474791	down
UBQLN1	0.00036063	0.935804	0.00292522	down
SNORD71	0.00177671	NAN	0.00384808	down
OTUD5	0.000795538	0.948186	0.0050269	down
CCDC8	0.000743474	0.865348	0.00479728	down
BSDC1	0.0005495	0.973216	0.00390625	down
MFSD6	0.000925742	0.852869	0.00554419	down
NEFH	0.00111947	0.69834	0.00627602	down
EGLN2	0.000273368	0.938582	0.00240148	down
PCLO	0.000413052	0.626387	0.0032182	down
C6orf114	0.000847938	0.595176	0.00523388	down
LOC100302640	0.000157043	0.840447	0.00161903	down
PRR20B	0.00177671	NAN	0.00384808	down
GLS2	0.000918625	0.570998	0.00551766	down
ANKH	7.21e-06	0.910723	0.00013407	down
SNAR-C3	0.00177671	NAN	0.00384808	down
SNAR-C2	0.00177671	NAN	0.00384808	down
ESYT3	0.000945006	0.557397	0.0056251	down
MINK1	0.000414008	0.904874	0.00321938	down
RAP1GAP	0.000301743	0.790253	0.00257152	down
EXOC3	0.000433712	0.956589	0.00332864	down
DEFB107A	0.00177671	NAN	0.00384808	down
EXOC8	0.000653524	0.921408	0.00439176	down
ANK2	0.00066931	0.884404	0.00446279	down
ANK3	2.19e-05	0.74611	0.00034644	down
IDH3A	0.00062472	0.904288	0.00425249	down
ARSF	0.00145357	0.80689	0.00746976	down
PPL	0.00116722	0.606582	0.00646079	down
ARHGEF4	0.00188035	0.912144	0.00890177	down
CDH9	0.000396799	0.421113	0.00313439	down
CDH8	0.000466775	0.575177	0.00349613	down
PROKR2	0.00016057	0.22127	0.00164444	down
PALM	0.00164206	0.868224	0.00812911	down
CENPV	2.59e-11	0.831542	1.12e-09	down
SPRED1	8.68e-25	0.960667	9.09e-23	down
DHX30	3.74e-06	0.97157	7.59e-05	down
RPP25	1.1e-05	0.722594	0.00019251	down
SUPT6H	1.66e-05	0.982948	0.000273836	down
DOPEY1	0.001318	0.940494	0.00699009	down
TSR2	0.000160599	0.929343	0.00164444	down
GREB1	0.00113997	0.874746	0.00635451	down
RNLS	5.18e-05	0.807779	0.000691058	down
SNORD88A	0.00177671	NAN	0.00384808	down
CELF5	0.00176142	0.742352	0.00853076	down
CADM1	0.00121821	0.968814	0.00664093	down
CNNM1	0.00131776	0.621946	0.00699009	down
CNNM2	4.19e-05	0.863874	0.000587006	down
CNNM4	3.66e-05	0.92161	0.000527917	down
HHLA2	0.00204119	0.525221	0.00941487	down
PHF15	0.00131728	0.906585	0.00699009	down
FBRSL1	8.27e-15	0.960826	4.52e-13	down
EZH1	1.83e-12	0.932756	8.54e-11	down
SLC6A7	0.000525018	0.416807	0.0037921	down
SLC6A6	0.00139218	0.896343	0.00726896	down
YDJC	0.000102447	0.819669	0.00118053	down
ZNF667	0.000355718	0.824499	0.00289912	down
C12orf51	0.000986953	0.893602	0.00580411	down
MAPRE3	0.000803917	0.831462	0.00506609	down
MAPRE2	0.000104631	0.920054	0.00119938	down
ANKRD43	0.000295381	0.645923	0.00253625	down
AQP8	0.00109741	0.612383	0.00620837	down
GPR150	1.79e-05	0.220954	0.000291907	down
BDNF	0.000825531	0.540145	0.00513403	down
C10orf137	1.52e-05	0.963304	0.000254135	down
YPEL2	0.000231797	0.829909	0.00213974	down
CDK5R2	0.00157887	0.712582	0.00789053	down
EPHB6	0.00034641	0.676813	0.00284586	down
FGF22	0.000269518	0.285424	0.00238398	down
SNORD36B	0.00177671	NAN	0.00384808	down
SH3GL3	0.000237458	0.688536	0.00217731	down
NPY	0.000389188	0.657995	0.00309212	down
SLC10A5	0.00109148	0.657508	0.00619346	down
PART1	0.00110151	0.643805	0.00621656	down
TYRO3	5.87e-06	0.859573	0.000112655	down
SNAR-I	0.00177671	NAN	0.00384808	down
LOC100189589	1.84e-05	0.417249	0.000298866	down
VTRNA1-3	0.00177671	NAN	0.00384808	down
VTRNA1-1	0.00177671	NAN	0.00384808	down
LGI1	0.000187317	0.744896	0.00184353	down
SNORD41	0.00177671	NAN	0.00384808	down
KCNS1	0.00146815	0.517941	0.00752211	down
KCNS2	0.00181615	0.422647	0.00869737	down
KCNS3	0.0019453	0.864209	0.00911462	down
ZCCHC2	0.000290722	0.896329	0.00250884	down
C6orf136	7.07e-05	0.887571	0.000889615	down
SNORD62A	0.00177671	NAN	0.00384808	down
SPG7	0.000719716	0.971762	0.00468626	down
KIAA0664	0.00164941	0.961505	0.00814981	down
PHYHIP	0.000768798	0.700529	0.00490682	down
SLC2A12	0.00175148	0.873244	0.00850872	down
HTR6	0.000772143	0.370208	0.0049184	down
HTR7	0.0010633	0.575977	0.00608913	down
HTR4	0.00175271	0.378411	0.00851137	down
KLHL2	6.75e-07	0.824067	1.64e-05	down
KLHL3	4.33e-05	0.763375	0.000600851	down
KLHL1	2.11e-05	0.262942	0.00033625	down
RP1	0.000696091	0.523944	0.0045745	down
TBR1	0.000150284	0.484468	0.00157094	down
SOHLH1	7.74e-05	0.417164	0.000955817	down
CMAS	0.000787125	0.863386	0.00498602	down
WHAMML1	0.000823919	0.914094	0.00513218	down
TMEM132C	0.000109408	0.847921	0.00123959	down
NELL2	0.000820499	0.730443	0.00512313	down
BSCL2	0.00130772	0.837686	0.00696073	down
CLDN10	6.58e-05	0.726964	0.000840269	down
CLDN16	0.000571732	0.172281	0.0040074	down
GAD2	0.000269829	0.508067	0.0023857	down
LCE3B	0.00177671	NAN	0.00384808	down
SNORD116-5	0.00177671	NAN	0.00384808	down
SNORD103A	0.00177671	NAN	0.00384808	down
ZNF529	0.000154342	0.956698	0.00159774	down
SLC5A8	0.00103232	0.165191	0.00596667	down
YJEFN3	0.0015558	0.773104	0.00780804	down
BCL11A	0.000140182	0.60899	0.00149581	down
BCL11B	0.000528585	0.753273	0.00380926	down
UBQLN2	0.00126502	0.945349	0.00679507	down
WHAMM	0.000999334	0.985373	0.00585067	down
ULK2	0.00151106	0.905578	0.00765975	down
HRNBP3	0.000735945	0.583268	0.00475945	down
SNORD42B	0.00177671	NAN	0.00384808	down
FKBP4	0.00201362	0.947563	0.0093444	down
FKBP8	0.000190138	0.940244	0.00186415	down
SNORD42A	0.00177671	NAN	0.00384808	down
SNORD37	0.00177671	NAN	0.00384808	down
GRB10	0.000512302	0.93927	0.00373228	down
ZNF460	0.000886407	0.848724	0.00538879	down
GPR12	0.000384996	0.623862	0.00306831	down
EMX2	0.00119639	0.821257	0.0065621	down
C12orf39	8.45e-08	0.763952	2.44e-06	down
EMX1	0.000724326	0.435662	0.0047103	down
SNORD114-1	0.00177671	NAN	0.00384808	down
LOC158696	0.00045003	0.525437	0.00341557	down
ZNF324B	0.000301589	0.90681	0.00257127	down
RAP1GDS1	6.77e-15	0.888782	3.73e-13	down
RCAN2	5.1e-08	0.734419	1.53e-06	down
CELSR2	6.37e-06	0.896629	0.000120498	down
PARVB	0.000938446	0.863104	0.00560151	down
STXBP1	0.00220937	0.793537	0.00990622	down
CCNYL1	0.000731478	0.957012	0.00474428	down
CXorf22	0.00135223	0.678858	0.00711645	down
ZFYVE21	0.000157092	0.964143	0.00161903	down
ABCA5	0.000527322	0.711314	0.00380391	down
ABCA3	0.00094596	0.954403	0.00562717	down
RTP1	0.000346329	0.577476	0.00284586	down
NDUFA10	0.000704406	0.946269	0.00461714	down
DKK2	0.000167755	0.57251	0.00170159	down
DKK3	0.0010595	0.874322	0.00607484	down
HPS1	8.44e-06	0.885213	0.000153596	down
LOC440905	1.72e-05	0.557159	0.000282634	down
NCKIPSD	0.00173519	0.908743	0.00844565	down
KIRREL3	3.75e-16	0.670694	2.31e-14	down
SVOP	0.000528806	0.623034	0.00380926	down
YIPF5	0.00106844	0.983251	0.00610555	down
YPEL4	0.000278605	0.800799	0.00243084	down
ZNF706	0.000178346	0.957312	0.00177513	down
PPP2R4	0.0012166	0.943895	0.00663925	down
PNMT	0.000430021	0.587302	0.00330773	down
ZBTB45	0.000216403	0.95218	0.00203796	down
HDAC5	0.0016715	0.948332	0.00822527	down
SKAP2	9.52e-05	0.896536	0.0011229	down
SNORD115-33	0.00177671	NAN	0.00384808	down
SNORD115-30	0.00177671	NAN	0.00384808	down
USP5	2.1e-12	0.94464	9.76e-11	down
SNORD115-31	0.00177671	NAN	0.00384808	down
ZNF721	0.000855979	0.953168	0.00526776	down
RGS4	0.000585658	0.632688	0.00405927	down
FAM181A	3.07e-07	0.873966	7.98e-06	down
SNORD114-2	0.00177671	NAN	0.00384808	down
ATP2C2	0.00010011	0.670698	0.00116446	down
TSNARE1	4.93e-05	0.932045	0.000662844	down
MPP2	0.0008301	0.857519	0.00515018	down
MPP7	0.00169816	0.548662	0.00830865	down
FAM110C	6.47e-05	0.435647	0.000829119	down
SNORD115-38	0.00177671	NAN	0.00384808	down
LRTM2	0.00110691	0.570568	0.0062328	down
PNMAL2	0.000556284	0.75605	0.00393081	down
CRHBP	1.51e-06	0.602965	3.35e-05	down
SNORD18C	0.00177671	NAN	0.00384808	down
RALGPS1	0.000732944	0.900899	0.00475129	down
CORO2B	0.000585207	0.936469	0.00405752	down
CORO2A	0.00196351	0.649244	0.00918242	down
OTOF	0.00141427	0.457718	0.0073451	down
STK31	0.000607084	0.471158	0.00416632	down
SNORD12B	0.00177671	NAN	0.00384808	down
NXNL1	0.00182363	0.312524	0.00871203	down
SYN2	9.59e-05	0.617395	0.0011281	down
GGNBP2	0.000210611	0.972664	0.00199993	down
SYN1	0.000462174	0.717467	0.00347514	down
TMEFF1	3.83e-05	0.869302	0.000546669	down
CHRNB4	0.00169139	0.399118	0.00828743	down
RBM11	0.000311121	0.575679	0.00263459	down
CHGA	6e-07	0.698331	1.48e-05	down
SNORD114-19	0.00177671	NAN	0.00384808	down
SNORD114-13	0.00177671	NAN	0.00384808	down
SNORD114-17	0.00177671	NAN	0.00384808	down
MAP3K10	0.00169116	0.809206	0.00828743	down
PEG3	0.000529475	0.801805	0.00381018	down
JAKMIP3	0.000217517	0.728957	0.0020447	down
CACYBP	0.00167849	0.941531	0.00825175	down
CT47A11	0.00177671	NAN	0.00384808	down
CT47A10	0.00177671	NAN	0.00384808	down
DYDC2	0.00140199	0.44043	0.00729787	down
ARX	0.00200356	0.646221	0.00931032	down
SNORD116-8	0.00177671	NAN	0.00384808	down
RYR3	1.25e-05	0.69794	0.000215401	down
RYR2	0.000560435	0.516707	0.00394978	down
SNORD116-1	0.00177671	NAN	0.00384808	down
SNORD116-3	0.00177671	NAN	0.00384808	down
SNORD116-2	0.00177671	NAN	0.00384808	down
GOLGA2	2.22e-08	0.957164	7.04e-07	down
GOLGA3	4.5e-05	0.949108	0.000616483	down
KIAA1244	0.000130777	0.79655	0.00142131	down
ENPP5	0.000644519	0.830553	0.00434405	down
SLC2A6	0.00102185	0.850431	0.00592914	down
DNM1	0.000667251	0.713129	0.0044534	down
DNM3	3.71e-08	0.843562	1.14e-06	down
SMYD1	0.000282117	0.407246	0.00245418	down
SNORD85	0.00177671	NAN	0.00384808	down
SNORD84	0.00177671	NAN	0.00384808	down
SNORD82	0.00177671	NAN	0.00384808	down
STK25	0.000811375	0.95468	0.00509536	down
SDR16C5	0.000281229	0.370084	0.00244749	down
SLC6A19	0.0014329	0.23385	0.00739804	down
C17orf28	6.47e-05	0.801288	0.000829672	down
ZFYVE27	3.99e-05	0.9085	0.000565248	down
SNORD32B	0.00177671	NAN	0.00384808	down
SLC13A2	0.000206564	0.138996	0.0019752	down
TCEAL7	2.33e-05	0.859791	0.00036254	down
TCEAL6	0.00123894	0.7205	0.00670235	down
KNCN	1.11e-06	0.30865	2.56e-05	down
STOX2	0.00126578	0.793077	0.00679741	down
PRPS2	0.00108633	0.847681	0.0061831	down
CAND2	3.16e-05	0.904006	0.00046699	down
LDHD	0.00032781	0.875076	0.00274804	down
C8orf85	5.05e-07	0.393288	1.26e-05	down
SLC7A14	1e-05	0.744449	0.000177908	down
NPY5R	0.00106637	0.403494	0.00610162	down
ARHGEF10L	0.0011871	1.09829	0.00653385	up
NCBP2	0.000367773	1.0921	0.00296913	up
DISC1	2.19e-05	1.18424	0.00034644	up
RPL37	0.00154652	1.08306	0.00778381	up
SPR	2.4e-05	1.12999	0.000371107	up
DHX8	0.000825747	1.0258	0.00513403	up
NUP93	0.00177671	1.06404	0.00857851	up
GOLIM4	0.00053832	1.15718	0.00384808	up
GTSE1	1.76e-05	2.28726	0.000288065	up
FAM183A	0.000300167	9.14124	0.00256447	up
SPPL2A	9.57e-05	1.11288	0.00112599	up
ITGA7	4.16e-05	1.03075	0.000583116	up
DENND4C	0.000165837	1.10149	0.00168713	up
CHST9	9.37e-11	1.57116	3.88e-09	up
COL4A4	7.53e-08	1.25661	2.2e-06	up
NOG	0.000488547	1.20803	0.00360917	up
SMAD1	0.000376357	1.12279	0.00302293	up
AMMECR1L	0.0011464	1.06984	0.00637544	up
TMPRSS11B	1.22e-10	INF	4.97e-09	up
TMPRSS11D	7.86e-30	INF	1.02e-27	up
RAD21L1	3.17e-47	INF	8.79e-45	up
ART4	6.1e-54	INF	2.24e-51	up
BFAR	0.000267574	1.05699	0.00237087	up
LEO1	0.00153944	1.03557	0.00776336	up
BPESC1	4.1e-12	INF	1.88e-10	up
CBLB	8.45e-06	1.24184	0.000153596	up
RBMXL3	7.78e-18	INF	5.32e-16	up
POU5F1B	1.17e-05	2.4793	0.000202756	up
MCM10	5.89e-06	2.61752	0.000112854	up
PDIA5	1.17e-05	1.21615	0.000203658	up
ATG4A	0.00085085	1.12176	0.00524563	up
PHOX2B	1.89e-20	INF	1.54e-18	up
SIX6	1.55e-56	INF	6.34e-54	up
MR1	0.000814048	1.23261	0.00510147	up
MGC4473	8.28e-25	INF	8.76e-23	up
RFX4	0.00019646	1.15002	0.00190881	up
RFX7	6.69e-05	1.08461	0.000851925	up
NLRP13	7.01e-09	INF	2.36e-07	up
XPNPEP2	0.00203299	2.08866	0.00939534	up
TMEM218	0.00183586	1.24373	0.00874891	up
VPS37B	0.000770168	1.04061	0.0049089	up
DPYSL3	3.81e-06	1.17656	7.71e-05	up
KRTAP10-12	0.000337217	INF	0.00279607	up
KRTAP10-11	0.00181794	INF	0.00870117	up
IGFBP2	0.00219075	1.30035	0.00984377	up
IGFBP7	0.000225641	1.16524	0.00209706	up
CKLF	0.00209152	1.21304	0.00957391	up
GJA8	8.1e-18	INF	5.52e-16	up
KDM3B	0.000185079	1.06123	0.00182852	up
KDM3A	0.000534847	1.09291	0.00383214	up
C20orf56	5.08e-22	INF	4.48e-20	up
TXNIP	0.000285419	1.18652	0.00247452	up
IFI16	0.0020283	1.1762	0.00938581	up
SOX6	0.00086501	1.2454	0.00530585	up
LOC440944	0.000808861	1.06398	0.00508293	up
CFHR2	0.00109193	INF	0.00619346	up
KRTAP2-1	0.000582972	INF	0.00404748	up
RIT1	0.00010247	1.14102	0.00118053	up
HAS2	0.00113467	1.64938	0.00633817	up
HLA-DPA1	0.00168315	1.12587	0.00826378	up
ZNF559	0.000288845	1.16096	0.00249683	up
PHLDA1	6.28e-07	1.22888	1.54e-05	up
C11orf17	0.00086311	1.08026	0.00530052	up
ZCCHC13	0.00139088	INF	0.00726896	up
CDC5L	0.000764618	1.01099	0.00489882	up
RCL1	0.000598665	1.07962	0.00412436	up
CPLX4	2.73e-37	INF	5.5e-35	up
LILRB3	0.00183467	1.41703	0.00874705	up
PRAMEF4	1.36e-07	INF	3.78e-06	up
PRAMEF6	2.9e-05	INF	0.000436608	up
PRAMEF1	0.000153256	INF	0.00159241	up
PRAMEF2	4.32e-06	INF	8.56e-05	up
OR7G1	0.0010574	INF	0.00606721	up
PRDM9	2.91e-06	INF	6.11e-05	up
ERGIC3	2.82e-05	1.09939	0.000426302	up
ERGIC1	0.00156325	1.07781	0.00783535	up
GSDMD	0.000148107	1.11698	0.0015577	up
DLGAP5	6.04e-13	6.21525	2.92e-11	up
BRD8	0.000529133	1.01968	0.00381018	up
PTPN12	0.000133619	1.11893	0.00144458	up
MYCBP	0.00102714	1.21558	0.00594508	up
C8orf30A	0.000681816	1.09141	0.00451922	up
C16orf78	6.12e-06	INF	0.000116526	up
ZSCAN2	0.000481816	1.07535	0.00358155	up
HOXA6	1.13e-61	INF	5.94e-59	up
HOXA5	1.47e-85	INF	1.68e-82	up
HOXA4	1.02e-08	8.27995	3.39e-07	up
HOXA3	7.7e-09	11.852	2.59e-07	up
HOXA2	1.32e-66	INF	8.77e-64	up
CLNS1A	0.000395449	1.11476	0.00312613	up
HOXA1	1.35e-06	7.98961	3.03e-05	up
R3HDML	4.95e-09	INF	1.68e-07	up
PABPC1P2	4.47e-54	INF	1.7e-51	up
ZNF581	0.000426664	1.15111	0.00328807	up
LPAR6	7.73e-05	1.08031	0.000954846	up
HOXA9	5.5e-07	15.2999	1.37e-05	up
OR8U1	0.000893202	INF	0.00540994	up
LPAR5	0.00182	1.03408	0.00870156	up
ZP2	2.56e-06	INF	5.45e-05	up
OR52N5	0.000161954	INF	0.00165642	up
NDC80	7.86e-05	4.56399	0.000967651	up
OR52N1	3.98e-06	INF	7.98e-05	up
SULT6B1	6.95e-17	INF	4.43e-15	up
HOXA13	4.46e-05	12.5992	0.000612631	up
HOXA11	3.58e-101	INF	5.66e-98	up
HOXA10	1.2e-14	8.58284	6.52e-13	up
KRTAP19-8	9.57e-06	INF	0.000171061	up
SRI	1.15e-06	1.11469	2.64e-05	up
SRR	1.77e-08	1.10836	5.69e-07	up
LGALS1	0.00130039	1.0392	0.00692926	up
EIF2AK1	0.000409856	1.05119	0.00319939	up
ERCC6L	4.62e-09	1.87763	1.58e-07	up
NMB	0.000688466	1.5049	0.00453456	up
FAM136B	1.34e-39	INF	3.02e-37	up
ASAP3	0.000580701	1.09632	0.00403855	up
KRT28	2.98e-07	INF	7.78e-06	up
TBX2	0.000272334	1.26696	0.00239556	up
LOX	0.00027684	1.17633	0.00241955	up
PRKX	0.000458297	1.25536	0.00345373	up
GCNT2	0.000440438	1.15809	0.00336266	up
C14orf135	0.000190702	1.07732	0.001867	up
LOC440957	0.00130046	1.09455	0.00692926	up
LPCAT3	0.00122947	1.14886	0.00667577	up
CALCRL	3.73e-06	1.3434	7.57e-05	up
C20orf185	1.52e-06	INF	3.38e-05	up
PIGW	0.0012347	1.09815	0.00669354	up
ALPP	2.11e-26	INF	2.41e-24	up
INPPL1	5.42e-06	1.1079	0.000104804	up
SEC61A1	0.000259494	1.10684	0.00231929	up
PECR	0.00113462	1.15543	0.00633817	up
[truncated: 2,882 more rows]
