# Supplementary material for: Integrative analysis of DNA methylation and gene expression to identify key epigenetic genes in glioblastoma
Source: Aging (Albany NY). 2019 Aug 8;11(15):5579–92. doi: 10.18632/aging.102139 (PMC6710056; doi:10.18632/aging.102139)
Supplement: Supplementary Table 6 [file aging-11-102139-s009.xlsx]

## Sheet: Sheet1
CPG	P_value	HR	95%CI_lower	95%CI_upper
cg20250521	5.08585e-06	0.000295448	8.99166e-06	0.00970786
cg10353539	5.67383e-06	46.9763	8.9089	247.704
cg23700125	7.21279e-06	37.331	7.68108	181.433
cg09479579	7.59308e-06	41.2709	8.09536	210.403
cg16188209	1.45435e-05	273.218	21.6285	3451.38
cg08236022	2.05569e-05	859503	1596.57	4.62708e+08
cg08470875	2.36378e-05	13.8107	4.08862	46.6503
cg06765785	2.36913e-05	130.408	13.6291	1247.79
cg04627871	2.43932e-05	41.4831	7.35389	234.005
cg07203098	2.99575e-05	1.59273e+37	5.40059e+19	4.69727e+54
cg07045816	3.28583e-05	50129.6	303.23	8.28737e+06
cg15114672	3.36024e-05	7.28302e+09	159149	333286719536705
cg22609034	3.47487e-05	236.934	17.799	3153.98
cg03314195	3.64414e-05	371.095	22.376	6154.42
cg19407459	3.70642e-05	25.2842	5.44885	117.326
cg02104162	4.15126e-05	25.1971	5.38603	117.878
cg10978355	4.27615e-05	14.4232	4.01702	51.7867
cg12177743	4.45378e-05	17.0201	4.36518	66.3623
cg04692156	5.27117e-05	5.04585e-05	4.16813e-07	0.00610839
cg10788217	5.65511e-05	18.5758	4.4803	77.0175
cg06177627	5.73766e-05	19.5738	4.59663	83.3513
cg17445840	5.78491e-05	2.55007e+08	20387	3.18969e+12
cg21462732	6.01998e-05	38.4704	6.4678	228.821
cg20173059	6.20772e-05	14.5996	3.93101	54.2224
cg10201663	6.28098e-05	4111.59	69.8332	242080
cg13289019	6.31939e-05	183.131	14.2621	2351.48
cg21177626	7.05981e-05	80.4127	9.2403	699.782
cg03865257	7.20641e-05	177.747	13.7693	2294.52
cg22727641	7.56246e-05	29.2671	5.49815	155.791
cg23411654	7.61108e-05	164.757	13.1407	2065.7
cg24727203	7.77868e-05	110.946	10.7307	1147.09
cg24451422	7.78666e-05	23.5322	4.91137	112.751
cg18938907	7.83804e-05	84.7483	9.35913	767.409
cg01153660	7.93029e-05	1.11309e+08	11229.3	1.10335e+12
cg11928275	8.08572e-05	26.7839	5.22284	137.354
cg09896346	8.41008e-05	16.0009	4.01775	63.7246
cg12532653	8.48779e-05	34.7432	5.92171	203.841
cg14903097	9.10165e-05	120233	343.365	4.21009e+07
cg21127537	9.14146e-05	28.7058	5.34032	154.303
cg07898446	9.26302e-05	107.759	10.3138	1125.87
cg17901463	9.43823e-05	51.717	7.13596	374.813
cg25098077	9.4434e-05	19.7059	4.41301	87.9951
cg06650786	9.80309e-05	34.2843	5.79052	202.989
cg16727862	9.87902e-05	1362.57	36.0214	51541.8
cg21809331	0.000100825	5.02005e+48	1.42617e+24	1.76704e+73
cg26459819	0.000101726	16.1409	3.96971	65.6288
cg06008480	0.000106287	12.808	3.52722	46.5085
cg26808747	0.000112572	15.798	3.89291	64.1107
cg15649801	0.000112973	281.763	16.0773	4938.04
cg00107632	0.000113107	6.48968e+33	4.42923e+16	9.50863e+50
cg12890694	0.000113639	29.9002	5.32447	167.908
cg12662091	0.000114417	303.917	16.6488	5547.9
cg09519462	0.000114802	1.84174e+18	9.62798e+08	3.52308e+27
cg21807240	0.000115589	2.24938e+12	1.18166e+06	4.28185e+18
cg19903071	0.000119666	12471	102.1	1.52327e+06
cg07595776	0.000119672	27.5933	5.08986	149.589
cg16610086	0.00012149	81245.2	254.579	2.59282e+07
cg16288993	0.000121965	4.25681e+08	16873	1.07393e+13
cg02776641	0.000124276	1.79561e+21	2.50575e+10	1.28673e+32
cg08009116	0.000125361	1.05829e+09	25873.5	4.3287e+13
cg24896860	0.000127507	5388.22	66.4548	436883
cg09659817	0.000127617	31.6053	5.40102	184.945
cg16811108	0.000127746	21.2002	4.44359	101.145
cg10101074	0.000127934	58.2592	7.27866	466.312
cg26571618	0.000128137	69.9993	7.95955	615.601
cg27274542	0.00012967	28.1059	5.09126	155.156
cg04882870	0.000133291	8.3896e+28	121537738655321	5.79124e+43
cg05724997	0.000136024	17.7421	4.04925	77.7384
cg22676763	0.000136558	7.22603e+32	9431216640206360	5.53646e+49
cg00668694	0.000140573	127.739	10.5188	1551.24
cg12093976	0.00014089	1435.66	34.0041	60613.7
cg21793948	0.000146894	14.1703	3.60526	55.6957
cg19258183	0.000149431	1265875949121500	1.97913e+07	8.09668e+22
cg09048251	0.000150011	17.3568	3.96887	75.9051
cg27068490	0.000155011	15.9119	3.79399	66.7344
cg04478875	0.000156513	79.5748	8.22881	769.509
cg01426208	0.000157098	153.029	11.2673	2078.39
cg23461714	0.000158887	15.3298	3.71789	63.2087
cg10687604	0.000159191	5484.14	62.8687	478391
cg01779903	0.000161104	1.56735e+07	2869.33	8.56149e+10
cg05768558	0.000162148	15.5089	3.73158	64.4566
cg04285443	0.000163947	34.3504	5.46008	216.105
cg27368011	0.000165534	4.70025e+27	1.87308e+13	1.17947e+42
cg25195497	0.000171652	154.847	11.1585	2148.82
cg08039385	0.000178956	31.549	5.18686	191.896
cg25252598	0.000181179	4.29873e+06	1447.9	1.27627e+10
cg05278650	0.000181386	13.6739	3.47695	53.7757
cg12281657	0.000181605	12.3191	3.30798	45.8771
cg03135713	0.000181811	90.4888	8.55192	957.472
cg20697427	0.000182276	1.89594e-05	6.37865e-08	0.00563533
cg16985320	0.000183759	8.06345e+09	51934.8	1251939685622780
cg25958857	0.000185473	344.924	16.1107	7384.68
cg22662233	0.000186302	2.3568e+11	255660	2.17261e+17
cg23821329	0.000187667	22.5906	4.40006	115.984
cg07755390	0.000191988	70.6785	7.54028	662.501
cg26314531	0.000196995	11.4791	3.17613	41.4878
cg11935853	0.000198557	2.20408e+12	694070	6.99923e+18
cg11875119	0.0002053	254070537065936	6.30752e+06	1.02341e+22
cg08196842	0.00021022	14.0648	3.47533	56.9209
cg17790333	0.000211102	0.0270729	0.0040125	0.182665
cg01876194	0.000215769	16.0041	3.68376	69.5296
cg03926852	0.000218151	0.0152766	0.00166453	0.140204
cg11479568	0.000218335	0.000528994	9.68935e-06	0.0288807
cg11495854	0.000224009	3.18373e+11	247484	4.09567e+17
cg13356117	0.00022562	15.8002	3.64519	68.4867
cg04096472	0.00022563	2.15255e+23	8.59598e+10	5.39026e+35
cg09265000	0.000226192	45.5342	5.98383	346.494
cg23522611	0.000226766	22.5322	4.30231	118.006
cg06426416	0.000227562	101.985	8.72194	1192.51
cg08956724	0.000230556	386.595	16.2326	9207.12
cg21604743	0.000234732	3.49175e+07	3340.74	3.64958e+11
cg25570913	0.000235604	11.7809	3.16424	43.8619
cg01631162	0.00024024	51.1416	6.26341	417.578
cg25660386	0.000247433	22.7316	4.27675	120.822
cg08624472	0.000249949	130.393	9.62124	1767.16
cg07507755	0.000250957	26.8273	4.61136	156.073
cg13447539	0.000255722	121.596	9.27566	1594.02
cg24575067	0.000256215	1087.45	25.6207	46156.3
cg23425533	0.00025786	18.2641	3.84549	86.7454
cg25847633	0.000259886	94.9545	8.24726	1093.25
cg18686527	0.000262627	19.6044	3.96568	96.9142
cg07803108	0.000267293	38.4994	5.407	274.126
cg26147351	0.00026756	15.245	3.52303	65.9691
cg22082868	0.000269078	43.8976	5.73967	335.734
cg23265500	0.000270284	11.7214	3.11701	44.0777
cg05173758	0.000272878	77.9646	7.46687	814.06
cg08623535	0.000273776	29.8513	4.79218	185.949
cg08135379	0.000278226	13.024	3.26321	51.9809
cg17659886	0.000281062	1321.86	27.3494	63888.2
cg27052403	0.000283932	17.2946	3.71051	80.6097
cg23634459	0.000283987	36740.1	125.867	1.07243e+07
cg03148658	0.000284687	8033.15	62.4932	1.03262e+06
cg23591869	0.000286575	80.3531	7.50956	859.787
cg04835615	0.000286794	9.40327e+28	2.07213e+13	4.26717e+44
cg06878741	0.000290857	0.00107723	2.67293e-05	0.0434137
cg06939941	0.000292065	100.27	8.28616	1213.35
cg08985336	0.000293997	60.1084	6.54507	552.022
cg04600618	0.000297557	24.9353	4.36518	142.439
cg17930034	0.000297635	13.0443	3.24384	52.4541
cg21034676	0.000297659	67.2346	6.8763	657.401
cg08508814	0.000299244	27.1686	4.53687	162.696
cg03621100	0.000305566	7.21553e+27	5.43906e+12	9.57222e+42
cg17900015	0.000306379	0.0375976	0.00633204	0.223242
cg09430391	0.000307127	3256.12	40.2853	263180
cg18564053	0.000308456	233.437	12.0711	4514.3
cg20711828	0.00030905	22.2256	4.12214	119.835
cg18393747	0.000309745	24.1085	4.27693	135.897
cg11075230	0.00031516	656.139	19.2484	22366.5
cg20237496	0.000315302	4.58413e+89	7.56834e+40	2.7766e+138
cg12158737	0.000315615	14.7336	3.40893	63.6795
cg04816394	0.000315716	14.5385	3.38817	62.3845
cg25114752	0.000317282	0.00673833	0.000443193	0.10245
cg11279838	0.000319753	11.0019	2.98029	40.6138
cg12921375	0.000320963	14.0475	3.3298	59.2624
cg03761471	0.000324232	209.295	11.3644	3854.55
cg15199326	0.00033255	19.3268	3.83435	97.4152
cg22424108	0.000335604	37.4593	5.1707	271.375
cg24882097	0.00034025	324362	313.346	3.35764e+08
cg08467595	0.000340383	16.633	3.57253	77.4397
cg08404509	0.000341258	2.14008e+56	3.20787e+25	1.42772e+87
cg12081743	0.00034259	2.04527e+21	4.42709e+09	9.44893e+32
cg21237418	0.000344617	19.6999	3.85143	100.764
cg13299707	0.000344866	0.00261506	0.000100747	0.0678781
cg20526303	0.000345633	1.24295e+11	104204	1.48261e+17
cg23190093	0.000346592	0.0153303	0.00155437	0.151199
cg20559216	0.000347709	40.2005	5.31116	304.28
cg00358220	0.000347776	14.6433	3.36446	63.7326
cg03335938	0.000352401	211.839	11.2257	3997.57
cg14678829	0.00035431	46.107	5.63438	377.301
cg02530437	0.000354927	19.9056	3.85592	102.76
cg26416971	0.000356525	11.7757	3.04131	45.5948
cg18523979	0.000357678	11.9375	3.05909	46.5834
cg16606638	0.000366242	28.0714	4.48389	175.741
cg20481789	0.000367896	2.28343e+23	3.20679e+10	1.62595e+36
cg09772121	0.000373038	5030.92	46.0062	550146
cg17631196	0.000376107	17.7152	3.63373	86.3654
cg11543725	0.000379747	33.4457	4.8266	231.76
cg14426001	0.000381367	18.6096	3.70881	93.3764
cg03419885	0.000381752	35.5587	4.95725	255.066
cg27478224	0.000385204	123012	190.454	7.94521e+07
cg01799681	0.000385407	42.3675	5.35443	335.237
cg07232612	0.000389257	514434	359.465	7.36211e+08
cg11533712	0.000389558	365.451	14.0188	9526.79
cg15307891	0.000389713	37.139	5.0394	273.705
cg01076971	0.000390578	12.9467	3.14416	53.3108
cg16121136	0.000391558	0.0245738	0.00316791	0.190622
cg24710870	0.000392919	330.317	13.3715	8159.81
cg17769836	0.000396374	0.00709735	0.000459372	0.109655
cg23095743	0.000397308	48.0056	5.63527	408.949
cg24460884	0.000397805	23.308	4.08035	133.141
cg20069020	0.000399806	1.09701e+99	1.61687e+44	7.443e+153
cg19428472	0.000406161	97966.8	167.733	5.72188e+07
cg00737840	0.00040677	46.2485	5.52157	387.376
cg15967304	0.000407695	6.83271e+33	1189703530364320	3.92417e+52
cg00615746	0.00040923	0.00211391	6.9438e-05	0.0643538
cg01481989	0.00041007	16.2961	3.46551	76.6299
cg16574065	0.000410918	118.236	8.37265	1669.69
cg13990947	0.000411443	11.5841	2.97587	45.0933
cg20039407	0.00041231	243.759	11.5459	5146.3
cg14856585	0.000413227	38.3423	5.0669	290.145
cg21461649	0.000413368	19.1889	3.72344	98.8911
cg21209113	0.000416615	67.0613	6.48882	693.071
cg15358633	0.000420287	1.2593e+08	3970.75	3.99382e+12
cg12297619	0.000422044	212116	232.092	1.9386e+08
cg16225168	0.000422873	234782418554959	2.40536e+06	2.29167e+22
cg00880494	0.000423935	3.22009e+08	5983.56	1.73291e+13
cg20623371	0.000425445	23.6172	4.0684	137.099
cg02732583	0.000427339	17.6301	3.57143	87.0296
cg04536575	0.000428593	13.581	3.18004	58.0007
cg14019323	0.000432692	412.136	14.4104	11787.1
cg26630791	0.000435844	10.5393	2.83711	39.1511
cg14481222	0.00043777	15.0133	3.31663	67.9601
cg21864248	0.000438385	14.9476	3.30967	67.5083
cg26246897	0.000442024	11.07	2.89538	42.3247
cg17078393	0.000444809	6.05511e-06	7.4151e-09	0.00494455
cg19638435	0.000445132	12.6338	3.06728	52.037
cg10668096	0.000447115	2.73245e-05	7.74063e-08	0.00964557
cg25432975	0.000447753	9.63797	2.71999	34.1511
cg02694863	0.000447804	4.40804e+12	383824	5.06241e+19
cg27425612	0.000448142	18.5237	3.62937	94.5415
cg22281505	0.000448646	987.46	21.0012	46429.5
cg26013434	0.000449645	22.401	3.94539	127.188
cg24879335	0.000453533	245.523	11.3308	5320.15
cg03980991	0.000455452	24.8	4.11943	149.302
cg12918457	0.000458185	15.0881	3.30659	68.8475
cg21554249	0.00045925	9.48724e+27	2.11698e+12	4.2517e+43
cg19768599	0.000461127	85.3152	7.08607	1027.18
cg25534294	0.000462586	54.1988	5.79961	506.501
cg23103367	0.000467056	3.79951e+18	1.48667e+08	9.71048e+28
cg00060304	0.000467232	18.5731	3.61488	95.4283
cg11323506	0.000467324	12.71	3.05934	52.804
cg02322252	0.000467839	23.1785	3.98409	134.847
cg21740964	0.000468834	132.954	8.58533	2058.96
cg25838645	0.00046979	2244.13	29.7241	169429
cg08081036	0.000473838	123.252	8.28588	1833.38
cg09704223	0.000475588	20.7581	3.78739	113.772
cg01311222	0.000477263	52.4327	5.68551	483.544
cg10150686	0.000479201	23.5697	4.00052	138.865
cg19998675	0.000480152	23.8791	4.02239	141.759
cg08839210	0.000480481	28.7697	4.36452	189.642
cg05133314	0.000482536	174.771	9.62075	3174.92
cg27448433	0.000483347	9.09821	2.63259	31.4433
cg24076778	0.000487335	76.7534	6.69447	879.993
cg05599550	0.000488644	27.9859	4.30155	182.076
cg10267925	0.00049025	33.4162	4.64661	240.313
cg25383699	0.000499359	12.584	3.02404	52.3658
cg03691338	0.000503674	26.5924	4.18837	168.838
cg10096645	0.000508031	59.2891	5.93488	592.295
cg22138627	0.000509755	0.000102214	5.74347e-07	0.0181906
cg00950809	0.000510389	221.339	10.5316	4651.8
cg12604794	0.000515176	43719.8	105.086	1.8189e+07
cg05350188	0.00051572	18.3856	3.5544	95.1022
cg21846808	0.000518306	16.7784	3.41346	82.4717
cg18865399	0.00051922	519.23	15.2028	17733.6
cg01085803	0.000520032	3312.94	34.0419	322414
cg10604168	0.000520217	13.6685	3.12071	59.8674
cg20318096	0.000520512	809.553	18.4317	35557
cg01053621	0.000529376	0.00837457	0.000560069	0.125223
cg24889653	0.000530734	4.42909e+22	6.84812e+09	2.86456e+35
cg07736389	0.000532305	52.8814	5.60052	499.319
cg24186674	0.000534477	21.049	3.75221	118.08
cg11625262	0.000534678	6.94188e+32	178966011104640	2.69267e+51
cg16723488	0.000540311	42.6349	5.08797	357.261
cg07656304	0.000541889	7.09592e+21	2.95227e+09	1.70554e+34
cg10147507	0.000542863	44.5766	5.18307	383.377
cg04747510	0.000544056	42.3104	5.06536	353.414
cg10205753	0.00054486	32.5035	4.51753	233.862
cg27504782	0.00054784	81.6958	6.72696	992.158
cg14042912	0.000547888	4.94555e+10	42622.4	5.73842e+16
cg06033387	0.000549775	20.1396	3.66724	110.602
cg07091355	0.000553958	2.28923e+38	3.86897e+16	1.35452e+60
cg23933618	0.000560962	13.6745	3.09428	60.4315
cg00248804	0.000562467	43.3281	5.08942	368.869
cg06671660	0.000563287	1.46351e-05	2.61696e-08	0.00818454
cg26104816	0.000563686	73.0111	6.3728	836.465
cg22152688	0.000565253	444.244	13.8841	14214.4
cg09893504	0.000568037	40.9147	4.95695	337.711
cg03958863	0.000568897	0.00160936	4.14867e-05	0.0624309
cg24059154	0.000569277	193.937	9.69306	3880.25
cg25623409	0.000570733	33.4683	4.54216	246.607
cg26277730	0.000571877	11.2368	2.83683	44.5095
cg01726775	0.000574524	54.3725	5.59243	528.637
cg00088885	0.000575629	117.741	7.79789	1777.78
cg18953104	0.000578311	16.4131	3.33539	80.7672
cg19724567	0.000579077	26.7778	4.117	174.168
cg16556145	0.000579243	24.2539	3.94509	149.11
cg06460869	0.000580979	39.7632	4.87816	324.12
cg19914919	0.000581438	26.6504	4.1061	172.973
cg07146435	0.000581761	36.1043	4.67868	278.609
cg16264781	0.000585483	2.61425e+70	1.88875e+30	3.61841e+110
cg23398323	0.000587135	3.38247e+109	1.1984e+47	9.54698e+171
cg25036284	0.000587353	17.7669	3.44426	91.6493
cg26489994	0.000587489	501.566	14.4744	17380.2
cg18223359	0.000587694	71219.1	121.778	4.16509e+07
cg17879636	0.000589207	83.6102	6.69783	1043.72
cg04923576	0.000590282	18.4166	3.49556	97.029
cg14654886	0.000591065	105.259	7.38949	1499.35
cg17695462	0.000599059	40.3245	4.88274	333.024
cg11908384	0.000602094	83724	128.942	5.43634e+07
cg10604993	0.000603877	0.00375539	0.000154424	0.091326
cg17306261	0.000606667	10.8829	2.7803	42.5991
cg15976650	0.000608627	77.926	6.45696	940.451
cg12023170	0.000609598	18.1478	3.45895	95.2147
cg07554966	0.000612956	1.92393e+07	1308.54	2.82872e+11
cg15372689	0.000617738	428030	255.641	7.16667e+08
cg04835613	0.000621005	267982	208.633	3.44214e+08
cg16257029	0.000621645	26.0184	4.02412	168.225
cg00912625	0.000624731	0.0527258	0.00976713	0.284629
cg00603371	0.000629006	19.0623	3.51772	103.298
cg03846767	0.000631921	0.0511685	0.00930277	0.281445
cg18880897	0.000634357	151.798	8.5098	2707.76
cg01070078	0.000638358	1052.7	19.3911	57148.9
cg00978822	0.000640245	0.0449629	0.00757627	0.266841
cg02331902	0.00064417	4215.27	34.8973	509167
cg02654987	0.000645136	11.7651	2.8549	48.4842
cg21604450	0.000645141	170.216	8.90021	3255.39
cg07211259	0.000648184	30.8096	4.29721	220.894
cg22325530	0.00064838	15.9252	3.24541	78.1449
cg25134747	0.000653571	0.0313953	0.00429031	0.229741
cg25300386	0.000654663	519.339	14.2472	18931
cg27282530	0.000665566	24.966	3.91412	159.244
cg14621053	0.000667333	17.1622	3.3377	88.2467
cg25968378	0.000667495	194.539	9.34313	4050.64
cg13401368	0.000667591	19.0755	3.4905	104.247
cg19235339	0.000667648	135.527	8.01517	2291.6
cg13629753	0.000670389	216.946	9.77456	4815.12
cg13296563	0.000673405	1.39976e+06	401.135	4.88444e+09
cg06478886	0.00067933	27.3315	4.05458	184.239
cg09983051	0.000679529	20.6117	3.59806	118.075
cg09873933	0.000680512	46.4431	5.0728	425.201
cg13548781	0.000683859	3.17186e+21	1.23583e+09	8.14087e+33
cg22197033	0.000685486	37.2949	4.6175	301.225
cg06299537	0.000686574	89.105	6.67065	1190.24
cg12692722	0.000689393	6.20875	2.16286	17.823
cg12869912	0.000692304	12.1821	2.87398	51.6373
cg11010242	0.000695788	6.0388e+82	8.66337e+34	4.20934e+130
cg10844818	0.000700058	1.49725e+52	1.0131e+22	2.21277e+82
cg04986675	0.000700522	21.6869	3.66031	128.492
cg03552151	0.000700981	20.0971	3.54433	113.955
cg21644096	0.000704094	3.42912e+17	2.46031e+07	4.77945e+27
cg18989977	0.000716567	369.242	12.0224	11340.4
cg26014796	0.000719145	26.4936	3.96674	176.95
cg19510472	0.000719735	0.00191772	5.10576e-05	0.0720297
cg02758599	0.000725057	2.32593e+09	8611.08	628252806224665
cg23833588	0.000725691	12.3613	2.87573	53.1346
cg24399122	0.000726426	278.798	10.6436	7302.82
cg02001779	0.000730834	18.186	3.37881	97.8836
cg25371560	0.000732521	2.17823e+34	256676048349986	1.84851e+54
cg15161047	0.000734077	16.4402	3.23677	83.5026
cg14892538	0.000736338	14.6609	3.0837	69.7029
cg14741153	0.000736432	20.1347	3.52249	115.091
cg17896897	0.000738275	0.0164562	0.00151525	0.17872
cg20800536	0.000739798	87.5736	6.5189	1176.45
cg19714913	0.000740918	80.1334	6.27878	1022.71
cg17227967	0.000742694	14.9374	3.10454	71.871
cg08596000	0.000744135	47.229	5.02696	443.723
cg08774969	0.000745109	13.5531	2.97939	61.6528
cg23271831	0.000745376	24.7345	3.8329	159.617
cg26146617	0.000748237	10.7273	2.70017	42.6178
cg10330371	0.000750714	3632.82	30.8925	427202
cg12002260	0.000751433	15.0677	3.11117	72.9744
cg00646731	0.000752794	0.000245108	1.94618e-06	0.0308696
cg13999188	0.000755122	1.22795e+07	921.789	1.63579e+11
cg01733599	0.00075673	0.00149945	3.40863e-05	0.0659609
cg05970437	0.000758679	12.8716	2.90931	56.9479
cg06356454	0.000761298	0.0141162	0.00118165	0.168635
cg10822582	0.00076451	98.4309	6.79729	1425.37
cg00648919	0.000767334	21.6969	3.61283	130.301
cg07527631	0.000767787	1549.62	21.4581	111907
cg25916307	0.000768472	13.3672	2.95092	60.5508
cg22888181	0.000768695	96451.2	120.27	7.73496e+07
cg00705280	0.000772682	17.3954	3.29137	91.937
cg19349920	0.000773201	0.000241365	1.8793e-06	0.0309994
cg17287630	0.000774007	253152	179.173	3.57677e+08
cg23222406	0.000774168	0.0416862	0.00653809	0.265788
cg14363992	0.00077608	20.3337	3.51054	117.776
cg15739437	0.00077761	0.0204289	0.00211234	0.197574
cg01000408	0.000779586	19070	60.7411	5.98713e+06
cg12989650	0.000779888	0.0252096	0.00294522	0.215782
cg08625289	0.000785034	10.5535	2.66732	41.7563
cg23689127	0.000785145	8.97351e+09	13921.3	5784210219808180
cg06081199	0.000787486	51.0489	5.13849	507.151
cg08210474	0.000788247	12.8804	2.89656	57.2766
cg24249973	0.000791147	0.0198345	0.00200931	0.195792
cg21645554	0.000793371	11.3732	2.74829	47.0657
cg21184172	0.000795101	21.0915	3.55188	125.244
cg13839457	0.000796848	21.7841	3.59873	131.865
cg23923425	0.000797713	1.20596e+09	5940.96	244799834440768
cg10735196	0.000798729	4282752059837260	3.126e+06	5.86754e+24
cg24266670	0.000800709	10.1545	2.61907	39.3707
cg15972243	0.000803959	10.4202	2.6461	41.0338
cg11343072	0.000805541	84.8718	6.31846	1140.03
cg06805542	0.00080673	1.53784e+18	3.53115e+07	6.69741e+28
cg08313132	0.000807945	9.39359e+06	782.26	1.12801e+11
cg04543413	0.000808733	11.0997	2.71455	45.3861
cg27495623	0.000814869	2.71793e+12	142693	5.17692e+19
cg26027780	0.000817668	6016.37	36.8155	983191
cg12093775	0.000822237	10.3775	2.63488	40.8721
cg20288630	0.000823399	180.613	8.5972	3794.39
cg08658621	0.00082518	13.9047	2.9729	65.0341
cg22734086	0.000826598	17.945	3.30317	97.4891
cg10546048	0.000827937	10.0163	2.5945	38.669
cg03946955	0.000831005	25939.1	66.9153	1.0055e+07
cg20633883	0.000831652	983077	300.739	3.21355e+09
cg04994964	0.000832558	49.2721	5.0104	484.54
cg20683765	0.000838781	22.7261	3.63427	142.113
cg05264148	0.000839918	19.5054	3.41124	111.532
cg27605358	0.000840489	0.0923926	0.0228294	0.373921
cg06253058	0.000842368	7.06249	2.24156	22.2518
cg19591950	0.000848515	5.8392e+07	1599.95	2.13109e+12
cg23995605	0.000850576	0.0845301	0.0197957	0.360955
cg24505307	0.000852862	142.035	7.7172	2614.17
cg07053014	0.000853487	35.7513	4.36903	292.548
cg11050612	0.000854283	13.9861	2.96682	65.9328
cg07883622	0.000856185	889816	283.032	2.79747e+09
cg26942275	0.000859135	255.2	9.80667	6641.11
cg17760011	0.000860464	7.61066e+36	1550982751996950	3.73454e+58
cg12276123	0.000865819	14.3888	2.99648	69.0941
cg25784219	0.000868153	118.913	7.1422	1979.84
cg03625911	0.000868859	81.8656	6.1242	1094.34
cg10045446	0.000874726	16.4924	3.1651	85.9374
cg21207418	0.000875366	0.0255771	0.00295206	0.221603
cg07941983	0.000875784	17.055	3.2085	90.6571
cg16844875	0.0008782	8.12373	2.3648	27.9073
cg04837533	0.00088102	16.8342	3.18871	88.8728
cg11015549	0.000886776	41.4167	4.60974	372.113
cg02399645	0.000889202	5.51973e+18	4.88662e+07	6.23487e+29
cg00633473	0.000890605	724.968	14.902	35269.1
cg14540555	0.00089132	48.0966	4.89668	472.419
cg06095560	0.000892128	6.06581e+39	2.06419e+16	1.78249e+63
cg07898899	0.000893437	45.7373	4.79454	436.308
cg15566554	0.00089394	11.5609	2.72785	48.9964
cg09446220	0.000894715	35.3226	4.31148	289.388
cg19489174	0.000894875	12.6909	2.83379	56.8347
cg00855901	0.00089715	2963	26.4711	331657
cg01679328	0.000898708	42.2624	4.63663	385.217
cg10414736	0.000909307	26.1836	3.8035	180.25
cg14064694	0.000911407	42.8175	4.64929	394.326
cg00075204	0.000916134	2.87952e+21	5.91612e+08	1.40153e+34
cg07603922	0.00091676	13944.6	49.4298	3.93388e+06
cg25537962	0.00092008	30.4903	4.0399	230.119
cg07820742	0.000921084	12.8248	2.83561	58.0039
cg15740492	0.000929069	261.046	9.68728	7034.49
cg01302019	0.000933575	5.64343e+07	1449.89	2.19661e+12
cg04264018	0.000939983	119241	117.11	1.21411e+08
cg02576092	0.000943006	79053.1	98.8698	6.32082e+07
cg12483773	0.000945431	72.8818	5.73401	926.36
cg13363525	0.000950352	1.94334e+06	362.289	1.04242e+10
cg25520679	0.000959453	11.3045	2.6798	47.6868
cg17929951	0.000965632	30.5872	4.01171	233.211
cg18725867	0.000969113	13.5793	2.88334	63.9528
cg26718420	0.000972069	0.064355	0.0126078	0.328491
cg20607764	0.000972912	1.43468e+22	9.77744e+08	2.10517e+35
cg18132212	0.000975702	16.5228	3.11937	87.5183
cg16837326	0.000982189	34.3372	4.19186	281.269
cg06208339	0.000984606	16.7367	3.13163	89.4476
cg07291439	0.000985936	30.645	4.00034	234.759
cg02892153	0.000988159	2536.34	23.9107	269043
cg26061177	0.000988804	13.7224	2.88791	65.2039
cg27522060	0.000991378	17.0125	3.14932	91.9005
cg18656763	0.000993837	158.259	7.76305	3226.31
cg05799811	0.000995319	0.0223032	0.00231732	0.214659
cg11283983	0.000997744	7.56431e+06	605.761	9.44576e+10
cg02921003	0.000998015	21.5815	3.46407	134.455
cg23516852	0.00100182	1267404008134260	1.27538e+06	1.25948e+24
cg20023354	0.00100562	4.56414e+07	1244.41	1.67399e+12
cg02105485	0.00101026	1.48374e+08	1994.94	1.10353e+13
cg02841523	0.00101491	15.487	3.02189	79.3702
cg11120913	0.00101793	62.7417	5.31169	741.104
cg05017199	0.00101881	9.66565	2.4972	37.4119
cg26879945	0.00101914	48.7429	4.79616	495.37
cg13793145	0.0010203	17.5581	3.17645	97.0536
cg25032595	0.00102285	9.8122	2.51124	38.3394
cg08845439	0.00102924	33.2137	4.1013	268.976
cg14765969	0.00102981	48.1442	4.76244	486.696
cg10545682	0.00103312	103.385	6.47461	1650.83
cg01678893	0.00103435	1.29848e-36	4.74292e-58	3.5549e-15
cg10962524	0.00103904	18.2181	3.21536	103.223
cg23170771	0.00103909	216.947	8.7126	5402.08
cg00498024	0.00104541	13.7275	2.86689	65.7314
cg11459603	0.00104965	119.063	6.82671	2076.56
cg26611637	0.00106041	1.68696e+06	315.693	9.0146e+09
cg13874046	0.00106046	769.371	14.3996	41107.4
cg00579105	0.00106192	16.9234	3.11148	92.0468
cg25260683	0.00106411	71.3135	5.53913	918.123
cg12088387	0.00106721	11.1689	2.63194	47.3965
cg02427042	0.00106771	2.70154e+17	9.77324e+06	7.46768e+27
cg19769164	0.00107187	3.92407e+24	7.19595e+09	2.13986e+39
cg03267254	0.00107188	16.3763	3.06657	87.4537
cg07882850	0.00107241	27.2141	3.75858	197.045
cg13278100	0.00107308	265.313	9.36037	7520.12
cg13617248	0.00107436	1607.21	19.2574	134137
cg27457941	0.00107621	14.9304	2.95337	75.4788
cg05542338	0.00108007	155.511	7.5437	3205.81
cg21258596	0.00108885	37.9933	4.28403	336.947
cg12307787	0.00109113	10.8539	2.59479	45.4016
cg03762694	0.00109302	10.155	2.52611	40.8233
cg26704078	0.00109345	13.3869	2.821	63.5265
cg20282550	0.00109522	23.6306	3.53954	157.763
cg07121547	0.00109938	2.07998e+41	3.20419e+16	1.3502e+66
cg03625177	0.00110023	65.6359	5.3191	809.926
cg13197705	0.00110237	101468515847600	391977	2.62665e+22
cg20163324	0.00110571	64.6427	5.28109	791.254
cg08974450	0.00110701	17.1812	3.11123	94.8796
cg01710865	0.00110986	59.4607	5.10376	692.739
cg07071609	0.00113273	196624	127.768	3.02588e+08
cg20822858	0.0011426	10.2323	2.52013	41.5454
cg06081371	0.00114609	1.5799e+20	1.059e+08	2.35702e+32
cg23316449	0.00115198	13.3014	2.79396	63.3252
cg22099723	0.00115286	1209.06	16.7377	87337.1
cg25385412	0.00115363	43.2502	4.46078	419.339
cg12847373	0.00115415	6.11064e+24	6.89177e+09	5.41805e+39
cg27091703	0.00115521	233473	135.068	4.03571e+08
cg12341179	0.00115522	2.01059e+17	7.36808e+06	5.48649e+27
cg10947146	0.00115754	256.861	9.03875	7299.44
cg26385222	0.00115836	19.635	3.25832	118.323
cg09536782	0.00115844	4936.88	29.1955	834811
cg23359394	0.00116039	8.64605e+73	2.12161e+29	3.52346e+118
cg15146621	0.00116318	42.3206	4.41527	405.645
cg02248826	0.00116465	15.411	2.95745	80.3054
cg21937554	0.00116749	137.626	7.04068	2690.2
cg17953141	0.00117074	490.149	11.637	20645
cg22172230	0.00117205	81.8244	5.7243	1169.61
cg26351776	0.00117249	50.3582	4.72262	536.979
cg16261619	0.0011743	1.57566e+07	708.431	3.50452e+11
cg13126982	0.00117834	23.4041	3.48345	157.244
cg03192775	0.00118082	13.455	2.7972	64.7213
cg21004899	0.00118111	10.1238	2.49932	41.0074
cg15336765	0.00118505	11.2866	2.60808	48.8435
cg08967456	0.00118546	0.00050879	5.19615e-06	0.049819
cg12430467	0.001188	22.7687	3.44104	150.657
cg05882691	0.00118826	828.035	14.2481	48121.5
cg08975528	0.00118918	0.0016621	3.4683e-05	0.0796524
cg05299387	0.00119149	14.6677	2.89065	74.4265
cg03738959	0.00119419	2.39556e+31	2.5044e+12	2.29146e+50
cg01807377	0.00119708	16.9942	3.06169	94.3284
cg04614823	0.00119808	4.03966e+22	8.47919e+08	1.92458e+36
cg03032532	0.00120467	0.0416263	0.00607589	0.285184
cg25551987	0.00120895	3.58621e+31	2.80074e+12	4.59195e+50
cg26351104	0.0012248	13.4315	2.78113	64.8671
cg06835628	0.00123069	24.1269	3.49972	166.33
cg22738586	0.0012311	1.29963e-05	1.41362e-08	0.0119484
cg01834022	0.00123192	110.155	6.35984	1907.92
cg04719574	0.00123362	33.9461	4.00121	287.998
cg00959636	0.0012357	9.61017	2.43503	37.9279
cg05879418	0.00123665	19.8996	3.24173	122.156
cg12784241	0.00123841	13.5709	2.78815	66.0541
cg27303223	0.00123917	89.8554	5.86173	1377.41
cg01720186	0.00124595	20.6941	3.28801	130.245
cg15510249	0.00124597	17.8144	3.10003	102.37
cg04447621	0.00125112	91.286	5.88452	1416.11
cg20104688	0.00125158	3.46867e+23	1.74614e+09	6.89043e+37
cg06481786	0.00125224	36.7042	4.11412	327.457
cg12992720	0.00126117	11.3949	2.5968	50.0014
cg00513220	0.00126292	26.4176	3.61041	193.3
cg27007426	0.00126423	1.94382e+39	2533822205554940	1.4912e+63
cg00998387	0.00126588	10.3285	2.49746	42.7146
cg23319046	0.00126815	20.0745	3.2397	124.389
cg27567593	0.00126917	26.5666	3.61522	195.226
cg01007894	0.00127046	0.0554209	0.00954061	0.321936
cg16534307	0.00127099	13.371	2.76189	64.7322
cg16261398	0.00127176	7.74966e+08	3036.25	197800384180187
cg24594692	0.00127289	1.80405e-06	5.7851e-10	0.00562581
cg15033552	0.00127354	36.8049	4.10505	329.984
cg13696287	0.00127402	0.0249064	0.00263454	0.235459
cg00688810	0.00127488	0.0277448	0.00313353	0.245657
cg11811705	0.00127593	19.8076	3.21957	121.861
cg15241758	0.00127999	33.3642	3.94645	282.068
cg23964682	0.00128351	64228.4	76.0347	5.42554e+07
cg01663603	0.00128382	10.6395	2.52213	44.8824
cg24855818	0.00128395	0.0301349	0.00357414	0.254078
cg17514757	0.00128632	25.8427	3.56785	187.185
cg05058040	0.00128642	2656776692236660	1.07857e+06	6.54429e+24
cg00386408	0.00128709	22.5261	3.38089	150.087
cg15833873	0.00128836	1.13491e+11	21036.2	6.12287e+17
cg23218979	0.00129255	1.48407e+06	258.355	8.52498e+09
cg03228353	0.00129506	0.0148078	0.00113732	0.192796
cg16190688	0.00130154	0.0559635	0.00965472	0.324391
cg21389901	0.00130265	63.2896	5.05033	793.132
cg16225405	0.00131051	18.5142	3.1223	109.783
cg17298181	0.00131069	19.0866	3.15954	115.301
cg12173498	0.00131102	30.076	3.77265	239.769
cg10117734	0.00131369	3265910622327780	1.12258e+06	9.50149e+24
cg08244262	0.00131418	18.2637	3.10437	107.449
cg21868134	0.00131904	8.01931	2.25112	28.5677
cg20749059	0.00132182	16.0157	2.94679	87.045
cg27636740	0.00132271	50.7261	4.61717	557.297
cg16800461	0.00132434	4.82769e+36	194942111585392	1.19556e+59
cg02113971	0.0013296	2.12588e+19	3.34752e+07	1.35007e+31
cg09551147	0.0013307	50.623	4.60756	556.192
cg23186534	0.00133284	0.00733431	0.00036434	0.147643
cg22331862	0.00133304	19.1353	3.15407	116.091
cg02554345	0.00133334	9.54536	2.40607	37.8683
cg12899421	0.0013343	43.8696	4.35533	441.882
cg14665413	0.00133536	284.029	9.00699	8956.68
cg21728447	0.00133771	7787493538442620	1.51935e+06	3.99152e+25
cg21915666	0.00134254	30.7645	3.78921	249.777
cg13210403	0.00134451	13.269	2.7319	64.448
cg07896735	0.00134504	1.48765e+19	2.83298e+07	7.81194e+30
cg23913350	0.00134994	78.7841	5.45452	1137.94
cg01692815	0.0013504	3435	23.6386	499151
cg18151987	0.00135054	1705.92	18.0102	161584
cg16539981	0.00135149	3.62095e+28	1.23923e+11	1.05802e+46
cg19747632	0.00135168	21.2573	3.2782	137.841
cg11688469	0.00135365	2.2279e-05	3.17985e-08	0.0156093
cg02585702	0.00135659	13.0514	2.71098	62.8335
cg16832551	0.0013578	9.18759	2.36533	35.6872
cg10748765	0.00135803	487.212	11.0479	21486
cg04994773	0.00135889	2.96656e+45	4.45867e+17	1.97378e+73
cg19494946	0.00136001	69.96	5.19949	941.322
cg14318946	0.00136764	25.4874	3.51029	185.059
cg00231140	0.00136909	23.6959	3.41183	164.573
cg15925179	0.00137055	8.98138e+06	496.065	1.6261e+11
cg08424930	0.00137196	534.275	11.4102	25017.1
cg06092948	0.00137244	406360	149.255	1.10635e+09
cg23864632	0.00137259	8.24122e+08	2855.29	237865750009258
cg04797936	0.0013749	14.2333	2.79827	72.3967
cg02661879	0.00137852	17.4765	3.02868	100.845
cg13690989	0.00137871	5.57398e+18	1.82398e+07	1.70338e+30
cg09029902	0.00138019	106.171	6.09003	1850.93
cg02927098	0.0013804	9.49581e+30	9.9206e+11	9.08921e+49
cg18998670	0.00138106	18.7414	3.11085	112.908
cg08581076	0.00138244	3.84802e+55	3.32457e+21	4.45389e+89
cg26332194	0.00138309	2.28914e+46	8.8825e+17	5.8994e+74
cg02192855	0.00138535	27.3503	3.59917	207.836
cg10273135	0.00138689	14.405	2.80771	73.9048
cg26399201	0.00138789	15.5376	2.89085	83.5106
cg20888386	0.00139035	251.925	8.49134	7474.21
cg01258201	0.00139804	24.3128	3.43331	172.17
cg24617346	0.00139914	76631	77.2536	7.60135e+07
cg15264246	0.00139989	402375236176612	441111	3.67041e+23
cg23679992	0.00140338	0.0351625	0.00450696	0.274331
cg02703843	0.00140342	2061.35	19.0732	222781
cg08160057	0.00140901	60.5102	4.87548	751
cg09361488	0.00141338	83.4454	5.51544	1262.48
cg11988591	0.00141351	13.0727	2.69689	63.3673
cg25050951	0.00141364	13.5684	2.73588	67.2919
cg17940889	0.00141484	830.576	13.3841	51542.9
cg04640677	0.00141863	20.9941	3.23595	136.205
cg17475456	0.00142127	5.27139e+08	2309.91	120297112452984
cg11631518	0.00142306	188.274	7.53545	4704.03
cg06635624	0.00142612	149657	98.8065	2.26678e+08
cg18697156	0.00143309	3.21902e+21	1.92528e+08	5.38214e+34
cg01562385	0.00143436	26.0251	3.5085	193.047
cg20564913	0.00143594	8.09455	2.23729	29.2862
cg02298193	0.00143622	1.72739e+08	1485.71	2.00839e+13
cg09525490	0.00143811	3.60938e+21	1.99268e+08	6.53774e+34
cg01419788	0.00143904	1.14101e+10	7440.66	1.74973e+16
cg05296643	0.00145058	268.375	8.58765	8387.08
cg12568776	0.00146201	2.5847e+08	1701.97	3.92526e+13
cg20383064	0.00146478	1.85367e+20	6.05608e+07	5.67382e+32
cg09480054	0.00146797	18.7411	3.08001	114.035
cg00740813	0.00147259	41.4421	4.17403	411.459
cg18458431	0.00147295	1706.93	17.3798	167644
cg12049787	0.00147453	46603.7	61.7682	3.51623e+07
cg02110333	0.00147454	51421.8	64.1436	4.12232e+07
cg11034626	0.0014781	127.077	6.40938	2519.54
cg26504906	0.00148116	0.045985	0.006885	0.307134
cg09579413	0.00148294	180670	103.47	3.15468e+08
cg15225378	0.00148318	3.19839e+24	2.46499e+09	4.14999e+39
cg17701886	0.00148459	14.331	2.77393	74.0386
cg17948565	0.00148625	9.58254e-05	3.18156e-07	0.0288616
cg25468802	0.00148968	4.90331e-05	1.07545e-07	0.0223556
cg02236650	0.0014897	8.31748	2.25098	30.7335
cg16929739	0.00149008	20.756	3.19497	134.84
cg23259851	0.00149367	35.5208	3.92307	321.617
cg21648401	0.0014963	43504.6	59.6314	3.17392e+07
cg08453036	0.00150108	19.6606	3.12545	123.674
cg20559189	0.00150302	1.7258e+12	47952.7	6.2111e+19
cg26954625	0.00150432	52.791	4.55846	611.366
cg12392473	0.00150718	8.46246	2.26274	31.6489
cg24506221	0.00150928	9.10414	2.32647	35.6272
cg05929675	0.00151051	12.4708	2.62353	59.2791
cg17818837	0.00151065	33614.5	53.7231	2.10326e+07
cg10165585	0.0015149	14.5303	2.78015	75.9419
cg00962781	0.00151543	10.9465	2.4949	48.0285
cg13488201	0.00151643	12.914	2.65728	62.7601
cg16479173	0.00151696	900.901	13.4481	60352.1
cg19894580	0.00151697	46.0556	4.31876	491.14
cg17133183	0.00151931	27.9031	3.56533	218.376
cg26714305	0.00152031	38.8511	4.0452	373.135
cg13025668	0.0015271	20.3468	3.15748	131.115
cg13526040	0.00152749	18.1762	3.02431	109.239
cg15630907	0.00152778	41.5	4.14409	415.592
cg07318155	0.00152822	136.53	6.52747	2855.7
cg00359181	0.00153616	69.3432	5.03426	955.151
cg25262361	0.00154023	11.2148	2.51249	50.0582
cg06579271	0.00154235	46.1155	4.30535	493.952
cg20198108	0.00154266	47.916	4.36845	525.574
cg18498537	0.0015536	149026228723749	248232	8.94678e+22
cg16371752	0.00155372	200827	104.333	3.86564e+08
cg13483603	0.00155443	2.14222e+06	256.782	1.78715e+10
cg08872550	0.00155815	40.2561	4.07934	397.259
cg05339066	0.00156296	16.4289	2.89927	93.0952
cg06128448	0.00156299	25.8485	3.4446	193.968
cg23882862	0.00156479	15.3522	2.82497	83.431
cg09541248	0.00156661	0.0574897	0.00978895	0.337633
cg05237641	0.00156886	11.5634	2.53546	52.7368
cg10757027	0.00156911	4.41365e+42	1.61437e+16	1.20669e+69
cg01244651	0.00156918	0.0438739	0.00631634	0.304752
cg23309969	0.00157232	0.0513751	0.00815379	0.323703
cg25549141	0.00157786	32.0185	3.72974	274.867
cg04686412	0.0015812	2.3734e+24	1.79328e+09	3.14119e+39
cg16016176	0.00158498	19.764	3.10297	125.885
cg13016115	0.00158837	4.20355e+21	1.59733e+08	1.10621e+35
cg19686152	0.00159071	0.014361	0.00103116	0.200006
cg02938429	0.00159279	947.917	13.4533	66790
cg03327307	0.00159773	43.9499	4.19507	460.443
cg21403089	0.00159822	1442669505946580	556664	3.73887e+24
cg15540144	0.00159885	533.031	10.8001	26307.4
cg03316107	0.00159957	6.35026e+52	1.02477e+20	3.9351e+85
cg07609788	0.00160943	24.1847	3.34065	175.085
cg06864853	0.00161237	8.05753e+06	411.221	1.5788e+11
cg06352730	0.00161574	10.3038	2.41718	43.9221
cg18943383	0.00161882	240.511	7.95682	7269.95
cg19764541	0.00162198	0.000209937	1.08405e-06	0.0406562
cg09077752	0.00162757	18.2896	2.99969	111.514
cg05759424	0.00162797	2.19517e+09	3393.67	1419925462321510
cg04222920	0.00163053	1.43561e+10	6886.53	2.99277e+16
cg06755413	0.00164267	17.7314	2.96021	106.209
cg14122696	0.00164459	2784.85	19.951	388722
cg24608385	0.00164504	1.81089e+24	1.42502e+09	2.30126e+39
cg01773217	0.00164844	11.4828	2.51123	52.5058
cg10605137	0.00164938	0.00295524	7.85748e-05	0.111148
cg01799653	0.00165101	33.827	3.77358	303.23
cg21699044	0.00165907	12.5642	2.59551	60.8196
cg13213923	0.00165982	9.78478	2.36198	40.5346
cg15952963	0.00166814	27.8637	3.50046	221.796
cg03209557	0.00166878	169.57	6.90882	4161.93
cg21634842	0.00167258	312170	116.962	8.33177e+08
cg11781976	0.00168023	1615.26	16.0956	162099
cg07347511	0.00168368	2379.6	18.6034	304379
cg19006429	0.00168467	16.1492	2.84599	91.6368
cg01409887	0.00168622	10.3902	2.41084	44.7792
cg15168816	0.00168749	16.8328	2.8899	98.0462
cg11520866	0.00168803	0.00104079	1.43144e-05	0.0756751
cg11725009	0.00168834	5666.92	25.7445	1.24741e+06
cg27434509	0.00168925	55.5431	4.52542	681.713
cg10775273	0.00168938	30.0238	3.59127	251.006
cg12229172	0.00168966	25.725	3.38854	195.298
cg08954353	0.00169146	17.1013	2.90602	100.638
cg19526130	0.00169239	8.69263	2.25344	33.5318
cg21208029	0.00169813	4176.77	22.8908	762112
cg19973884	0.00170818	128.494	6.18273	2670.44
cg11632906	0.00170838	15.3961	2.78912	84.9869
cg22369787	0.00170992	19.0633	3.02141	120.278
cg14280424	0.00171238	308622	114.461	8.32144e+08
cg05611617	0.00171349	1.02991e+28	3.19417e+10	3.32079e+45
cg00282347	0.00171986	17.1216	2.89929	101.11
cg14683738	0.00172022	789023	162.168	3.83897e+09
cg11756518	0.00172605	85338.5	70.3064	1.03585e+08
cg04707706	0.00172787	0.0420264	0.00578801	0.305152
cg09494609	0.00172961	54.652	4.47325	667.713
cg26260350	0.00173251	672.174	11.4402	39493.8
cg19353425	0.00173498	14.6374	2.73011	78.4784
cg17724054	0.00173518	7.12246e+16	2.02796e+06	2.5015e+27
cg10385089	0.00174172	32.2705	3.6672	283.973
cg09893305	0.00174755	21.4583	3.14623	146.352
cg19113375	0.0017478	9.16733	2.28933	36.7095
cg09947881	0.00175166	7.15453e+31	8.01342e+11	6.3877e+51
cg00973286	0.0017557	66.4193	4.79436	920.148
cg23050437	0.00175613	41.8496	4.03433	434.122
cg12020983	0.00175798	2.5273e+22	2.32787e+08	2.74381e+36
cg03954573	0.00175984	161.856	6.68236	3920.39
cg07722358	0.00176156	13.3899	2.63448	68.0548
cg13936856	0.00176418	7.66764e-16	2.57915e-25	2.27954e-06
cg12280050	0.00176432	9.80487e+73	4.15611e+27	2.31311e+120
cg23096644	0.00176467	300.922	8.41589	10759.9
cg24920358	0.00176768	35.4583	3.78693	332.007
cg14892066	0.00177547	595.231	10.8311	32711.3
cg02327997	0.00178001	14.7623	2.72771	79.8935
cg23674344	0.00178037	12.8119	2.58729	63.4427
cg19987611	0.00178739	20.2595	3.06705	133.824
cg03736928	0.00178834	25734.2	43.9325	1.50742e+07
cg11915388	0.00179808	17.3656	2.89301	104.239
cg04092231	0.00180198	7970.62	28.2772	2.24672e+06
cg11461950	0.00180466	1.80142e+68	2.43498e+25	1.3327e+111
cg13247580	0.00181633	14.1294	2.67503	74.6308
cg20200605	0.00181824	35.9088	3.78215	340.929
cg16215983	0.00182112	0.000141609	5.39068e-07	0.0371996
cg17982478	0.00182213	193.961	7.07242	5319.37
cg21655830	0.00182439	64.4923	4.69729	885.46
cg12595281	0.00182598	8.78796	2.24081	34.4645
cg06620092	0.0018386	24.1843	3.25874	179.48
cg19086540	0.00183989	36.4196	3.79243	349.745
cg27043726	0.0018528	18.8291	2.96589	119.538
cg15204354	0.00185355	0.0170296	0.00131059	0.221279
cg04133380	0.00185377	2.60611e+07	557.705	1.21782e+12
cg19570723	0.00185388	1.16199e+19	1.14936e+07	1.17475e+31
cg00735923	0.00185577	14.6601	2.70263	79.5222
cg27102995	0.00186107	0.0237504	0.00225168	0.250516
cg01238865	0.00186558	0.0223158	0.00203313	0.24494
cg19510127	0.00187011	52.8817	4.33808	644.635
cg24814117	0.00187126	11.1947	2.44286	51.3014
cg16257983	0.00187257	18.9237	2.96586	120.743
cg10951120	0.00187855	12.9441	2.57606	65.0408
cg08664617	0.00187899	6.88337e+28	4.53261e+10	1.04533e+47
cg20312364	0.0018797	1.17757e+21	6.10697e+07	2.27062e+34
cg04197086	0.0018809	7.34078	2.08864	25.8001
cg18027174	0.00188253	14.8724	2.71078	81.5957
cg20173065	0.00188333	326169	108.794	9.7787e+08
cg11131532	0.00188658	10.1812	2.35595	43.9979
cg03389525	0.00188704	24.9346	3.27943	189.586
cg01025836	0.00188712	15.6232	2.75945	88.4546
cg03761649	0.00188928	2.83604e+28	3.19692e+10	2.51591e+46
cg17102112	0.00188942	0.0276542	0.00287619	0.265892
cg02866152	0.00189018	0.034787	0.0041812	0.289423
cg09744397	0.00189044	0.0242376	0.00231934	0.253287
cg15191465	0.00189235	1.4505e-30	2.17013e-49	9.69503e-12
cg27077143	0.00189363	1925.4	16.3001	227432
cg08983960	0.00189435	1.87852e+17	2.36978e+06	1.4891e+28
cg05700681	0.00189687	0.0234128	0.00219034	0.250262
cg18296956	0.00190391	1718.27	15.5918	189359
cg09315391	0.00190912	12.2479	2.51785	59.5793
cg26468336	0.00191282	28.3957	3.4313	234.989
cg04661128	0.00191805	469.917	9.64008	22906.7
cg04581018	0.0019206	70.1755	4.78393	1029.4
cg20613151	0.00192321	19.3596	2.97676	125.907
cg00801577	0.00192963	206483	90.2595	4.72362e+08
cg05207465	0.00193796	109.705	5.62503	2139.58
cg01003595	0.00193876	132.619	6.0306	2916.44
cg14784868	0.00194032	351444	109.301	1.13003e+09
cg10122474	0.00194059	30.6381	3.51826	266.805
cg17962527	0.00194281	4.74967e-05	8.75436e-08	0.0257693
cg01905633	0.00194313	55.0839	4.36353	695.362
cg12955127	0.00194387	0.0497659	0.00745967	0.332005
cg19960880	0.0019462	26.5072	3.33396	210.75
cg26685501	0.00195079	179.373	6.72564	4783.86
cg18624581	0.00195311	4.92125e+13	106582	2.2723e+22
cg01143804	0.00195337	16.2324	2.78252	94.6953
cg18487516	0.0019538	98.7261	5.3989	1805.34
cg12091642	0.00195383	12.7047	2.543	63.4717
cg01704400	0.00195387	194.876	6.93007	5479.98
cg17753212	0.00195447	6.16346	1.94979	19.4832
cg02685990	0.00196019	6.60491e+09	4014.84	1.08659e+16
cg13152819	0.00196134	8.63524e+27	1.78233e+10	4.18371e+45
cg00978584	0.0019643	27.0384	3.35214	218.092
cg07397399	0.00197006	10.3193	2.3533	45.2503
cg14789272	0.00197215	69.1911	4.72691	1012.8
cg07154408	0.00197276	11959.6	31.2499	4.57707e+06
cg08712722	0.00197312	2.8397e+07	539.771	1.49395e+12
cg02938205	0.00197458	11.8948	2.4783	57.09
cg26721877	0.00197543	9.65526	2.29574	40.6074
cg03758514	0.0019769	435.599	9.27098	20466.7
cg13582001	0.00198176	50.1763	4.19676	599.905
cg07993547	0.00198176	1.92592e+21	6.26377e+07	5.92161e+34
cg08285151	0.00198226	374409	110.028	1.27406e+09
cg03819900	0.00198249	21.6817	3.08602	152.331
cg06619299	0.00198268	0.0477837	0.00695534	0.328277
cg12873692	0.00198783	2.27731e+11	14396.5	3.60235e+18
cg08093216	0.00199087	5.13192e+99	3.14287e+36	8.37979e+162
cg16472060	0.00199318	18.2214	2.89285	114.772
cg24836583	0.00199334	1.98986e+65	7.88221e+23	5.02341e+106
cg09994724	0.00199354	2.7497e+09	2846.6	2656104275895210
cg00873351	0.00199356	0.0290534	0.0030817	0.273908
cg09701145	0.0019998	1750.84	15.3551	199637
cg26990733	0.00200112	1570939098971060	361038	6.83543e+24
cg24310500	0.00200148	50.4309	4.19463	606.317
cg25468058	0.00200627	5.78806e-05	1.18613e-07	0.0282445
cg21135273	0.0020082	165.209	6.46701	4220.5
cg14443953	0.00201088	12.9255	2.54771	65.5763
cg14869141	0.00201236	54.9385	4.3223	698.295
cg19923751	0.0020133	7.05052e+20	4.13915e+07	1.20097e+34
cg05800761	0.00201346	0.0483311	0.00706586	0.330588
cg19568591	0.0020169	19.7447	2.97271	131.144
cg22799850	0.00201867	313.568	8.15887	12051.3
cg20103938	0.00201911	1.06437e+06	158.834	7.13257e+09
cg06749854	0.00201942	171.338	6.54223	4487.25
cg11620984	0.00202086	36.0645	3.70275	351.267
cg02935154	0.00202282	12.1009	2.48482	58.93
cg10631074	0.00202647	723.367	11.0543	47335.5
cg10026473	0.00203523	80.3952	4.95239	1305.1
cg00684824	0.00203592	17.4016	2.83401	106.85
cg20095680	0.00203626	1.81774e+25	1.62581e+09	2.03234e+41
cg02010752	0.00203869	28.3926	3.387	238.01
cg03452174	0.00203928	7.58805	2.09347	27.5039
cg04804539	0.00204146	12.7881	2.53182	64.5924
cg09232440	0.0020426	15.1334	2.69183	85.0801
cg13079949	0.00204569	11.2681	2.41695	52.5336
cg19549288	0.00204982	9.02647e+06	341.625	2.38499e+11
cg04289575	0.00205072	0.0637158	0.0110666	0.366842
cg14018731	0.00205478	8.36479	2.16704	32.2881
cg01033865	0.00205655	53.9852	4.27202	682.208
cg25290355	0.00205788	60.1089	4.44171	813.442
cg14120129	0.00205788	30.8838	3.48559	273.644
cg05966988	0.00206343	1255.68	13.4124	117557
cg23169269	0.00206379	0.00770157	0.00034841	0.170242
cg27355501	0.00206636	0.0665096	0.0118564	0.373093
cg07472806	0.00206729	0.0332826	0.00381897	0.29006
cg07074473	0.00206862	298438542306117	183803	4.84572e+23
cg09692492	0.00206953	43.4841	3.94274	479.581
cg15582789	0.00206972	14.2236	2.62603	77.0403
cg04284814	0.00207003	1.35884e+24	5.96982e+08	3.09295e+39
cg15939915	0.00207256	1.51268e+30	9.38686e+10	2.43767e+49
cg08928933	0.0020726	0.0183127	0.00143587	0.233554
cg23882658	0.0020729	15.8096	2.72823	91.6131
cg00300750	0.00207402	276.239	7.71752	9887.63
cg08885647	0.00207613	10.7671	2.3721	48.8722
cg09144424	0.00207659	101.603	5.36309	1924.86
cg05894910	0.00207851	507.571	9.61979	26781
cg15120454	0.00208372	61.6286	4.4681	850.045
cg02838178	0.00208521	96.9498	5.26634	1784.78
cg09099062	0.00209047	946190099037513	273470	3.27377e+24
cg19111999	0.00209152	14.9565	2.66978	83.788
cg04267807	0.00209591	8.91338	2.21183	35.9196
cg12978275	0.0020977	0.0292988	0.00309008	0.277798
cg04424621	0.00210209	24.2503	3.1786	185.011
cg11656547	0.00210709	33.3985	3.56805	312.624
cg24189904	0.00211065	0.0490133	0.00716674	0.335202
cg20234121	0.00211125	44559.1	48.408	4.10163e+07
cg25316853	0.00211392	8.42819e+12	48269.2	1.47163e+21
cg17954165	0.00211467	361007260988698	188205	6.9247e+23
cg16896371	0.00211495	1.5793e+11	11414.5	2.18513e+18
cg23684074	0.00211616	15.4058	2.69329	88.1225
cg23962250	0.00211658	7.38568e+09	3758.96	1.45115e+16
cg02968741	0.00211932	16.7794	2.7772	101.378
cg11856810	0.00212098	17.4459	2.81627	108.072
cg20773651	0.00212227	31.8707	3.5026	289.996
cg13785221	0.00212452	15.8814	2.72128	92.6839
cg10045354	0.00212567	24.1965	3.16907	184.745
cg14189304	0.00212663	14.5719	2.63737	80.512
cg24744104	0.0021278	89.593	5.08885	1577.35
cg07270153	0.00213093	19.2036	2.9134	126.58
cg06919490	0.00213097	1.43739e+16	702583	2.94071e+26
cg04812189	0.00213165	13.941	2.59445	74.9102
cg19716462	0.00214026	7.29992e+33	1.75576e+12	3.03509e+55
cg10057436	0.0021415	9.34002e-05	2.4981e-07	0.0349208
cg23665381	0.00214262	5.99463e+08	1490.4	241113372986559
cg12073537	0.00214475	15.492	2.69259	89.1346
cg00360414	0.00214881	15.8085	2.71146	92.1677
cg06552618	0.00214984	1.50078e+27	6.59177e+09	3.41688e+44
cg02906238	0.00215186	2.61869e+06	208.222	3.29339e+10
cg09252999	0.00215504	10.6485	2.3497	48.2574
cg18878432	0.00215562	0.0563468	0.00897118	0.353907
cg20434825	0.00215653	15.5199	2.69182	89.4807
cg15289427	0.00215713	30.556	3.43766	271.6
cg22812770	0.00216034	11.0615	2.38134	51.3817
cg22211866	0.00216105	3.39517e+16	927621	1.24266e+27
cg26281655	0.00216404	5.77552e-26	4.28215e-42	7.78969e-10
cg05264454	0.0021647	4.10014e+83	1.49298e+30	1.12601e+137
cg00534274	0.0021715	15.7369	2.70214	91.6494
cg10333802	0.00217349	28.4994	3.34697	242.672
cg09459982	0.00217846	0.00183727	3.27014e-05	0.103224
cg12117827	0.00218103	362.512	8.36382	15712.3
cg03143886	0.00218354	41.0936	3.81508	442.634
cg07263178	0.00218431	2.78181e+11	13291.5	5.82212e+18
cg03449543	0.00218741	0.013767	0.000887395	0.213579
cg22150459	0.0021888	1.80796e+36	1.14653e+13	2.85097e+59
cg02427443	0.0021945	366.126	8.37474	16006.3
cg27561818	0.00219452	0.0975268	0.0219881	0.432574
cg08928646	0.0022023	2.16606e+17	1.72753e+06	2.7159e+28
cg02468250	0.0022104	20.9489	2.98575	146.983
cg06370862	0.00221405	31.3581	3.45058	284.976
cg12013321	0.00222238	11.7086	2.42015	56.6455
cg15511381	0.00222534	10.0763	2.29264	44.2859
cg22712893	0.00222667	1.95962e+07	415.637	9.23907e+11
cg14530834	0.00222717	10.8295	2.35249	49.8531
cg11145633	0.00222817	1.37301e+82	3.11338e+29	6.05501e+134
cg04611395	0.00222857	12.8727	2.50286	66.2063
cg04620091	0.00222927	198.276	6.68053	5884.74
cg27174438	0.00222945	3337.29	18.4086	605018
cg24936095	0.00223603	65.3529	4.48133	953.066
cg24105933	0.0022372	0.00156943	2.49861e-05	0.0985793
cg14256699	0.00224255	0.0136407	0.000868254	0.214304
cg08729178	0.00224365	12.6366	2.48361	64.2951
cg13501359	0.00224604	27.1695	3.2675	225.916
cg01597632	0.00224697	1.2586e+09	1831.03	865128397686413
cg19786920	0.00224698	9.46413	2.23855	40.0124
cg04982619	0.00224704	4.72253e+21	5.90292e+07	3.77818e+35
cg22876739	0.00224856	88.8693	4.99601	1580.81
cg19009280	0.00225337	19.4692	2.89771	130.81
cg16523704	0.00225395	13.7892	2.56065	74.2552
cg20245751	0.00225548	0.0087306	0.000416698	0.182923
cg22297710	0.00226055	1.49675e+11	10058.2	2.2273e+18
cg01800614	0.0022633	0.00522924	0.000179421	0.152407
cg19748341	0.00226446	36.4101	3.62244	365.968
cg18457249	0.00226609	16.3436	2.71887	98.2438
cg10232580	0.00226617	50.5528	4.07335	627.393
cg01485247	0.00226638	1.38976e+63	4.02888e+22	4.79398e+103
cg26400885	0.00226641	18.8645	2.86207	124.339
cg04524477	0.00226648	24.2046	3.12919	187.225
cg08184652	0.00227644	12.6352	2.47776	64.4329
cg03848381	0.00228575	10.7639	2.33824	49.5504
cg05462426	0.00228576	84.3739	4.88143	1458.38
cg23455517	0.00228962	10.5676	2.32233	48.0871
cg15460816	0.00229099	0.0256689	0.00243872	0.27018
cg13733410	0.00229523	16.0791	2.69698	95.8621
cg02751123	0.00229624	1.55541e+56	1.17543e+20	2.05824e+92
cg21240855	0.00230118	0.0176618	0.00131808	0.236661
cg21282131	0.00230199	14.0159	2.56661	76.5385
cg00186414	0.00230262	2.92541e+22	1.048e+08	8.16603e+36
cg14107807	0.00230355	31.3655	3.42129	287.55
cg18641478	0.00230527	4.71923e+127	3.71412e+45	5.99634e+209
cg13726682	0.00230709	40.5445	3.74825	438.565
cg04193415	0.00230872	25.1028	3.15836	199.518
cg22920501	0.00230993	14.1627	2.57469	77.9056
cg07891473	0.00232028	13.8108	2.54977	74.8055
cg22129549	0.0023221	70.0962	4.54905	1080.11
cg13094752	0.00232664	82.8519	4.82574	1422.46
cg26748440	0.0023289	17.4513	2.76971	109.957
cg24605090	0.00232992	71.0899	4.56777	1106.4
cg11802027	0.00233347	55.5539	4.18199	737.983
cg01851208	0.00233846	60.5026	4.30863	849.589
cg15118665	0.00234398	14.0286	2.55966	76.8858
cg01928078	0.0023457	14.524	2.59115	81.4102
cg16463745	0.00234622	8.55316e+08	1506.93	485468698955529
cg16654152	0.00235488	12.0769	2.425	60.1454
cg13755873	0.00235614	12.4695	2.45252	63.3993
cg24555656	0.00235698	6.23697e+17	2.12005e+06	1.83486e+29
cg16132520	0.00235943	5.74286e+16	905686	3.64149e+27
cg23497217	0.00236401	7.74553e+11	16766.8	3.5781e+19
cg01356653	0.00236822	6.06937e+16	915225	4.02493e+27
cg05165025	0.00236881	44.2363	3.84211	509.316
cg21367972	0.00237007	43.6288	3.82279	497.927
cg24759821	0.00237097	25.8725	3.17504	210.828
cg18068537	0.00237185	0.0146925	0.000966217	0.223416
cg27445347	0.00237668	200.01	6.55888	6099.18
cg19815376	0.00237681	30.5874	3.36771	277.812
cg02393097	0.0023878	4.8163e+06	234.553	9.88976e+10
cg24426691	0.00238878	15.9167	2.66836	94.9428
cg12396523	0.00238909	8.909e+61	9.34067e+21	8.49728e+101
cg18086187	0.00239087	6.69211	1.96221	22.8234
cg07175507	0.00239458	12.4891	2.4475	63.73
cg23912429	0.00239487	161.897	6.0696	4318.35
cg09701880	0.00240036	11.5326	2.37843	55.92
cg08675743	0.00240156	16.1354	2.67876	97.1914
cg07532089	0.0024043	4.6265e-11	9.80614e-18	0.000218277
cg22611163	0.00240458	16.6716	2.70935	102.587
cg17874478	0.00240597	132.572	5.64632	3112.73
cg24538947	0.00241118	19.7427	2.87507	135.57
cg13891121	0.00241799	13.1221	2.48676	69.2421
cg05578358	0.0024284	47.9571	3.92961	585.27
cg22259293	0.00242911	20.6792	2.91842	146.528
cg02473594	0.00243045	1.62684e+12	20762	1.27473e+20
cg19042435	0.00243255	10.7845	2.31785	50.1781
cg22547404	0.00243297	1.04293e+83	2.21424e+29	4.91232e+136
cg21192313	0.00243721	1.07915e+19	5.31698e+06	2.19026e+31
cg17135058	0.00244627	1.39637e+10	3823.68	5.09943e+16
cg15032755	0.00244628	0.00452035	0.000137521	0.148586
cg22245858	0.00244951	0.00319083	7.74524e-05	0.131453
cg15148757	0.00245074	16.8353	2.70937	104.61
cg00782174	0.0024531	4.01571e+25	1.08842e+09	1.48159e+42
cg08596817	0.00245375	5.64355e+07	544.205	5.85251e+12
cg05563388	0.00245391	42654.1	43.0563	4.22557e+07
cg19021197	0.0024548	28.6325	3.26686	250.95
cg06302118	0.00245942	83.3923	4.76144	1460.54
cg01800148	0.00246245	0.103088	0.0236843	0.4487
cg25372335	0.00246765	95.2782	4.9857	1820.8
cg20308679	0.00247727	12.4698	2.43269	63.9195
cg19863760	0.00247844	8.90839e+25	1.38579e+09	5.72665e+42
cg08495020	0.00247886	0.00324672	7.93486e-05	0.132846
cg23348764	0.00248266	17.7893	2.75596	114.828
cg15827086	0.00248518	84811.2	54.3686	1.323e+08
cg03100040	0.00248605	8.08929e+17	2.0189e+06	3.24121e+29
cg00913954	0.00248606	10.8455	2.3147	50.8161
cg19970425	0.00249228	137.498	5.65609	3342.54
cg12082025	0.00249235	0.00927866	0.000446947	0.192626
cg05593349	0.00249451	34.8383	3.48816	347.95
cg15410276	0.00250134	531.737	9.09064	31102.8
cg26429629	0.00250181	63.3705	4.30209	933.458
cg07775371	0.00250201	280193	82.3588	9.53244e+08
cg16107483	0.00250427	18.2844	2.7782	120.337
cg16281322	0.0025061	33.2533	3.42786	322.586
cg25203256	0.00250652	1.3576e+19	5.32345e+06	3.4622e+31
cg19737633	0.00250915	28.0384	3.22748	243.58
cg24191049	0.00250941	1348.43	12.5912	144407
cg22919370	0.00251022	29.0972	3.2695	258.953
cg19587777	0.00251069	0.109421	0.0260559	0.459512
cg09367367	0.00251426	9244.08	24.7411	3.45389e+06
cg01982455	0.00251702	9.01592e+65	1.47506e+23	5.51076e+108
cg02010196	0.00251963	195456	72.1595	5.29424e+08
cg05474605	0.00252234	12.9071	2.45505	67.8569
cg23173495	0.00252653	9.00262e+19	1.01091e+07	8.01723e+32
cg13372456	0.00252875	7.6697	2.04427	28.7752
cg07218344	0.00253123	5.02522e+16	725597	3.48028e+27
cg15380836	0.00254001	56.4951	4.11541	775.549
cg09943560	0.00254145	105.906	5.12915	2186.75
cg06572953	0.00254637	8.47845e+19	9.66967e+06	7.43398e+32
cg09407507	0.00254786	25.5317	3.1129	209.408
cg23288521	0.00254808	418531598689844	133251	1.31458e+24
cg21482489	0.0025532	56.4064	4.10754	774.596
cg04339424	0.00255423	3.15372e+29	2.15873e+10	4.60731e+48
cg25342397	0.00255604	694015	111.202	4.33136e+09
cg05355757	0.00255887	10.9446	2.31172	51.8163
cg18873530	0.00256281	7.47153	2.02203	27.6079
cg16617628	0.00256352	6.81463e+07	552.587	8.40396e+12
cg23889236	0.00256959	19.1053	2.8075	130.014
cg15043384	0.0025729	16.4113	2.66145	101.197
cg08217285	0.00257957	21.8632	2.94084	162.538
cg04689167	0.00258088	6687.37	21.7515	2.05599e+06
cg26080782	0.00258267	1.53962e+06	145.59	1.62815e+10
cg14020762	0.00258284	24.6914	3.06783	198.729
cg21706229	0.00258522	9.43143	2.19104	40.5979
cg09972205	0.0025867	1.96618e+06	158.351	2.44133e+10
cg25917853	0.00258698	15.5395	2.60854	92.5709
cg00031556	0.00258744	0.0879462	0.0180888	0.427587
cg17644776	0.00258779	23.3079	3.00541	180.76
cg26458072	0.00259094	18.4141	2.76716	122.536
cg18539745	0.00259833	65.5202	4.30813	996.466
cg12497564	0.00259861	11.2659	2.32957	54.4828
cg00898350	0.00259914	180.306	6.1343	5299.73
cg01025398	0.00260122	725.589	9.97151	52798.4
cg21759784	0.00260131	0.0121455	0.000688052	0.214393
cg14710040	0.00260148	42071.8	41.1488	4.30156e+07
cg06528559	0.00260261	10.1479	2.24556	45.8597
cg17707274	0.00261381	549.244	9.02969	33408.5
cg11484872	0.00261789	0.0470608	0.00642954	0.34446
cg23909657	0.00261857	75.6917	4.52081	1267.3
cg00581422	0.00262298	10.7104	2.28547	50.192
cg03374965	0.00262582	97.1891	4.92848	1916.56
cg00462570	0.00262703	12.2296	2.39301	62.4996
cg03165378	0.00262927	0.0752974	0.0139611	0.406105
cg09029526	0.00263524	23.8605	3.01867	188.6
cg05211768	0.00263666	8.11896	2.07361	31.7888
cg20322876	0.00263685	297.139	7.26405	12154.6
cg21963535	0.00263745	26.3194	3.12301	221.809
cg06791446	0.00264306	14.1719	2.51648	79.8116
cg13061637	0.00264368	2.28266e+06	163.368	3.18945e+10
cg20059140	0.00264479	9.71055	2.20597	42.7452
cg24402603	0.00265132	270.633	7.01731	10437.4
cg03359508	0.0026521	24.0084	3.02114	190.79
cg18555811	0.00266153	7.33032e+63	1.58866e+22	3.38232e+105
cg04944784	0.00266424	11.9215	2.36638	60.0585
cg26337998	0.00266816	20.8685	2.87388	151.535
cg18573327	0.00266926	9.97991	2.22397	44.7842
cg15258416	0.00267023	19.2219	2.79255	132.31
cg01570885	0.0026711	28.4955	3.20162	253.62
cg24199006	0.00267473	20.2543	2.84282	144.307
cg12474080	0.00267607	3.31673e+07	408.948	2.69e+12
cg08058894	0.00267654	11.1393	2.30953	53.7269
cg18661868	0.00267771	21.7387	2.91285	162.236
cg04098270	0.00267787	12.4907	2.40301	64.9257
cg08348496	0.00268201	11.0815	2.30461	53.2844
cg00524169	0.00268707	1.39563e+13	36402.1	5.35072e+21
cg25821304	0.00269428	14.3068	2.51628	81.3438
cg06296613	0.00269434	9.19035e+06	260	3.24856e+11
cg02384122	0.00269763	637.265	9.38311	43280.6
cg20499861	0.00269875	14.8171	2.54629	86.2216
cg23393521	0.00270265	17.7395	2.70953	116.141
cg17434257	0.00270427	0.0079163	0.000335236	0.186936
cg08827700	0.00271493	0.000758741	6.92842e-06	0.0830907
cg04355968	0.0027155	31.0591	3.28651	293.523
cg20744464	0.00271713	17.4919	2.69363	113.589
cg14852384	0.00271741	16.4855	2.63887	102.988
cg12210286	0.00271796	16.9293	2.66315	107.618
cg24378048	0.00271805	130.782	5.40524	3164.32
cg15343797	0.00271919	0.0523611	0.00761204	0.360177
cg13982688	0.00272178	11.2872	2.31389	55.0589
cg08596549	0.00272559	538.562	8.81325	32910.5
cg06437774	0.00274085	0.00496356	0.000154203	0.159769
cg01043383	0.00274602	220276416965423	90408.7	5.36693e+23
cg22814146	0.00274871	21.2064	2.87259	156.552
cg22029297	0.00274925	11.9058	2.35312	60.2381
cg22774472	0.00276483	13.1185	2.43095	70.7934
cg21028777	0.00276902	4.39322e+29	1.68483e+10	1.14554e+49
cg02557432	0.00277327	237.133	6.59345	8528.49
cg13406768	0.0027752	0.128371	0.0334482	0.492674
cg09691574	0.00277535	0.0278245	0.00266244	0.290787
cg17677397	0.00277702	0.0134251	0.000796765	0.226207
cg02849766	0.00278064	0.0371253	0.00428936	0.321326
cg01508380	0.00278344	23.4299	2.96542	185.121
cg04380519	0.00278483	25.2705	3.04339	209.831
cg09484039	0.00278727	15.5009	2.57124	93.4487
cg11935027	0.00279804	1.28816e+09	1369.37	1211759156628810
cg10396609	0.00279891	158.791	5.72385	4405.19
cg23570261	0.0028024	3.04794e-07	1.62465e-11	0.00571812
cg03251967	0.00280604	24.0544	2.98727	193.693
cg13323825	0.00280607	55.8805	3.99243	782.136
cg04369291	0.0028071	11.3533	2.30699	55.8727
cg06002683	0.00280937	16.0429	2.59805	99.0648
cg04623172	0.00281547	24.1064	2.98735	194.526
cg27304754	0.00281636	0.0273968	0.00258589	0.290263
cg27305383	0.00281707	25.6943	3.05323	216.23
cg01357334	0.00281756	15.4993	2.56604	93.6186
cg23626122	0.00282158	7.31948e+06	228.849	2.34105e+11
cg07229186	0.00282311	9.72463	2.18539	43.2731
cg10267817	0.00282649	3.10954e+06	170.215	5.68063e+10
cg07602492	0.00283405	1.43201e+11	6782.05	3.02365e+18
cg21123160	0.00283475	10.8707	2.2692	52.0769
cg11944428	0.00284108	445.529	8.11484	24460.9
cg09214254	0.00284283	59.3189	4.06079	866.515
cg26544685	0.00284427	1123.73	11.1422	113332
cg12573119	0.00285062	47.6108	3.76294	602.399
cg13830624	0.00285177	13.8858	2.46559	78.2024
cg13956692	0.00285444	562.935	8.77567	36110.7
cg11092048	0.00285601	10.2419	2.22063	47.2371
cg13912117	0.00285626	14.1274	2.47953	80.492
cg11140897	0.0028577	27.3536	3.1097	240.607
cg26054336	0.00285968	149.974	5.57191	4036.7
cg10118547	0.00286035	356.395	7.49617	16944.3
cg11821403	0.00286124	64.9709	4.18204	1009.37
cg25511807	0.00287033	262.783	6.74379	10239.8
cg23549179	0.00287263	0.0624879	0.010094	0.386838
cg24843443	0.0028732	4.05429e+06	183.354	8.96478e+10
cg10902825	0.00287785	11.8958	2.33463	60.6138
cg21878859	0.0028857	9.79617	2.18352	43.9496
cg14466942	0.00288779	16.1079	2.58828	100.246
cg09235885	0.00289414	4.67282e+13	47346.1	4.61184e+22
cg08508763	0.0028944	71.0041	4.29701	1173.28
cg12502759	0.00289463	2.66758e+97	2.09243e+33	3.40082e+161
cg18765637	0.00289505	0.0060272	0.000208656	0.174101
cg22777832	0.0029061	9.77806e+17	1.40611e+06	6.79965e+29
cg07272831	0.00291081	137405916101958	67607.3	2.79266e+23
cg24950182	0.00291519	17867.3	28.3273	1.12697e+07
cg25845890	0.00292254	241.269	6.50562	8947.78
cg18400845	0.0029238	21.0771	2.83046	156.952
cg04180299	0.0029243	8.43315	2.07041	34.3497
cg03974423	0.00292938	17.6214	2.66164	116.663
cg04835284	0.00293026	23.1858	2.92271	183.932
cg22090863	0.00293118	222.305	6.31948	7820.16
cg01533108	0.00293577	54.9935	3.92227	771.057
cg19008858	0.0029376	45.4849	3.67577	562.84
cg05799507	0.00293882	6.80285	1.92279	24.0685
cg20014960	0.00294	10.8699	2.25582	52.3773
cg19843036	0.0029429	10.5581	2.2332	49.9166
cg00636809	0.00295045	66.3477	4.17561	1054.22
cg02843237	0.00295457	33.2927	3.30019	335.86
cg23725321	0.00295649	16.0381	2.57302	99.9681
cg19824388	0.00295722	1.91337e-13	7.84996e-22	4.6637e-05
cg18809600	0.00297185	1376.37	11.6913	162036
cg25021051	0.00297281	59.8804	4.02374	891.126
cg25841634	0.00297513	801.179	9.72052	66034.3
cg02583247	0.00297631	0.02585	0.00231671	0.288436
cg12117660	0.0029901	21.6179	2.84167	164.458
cg01234063	0.00299096	51.4917	3.81609	694.794
cg05941624	0.00299319	15.8284	2.55556	98.0362
cg12497786	0.00299355	83.1879	4.49045	1541.1
cg04555220	0.00299774	10.5836	2.22841	50.2662
cg04406444	0.00299818	2.90604e-91	4.72596e-151	1.78695e-31
cg05019168	0.0029994	58.4322	3.9805	857.763
cg26475085	0.00300078	31.7449	3.23524	311.488
cg22459359	0.00300126	3.49185e+25	4.71068e+08	2.58838e+42
cg15734706	0.00300349	15.7907	2.55184	97.7128
cg26074223	0.00300639	83.2285	4.48539	1544.34
cg25485192	0.00301239	415.472	7.73493	22316.5
cg22310240	0.00301342	90.0739	4.60404	1762.22
cg20300246	0.00301683	20.3212	2.77746	148.679
cg19197750	0.00302009	3.37676e+153	1.16014e+52	9.82859e+254
cg23198559	0.00302139	14.4178	2.47156	84.1058
cg13179074	0.00302285	0.0528498	0.00756915	0.369011
cg20869203	0.00302307	22.8716	2.88983	181.017
cg10315922	0.00302573	692123	95.4494	5.01873e+09
cg13774080	0.0030263	0.00382097	9.63693e-05	0.151499
cg14607407	0.00303025	658.1	9.01755	48028
cg18649939	0.00303059	42.2818	3.55691	502.613
cg08209473	0.00303288	17.6523	2.64517	117.801
cg09878269	0.00303385	0.0282092	0.00266563	0.298525
cg09425356	0.00303623	61.8452	4.04401	945.802
cg26053358	0.00303726	0.0269214	0.00246587	0.293918
cg24425171	0.00303728	16.6295	2.59148	106.711
cg11695653	0.00303761	28339.6	32.2201	2.49266e+07
cg05070742	0.00303794	549.347	8.47281	35617.7
cg05458220	0.00303959	76.3913	4.34255	1343.82
cg00916884	0.00303978	10.3874	2.20935	48.8372
cg07083366	0.00304494	0.0114715	0.000597268	0.220328
cg12624825	0.0030468	0.000160603	4.96495e-07	0.0519505
cg07395354	0.00305093	15.1983	2.51157	91.9696
cg05637903	0.00305489	957.939	10.202	89948
cg07233159	0.00305703	527.828	8.33638	33420.1
cg20562630	0.00305732	0.00805952	0.000331794	0.195772
cg13919438	0.00306094	61.2676	4.02194	933.31
cg01607441	0.00306549	0.0607545	0.0095153	0.387913
cg06817772	0.00307037	0.0807211	0.0152544	0.427148
cg26622232	0.00307081	2.78819e+51	2.43916e+17	3.18716e+85
cg26811079	0.00307428	1.7826e+18	1.46886e+06	2.16335e+30
cg20143982	0.00307572	33.4759	3.27456	342.224
cg08637438	0.00307917	11.2203	2.26297	55.6331
cg04134279	0.00308239	12.116	2.32203	63.2194
cg20532370	0.00308376	9.38369	2.12988	41.342
cg15942562	0.00308518	0.0202961	0.00153579	0.26822
cg25052156	0.00308704	16.4323	2.57297	104.945
cg25566730	0.00308805	2.91029e+11	7414.84	1.14227e+19
cg22048683	0.00309154	0.000113066	2.74604e-07	0.0465538
cg12199221	0.00309627	7.5361	1.97676	28.7302
cg20528183	0.00309948	5993.09	18.8075	1.90972e+06
cg20758982	0.00310231	9.16378	2.11096	39.7804
cg05055652	0.00310747	6.73075e+29	1.1395e+10	3.97569e+49
cg11273478	0.00311049	15.1829	2.50162	92.1486
cg26179590	0.00312214	118.549	4.99519	2813.48
cg02444961	0.00312424	330.568	7.05417	15490.8
cg18849621	0.00312871	7.79446e+10	4646.22	1.30759e+18
cg01494454	0.00313137	12.5984	2.34636	67.6447
cg01905809	0.00313288	9983.46	22.1885	4.49194e+06
cg02101773	0.00313305	20.213	2.75081	148.526
cg27152619	0.00313681	99.2818	4.69849	2097.88
cg07197230	0.0031445	6.13231	1.84038	20.4334
cg22236469	0.0031474	4.22075e+10	3741.29	4.76165e+17
cg02810134	0.0031476	4.91906e-05	6.79901e-08	0.0355893
cg10656742	0.0031488	22.5434	2.85063	178.279
cg12106945	0.00314881	5.96378e+07	411.575	8.64159e+12
cg12472597	0.00314911	35.1515	3.30978	373.326
cg21833640	0.00315087	3.38489e+25	3.82753e+08	2.99344e+42
cg09823395	0.0031564	27.7234	3.05424	251.645
cg07916488	0.00316645	2492.15	13.8277	449157
cg07692172	0.00316909	0.000125999	3.23753e-07	0.0490369
cg11550126	0.0031731	21.78	2.81317	168.624
cg08450058	0.00317698	438.565	7.70416	24965.7
cg05976753	0.0031809	13.4716	2.3931	75.8359
cg20059511	0.00318234	6.19159e+37	4.77891e+12	8.02185e+62
cg06288821	0.00319044	10.423	2.19463	49.5023
cg08057985	0.00319385	54.162	3.81265	769.42
cg08081156	0.00319809	9.64739	2.13765	43.5396
cg09644722	0.00320096	11.731	2.28209	60.3026
cg06442736	0.00320191	0.00599982	0.000199882	0.180096
cg07081725	0.00320788	144.968	5.29557	3968.54
cg19482581	0.00320803	2.38941e+24	1.46343e+08	3.90132e+40
cg15377871	0.00320823	0.0520264	0.0072851	0.371545
cg19626500	0.00320979	9.22227e+92	1.36295e+31	6.24013e+154
cg00018524	0.0032171	1.35709e+06	112.947	1.63059e+10
cg11871421	0.00321859	17.9288	2.62774	122.326
cg02671750	0.00321867	49.4358	3.68993	662.315
cg12533363	0.00322002	47.8931	3.65057	628.326
cg11993754	0.00322111	17.0498	2.5835	112.521
cg14321697	0.00322623	0.00780188	0.000308718	0.197168
cg21072629	0.0032268	38.2365	3.38375	432.076
cg10975873	0.00322764	28700.5	30.9918	2.65786e+07
cg25356886	0.0032277	373.664	7.25337	19249.7
cg07661246	0.00323165	0.00111877	1.21473e-05	0.10304
cg22606869	0.00323244	183.832	5.71815	5909.96
cg13866577	0.00323872	43.7114	3.53522	540.472
cg03087198	0.0032398	539600747112256	84000	3.4663e+24
cg02169487	0.00324753	35.445	3.29374	381.436
cg15395441	0.00324824	10.8182	2.21556	52.8231
cg20279402	0.00324963	41.2032	3.46304	490.235
cg19453997	0.00325083	3805.49	15.7008	922359
cg25751371	0.00325145	12.279	2.31092	65.2442
cg22588542	0.00325183	2.95484e+55	3.36465e+18	2.59495e+92
cg13960352	0.00325299	559868	83.118	3.77116e+09
cg09975039	0.00325307	1.5788e+06	117.504	2.1213e+10
cg09833545	0.00325983	0.00236688	4.21616e-05	0.132873
cg03486010	0.00326243	34.1599	3.24967	359.083
cg01330280	0.00326497	16.2101	2.53351	103.717
cg06374075	0.00326547	845.272	9.47866	75378.2
cg06676847	0.00326964	21.3894	2.77825	164.674
cg07755653	0.00327104	893.799	9.64903	82793.4
cg15447540	0.00327154	126.431	5.02482	3181.18
cg07236943	0.00327201	1196.29	10.6329	134592
cg10708548	0.00327228	9.47866e+07	457.821	1.96245e+13
cg02475131	0.00328037	1.21338e+08	495.528	2.97117e+13
cg04020079	0.00328341	870.042	9.54557	79301.1
cg15345126	0.00328617	1.56681e+07	249.922	9.82265e+11
cg03498402	0.00329408	6193.16	18.3251	2.09304e+06
cg21877201	0.0032966	17.7503	2.60634	120.887
cg23457862	0.00329972	9.10837	2.08672	39.7573
cg11528995	0.00330168	41.9072	3.46821	506.375
cg22185268	0.00330343	76.0115	4.22792	1366.57
cg14471096	0.0033041	3.17504e+54	1.38784e+18	7.26375e+90
cg01633184	0.003309	127.454	5.01883	3236.72
cg00419105	0.00331017	1.25985e+30	1.03703e+10	1.53055e+50
cg11409620	0.00331303	1804.71	12.1161	268816
cg17283447	0.00331705	10.7029	2.19995	52.0702
cg19828063	0.0033209	13.6222	2.38319	77.8635
cg20638016	0.0033211	164.977	5.46168	4983.36
cg03606222	0.00332338	1.51449e+37	2.29713e+12	9.98494e+61
cg01873236	0.00332378	26.674	2.9793	238.815
cg15837913	0.00332489	12.2726	2.30144	65.4449
cg11366788	0.0033286	17.6486	2.59628	119.969
cg21574349	0.0033339	1.89382e+12	11996.7	2.98962e+20
cg05107361	0.00333417	369.714	7.13085	19168.6
cg12799029	0.00333487	117.899	4.87756	2849.82
cg18149689	0.00333495	12.956	2.342	71.6728
cg25310824	0.00333931	15.1433	2.46596	92.9944
cg12191938	0.00334909	6.82017	1.89128	24.5944
cg27079232	0.00334977	188.349	5.68955	6235.16
cg17029019	0.0033539	6.62684	1.87295	23.4469
cg16073349	0.00335428	3.02684e+07	303.59	3.01781e+12
cg11027570	0.00336464	11.6539	2.25754	60.1595
cg02215070	0.00337633	734701	87.8473	6.14458e+09
cg22698996	0.00337709	15.2721	2.46754	94.522
cg12661092	0.00338506	5.14012e+10	3524.58	7.49617e+17
cg27304043	0.00338559	23.4691	2.84346	193.708
cg14564692	0.00338738	14.3817	2.41752	85.5554
cg15012692	0.00338796	189.981	5.68189	6352.25
cg26353903	0.00338856	0.0423163	0.00510233	0.350951
cg13725958	0.00339152	74.7311	4.17048	1339.11
cg00863099	0.00339437	9.18248	2.08311	40.477
cg18213979	0.00340986	10.7831	2.1952	52.968
cg09874600	0.00341076	57.2475	3.81211	859.702
cg12595585	0.00341128	1.33979e+06	106.098	1.69185e+10
cg00334798	0.00341484	22.0594	2.78046	175.013
cg14597214	0.00341889	11.7277	2.25596	60.9667
cg19992633	0.00341971	15.2922	2.46263	94.96
cg13792025	0.00342312	1.26472e+07	221.971	7.20591e+11
cg11973877	0.00343058	13.6418	2.37003	78.5216
cg22511947	0.00343292	3.14008e+12	13368.7	7.37551e+20
cg20758593	0.00343774	0.0246003	0.00205579	0.294375
cg03077712	0.00343779	0.0666583	0.0108621	0.409066
cg11955641	0.0034385	3.46419e-10	1.59085e-16	0.000754352
cg23264519	0.00343889	6.71283e+24	1.56307e+08	2.88292e+41
cg21172322	0.00344243	10.3019	2.1589	49.1584
cg12427017	0.00344644	0.00391533	9.54232e-05	0.160651
cg22826239	0.00345016	620.272	8.33728	46146.6
cg19918230	0.00345338	36.8572	3.28513	413.516
cg19012170	0.0034534	44.2757	3.4899	561.716
cg06243989	0.00346156	0.0639138	0.010112	0.403974
cg01769501	0.00346325	4.06355e+08	687.047	240339103768493
cg18280382	0.0034662	277.457	6.3824	12061.7
cg19597031	0.00346898	3.15264e+23	5.50806e+07	1.80447e+39
cg04817996	0.00347319	135.829	5.04047	3660.27
cg03698393	0.00347793	15.9689	2.4898	102.42
cg19248656	0.00348421	69.162	4.03198	1186.36
cg01207951	0.0034869	34.7393	3.21376	375.516
cg22212238	0.00348698	94.8074	4.47183	2010.01
cg09856299	0.00348821	54.6956	3.73108	801.808
cg24275769	0.00349295	27.8704	2.9878	259.978
cg18503711	0.00349393	1.40093e+09	1019.41	1925220880628920
cg18470125	0.00349451	4.21877e+21	1.29565e+07	1.37367e+36
cg23883696	0.00349967	0.115948	0.0273019	0.492422
cg26028810	0.00350563	413.55	7.24396	23609.1
cg14392031	0.00350858	39.8419	3.35651	472.924
cg07169834	0.00350951	24.5643	2.86314	210.75
cg15044073	0.00351115	23.6023	2.8255	197.157
cg12766058	0.00351587	1.78046e+07	240.725	1.31687e+12
cg16615348	0.00351615	57.5639	3.78557	875.322
cg18721249	0.00352734	129.41	4.93408	3394.12
cg02845591	0.00352866	18.5705	2.60873	132.195
cg10539069	0.00353151	79.631	4.20559	1507.78
cg13604246	0.00353247	244.003	6.0724	9804.6
cg21322855	0.00354036	414.712	7.21979	23821.5
cg12181621	0.00354498	24.6494	2.85977	212.463
cg00247599	0.00354509	6800.09	18.0533	2.56138e+06
cg20557935	0.00354782	1.47056e+11	4579.66	4.72209e+18
cg16494192	0.00354945	0.0563419	0.00814919	0.389537
cg10621012	0.00355554	117.645	4.76908	2902.12
cg15375883	0.00356098	1266.44	10.3809	154500
cg00800993	0.0035633	11.9688	2.25455	63.5391
cg07081054	0.00356548	12.3083	2.27504	66.5891
cg12355180	0.00356874	229.649	5.92906	8894.96
cg09288789	0.00356972	31.0025	3.07777	312.29
cg05806645	0.00357056	9.98908	2.12421	46.9737
cg25845747	0.00357346	8.14012e+38	5.4348e+12	1.21921e+65
cg19832184	0.00357535	0.0338179	0.00346447	0.330108
cg12827530	0.00357892	6.02324	1.79948	20.161
cg11760700	0.00357983	161.619	5.27887	4948.18
cg09191232	0.00358173	26.1092	2.90717	234.485
cg12273770	0.00358197	18.2526	2.58587	128.838
cg16254190	0.0035831	1.01449e+10	1875.13	5.48858e+16
cg13578353	0.00358358	44.6939	3.4656	576.392
cg03901836	0.00359371	0.00551497	0.000166473	0.182702
cg27309542	0.00359657	98.8596	4.48774	2177.76
cg17390301	0.00359822	7.91432	1.96606	31.8589
cg15172739	0.00360034	0.0576367	0.00844	0.3936
cg15419211	0.00360349	1.64911e+29	3.50717e+09	7.75427e+48
cg27249422	0.00360414	20.0775	2.66418	151.306
cg07007118	0.00360896	9.6634	2.0976	44.5181
cg14557185	0.00361001	6.9711	1.88533	25.776
cg13435432	0.00361473	18.6713	2.60012	134.078
cg00730561	0.00362225	14.1186	2.37243	84.0219
cg05178604	0.00362528	11.1457	2.19595	56.5708
cg10204195	0.00363633	4.82797e+26	5.0093e+08	4.6532e+44
cg20361540	0.00363878	5942.41	16.9922	2.07814e+06
cg14665845	0.00364516	1.08799e+71	1.40531e+23	8.42316e+118
cg12813797	0.00364776	0.141756	0.0379764	0.529136
cg11490941	0.00364923	11.7231	2.22982	61.6339
cg23373626	0.00365251	16.0989	2.4721	104.84
cg02141940	0.00365391	0.0108511	0.000513763	0.229186
cg11680055	0.00365433	7.87524	1.95835	31.6692
cg02214441	0.00365696	0.00318085	6.58134e-05	0.153735
cg10548034	0.00366043	1.61086e+16	188913	1.37358e+27
cg06433023	0.00366059	6.74491	1.86154	24.4388
cg01065586	0.00366279	11.4347	2.21034	59.1546
cg16612100	0.00366287	1.22489e+23	3.2756e+07	4.58043e+38
cg07492770	0.00366326	53.9087	3.66143	793.72
cg26111030	0.00366345	10.3469	2.13951	50.0384
cg12938003	0.00366508	17.219	2.52506	117.42
cg22706157	0.00367198	0.000998682	9.44092e-06	0.105643
cg08266366	0.00368053	14.9695	2.4106	92.9581
cg00294684	0.00368072	0.0610272	0.00924561	0.40282
cg15218983	0.00368095	0.00324507	6.78684e-05	0.155161
cg04482110	0.00368186	15.7886	2.45254	101.641
cg25479916	0.00368188	8.3202	1.99142	34.7621
cg10715223	0.0036903	9.00749	2.04273	39.7189
cg22304507	0.00369367	35.7764	3.19711	400.346
cg00263592	0.00369938	16.7272	2.49659	112.072
cg17351862	0.00370054	0.0903525	0.0178217	0.458069
cg14512004	0.0037009	9.71118e+63	6.02694e+20	1.56476e+107
cg11592613	0.00370168	164124	49.3816	5.45478e+08
cg07379574	0.00370304	0.003019	5.99851e-05	0.151944
cg21499459	0.00370939	143.186	5.00928	4092.82
cg13391638	0.00371813	10.0119	2.11146	47.4738
cg15078479	0.00371908	1.71406e+88	4.1955e+28	7.00278e+147
cg01314834	0.0037224	3.28676e+20	4.51051e+06	2.39503e+34
cg24546463	0.00373081	15.5574	2.43437	99.4233
cg02779075	0.00373201	26.9359	2.90825	249.478
cg20375220	0.00373583	276.969	6.18748	12397.9
cg16537245	0.0037394	284.715	6.24058	12989.6
cg12929625	0.00374392	7.84416e+11	7124.64	8.63636e+19
cg00941258	0.00374834	8.50488	2.00009	36.1649
cg19280364	0.00375421	34.7224	3.15289	382.392
cg14022913	0.00375459	11.2149	2.18686	57.5135
cg06931612	0.00376031	0.00241874	4.10982e-05	0.142349
cg26070134	0.00376035	0.137898	0.0361031	0.526708
cg04175292	0.00376217	45.6012	3.44167	604.203
cg06135480	0.00376763	2527.62	12.6066	506784
cg24334243	0.00376965	21.2074	2.68533	167.485
cg15006396	0.00377346	3.91972e+12	11798.7	1.30219e+21
cg05360949	0.00377415	459402	67.7185	3.11658e+09
cg16786703	0.003775	23.8408	2.78801	203.867
cg07170824	0.00377582	16.9159	2.49513	114.682
cg02322203	0.00377804	9.26696	2.0538	41.8135
cg11977693	0.00377883	23.553	2.77643	199.805
cg15766075	0.00378111	15492.9	22.6044	1.06187e+07
cg12590774	0.00378801	1.21886e+36	4.54626e+11	3.2678e+60
cg16179182	0.0037895	10.6544	2.14741	52.8618
cg04309093	0.00379431	9.6915	2.08226	45.1073
cg07509935	0.00379733	12.4637	2.25815	68.7919
cg15507817	0.00379761	158414	47.7353	5.25711e+08
cg18145088	0.00380086	0.00116971	1.20946e-05	0.113127
cg09342567	0.00380556	22.2547	2.72164	181.976
cg23916948	0.00380669	3.40246e+23	3.92194e+07	2.95179e+39
cg09124703	0.00381058	21825.5	25.1084	1.89719e+07
cg09228833	0.00381346	10.3784	2.12698	50.6401
cg23210521	0.00381585	12.379	2.25116	68.0712
cg05971061	0.00381763	28.6943	2.95196	278.922
cg03674127	0.00381962	1.44143e+09	897.795	2314246991803940
cg05569784	0.00382083	16.3393	2.46132	108.467
cg15119377	0.00382201	21.6053	2.69312	173.326
cg04155195	0.00382237	17930.2	23.513	1.3673e+07
cg03145963	0.00383181	23.203	2.75415	195.479
cg05581701	0.00383338	12.9366	2.28141	73.356
cg04616691	0.00383881	83.4006	4.15677	1673.33
cg00967013	0.00384035	207592	51.5669	8.357e+08
cg24074477	0.00384471	9.29628	2.05001	42.1563
cg10850626	0.00384934	54.0064	3.61096	807.731
cg27561954	0.00385289	7.13158	1.88173	27.028
cg20893022	0.00385313	0.0210684	0.00153714	0.288767
cg19894975	0.00385757	14.1379	2.34473	85.246
cg08970083	0.00386045	2866.46	12.9444	634758
cg24121098	0.00386256	5.09556e+132	4.79713e+42	5.41255e+222
cg23565749	0.00386853	61.4003	3.75754	1003.32
cg01855735	0.00387298	2.15558e+12	9209.56	5.04533e+20
cg03576419	0.00387314	26.2185	2.85735	240.576
cg08519643	0.00387467	34.1761	3.11113	375.429
cg09436502	0.00387846	25.848	2.84337	234.974
cg11468363	0.00388037	13.2799	2.2954	76.8301
cg25133016	0.00388106	16.819	2.47632	114.234
cg21964551	0.00388169	115.797	4.60223	2913.57
cg21923959	0.00388301	0.00850827	0.000334715	0.216276
cg12745764	0.00388334	10.3686	2.11968	50.7188
cg26348348	0.00388555	26.8621	2.87747	250.767
cg12004276	0.00388667	20.7561	2.64857	162.66
cg02570563	0.00388838	566.529	7.65825	41909.7
cg09540676	0.00389588	16.665	2.46705	112.573
cg20278936	0.00390562	3.54646e+40	1.01926e+13	1.23397e+68
cg26014634	0.0039062	8.906	2.01672	39.3296
cg06817207	0.00390817	1.89428e+51	2.80034e+16	1.28138e+86
cg01244650	0.00392295	25.5294	2.82432	230.764
cg01089060	0.00393167	32.5624	3.05162	347.458
cg15947096	0.00393398	3.40746e+12	10319.3	1.12515e+21
cg01391299	0.00394304	33.0643	3.06431	356.769
cg14345524	0.00394354	363.926	6.60285	20058.4
cg14370448	0.0039504	23.5993	2.74955	202.552
cg21079345	0.00395264	87180.3	38.0616	1.99687e+08
cg09062595	0.00395456	278.288	6.05242	12795.6
cg14642395	0.00395757	241.122	5.77936	10059.9
cg25027501	0.00395849	201.489	5.4563	7440.52
cg03218146	0.00396283	8.201e+08	707.823	950186902279608
cg06037943	0.00396511	24.9204	2.7954	222.16
cg20460101	0.00396977	2.21996e+10	2025.65	2.43291e+17
cg16578737	0.00397232	3.10368e+06	118.69	8.11596e+10
cg10599444	0.00397274	24.5822	2.78194	217.218
cg26284390	0.00397427	7.26787e+08	678.032	779048982539813
cg09935767	0.0039789	15420.9	21.7647	1.09261e+07
cg26959990	0.00398254	7.1135e+118	9.0208e+37	5.60946e+199
cg22105332	0.00398541	11.2772	2.16751	58.673
cg18151858	0.00398629	15.3966	2.39397	99.0216
cg12071544	0.00398901	9.36016	2.04202	42.9048
cg00275232	0.00398955	12.5361	2.24157	70.1085
cg02837027	0.00399049	0.0463906	0.00573502	0.375253
cg13043862	0.00399396	7.49146e+06	156.284	3.59102e+11
cg21055978	0.00399489	10371.3	19.1216	5.62529e+06
cg01114900	0.00399768	8.9068	2.0092	39.4839
cg09234567	0.00399815	10.4383	2.11349	51.5537
cg07178031	0.00400062	172.969	5.1753	5780.95
cg01342926	0.00400066	10.1923	2.09724	49.5329
cg27622405	0.00400107	2.24657e+98	2.36787e+31	2.13149e+165
cg22229906	0.00400181	7.56828	1.90717	30.0334
cg14529080	0.0040019	1.10536e+23	2.24167e+07	5.45044e+38
cg08542473	0.0040037	1.83829e+20	2.90672e+06	1.16258e+34
cg10604396	0.00400622	80.9514	4.06018	1614
cg06241292	0.00400891	12.9904	2.26509	74.5003
cg06059056	0.00401161	7.57795	1.90724	30.1091
cg26695445	0.00401663	281.843	6.03737	13157.3
cg00293936	0.00401799	95.2332	4.27184	2123.06
cg03304714	0.00401894	7.58349e+58	5.7972e+18	9.92017e+98
cg02835036	0.00402318	553977382484442	49789.7	6.16374e+24
cg20451226	0.00402466	4.06182e+37	9.56652e+11	1.72459e+63
cg07207099	0.00402655	9.98164	2.08101	47.8774
cg14346208	0.00402687	6.99814	1.85843	26.3524
cg23017915	0.00402978	13.2628	2.27784	77.2232
cg10201533	0.00403177	0.0346972	0.00351078	0.342913
cg16545496	0.00404463	10.4275	2.10852	51.5686
cg07115116	0.00404489	0.0342053	0.00342469	0.341638
cg22116234	0.004045	5.14479e+110	1.68572e+35	1.57018e+186
cg09550097	0.00404675	0.00754811	0.000269681	0.211265
cg25661992	0.00405067	1133.67	9.36642	137214
cg16762195	0.00405165	967.972	8.90619	105204
cg24405537	0.00405634	15.0708	2.36929	95.8633
cg10829621	0.00405737	20.9021	2.62884	166.194
cg07162198	0.00405789	13.2931	2.27643	77.6241
cg03261272	0.00405821	5.75373e+07	293.231	1.12899e+13
cg25135143	0.0040592	31410	26.8982	3.66786e+07
cg00686761	0.0040592	1.97115e+24	5.29491e+07	7.33804e+40
cg16296442	0.00405992	12.6562	2.24095	71.4779
cg21377712	0.00406041	6.67553e+11	5741.35	7.7617e+19
cg06299996	0.00406124	9.13559e+12	13183.6	6.33054e+21
cg14529331	0.00406408	250.364	5.78557	10834.2
cg00557360	0.00406793	19.389	2.56529	146.547
cg23333220	0.00406945	51.5213	3.4991	758.608
cg14629509	0.00407391	119030	40.9536	3.45955e+08
cg05332077	0.00407942	13.0366	2.26007	75.1984
cg18090384	0.00408064	14.0542	2.31452	85.34
cg07962218	0.00408616	2.36878e-09	3.06904e-15	0.0018283
cg27037648	0.00408707	9.37456e+25	1.75286e+08	5.01365e+43
cg27017993	0.00409371	0.0837277	0.0153992	0.455239
cg06686746	0.00410186	263.748	5.85938	11872.1
cg05902063	0.00410288	1.24033e+17	263447	5.8396e+28
cg17274681	0.0041044	359.767	6.46387	20023.9
cg01010211	0.00410813	5.21512	1.68807	16.1116
cg09991092	0.00411101	227.898	5.589	9292.82
cg07190229	0.00411608	54.7474	3.55507	843.099
cg20789691	0.00411696	0.00080344	6.1746e-06	0.104544
cg23678594	0.00411821	507.344	7.19688	35765.1
cg12089570	0.00412992	0.0716199	0.0118193	0.433986
cg16587838	0.00413284	51.3178	3.47874	757.033
cg17398851	0.00413777	21659.6	23.5588	1.99135e+07
cg12453288	0.00413964	121.656	4.56914	3239.14
cg14602164	0.0041449	20515.6	23.1278	1.81985e+07
cg17204129	0.00415021	8.68472	1.98101	38.0737
cg14498674	0.00415545	6167.2	15.786	2.40937e+06
cg11461627	0.0041579	330.213	6.25503	17432.5
cg04653522	0.00416519	12.7555	2.23553	72.7799
cg02595809	0.00417383	19.5784	2.55845	149.823
cg16002963	0.00417444	232.389	5.58838	9663.7
cg19404582	0.00417503	0.0303358	0.00277534	0.331585
cg14096180	0.00417948	59.127	3.62573	964.221
cg03119639	0.00418545	662209504359717	47614.7	9.20979e+24
cg11299459	0.00418838	125.168	4.59083	3412.69
cg23515460	0.00419093	26.5809	2.81498	250.995
cg18167955	0.00419146	7.7132e+19	1.88176e+06	3.16159e+33
cg02633761	0.00419419	13.8905	2.2934	84.1312
cg10018845	0.00419431	5.13484e+11	4944.85	5.33213e+19
cg13759778	0.00419976	0.0986884	0.0202161	0.481764
cg25945374	0.00420299	20.6116	2.5962	163.638
cg01027411	0.00421805	17.8645	2.47977	128.698
cg22119665	0.00421807	9.98755	2.0647	48.3127
cg20416037	0.00421938	21.1551	2.61524	171.127
cg13107060	0.00422919	182.402	5.15032	6459.87
cg24358066	0.00423258	7.17109e+18	861209	5.9712e+31
cg24165760	0.00423266	9.76639	2.04896	46.5516
cg12463851	0.00423857	6.91366	1.83748	26.0132
cg18043828	0.00423948	184935	45.4182	7.53021e+08
cg03408904	0.00424329	8.19224	1.93791	34.6315
cg20870885	0.00424811	23.8558	2.71167	209.871
cg03163184	0.00424962	15.6325	2.37397	102.939
cg14973797	0.00425082	15.2029	2.35313	98.2224
cg00566759	0.00425656	13.6145	2.27227	81.573
cg08045766	0.00425755	126043	40.1044	3.96138e+08
cg06768423	0.00425764	0.0339783	0.00334251	0.345407
cg12077168	0.00426077	6.47797e+10	2498.17	1.67979e+18
cg10765212	0.00426307	10.6818	2.10485	54.2081
cg23313126	0.00427888	13.5231	2.26511	80.735
cg20701689	0.00427975	35.9325	3.07825	419.441
cg01934883	0.00428131	115.121	4.43595	2987.59
cg07386190	0.00428259	260.512	5.73142	11841.1
cg20393975	0.00428411	8.11804e+44	124345656105642	5.29996e+75
cg23756442	0.00428588	0.0941249	0.0185984	0.476359
cg07115304	0.00428689	838.562	8.26787	85050.4
cg21451378	0.0042884	9.39405	2.01953	43.6973
cg27254295	0.00429026	990.856	8.70877	112736
cg06311934	0.00429322	0.0133571	0.000690809	0.258266
cg14225926	0.00429889	142078473565525	27415.2	7.36319e+23
cg00753885	0.00430135	0.0360162	0.00367782	0.3527
cg24683680	0.00430221	0.0975185	0.0197297	0.482009
cg25594899	0.00430372	10.4941	2.0896	52.7017
cg04781115	0.00430446	380738	56.1612	2.58117e+09
cg15348640	0.00430529	17.3178	2.44472	122.675
cg04742345	0.00430611	340.151	6.21676	18611.4
cg18784506	0.00431084	9.09621	1.99746	41.423
cg04817190	0.00431395	38.1426	3.12954	464.879
cg23207710	0.00431906	7.03627e+16	189240	2.6162e+28
cg03611632	0.00432284	22320.2	23.0055	2.16554e+07
cg05939495	0.00432365	0.029524	0.00262668	0.331852
cg12431087	0.00432632	34.1798	3.02147	386.653
cg20083676	0.00432807	16.8723	2.42207	117.533
cg05163329	0.00432883	8.16131	1.92943	34.5216
cg27175634	0.00433018	161.821	4.91463	5328.17
cg14263244	0.00434544	2.80446e+10	1852.08	4.24657e+17
cg10660253	0.0043467	0.102645	0.0214717	0.490691
cg00520708	0.00434761	66.9337	3.72321	1203.29
cg04707531	0.00434766	8574.42	16.9821	4.3293e+06
cg11647690	0.004349	37.6922	3.11092	456.683
cg16537383	0.00435097	1.84572e+13	14054.7	2.42387e+22
cg23699648	0.00435359	58.3269	3.56483	954.331
cg18453446	0.00435554	21.0237	2.59092	170.594
cg07126167	0.00435686	11.9179	2.16958	65.4678
cg22249612	0.00435979	89.1208	4.068	1952.43
cg19730813	0.0043609	20.2069	2.5583	159.606
cg00415993	0.0043617	13.8305	2.27238	84.1776
cg01508023	0.0043626	0.0913991	0.0176419	0.473521
cg18197332	0.00436354	42.3887	3.22418	557.289
cg06327150	0.00436735	9.0104	1.98718	40.8556
cg16181190	0.0043711	1.49649e+76	6.1669e+23	3.63144e+128
cg06014401	0.0043722	164.996	4.92597	5526.58
cg11439004	0.00437388	11.2721	2.13058	59.6363
cg14167139	0.00437472	387.985	6.43194	23403.8
cg07849972	0.00437727	398675	56.0416	2.83614e+09
cg10959198	0.00437847	6.03917	1.75309	20.8042
cg00101227	0.00438111	0.0316649	0.00294559	0.340394
cg23609811	0.00438912	168.963	4.95511	5761.44
cg13487553	0.0043947	58.3185	3.55422	956.903
cg00249974	0.00439836	0.000288916	1.0597e-06	0.0787701
cg18712677	0.00439888	887274	71.5698	1.09998e+10
cg19534423	0.00440225	20.8552	2.57799	168.712
cg20052718	0.00440317	0.0522729	0.00685687	0.3985
cg24141863	0.00441119	2.27282e+19	1.07554e+06	4.80293e+32
cg17283453	0.00441257	0.093803	0.0183938	0.478367
cg15379633	0.00441274	17.5723	2.44266	126.414
cg14962032	0.00442675	61.818	3.61107	1058.26
cg17120764	0.00443027	9.23251	1.99746	42.6738
cg09593286	0.00443061	16.1365	2.37658	109.563
cg06537201	0.00443199	3.66953e+22	1.05462e+07	1.2768e+38
cg00116554	0.00443518	517630	59.9979	4.46584e+09
cg14550518	0.00443952	46.6255	3.30469	657.834
cg27532187	0.00443979	11.6893	2.14881	63.5889
cg15214605	0.0044441	4.16506e+18	618478	2.8049e+31
cg20528093	0.00444816	10.8862	2.10102	56.4058
cg11986810	0.0044526	261067578459252	30336.4	2.24668e+24
cg01283300	0.00445413	14.0327	2.273	86.6326
cg01685843	0.00445463	9.05911e+07	297.485	2.75871e+13
cg15080119	0.00445537	7.10506	1.8395	27.4433
cg17298489	0.00445556	270.903	5.7043	12865.4
cg10102242	0.00445605	11.6853	2.14709	63.596
cg05951308	0.00445818	1.33478e+115	6.02194e+35	2.95858e+194
cg21615583	0.0044593	8.31268	1.9312	35.7812
cg20678665	0.00446674	0.0111939	0.000505856	0.247704
cg11330108	0.00446801	236.469	5.46184	10237.8
cg27522780	0.00446903	29.7522	2.86865	308.575
cg16886581	0.00446946	20.0481	2.53756	158.391
cg10294836	0.00447183	3.63412e+27	3.62215e+08	3.64613e+46
cg13801416	0.00447299	608060	62.5326	5.91271e+09
cg05848509	0.00447319	14.9729	2.31722	96.7489
cg23296392	0.00447754	48.5061	3.33705	705.067
cg20525183	0.0044788	1.06051e+07	151.687	7.41448e+11
cg12727462	0.00447987	11.2676	2.12081	59.8628
cg05361542	0.00448014	89.9762	4.04184	2002.98
cg26448489	0.00448136	10.5188	2.0759	53.2995
cg03651957	0.00448197	11.9044	2.15713	65.6957
cg13946767	0.00448601	9.44284	2.00716	44.4245
cg06605053	0.00448946	127.02	4.49494	3589.42
cg01742826	0.00448959	1.62001e+12	6137.03	4.27638e+20
cg14610403	0.00449248	21.4591	2.58858	177.894
cg19361865	0.00449529	28.4053	2.82338	285.779
cg11960393	0.00449741	1.59794e+16	105904	2.41105e+27
cg26502852	0.00449745	4.41144	1.5845	12.282
cg06537680	0.00450061	15.0985	2.32026	98.2499
cg00674304	0.00450355	12.0799	2.16494	67.403
cg13920824	0.00450585	9.50452e+06	145.52	6.20779e+11
cg13199577	0.00450596	12.7597	2.20177	73.9452
cg24995347	0.00450683	0.0819607	0.0145861	0.460545
cg14499563	0.00451131	15.8261	2.35317	106.438
cg24878755	0.00451216	11.4347	2.12765	61.4544
cg18267506	0.00451388	39.1102	3.11413	491.182
cg25613641	0.00451712	56.2127	3.48378	907.022
cg13885043	0.00451745	17.1051	2.4098	121.414
cg08728865	0.00452011	0.0386061	0.0040837	0.36497
cg18362496	0.0045208	147.21	4.69279	4617.9
cg22481882	0.00452207	3.32195e-05	2.69002e-08	0.0410232
cg01823238	0.0045239	85.6082	3.96658	1847.63
cg10573932	0.00452485	42.7835	3.1997	572.063
cg08485158	0.0045256	0.00861527	0.00032347	0.229458
cg06385187	0.00453027	16.8323	2.39635	118.233
cg19167683	0.00453485	11.0094	2.10084	57.6946
cg04839664	0.0045377	13.1056	2.21699	77.473
cg15323252	0.00453842	32.272	2.92983	355.476
cg15526941	0.00453886	0.00984689	0.000405016	0.239401
cg10164300	0.00454701	8.77062e+09	1188.47	6.4725e+16
cg02793739	0.00454896	8.86364e+08	584.585	1343929294389570
cg07876132	0.00455937	20.2104	2.53214	161.311
cg00151919	0.00456348	112.228	4.29972	2929.31
cg20786058	0.00456654	753917703091633	39447.1	1.4409e+25
cg05141333	0.00457062	0.0877579	0.0163285	0.471656
cg08225529	0.00457176	2.17141e+27	2.77101e+08	1.70155e+46
cg04617549	0.0045744	0.0749734	0.0125094	0.449343
cg14609729	0.00459497	518609	57.904	4.64486e+09
cg07537876	0.00459536	10.2309	2.04878	51.0892
cg12178578	0.00459549	8.06255	1.90365	34.1474
cg24727311	0.0046005	17.8012	2.42983	130.413
cg11139148	0.00460504	23.9341	2.66142	215.239
cg18449596	0.00460672	0.0278701	0.00234183	0.331682
cg15687395	0.00461307	13.9608	2.25315	86.5029
cg14105752	0.00461554	9.01744e+27	4.10049e+08	1.98304e+47
cg00499822	0.00461643	47.9579	3.29488	698.041
ch.14.1097636R	0.00461668	712.276	7.56542	67060.1
cg13554714	0.00461801	9605.77	16.8591	5.47306e+06
cg21127999	0.00462207	0.00787521	0.000275705	0.224947
cg00396687	0.00462352	15.6173	2.33122	104.624
cg00839579	0.00462383	8.20132	1.91177	35.183
cg07911961	0.00462721	405.453	6.35302	25876.2
cg11494773	0.00462901	52.996	3.39499	827.271
cg04917511	0.00464208	12.3701	2.16804	70.5803
cg04105683	0.0046475	144.251	4.6137	4510.1
cg03009871	0.00465	9.39428e+18	682998	1.29213e+32
cg26426447	0.00465072	18.228	2.44163	136.082
cg25320443	0.00465364	0.0206208	0.00140243	0.3032
cg12484193	0.00465373	5.44545e+24	4.02833e+07	7.36108e+41
cg08248955	0.00466085	19.1998	2.47969	148.66
cg20554488	0.00466482	1.65316e+07	165.171	1.65461e+12
cg18967533	0.00466612	0.0283	0.0023947	0.334443
cg23651808	0.00467059	35.0427	2.98161	411.855
cg03210589	0.0046729	58.4288	3.48805	978.749
cg27050793	0.00467541	0.0151372	0.000829802	0.276131
cg01309153	0.00468051	0.0130793	0.000647713	0.264112
cg06326914	0.00468148	35591.9	24.9573	5.07581e+07
cg23260991	0.00468486	12.5284	2.17258	72.2467
cg27493371	0.00470759	1851.61	10.0384	341537
cg22706420	0.00471529	20.8136	2.53494	170.894
cg15522171	0.00471612	16.1922	2.34714	111.705
cg03843721	0.00471635	0.00303215	5.43376e-05	0.169201
cg17589079	0.00472118	101.822	4.12141	2515.56
cg25303383	0.00472722	208.06	5.12719	8443.03
cg24482053	0.00472739	125.582	4.39269	3590.23
cg21872393	0.00472999	31.6286	2.8793	347.433
cg15460516	0.00473709	2.06858e+10	1436.11	2.97959e+17
cg06648271	0.00474372	1.26541e+21	2.85868e+06	5.60137e+35
cg00964221	0.00474516	91.2356	3.97795	2092.52
cg03317463	0.00474652	10.7206	2.06607	55.6284
cg15628956	0.0047489	30.5217	2.84501	327.441
cg25744613	0.00475154	49.7352	3.3027	748.96
cg16980360	0.00475397	22.8327	2.60265	200.308
cg06628878	0.00476316	36.577	3.00438	445.308
cg00927294	0.00476365	5340070819981130	64062	4.45137e+26
cg05059605	0.00476755	0.109284	0.0234901	0.508427
cg19772651	0.00477019	0.0171975	0.00102332	0.289015
cg07875082	0.00477863	0.0493513	0.00610411	0.399001
cg11599830	0.00478031	4.06371e-05	3.61929e-08	0.0456272
cg05708544	0.00478203	9.38891	1.98131	44.4917
cg18582180	0.00478841	8.02077	1.88788	34.0768
cg25119219	0.00479317	1.12868e+85	8.95342e+25	1.42283e+144
cg14878686	0.0048025	1.50567e+07	154.536	1.467e+12
cg21197774	0.00480281	983.562	8.17927	118274
cg16741308	0.00480356	8.41297	1.91457	36.9682
cg13043150	0.00480579	11.9799	2.13227	67.307
cg05681148	0.00480734	50.1924	3.30002	763.412
cg02820514	0.00482071	8.57972	1.92489	38.242
cg02075570	0.00482428	8.98757	1.95207	41.3798
cg06350404	0.00483232	12.5969	2.16279	73.3693
cg09342330	0.00483254	7.73818e+60	3.46303e+18	1.7291e+103
cg23599104	0.00483411	167.57	4.75521	5905.07
cg26709285	0.00484038	9.25067	1.96815	43.4799
cg12908399	0.00484429	23.4987	2.61333	211.298
cg25964007	0.00484474	2.61627e+50	2193650749865680	3.12032e+85
cg11487705	0.00484945	2.14062e+11	2797.7	1.63787e+19
cg23420005	0.00485254	2365.87	10.6222	526948
cg17703658	0.00485419	3.76918e+18	446206	3.18389e+31
cg20690420	0.00485454	11.3312	2.09232	61.3653
cg23089549	0.00485612	13.4651	2.20489	82.2298
cg15729771	0.00486358	1.33629e+26	8.74139e+07	2.04277e+44
cg05142617	0.00487056	9.42773	1.97735	44.9502
cg22848013	0.00487299	0.0386142	0.00400746	0.372071
cg26651830	0.00487355	4.93755e+09	881.038	2.76712e+16
cg06526320	0.00487439	7.15794e+06	120.911	4.23752e+11
cg10409786	0.00487538	6423.55	14.346	2.87621e+06
cg15488194	0.0048777	16568.1	19.1238	1.43538e+07
cg16391792	0.0048782	0.00182596	2.2634e-05	0.147305
cg17550582	0.00488276	40275.8	25.0249	6.48213e+07
cg11988964	0.00488505	7.24902	1.82474	28.7977
cg02855207	0.00488685	227.978	5.19808	9998.7
cg26188818	0.00488888	6.01628e+18	501967	7.21075e+31
cg20661893	0.00488926	31.6639	2.85433	351.256
cg22700017	0.00489051	3.01371e+23	1.33881e+07	6.78395e+39
cg12160258	0.00489547	9.93337	2.00712	49.1609
cg24537512	0.00489611	0.0138706	0.000704629	0.273043
cg18166947	0.00490123	116224	34.4041	3.92631e+08
cg00824109	0.00490636	5.31678e+70	2.81492e+21	1.00423e+120
cg13967888	0.00490764	84.2646	3.83675	1850.66
cg18434718	0.00490936	0.00924482	0.000353667	0.241659
cg19981751	0.00491604	2.2811e+07	169.981	3.06117e+12
cg02238826	0.0049181	13.9524	2.22294	87.5725
cg23684878	0.00491866	205.743	5.02478	8424.32
cg15114328	0.00492318	11.4539	2.09347	62.6667
cg00195124	0.00492772	5.24478e+37	2.66975e+11	1.03035e+64
cg09994773	0.00493062	97.7332	4.00638	2384.14
cg05265484	0.00493579	12.5042	2.14877	72.7654
cg03627015	0.00493605	12.1568	2.13049	69.368
cg14025652	0.004939	1679.36	9.47124	297768
cg15081566	0.00494063	17.9613	2.39726	134.574
cg27034902	0.0049493	13.7616	2.21075	85.6632
cg26944851	0.00495558	19.6612	2.46202	157.01
cg08440162	0.00495587	1.31361e+45	4.43875e+13	3.88751e+76
cg08548429	0.0049581	40.1696	3.05551	528.094
cg14094882	0.00495847	43.5305	3.1306	605.285
cg02244695	0.00496026	88.7413	3.88261	2028.28
cg08548086	0.00496779	2.0751e+22	5.57297e+06	7.72665e+37
cg16782935	0.00496984	70.3189	3.61643	1367.3
cg00008188	0.00498119	31.2648	2.82885	345.542
cg19973758	0.00498185	0.027585	0.00225088	0.338059
cg17031727	0.00498186	36.1921	2.95659	443.032
cg25214424	0.00498225	24.1537	2.61657	222.965
cg03731464	0.00498511	10.9585	2.06068	58.2763
cg01966966	0.00498572	104731	32.8128	3.3428e+08
cg26817935	0.00498859	8.47214	1.90637	37.6512
cg15692535	0.00499176	9.46167	1.97081	45.4247
cg16842060	0.00499794	4.33623e+47	238164975779197	7.89488e+80
cg00816008	0.00499846	15621.1	18.4343	1.32373e+07
cg11342670	0.00499939	30.027	2.79176	322.958
cg01203385	0.00500256	4.48987e+09	817.199	2.46683e+16
cg13519536	0.0050075	3405.04	11.6266	997221
cg11032208	0.00500837	16.4638	2.3278	116.443
cg15984661	0.00501011	8.24189	1.8892	35.9563
cg19605920	0.00501064	1.20633e+47	158345933287309	9.19025e+79
cg17094014	0.00501089	5.58492	1.67994	18.5669
cg19735538	0.00501334	6.63643	1.76953	24.8893
cg07097041	0.00501526	7.29686	1.82077	29.2427
cg27649089	0.00501978	108.598	4.10865	2870.4
cg10171063	0.0050247	7.23774	1.81577	28.85
cg26618989	0.00502739	1.42488e+09	573.187	3542097425648150
cg24990131	0.00502748	10.759	2.04598	56.5775
cg16559275	0.00504743	8.417	1.89881	37.3108
cg00948524	0.00504908	10.9499	2.05516	58.3412
cg00591844	0.0050541	9.60392	1.97525	46.6955
cg03123773	0.00505484	4e+19	790840	2.02316e+33
cg14440947	0.00505599	404.822	6.08773	26919.8
cg15819352	0.00505835	0.0323627	0.00293983	0.356262
cg08632680	0.00506051	9.36541	1.95991	44.7525
cg00883505	0.00506315	33.6479	2.87903	393.251
cg04571847	0.00508352	225.569	5.09342	9989.65
cg20346695	0.00508556	6.70192e+76	1.19911e+23	3.74575e+130
cg11396951	0.00508755	6.63803e+24	2.85658e+07	1.54252e+42
cg26342671	0.00508929	8.00014	1.86741	34.2732
cg08152926	0.00509282	30.4795	2.79017	332.954
cg23465910	0.00509439	2.88613e+29	7.0124e+08	1.18786e+50
cg19828169	0.0050956	1.2958e+51	2219533254676890	7.56515e+86
cg26299174	0.00509729	16.3136	2.31222	115.099
cg06341779	0.00509975	23.6711	2.5853	216.734
cg02876297	0.00511026	1.48225e+16	71037.1	3.09283e+27
cg01751134	0.00511099	8.09086	1.8724	34.9615
cg00993140	0.005111	0.15824	0.0435352	0.575167
cg15309264	0.0051198	13.5325	2.18403	83.8492
cg10887392	0.00512017	2151.77	9.98528	463692
cg05037270	0.00513697	1.06804e+10	1010.38	1.129e+17
cg13556491	0.00514136	28.7522	2.73467	302.299
cg25260137	0.00514348	8.38404	1.89045	37.1828
cg17329249	0.00514862	7.07347e+11	3530.87	1.41704e+20
cg08137852	0.00515063	0.0874997	0.0158764	0.482238
cg01857829	0.00515324	17.1887	2.3429	126.105
cg16004008	0.00515359	38.5419	2.98345	497.906
cg02056135	0.00515789	4718.23	12.5726	1.77065e+06
cg24678095	0.00516141	28.6482	2.72882	300.76
cg07158808	0.00517467	166.265	4.61338	5992.13
cg22877509	0.0051757	7.28368	1.81063	29.3003
cg01462829	0.00517631	59.7463	3.39681	1050.87
cg08008403	0.00517669	12.3749	2.12146	72.1852
cg20523092	0.00518126	4.18679e+09	751.535	2.33245e+16
cg02192520	0.00519264	11.1225	2.05362	60.2396
cg02902975	0.00519475	26.7301	2.66824	267.778
cg22213386	0.00519602	9.49208	1.95842	46.0064
cg03065467	0.00519637	2.22262e+06	78.6247	6.28307e+10
cg16636756	0.00519695	318.343	5.59105	18125.8
cg06259052	0.00519861	101980	31.3091	3.32167e+08
cg23047434	0.00519935	45.9865	3.13679	674.18
cg22711917	0.00520354	234.68	5.10156	10795.7
cg12436713	0.00520431	7.41141e+37	2.02096e+11	2.71797e+64
cg08961287	0.00520493	0.0272405	0.0021755	0.34109
cg08687825	0.00520874	25.6331	2.63319	249.528
cg00882832	0.00521056	505022	50.3607	5.06441e+09
cg03205208	0.00521208	292812	42.7873	2.00384e+09
cg23695504	0.00521281	76.8154	3.6528	1615.36
cg09417568	0.00521678	28.8175	2.7257	304.674
cg10482024	0.00522265	112.459	4.08988	3092.26
cg04754315	0.00522571	14.3448	2.21274	92.9946
cg01005439	0.00522777	20.5895	2.46429	172.028
cg08681924	0.00522818	39.6629	2.99628	525.033
cg09164670	0.00523081	62485.1	26.899	1.4515e+08
cg19340889	0.00523389	11.8051	2.08717	66.7699
cg15547276	0.00524103	16.3213	2.29805	115.918
cg02186748	0.00524255	0.0772985	0.0128116	0.46638
cg01575392	0.00524726	1.97775e+19	559401	6.9923e+32
cg12060713	0.00524934	3.94551e+23	1.06606e+07	1.46025e+40
cg17162475	0.00525097	11.6826	2.07934	65.6377
cg10552126	0.00525458	14.4465	2.21475	94.2325
cg10724791	0.00525648	15.6017	2.26589	107.426
cg15671915	0.0052579	0.0591462	0.00811813	0.430921
cg00004818	0.00526189	451.389	6.16745	33036.7
cg01181415	0.00526207	15.2555	2.25027	103.424
cg08359347	0.00526841	18.4752	2.38156	143.323
cg19404813	0.00527286	15.0146	2.23862	100.705
cg20611453	0.0052733	0.0246327	0.00182597	0.3323
cg21122375	0.00528496	1.88415e+06	73.3666	4.83872e+10
cg05575601	0.00529136	4104.13	11.8522	1.42115e+06
cg25741646	0.00530055	10.299	1.99915	53.0576
cg23761616	0.0053036	6.98363	1.78111	27.3824
cg15597770	0.00530416	0.047948	0.00566679	0.405698
cg15003158	0.00530593	17.0831	2.32287	125.635
cg14686113	0.00530848	11.0543	2.04102	59.8708
cg15814001	0.00531165	6.46352e-05	7.32318e-08	0.0570477
cg05655116	0.00531712	1.40345e+21	1.88917e+06	1.04261e+36
cg10472263	0.0053229	0.00946649	0.000357145	0.250919
cg10815165	0.00532448	13.7146	2.17458	86.4947
[truncated: 9,350 more rows]
