# Supplementary material for: Integrative analysis of DNA methylation and gene expression to identify key epigenetic genes in glioblastoma
Source: Aging (Albany NY). 2019 Aug 8;11(15):5579–92. doi: 10.18632/aging.102139 (PMC6710056; doi:10.18632/aging.102139)
Supplement: Supplementary Table 7 [file aging-11-102139-s006.xlsx]

## Sheet: up_exp_gene_info
gene	FC(tumor/normal)	regulation
H19	2.35932	up
POU5F1B	2.22269	up
DPYSL3	1.16365	up
IGFBP5	1.15649	up
PHLDA1	1.18142	up
GSDMD	1.27123	up
LPAR6	1.21155	up
SRI	1.12657	up
LGALS1	1.19147	up
LOX	1.75638	up
ALPP	Inf	up
UPP1	1.29504	up
BCAT1	1.08752	up
C8orf48	1.48071	up
LIMD1	1.28702	up
IFITM4P	Inf	up
SLC22A18	1.21294	up
C4orf52	1.11441	up
ERBB2	1.14594	up
FKBP10	1.34369	up
PDPN	1.49335	up
SNRPF	1.14859	up
FAM72B	1.41114	up
H2AFV	1.05606	up
SNORA71D	Inf	up
SAA2	8.65517	up
XRN2	1.17337	up
CCDC50	1.10701	up
LOC282997	1.45256	up
STAG3L4	1.14162	up
E2F8	9.11967	up
GNG11	1.20317	up
NEUROG1	Inf	up
COPZ1	1.11075	up
EVC2	1.80754	up
BMF	1.41246	up
XRCC2	1.71656	up
MRPS23	1.07109	up
ZNF284	1.14076	up
SPATA12	3.37939	up
EXOC3L	1.30536	up
RIN3	1.17196	up
LAMA2	1.19825	up
HMGN4	1.16252	up
WDR38	5.29087	up
C10orf11	1.35649	up
MBD2	1.16209	up
SRA1	1.12099	up
FLJ45983	Inf	up
INMT	1.76392	up
DMRTB1	Inf	up
SND1	1.05433	up
PRCP	1.20503	up
ROR1	1.27916	up
SNRPD2	1.12465	up
TNFRSF19	1.66269	up
S100A6	1.24126	up
TICAM2	1.13916	up
CRCP	1.06834	up
VIM	1.28715	up
TMEM106A	1.38165	up
KARS	1.08063	up
FIGLA	Inf	up
TBCA	1.12877	up
TMEM51	1.20232	up
SC65	1.27097	up
WFDC5	Inf	up
FRRS1	5.03599	up
WDR78	1.36496	up
TIMM8B	1.20618	up
GLB1	1.17473	up
CCT6A	1.09464	up
F2R	1.81818	up
SLC30A5	1.12694	up
CCT6P1	1.15045	up
HOXC11	Inf	up
RUVBL1	1.17371	up
EIF4EBP1	1.56923	up
MEOX2	2.86762	up
MRPS14	1.14842	up
LOXL3	1.37908	up
HOXC9	25.108	up
HOXC5	Inf	up
HOXC6	9.88813	up
FZD7	1.39816	up
HIST1H1D	4.54291	up
HIST1H1B	5.19088	up
BCL2L14	2.17512	up
ATF5	1.10838	up
LHX9	7.03278	up
ING3	1.18864	up
PLSCR2	Inf	up
NPNT	1.29228	up
ERH	1.10619	up
CELP	Inf	up
MTTP	1.68196	up
ADAMTSL4	1.36793	up
STK33	1.41101	up
S1PR3	1.3695	up
ENY2	1.11653	up
ARSB	1.05125	up
HIST1H3B	Inf	up
HIST1H3F	Inf	up
HIST1H3G	Inf	up
HIST1H3I	Inf	up
SNORA14B	Inf	up
ZNF645	Inf	up
CTSZ	1.14318	up
PSMB8	1.31272	up
FAM162A	1.0564	up
IL4	Inf	up
GNS	1.12636	up
CYCSP52	Inf	up
HIBADH	1.16543	up
INADL	1.12148	up
NUP205	1.20634	up
ZNF217	1.33094	up
TLX1	11.4302	up
HIST1H2BH	Inf	up
HIST1H2BJ	1.37329	up
DGUOK	1.10201	up
AWAT2	Inf	up
MOBKL1B	1.23726	up
CEP70	1.0401	up
CHCHD3	1.14842	up
SLC39A8	1.20152	up
CA3	2.24301	up
PLA2G12B	Inf	up
ZNF180	1.06439	up
VRK1	1.05651	up
FBXO4	1.32812	up
SNTB1	1.20674	up
CORO1C	1.09225	up
FAP	1.38609	up
TMEM95	Inf	up
FSTL1	1.29868	up
ANKRD53	1.82376	up
PAK1IP1	1.09927	up
MGAT2	1.12533	up
RSL24D1	1.06137	up
C1QTNF1	1.33343	up
CCT7	1.02853	up
ITGB5	1.09991	up
USP39	1.12683	up
EXT2	1.11094	up
SNCAIP	1.40615	up
ZNF530	1.28487	up
C1QBP	1.07421	up
ATP5F1	1.04896	up
PRUNE	1.02925	up
PSME2	1.10716	up
NOP10	1.18773	up
EXOC3L2	4.3044	up
MAML2	1.33692	up
ANTXR2	1.46665	up
GNB2L1	1.16091	up
COL8A1	2.06403	up
HSPA7	1.37874	up
PPIC	1.53669	up
LOC731779	Inf	up
MRPL36	1.19663	up
MRPL30	1.01854	up
SOX9	1.12765	up
SHOX2	12.3683	up
PTAFR	1.13229	up
SFRP4	1.58815	up
PSMA5	1.08472	up
COL6A2	1.28169	up
KLK13	Inf	up
SOCS2	1.32233	up
C16orf63	1.07114	up
NOTCH3	1.14039	up
SIAH1	1.04563	up
EMILIN2	1.37302	up
SDHD	1.09853	up
CD3EAP	1.05202	up
RPA2	1.08282	up
DSE	1.23031	up
RNF135	1.33479	up
EIF3M	1.08726	up
NME2	1.10917	up
UBTD2	1.18924	up
CD40	1.2094	up
C8orf59	1.15969	up
DNAJB9	1.06421	up
CALU	1.22387	up
TP53I3	1.42941	up
NACA	1.04112	up
TEKT3	1.53308	up
ZBTB9	1.12082	up
AEBP1	1.29094	up
C3orf21	1.1128	up
C3orf24	Inf	up
RPL35A	1.11701	up
WTAP	1.09584	up
METTL4	1.09863	up
MMP14	1.45078	up
TCN2	1.16919	up
WDR93	1.90251	up
SCLT1	1.09113	up
C1orf61	1.10851	up
ST7OT1	1.31452	up
TMEM216	1.20635	up
MCM2	1.33188	up
CCDC40	1.2224	up
BBOX1	1.18542	up
CALD1	1.25104	up
FLJ25758	Inf	up
ADPGK	1.11382	up
CASP1	1.46908	up
AKT1	1.06706	up
TLX1NB	Inf	up
EFEMP1	1.32861	up
EFEMP2	1.23723	up
OSTC	1.27191	up
RBM12	1.07127	up
MRPS33	1.11825	up
NGLY1	1.10737	up
GATA4	46.5886	up
PDLIM2	1.12359	up
IL17B	7.80744	up
RBPMS	1.24405	up
MAB21L1	1.35677	up
ATP4B	Inf	up
METTL7B	1.9485	up
CNOT6	1.06473	up
DDAH2	1.09539	up
GALNT5	7.58593	up
DGAT2L6	Inf	up
ASCL1	1.27106	up
IGF2BP3	2.5895	up
MRPS15	1.05262	up
NLRP11	7.82904	up
CD248	1.49684	up
FOXD3	12.1549	up
PCDHB7	1.11388	up
MS4A10	Inf	up
PON2	1.14194	up
PLK4	1.42524	up
WIT1	Inf	up
EHD2	1.14724	up
CD58	1.54832	up
UGT1A6	Inf	up
TSGA13	Inf	up
HIST1H4L	Inf	up
APOA4	Inf	up
RRAS	1.21334	up
SLC40A1	1.3197	up
CHI3L1	1.51738	up
TBL2	1.14171	up
HMHB1	Inf	up
PITX1	20.5686	up
CAMP	Inf	up
ORMDL1	1.09143	up
FOXJ1	1.69635	up
GALM	1.27903	up
TAPBP	1.03085	up
EYA2	1.15456	up
HPD	12.1723	up
C6orf15	Inf	up
ZNF79	1.09048	up
ARPC1B	1.17512	up
ADAM9	1.2068	up
RPL5	1.10159	up
ADK	1.09955	up
PPIL1	1.09753	up
HIST1H2AM	3.23326	up
HIST1H2AL	15.0539	up
HIST1H2AJ	Inf	up
CPXCR1	Inf	up
TGIF2	1.3727	up
MOV10	1.199	up
C6orf153	1.06276	up
HOXB6	13.2499	up
HOXB5	21.2763	up
APOBEC3D	1.53495	up
NUP35	1.22842	up
FUCA1	1.11336	up
CEACAM8	Inf	up
TMEM154	1.78512	up
SNORA71B	Inf	up
CLU	1.04967	up
SF3B3	1.03658	up
CNIH4	1.09514	up
TCF7L1	1.30125	up
ACTG1	1.0533	up
MAP3K1	1.23757	up
EVX2	Inf	up
IKBIP	1.54312	up
NOX4	3.1221	up
GBGT1	1.1876	up
C12orf74	Inf	up
ZNF167	1.20084	up
HOXC13	46.9095	up
CENPK	3.53573	up
CENPE	1.71273	up
RAMP1	1.1245	up
RPL41	1.14644	up
ZBTB8OS	1.08808	up
EZH2	2.11042	up
RB1	1.12858	up
GSC	17.9071	up
PGGT1B	1.18348	up
RPS3A	1.16771	up
ANG	1.7763	up
MDFI	1.67159	up
SNORA24	Inf	up
ZCCHC9	1.23461	up
NDUFA4L2	1.1734	up
DARS	1.12388	up
SLC2A10	1.37701	up
KDELR1	1.11368	up
LOC645323	1.14431	up
PLCG2	1.10445	up
PSMD5	1.07455	up
ZMYND10	1.37658	up
NCK1	1.18506	up
DKK1	1.22062	up
TFDP1	1.11959	up
MTHFS	1.21998	up
NUSAP1	2.33539	up
ZNF772	1.04967	up
COL18A1	1.09704	up
SLC2A2	Inf	up

## Sheet: down_exp_gene_info
gene	FC(tumor/normal)	regulation
NACAP1	0.335905	down
STXBP6	0.500705	down
PCDHA6	0.548258	down
LRRC24	0.816543	down
SEC61A2	0.781225	down
GRIN2C	0.562643	down
TPPP	0.617677	down
NCRNA00219	0.904543	down
SLC17A7	0.475387	down
CDK17	0.876392	down
LRRC4B	0.895679	down
CES8	0.490632	down
ANKS1B	0.618975	down
DUSP26	0.647291	down
ELAVL3	0.731361	down
S100A1	0.739052	down
KIAA0232	0.879174	down
FLJ35390	0.676672	down
ADCY5	0.611877	down
HS3ST4	0.429961	down
MLLT6	0.922772	down
PCDHA3	0.69757	down
PCDHA7	0.673646	down
NECAB1	0.677781	down
MAP1LC3A	0.836084	down
AGPAT3	0.922007	down
APC2	0.90721	down
USP6	0.833955	down
PAQR5	0.856383	down
PC	0.853586	down
MARK2	0.901775	down
ZMYND11	0.901764	down
TMEM180	0.821022	down
HEPH	0.916502	down
TMEM57	0.94307	down
PPP2R2C	0.556813	down
SYT15	0.543137	down
RUFY3	0.888272	down
CYP11A1	0.635534	down
THRA	0.904127	down
TRIM23	0.868292	down
FLRT1	0.670638	down
NTSR2	0.612601	down
RALGAPA1	0.861031	down
HIST4H4	0.702729	down
B3GALT2	0.675531	down
HCN2	0.694935	down
NCOA7	0.753876	down
AK5	0.522665	down
TMEM55B	0.913747	down
PDE1A	0.561213	down
FEZF2	0.375518	down
KIAA1109	0.845689	down
USP20	0.887519	down
KIAA0195	0.953553	down
PENK	0.54305	down
NT5C2	0.95601	down
LDB1	0.899322	down
BRSK2	0.694714	down
BRSK1	0.755466	down
ARID4A	0.93331	down
FAM190B	0.868421	down
WWP1	0.921828	down
NLGN2	0.908316	down
EID3	0.907783	down
MYOM1	0.725441	down
NAV3	0.681474	down
GFRA1	0.617474	down
PPAPDC3	0.89007	down
PVRL3	0.912371	down
RPS6KL1	0.719393	down
FAM50B	0.762363	down
HMOX2	0.906122	down
CHAD	0.466583	down
FABP6	0.284845	down
ASPDH	0.376569	down
SERPINI1	0.612286	down
FAM19A5	0.833001	down
PABPC5	0.717704	down
CCDC108	0.628788	down
TRAPPC9	0.928101	down
TACR1	0.80677	down
PRNP	0.861049	down
TMEM52	0.409796	down
BMP8A	0.833844	down
SLC22A17	0.852579	down
AIFM3	0.484301	down
SDHA	0.936548	down
DLG2	0.647153	down
RAB11FIP4	0.643728	down
PRDM2	0.855581	down
EIF3A	0.958527	down
SCOC	0.934406	down
PCDHGB6	0.746928	down
ARHGDIG	0.470396	down
RASGRF1	0.454418	down
FAM131B	0.848073	down
FAM131C	0.490848	down
PNPLA7	0.73818	down
SPTB	0.498543	down
ATP8A1	0.671502	down
NTNG2	0.669132	down
PPP1R1B	0.708276	down
SHISA7	0.578706	down
CDC42BPB	0.874843	down
TCP10L	0.72338	down
TPD52	0.876615	down
PCDHGB1	0.906402	down
PCDHGB5	0.557238	down
PCDHGB4	0.470513	down
SYT11	0.920994	down
PCDHGA7	0.722504	down
PCDHGA4	0.839626	down
KBTBD11	0.799295	down
PDE6C	0.453875	down
NBAS	0.957143	down
DRD5	0.125152	down
TMEFF2	0.63031	down
KIAA2018	0.903439	down
CEP290	0.934258	down
FTO	0.933354	down
KLHL26	0.760768	down
CCNDBP1	0.922864	down
PPFIA2	0.535091	down
RTN4	0.9014	down
KIF1A	0.732877	down
SELM	0.828559	down
RASAL1	0.29007	down
PCDHGA3	0.550011	down
LY6H	0.597294	down
ATG9A	0.943441	down
AARS	0.914976	down
C5orf53	0.836039	down
GIT1	0.862158	down
ADARB2	0.418229	down
YOD1	0.945789	down
PSD2	0.850337	down
PHACTR3	0.681393	down
PLIN5	0.687035	down
ZSCAN18	0.904908	down
ANO8	0.933257	down
SNCA	0.626926	down
MAST3	0.677814	down
ZFYVE1	0.965909	down
LRRC8B	0.761175	down
CRTAC1	0.629564	down
LOC100302640	0.737656	down
ANKH	0.889844	down
TNRC6C	0.862393	down
SUPT6H	0.968405	down
CNNM4	0.931185	down
FBRSL1	0.885885	down
C10orf137	0.932126	down
KIAA1632	0.934882	down
KIAA0664	0.922253	down
KLHL2	0.793898	down
ZFYVE21	0.92699	down
ABCA3	0.8782	down
ZNF706	0.932921	down
ATP2C2	0.533322	down
CHGA	0.408765	down
KIAA1244	0.594309	down

## Sheet: up_methy_gene_info
gene	diff_methy(tumor-normal)	regulation
H19	0.0207725	up
STXBP6	0.0337788	up
DPYSL3	0.000526087	up
PCDHA6	0.192383	up
LRRC24	0.0762096	up
SEC61A2	0.0149522	up
GRIN2C	0.000755435	up
TPPP	0.00656783	up
UPP1	0.00507011	up
BCAT1	0.0154156	up
C8orf48	0.0231261	up
SLC17A7	0.0151658	up
CDK17	0.026523	up
LRRC4B	0.0124674	up
CES8	0.0582245	up
SNRPF	0.022894	up
H2AFV	0.00886348	up
DUSP26	0.00671643	up
ELAVL3	0.0628323	up
CCDC50	0.0236822	up
S100A1	0.113555	up
E2F8	0.000267893	up
NEUROG1	0.112287	up
COPZ1	0.018738	up
EVC2	0.0106791	up
ADCY5	0.221733	up
XRCC2	0.0197783	up
HS3ST4	0.219599	up
PCDHA3	0.198912	up
PCDHA7	0.188295	up
EXOC3L	0.0690118	up
NECAB1	0.174708	up
RIN3	0.0576201	up
HMGN4	0.00599746	up
AGPAT3	0.00328478	up
APC2	0.0651598	up
SRA1	0.0068837	up
FLJ45983	0.0157886	up
SND1	0.028504	up
PAQR5	0.0207233	up
MARK2	0.0133222	up
TICAM2	0.0252609	up
FIGLA	0.165737	up
TMEM57	0.00279699	up
WDR78	0.0245858	up
SYT15	0.175067	up
RUFY3	0.0179158	up
FLRT1	0.0898127	up
F2R	0.0675438	up
NTSR2	0.0686272	up
HOXC11	0.250072	up
HIST4H4	0.0253527	up
HOXC9	0.139609	up
HOXC5	0.121357	up
HOXC6	0.166115	up
HIST1H1B	0.00600109	up
LHX9	0.0584167	up
B3GALT2	0.0565674	up
HCN2	0.0364728	up
NCOA7	0.0564033	up
AK5	0.0279212	up
NPNT	0.00371739	up
ERH	0.00207341	up
PDE1A	0.0293302	up
FEZF2	0.0320692	up
ADAMTSL4	0.00709543	up
S1PR3	0.00212319	up
KIAA1109	0.0182978	up
ARSB	0.0162342	up
HIST1H3B	0.00440692	up
HIST1H3G	0.0230904	up
HIST1H3I	0.0384961	up
SNORA14B	0.00600342	up
CTSZ	0.0140078	up
USP20	0.0287471	up
PENK	0.24558	up
LDB1	0.0183804	up
INADL	0.00170109	up
ARID4A	0.00608438	up
TLX1	0.00392562	up
DGUOK	0.0150745	up
MOBKL1B	0.000473551	up
WWP1	0.0347095	up
CA3	0.0619097	up
NLGN2	0.0355338	up
EID3	0.0276817	up
PLA2G12B	0.0448196	up
MYOM1	0.0147321	up
FBXO4	0.00684032	up
CORO1C	0.00622609	up
TMEM95	0.0771522	up
FSTL1	0.0615039	up
GFRA1	0.066757	up
MGAT2	0.00922408	up
PPAPDC3	0.0967913	up
RPS6KL1	0.19671	up
FAM50B	0.142929	up
HMOX2	0.0175918	up
ITGB5	0.0278	up
USP39	0.0400164	up
EXT2	0.0238106	up
CHAD	0.054613	up
ASPDH	0.0541362	up
NOP10	0.00249457	up
EXOC3L2	0.23118	up
PABPC5	0.303429	up
CCDC108	0.107268	up
COL8A1	0.058475	up
TRAPPC9	0.000141522	up
TACR1	0.0173819	up
TMEM52	0.0840248	up
MRPL36	0.0683211	up
MRPL30	0.00392809	up
BMP8A	0.138482	up
COL6A2	0.0739967	up
KLK13	0.012086	up
SOCS2	0.0282167	up
AIFM3	0.0291095	up
SIAH1	0.0426304	up
EMILIN2	0.0275188	up
SDHA	0.0155678	up
DLG2	0.0695433	up
RPA2	0.0558759	up
PRDM2	0.0633562	up
DSE	0.0110312	up
RNF135	0.121156	up
CD40	0.134122	up
PCDHGB6	0.203797	up
FAM131B	0.0381975	up
FAM131C	0.0258003	up
TEKT3	0.0253652	up
C3orf24	0.0614113	up
SPTB	0.00408116	up
RPL35A	0.0107634	up
WTAP	0.00477688	up
ATP8A1	0.00896812	up
METTL4	0.00413913	up
TCN2	0.00426329	up
SHISA7	0.0646104	up
TMEM216	0.0895047	up
CDC42BPB	0.0640622	up
CALD1	0.0348741	up
TPD52	0.0227591	up
PCDHGB1	0.257033	up
PCDHGB5	0.225907	up
PCDHGB4	0.242106	up
SYT11	0.000993789	up
PCDHGA7	0.245009	up
PCDHGA4	0.260834	up
KBTBD11	0.012213	up
ADPGK	0.00170916	up
DRD5	0.265509	up
AKT1	0.0021646	up
EFEMP2	0.0112255	up
TMEFF2	0.00882236	up
RBM12	0.00787893	up
NGLY1	0.00711372	up
GATA4	0.115321	up
FTO	0.00415936	up
KLHL26	0.0562437	up
CCNDBP1	0.00828098	up
PPFIA2	0.0312686	up
RTN4	0.014539	up
CNOT6	0.00846801	up
KIF1A	0.000842609	up
FOXD3	0.20014	up
SELM	0.00740145	up
RASAL1	0.0617606	up
PCDHB7	0.153804	up
PCDHGA3	0.258211	up
LY6H	0.0589196	up
PLK4	0.00873975	up
WIT1	0.160965	up
AARS	0.00110421	up
C5orf53	0.0164717	up
HIST1H4L	0.0766743	up
ADARB2	0.0261874	up
SLC40A1	0.0579659	up
TBL2	0.00203397	up
YOD1	0.0111795	up
PITX1	0.0439823	up
ORMDL1	0.00148551	up
PHACTR3	0.00241486	up
TAPBP	0.0515446	up
EYA2	0.00360559	up
PLIN5	0.00544674	up
ARPC1B	0.0080394	up
ADK	0.00220385	up
PPIL1	0.0122445	up
HIST1H2AM	0.00655435	up
HIST1H2AL	0.0932263	up
HIST1H2AJ	0.164945	up
TGIF2	0.0149491	up
ZSCAN18	0.116747	up
C6orf153	0.0145376	up
ANO8	0.0370624	up
HOXB6	0.428313	up
HOXB5	0.166776	up
NUP35	0.00663261	up
SNCA	0.250835	up
ACTG1	0.0711009	up
MAP3K1	0.018097	up
EVX2	0.319231	up
MAST3	0.0666453	up
ZFYVE1	0.0048787	up
LRRC8B	0.04483	up
ZNF167	0.108386	up
CRTAC1	0.0359068	up
HOXC13	0.0723379	up
LOC100302640	0.00586522	up
ANKH	0.0125234	up
CENPK	0.00110043	up
RPL41	0.00170888	up
FBRSL1	0.0878225	up
GSC	0.0644128	up
PGGT1B	0.0311306	up
C10orf137	0.00169752	up
ANG	0.0244488	up
MDFI	0.0428217	up
SNORA24	0.00497778	up
NDUFA4L2	0.0230178	up
KIAA0664	0.0376226	up
KLHL2	0.138828	up
KDELR1	0.0134142	up
ZFYVE21	0.0154413	up
PLCG2	0.229511	up
ABCA3	0.00705707	up
ZMYND10	0.0180329	up
NCK1	0.00833457	up
DKK1	0.0862224	up
TFDP1	0.0369327	up
MTHFS	0.0287791	up
ATP2C2	0.0421746	up
CHGA	0.0525886	up
ZNF772	0.0240648	up
KIAA1244	0.0268712	up
SLC2A2	0.0876879	up

## Sheet: down_methy_gene_info
gene	diff_methy(tumor-normal)	regulation
NACAP1	-0.0360319	down
POU5F1B	-0.0794362	down
IGFBP5	-0.0311708	down
PHLDA1	-0.000346739	down
GSDMD	-0.0556851	down
LPAR6	-0.0729226	down
SRI	-0.00646609	down
LGALS1	-0.0293478	down
LOX	-0.056744	down
ALPP	-0.0854964	down
NCRNA00219	-0.0131542	down
LIMD1	-0.160764	down
IFITM4P	-0.0203283	down
SLC22A18	-0.0569381	down
C4orf52	-0.000228261	down
ERBB2	-0.0170488	down
FKBP10	-0.0234624	down
PDPN	-0.0286127	down
FAM72B	-0.0105109	down
SNORA71D	-0.00960902	down
SAA2	-0.147507	down
ANKS1B	-0.0143104	down
XRN2	-0.00126359	down
LOC282997	-0.0171656	down
STAG3L4	-0.0061753	down
GNG11	-0.0386334	down
KIAA0232	-0.00560609	down
BMF	-0.0259431	down
FLJ35390	-0.0240135	down
MRPS23	-0.0157013	down
MLLT6	-0.0231982	down
ZNF284	-0.00176621	down
SPATA12	-0.215991	down
LAMA2	-0.0793217	down
MAP1LC3A	-0.0646783	down
WDR38	-0.0271255	down
C10orf11	-0.19111	down
MBD2	-0.000649565	down
USP6	-0.161426	down
INMT	-0.0885587	down
DMRTB1	-0.0293258	down
PRCP	-0.00290909	down
ROR1	-0.00275957	down
SNRPD2	-0.00998773	down
TNFRSF19	-0.0261616	down
PC	-0.0090437	down
S100A6	-0.0319604	down
ZMYND11	-0.0282457	down
CRCP	-0.0233665	down
VIM	-0.0473647	down
TMEM106A	-0.158923	down
TMEM180	-0.00528168	down
KARS	-0.00886401	down
HEPH	-0.1283	down
TBCA	-0.00567799	down
TMEM51	-0.0148199	down
SC65	-0.0234624	down
WFDC5	-0.0935826	down
PPP2R2C	-0.0308374	down
FRRS1	-0.0733951	down
TIMM8B	-0.0121886	down
GLB1	-0.00843668	down
CCT6A	-0.00511316	down
CYP11A1	-0.0253516	down
THRA	-0.00722246	down
TRIM23	-0.00449115	down
SLC30A5	-0.0108938	down
CCT6P1	-0.0117557	down
RALGAPA1	-0.0052785	down
RUVBL1	-0.00462708	down
EIF4EBP1	-0.0107935	down
MEOX2	-0.0212907	down
MRPS14	-0.0317882	down
LOXL3	-0.0394692	down
FZD7	-0.00380815	down
HIST1H1D	-0.0160522	down
BCL2L14	-0.0973457	down
ATF5	-0.0235179	down
ING3	-0.00257029	down
PLSCR2	-0.0915212	down
CELP	-0.230039	down
TMEM55B	-0.00107154	down
MTTP	-0.00608333	down
STK33	-0.0112172	down
ENY2	-0.00371054	down
HIST1H3F	-0.0170016	down
ZNF645	-0.0278678	down
KIAA0195	-0.000210652	down
PSMB8	-0.021775	down
FAM162A	-0.00281159	down
IL4	-0.0464457	down
GNS	-0.00573496	down
NT5C2	-0.019044	down
CYCSP52	-0.0222996	down
HIBADH	-0.00550531	down
BRSK2	-0.0147791	down
BRSK1	-0.000886025	down
NUP205	-0.00409928	down
ZNF217	-0.332127	down
HIST1H2BH	-0.0170016	down
HIST1H2BJ	-0.0126087	down
AWAT2	-0.129403	down
FAM190B	-0.00319845	down
CEP70	-0.00155489	down
CHCHD3	-0.00383207	down
SLC39A8	-7.93478e-05	down
ZNF180	-0.0011288	down
VRK1	-0.0026529	down
NAV3	-0.0430663	down
SNTB1	-0.00144293	down
FAP	-0.244136	down
ANKRD53	-0.0313187	down
PAK1IP1	-0.00399217	down
RSL24D1	-0.00733575	down
C1QTNF1	-0.00565018	down
PVRL3	-0.00630043	down
CCT7	-0.00486149	down
FABP6	-0.0861245	down
SNCAIP	-0.00603889	down
ZNF530	-0.0226872	down
C1QBP	-0.0142034	down
ATP5F1	-0.00419837	down
PRUNE	-0.0194861	down
PSME2	-0.011253	down
MAML2	-0.0173469	down
ANTXR2	-0.0797596	down
SERPINI1	-0.00242274	down
GNB2L1	-0.038761	down
FAM19A5	-0.00643682	down
HSPA7	-0.000927536	down
PPIC	-0.0114612	down
LOC731779	-0.157788	down
PRNP	-0.00496398	down
SOX9	-0.0869908	down
SHOX2	-0.0544931	down
PTAFR	-0.0544772	down
SFRP4	-0.01743	down
SLC22A17	-0.0039837	down
PSMA5	-0.000204545	down
C16orf63	-0.00332522	down
NOTCH3	-0.0286293	down
SDHD	-0.0107641	down
CD3EAP	-0.0145897	down
RAB11FIP4	-0.0140377	down
EIF3M	-0.0216605	down
EIF3A	-0.0225205	down
NME2	-0.00489425	down
UBTD2	-0.000536413	down
SCOC	-0.0264796	down
C8orf59	-0.00286286	down
ARHGDIG	-0.0456877	down
DNAJB9	-0.0103314	down
CALU	-0.00453659	down
RASGRF1	-0.0022205	down
TP53I3	-0.105874	down
NACA	-0.0214868	down
PNPLA7	-0.00359783	down
ZBTB9	-0.0068058	down
AEBP1	-0.041753	down
C3orf21	-0.0452176	down
NTNG2	-0.0622198	down
MMP14	-0.097712	down
PPP1R1B	-0.012047	down
WDR93	-0.00623159	down
SCLT1	-0.0331606	down
C1orf61	-0.14551	down
ST7OT1	-0.0212061	down
MCM2	-0.0168312	down
CCDC40	-0.021657	down
BBOX1	-0.183561	down
TCP10L	-0.138173	down
FLJ25758	-0.179827	down
PDE6C	-0.101728	down
NBAS	-0.00119396	down
CASP1	-0.191143	down
TLX1NB	-0.0258587	down
EFEMP1	-0.00857572	down
OSTC	-0.000638199	down
MRPS33	-0.00150202	down
KIAA2018	-0.0110239	down
CEP290	-0.00429632	down
PDLIM2	-0.0623493	down
IL17B	-0.0488866	down
RBPMS	-0.00488882	down
MAB21L1	-0.125224	down
ATP4B	-0.133651	down
METTL7B	-0.0508339	down
DDAH2	-0.00625746	down
GALNT5	-0.0307551	down
DGAT2L6	-0.0527842	down
ASCL1	-0.00538551	down
IGF2BP3	-0.0673335	down
MRPS15	-0.00652038	down
NLRP11	-0.0974413	down
CD248	-0.160246	down
MS4A10	-0.0721755	down
PON2	-0.00106033	down
ATG9A	-0.00246268	down
EHD2	-0.0118986	down
CD58	-0.044158	down
UGT1A6	-0.120086	down
TSGA13	-0.0180887	down
APOA4	-0.0599535	down
GIT1	-0.0680365	down
RRAS	-0.00177729	down
CHI3L1	-0.358855	down
HMHB1	-0.155396	down
CAMP	-0.066471	down
PSD2	-0.0109636	down
FOXJ1	-0.0636904	down
GALM	-0.0515595	down
HPD	-0.302895	down
C6orf15	-0.107199	down
ZNF79	-0.00265543	down
ADAM9	-0.00150041	down
RPL5	-0.01965	down
CPXCR1	-0.122093	down
MOV10	-0.0185179	down
APOBEC3D	-0.0473815	down
FUCA1	-0.00105455	down
CEACAM8	-0.201313	down
TMEM154	-0.0535561	down
SNORA71B	-0.145682	down
CLU	-0.0339554	down
SF3B3	-0.00510507	down
CNIH4	-0.0115217	down
TCF7L1	-0.00641377	down
IKBIP	-0.00502708	down
NOX4	-0.0701253	down
GBGT1	-0.0399949	down
C12orf74	-0.0115609	down
TNRC6C	-0.00516522	down
CENPE	-0.00208822	down
RAMP1	-0.0344742	down
SUPT6H	-0.00417952	down
CNNM4	-0.0179306	down
ZBTB8OS	-0.0118332	down
EZH2	-0.00546685	down
RB1	-0.00497853	down
RPS3A	-0.0217448	down
KIAA1632	-0.00800217	down
ZCCHC9	-0.00124402	down
DARS	-3.91304e-06	down
SLC2A10	-0.00620272	down
LOC645323	-0.0113935	down
PSMD5	-0.0134661	down
ZNF706	-0.00405535	down
NUSAP1	-0.00425686	down
COL18A1	-0.00380664	down
