# Supplementary material for: Integrative analysis of DNA methylation and gene expression to identify key epigenetic genes in glioblastoma
Source: Aging (Albany NY). 2019 Aug 8;11(15):5579–92. doi: 10.18632/aging.102139 (PMC6710056; doi:10.18632/aging.102139)
Supplement: Supplementary Table 8 [file aging-11-102139-s005.xlsx]

## Sheet: Sheet2
Gene Symbol	correlation	Pvalue	gene_Type
STXBP6	0.05566	0.800852	ES
PCDHA6	0.178786	0.414375	ES
LRRC24	0.241289	0.26737	ES
SEC61A2	0.372317	0.0802008	ES
GRIN2C	-0.00517832	0.981292	ES
TPPP	-0.256931	0.236619	ES
SLC17A7	0.105688	0.631267	ES
CDK17	0.020808	0.924921	ES
LRRC4B	-0.467418	0.0245187	ES
CES8	-0.752593	3.42834e-05	ES
DUSP26	0.108903	0.62086	ES
ELAVL3	-0.24313	0.263626	ES
S100A1	-0.527633	0.00966759	ES
ADCY5	0.047206	0.830636	ES
HS3ST4	0.291472	0.177204	ES
PCDHA3	0.172507	0.431221	ES
PCDHA7	-0.448468	0.0318468	ES
NECAB1	-0.0326043	0.882592	ES
AGPAT3	-0.369744	0.0824773	ES
APC2	0.226428	0.298841	ES
PAQR5	0.0733459	0.739446	ES
MARK2	0.0779964	0.723536	ES
TMEM57	-0.177758	0.417108	ES
SYT15	0.311777	0.147552	ES
RUFY3	-0.607585	0.0021046	ES
FLRT1	-0.20552	0.346824	ES
NTSR2	-0.242759	0.264378	ES
HIST4H4	-0.343573	0.108464	ES
B3GALT2	-0.67234	0.000440865	ES
HCN2	-0.138795	0.527656	ES
NCOA7	-0.544979	0.00716342	ES
AK5	0.0278008	0.899798	ES
PDE1A	-0.049664	0.821951	ES
FEZF2	0.0816665	0.711057	ES
KIAA1109	0.221189	0.310458	ES
USP20	-0.189648	0.386103	ES
PENK	-0.3747	0.0781342	ES
LDB1	-0.0977461	0.657261	ES
ARID4A	-0.175348	0.423553	ES
WWP1	0.0179914	0.935062	ES
NLGN2	0.0962057	0.662349	ES
EID3	-0.81479	2.20623e-06	ES
MYOM1	0.131108	0.550982	ES
GFRA1	-0.546438	0.00698006	ES
PPAPDC3	-0.76248	2.34343e-05	ES
RPS6KL1	-0.429715	0.0407131	ES
FAM50B	-0.763004	2.29546e-05	ES
HMOX2	-0.227164	0.297231	ES
CHAD	-0.439527	0.0358601	ES
ASPDH	-0.236082	0.278147	ES
PABPC5	-0.772984	1.53291e-05	ES
CCDC108	-0.156447	0.475931	ES
TRAPPC9	0.00515914	0.981361	ES
TACR1	-0.33204	0.121647	ES
TMEM52	-0.687401	0.000290057	ES
BMP8A	-0.47	0.0236348	ES
AIFM3	0.0516862	0.814821	ES
SDHA	0.0240557	0.913243	ES
DLG2	-0.363925	0.0878037	ES
PRDM2	-0.0419671	0.84921	ES
PCDHGB6	0.188807	0.388254	ES
FAM131B	-0.292738	0.175243	ES
FAM131C	-0.172347	0.431654	ES
SPTB	0.282138	0.192126	ES
ATP8A1	-0.352186	0.0993265	ES
SHISA7	-0.229402	0.292367	ES
CDC42BPB	-0.137746	0.530813	ES
TPD52	-0.617455	0.00169498	ES
PCDHGB1	0.338582	0.114034	ES
PCDHGB5	-0.217487	0.318831	ES
PCDHGB4	-0.257385	0.235764	ES
SYT11	-0.0551968	0.802477	ES
PCDHGA7	0.00413094	0.985075	ES
PCDHGA4	0.0772697	0.726015	ES
KBTBD11	-0.326467	0.128416	ES
DRD5	0.22543	0.301032	ES
TMEFF2	-0.270085	0.212629	ES
FTO	-0.49152	0.0172202	ES
KLHL26	-0.76068	2.51478e-05	ES
CCNDBP1	-0.333852	0.119502	ES
PPFIA2	0.0202349	0.926984	ES
RTN4	-0.194266	0.374425	ES
KIF1A	-0.293989	0.173321	ES
SELM	-0.512065	0.0124919	ES
RASAL1	-0.173969	0.427266	ES
PCDHGA3	-0.00453814	0.983604	ES
LY6H	-0.446422	0.0327322	ES
AARS	-0.166317	0.448179	ES
C5orf53	-0.133139	0.544772	ES
ADARB2	-0.271683	0.209829	ES
YOD1	-0.536624	0.00829224	ES
PHACTR3	0.238652	0.272794	ES
PLIN5	-0.591973	0.00292284	ES
ZSCAN18	0.0195118	0.929587	ES
ANO8	-0.584121	0.00342675	ES
SNCA	0.124141	0.572516	ES
MAST3	-0.301469	0.162131	ES
ZFYVE1	-0.298691	0.166226	ES
LRRC8B	-0.359137	0.0923758	ES
CRTAC1	0.0728412	0.741179	ES
LOC100302640	-0.164222	0.453997	ES
ANKH	0.305885	0.155767	ES
FBRSL1	-0.208547	0.33961	ES
C10orf137	-0.296814	0.169034	ES
KIAA0664	-0.378207	0.0751681	ES
KLHL2	0.125542	0.568158	ES
ZFYVE21	-0.160732	0.463777	ES
ABCA3	-0.181715	0.406643	ES
ATP2C2	0.1573	0.4735	ES
CHGA	-0.351739	0.0997855	ES
KIAA1244	-0.370962	0.0813937	ES
POU5F1B	0.0664814	0.76312	EI
IGFBP5	-0.511632	0.0125791	EI
PHLDA1	-0.223884	0.304447	EI
GSDMD	-0.552582	0.00625	EI
LPAR6	0.0860543	0.696232	EI
SRI	-0.225781	0.300259	EI
LGALS1	-0.22877	0.293735	EI
LOX	-0.558497	0.00560852	EI
ALPP	0.180592	0.409597	EI
LIMD1	-0.400179	0.0584765	EI
IFITM4P	-0.0180558	0.93483	EI
SLC22A18	0.526772	0.00980857	EI
C4orf52	0.0503621	0.819488	EI
ERBB2	-0.56159	0.00529558	EI
FKBP10	-0.432075	0.0395011	EI
PDPN	-0.742039	5.05056e-05	EI
FAM72B	-0.138581	0.528299	EI
SNORA71D	-0.171926	0.432796	EI
SAA2	0.173318	0.429025	EI
XRN2	-0.354599	0.0968711	EI
LOC282997	-0.143523	0.513548	EI
STAG3L4	-0.307754	0.153127	EI
GNG11	-0.411785	0.0508979	EI
BMF	-0.468462	0.0241581	EI
MRPS23	-0.0522163	0.812954	EI
ZNF284	-0.310358	0.149502	EI
SPATA12	0.23451	0.281452	EI
LAMA2	-0.459661	0.0273345	EI
WDR38	-0.195321	0.371784	EI
C10orf11	-0.0584335	0.791136	EI
MBD2	-0.172386	0.431548	EI
INMT	0.0529726	0.810293	EI
DMRTB1	0.00736718	0.973386	EI
PRCP	0.177638	0.417427	EI
ROR1	0.245877	0.258099	EI
SNRPD2	-0.0310589	0.888122	EI
TNFRSF19	-0.419213	0.0464626	EI
S100A6	-0.575965	0.00402575	EI
CRCP	0.285309	0.186963	EI
VIM	-0.709317	0.000150755	EI
TMEM106A	-0.587186	0.00322198	EI
KARS	-0.106578	0.628379	EI
TBCA	0.387574	0.0676604	EI
TMEM51	-0.103119	0.639632	EI
SC65	-0.382169	0.0719189	EI
WFDC5	-0.169016	0.440743	EI
FRRS1	-0.245941	0.257971	EI
TIMM8B	0.212425	0.330498	EI
GLB1	0.204984	0.34811	EI
CCT6A	0.332305	0.121331	EI
SLC30A5	-0.623449	0.00148101	EI
CCT6P1	0.604473	0.00224999	EI
RUVBL1	0.249056	0.251798	EI
EIF4EBP1	-0.132196	0.547651	EI
MEOX2	-0.446389	0.0327468	EI
MRPS14	0.337346	0.115445	EI
LOXL3	-0.269435	0.213775	EI
FZD7	-0.358549	0.0929499	EI
HIST1H1D	-0.0868424	0.69358	EI
BCL2L14	-0.347435	0.104293	EI
ATF5	-0.262936	0.225457	EI
ING3	-0.298371	0.166702	EI
PLSCR2	0.198849	0.363036	EI
CELP	0.305284	0.156623	EI
MTTP	-0.324171	0.131282	EI
STK33	-0.419548	0.0462699	EI
ENY2	-0.103853	0.637239	EI
HIST1H3F	0.426391	0.0424688	EI
ZNF645	0.0216686	0.921825	EI
PSMB8	-0.571081	0.00442484	EI
FAM162A	-0.150338	0.493535	EI
IL4	0.261602	0.227906	EI
GNS	-0.131396	0.5501	EI
CYCSP52	0.0357214	0.871454	EI
HIBADH	-0.119869	0.585902	EI
NUP205	-0.161854	0.460623	EI
ZNF217	-0.315179	0.14295	EI
HIST1H2BH	0.101792	0.643967	EI
HIST1H2BJ	0.207816	0.341344	EI
AWAT2	0.201469	0.356616	EI
CEP70	0.0814385	0.71183	EI
CHCHD3	-0.0530045	0.81018	EI
SLC39A8	-0.217322	0.319206	EI
ZNF180	-0.0628617	0.775687	EI
VRK1	0.212588	0.33012	EI
SNTB1	0.125838	0.567239	EI
FAP	-0.141363	0.519972	EI
ANKRD53	-0.317262	0.140184	EI
PAK1IP1	-0.0170252	0.938543	EI
RSL24D1	0.120461	0.58404	EI
C1QTNF1	0.100523	0.648126	EI
CCT7	-0.0132382	0.952195	EI
SNCAIP	-0.765551	2.07453e-05	EI
ZNF530	0.00536623	0.980613	EI
C1QBP	0.022297	0.919565	EI
ATP5F1	-0.062705	0.776233	EI
PRUNE	0.204344	0.349649	EI
PSME2	-0.46001	0.0272026	EI
MAML2	-0.270805	0.211364	EI
ANTXR2	-0.453756	0.0296468	EI
GNB2L1	-0.228719	0.293845	EI
HSPA7	0.0978593	0.656888	EI
PPIC	-0.02413	0.912976	EI
LOC731779	-0.540161	0.00779759	EI
SOX9	-0.642761	0.00094061	EI
SHOX2	-0.080503	0.715005	EI
PTAFR	-0.117056	0.594788	EI
SFRP4	-0.481669	0.0199539	EI
PSMA5	-0.0638879	0.772118	EI
C16orf63	0.0664944	0.763075	EI
NOTCH3	-0.468682	0.0240827	EI
SDHD	0.235818	0.278699	EI
CD3EAP	0.118184	0.591219	EI
EIF3M	0.230851	0.289243	EI
NME2	0.218489	0.31655	EI
UBTD2	-0.0112399	0.959405	EI
C8orf59	0.146707	0.50415	EI
DNAJB9	0.130463	0.552958	EI
CALU	0.153814	0.483481	EI
TP53I3	-0.454191	0.0294713	EI
NACA	-0.110602	0.615391	EI
ZBTB9	-0.390522	0.0654206	EI
AEBP1	-0.655099	0.000692408	EI
C3orf21	0.13802	0.529987	EI
MMP14	-0.401112	0.0578369	EI
WDR93	-0.439251	0.0359901	EI
SCLT1	-0.355842	0.0956244	EI
C1orf61	-0.862851	1.17715e-08	EI
ST7OT1	-0.669031	0.000481835	EI
MCM2	0.098377	0.655182	EI
CCDC40	-0.148859	0.497845	EI
BBOX1	-0.389183	0.0664303	EI
FLJ25758	0.313751	0.144869	EI
CASP1	-0.649958	0.00078797	EI
TLX1NB	-0.291431	0.177268	EI
EFEMP1	0.121433	0.580986	EI
OSTC	0.0954642	0.664804	EI
MRPS33	0.0323032	0.883669	EI
PDLIM2	0.0816328	0.711171	EI
IL17B	-0.194789	0.373114	EI
RBPMS	-0.320728	0.135667	EI
MAB21L1	-0.594531	0.00277281	EI
ATP4B	-0.337679	0.115063	EI
METTL7B	0.332255	0.12139	EI
DDAH2	-0.196134	0.369758	EI
GALNT5	-0.107622	0.624999	EI
DGAT2L6	-0.0749289	0.734019	EI
ASCL1	-0.254963	0.240355	EI
IGF2BP3	-0.318895	0.138043	EI
MRPS15	-0.200416	0.359188	EI
NLRP11	-0.455884	0.0287963	EI
CD248	-0.442927	0.0342895	EI
MS4A10	0.253256	0.243627	EI
PON2	-0.307896	0.152928	EI
EHD2	-0.495631	0.0161731	EI
CD58	-0.340527	0.111839	EI
UGT1A6	-0.0889801	0.686405	EI
TSGA13	-0.0628103	0.775866	EI
APOA4	-0.311657	0.147716	EI
RRAS	-0.424051	0.0437401	EI
CHI3L1	-0.624664	0.00144055	EI
HMHB1	-0.222771	0.306921	EI
CAMP	-0.520191	0.0109436	EI
FOXJ1	-0.347382	0.10435	EI
GALM	-0.128302	0.559611	EI
HPD	-0.341411	0.110852	EI
C6orf15	0.0696897	0.752028	EI
ZNF79	0.226721	0.298199	EI
ADAM9	-0.115706	0.599074	EI
RPL5	-0.0413788	0.851301	EI
CPXCR1	-0.0634219	0.773739	EI
MOV10	-0.155726	0.477993	EI
APOBEC3D	-0.31067	0.149071	EI
FUCA1	0.0318579	0.885263	EI
CEACAM8	-0.182037	0.405798	EI
TMEM154	-0.536436	0.00831928	EI
SNORA71B	-0.106924	0.627259	EI
CLU	-0.292963	0.174897	EI
SF3B3	-0.346	0.10583	EI
CNIH4	-0.128708	0.558359	EI
TCF7L1	-0.277116	0.200497	EI
IKBIP	0.0520282	0.813617	EI
NOX4	-0.115048	0.601167	EI
GBGT1	-0.548	0.00678799	EI
C12orf74	-0.0299643	0.892043	EI
CENPE	0.123269	0.575238	EI
RAMP1	-0.23124	0.288409	EI
ZBTB8OS	-0.25983	0.231185	EI
EZH2	0.242254	0.265403	EI
RB1	-0.0189269	0.931692	EI
RPS3A	-0.0676922	0.758928	EI
ZCCHC9	0.101091	0.646264	EI
DARS	-0.122872	0.576479	EI
SLC2A10	-0.681922	0.000338705	EI
LOC645323	-0.75541	3.08167e-05	EI
PSMD5	-0.462457	0.0262914	EI
NUSAP1	0.272423	0.208542	EI
COL18A1	0.193078	0.377411	EI
