# Supplementary material for: Integrative analysis of DNA methylation and gene expression to identify key epigenetic genes in glioblastoma
Source: Aging (Albany NY). 2019 Aug 8;11(15):5579–92. doi: 10.18632/aging.102139 (PMC6710056; doi:10.18632/aging.102139)
Supplement: Supplementary Table 9 [file aging-11-102139-s004.xlsx]

## Sheet: Sheet1
cg site	GBM_11.001	GBM_11.002	GBM_11.003	GBM_11.004	GBM_11.005	GBM_11.006	GBM_11.007	GBM_11.008	GBM_11.009	GBM_11.010	GBM_11.011	GBM_11.012	GBM_11.013	GBM_11.014	GBM_11.015	GBM_11.016	GBM_11.017	GBM_11.018	GBM_11.019	GBM_11.020	GBM_11.021	GBM_11.022	GBM_11.023	GBM_11.024	GBM_11.025	GBM_11.026	GBM_11.027	GBM_11.028	GBM_11.029	GBM_11.030	GBM_11.031	GBM_11.032	GBM_11.033	GBM_11.034	GBM_11.035	GBM_11.036	GBM_11.037	GBM_11.038	GBM_11.039	GBM_11.040	GBM_11.041	GBM_11.042	GBM_11.043	GBM_11.044	GBM_11.045	GBM_11.046	GBM_11.047	GBM_11.048	GBM_11.049
cg01570885	0.88632	0.890244	0.72892	0.49426	0.543126	0.879628	0.351299	0.836756	0.856165	0.449965	0.474662	0.251821	0.892526	0.489705	0.359568	0.864481	0.86711	0.85143	0.86713	0.858074	0.829722	0.493597	0.744054	0.48991	0.56018	0.744678	0.415675	0.598931	0.571377	0.521632	0.475002	0.832999	0.38639	0.887317	0.282982	0.863282	0.737257	0.507801	0.831109	0.853247	0.481632	0.542577	0.808918	0.528648	0.762793	0.916759	0.488274	0.629871	0.864778
cg01905633	0.845956	0.835074	0.601001	0.50443	0.493368	0.866424	0.369336	0.829367	0.884014	0.467664	0.499526	0.25317	0.912826	0.509071	0.391094	0.835384	0.890764	0.774718	0.811006	0.591529	0.841728	0.506122	0.720386	0.458351	0.542782	0.497067	0.476021	0.486009	0.400937	0.528476	0.463539	0.898283	0.387713	0.871792	0.274824	0.651574	0.571313	0.51273	0.800678	0.832376	0.522642	0.534295	0.598745	0.520646	0.561921	0.918444	0.510961	0.538625	0.845393
cg03954573	0.865012	0.835518	0.602236	0.615371	0.584843	0.830745	0.480782	0.805292	0.844914	0.578573	0.592276	0.353749	0.843725	0.601968	0.478647	0.816185	0.838893	0.824876	0.818646	0.773593	0.819596	0.605964	0.751521	0.569418	0.635945	0.613807	0.569018	0.614974	0.591397	0.626916	0.555402	0.841304	0.514449	0.826308	0.383378	0.759637	0.672039	0.593909	0.797298	0.822888	0.586337	0.626578	0.766232	0.620053	0.665287	0.851763	0.603757	0.634597	0.824472
cg04447621	0.854055	0.827266	0.426772	0.574514	0.603558	0.867148	0.482467	0.834882	0.792157	0.576997	0.576727	0.268558	0.882687	0.595275	0.510777	0.837696	0.79702	0.77505	0.666615	0.621213	0.847757	0.594297	0.755025	0.551008	0.742858	0.596191	0.523077	0.650108	0.570593	0.597108	0.547967	0.873087	0.451352	0.861718	0.320497	0.710596	0.611617	0.579643	0.740745	0.815634	0.589256	0.625575	0.788061	0.638702	0.651476	0.891908	0.603854	0.666645	0.801433
cg07898446	0.915669	0.920988	0.73983	0.503321	0.53202	0.962354	0.379949	0.843853	0.89165	0.463539	0.470523	0.225889	0.915877	0.484274	0.36048	0.917458	0.916129	0.854121	0.882163	0.886902	0.816365	0.481868	0.723425	0.470552	0.544391	0.765724	0.495471	0.541751	0.565177	0.504005	0.449369	0.902191	0.367026	0.887601	0.266168	0.834352	0.683204	0.460255	0.78869	0.846825	0.477706	0.543346	0.777338	0.523887	0.735986	0.941617	0.471027	0.583634	0.836487
cg09938227	0.110916	0.0703021	0.139476	0.0973472	0.0583603	0.0668028	0.138685	0.0854644	0.0745337	0.294177	0.0833022	0.179648	0.0929454	0.0922546	0.0778331	0.0861409	0.0808403	0.0954003	0.0992212	0.0878199	0.0898961	0.084886	0.0890128	0.104924	0.075795	0.107292	0.0799564	0.0847435	0.147503	0.113261	0.0799501	0.0863196	0.131726	0.100587	0.153341	0.0859533	0.115131	0.0890642	0.100172	0.0919092	0.11914	0.190239	0.093818	0.0845468	0.0972555	0.100124	0.114669	0.101765	0.0938828
cg12497786	0.905085	0.811329	0.389494	0.632224	0.60849	0.788434	0.485561	0.838669	0.714749	0.596394	0.660123	0.342749	0.928435	0.657737	0.543986	0.917886	0.921405	0.878325	0.747851	0.793791	0.858881	0.676174	0.820355	0.601559	0.439474	0.641855	0.60614	0.418574	0.662484	0.710031	0.52979	0.930778	0.540916	0.923265	0.370534	0.883379	0.643879	0.701579	0.801155	0.753303	0.65641	0.713766	0.758884	0.691225	0.715748	0.868975	0.670845	0.645243	0.485399
cg12840312	0.896464	0.909326	0.734234	0.570648	0.560927	0.930011	0.41456	0.859525	0.911986	0.560606	0.579533	0.303122	0.918249	0.581438	0.466398	0.902026	0.909052	0.802332	0.788959	0.658889	0.880063	0.569664	0.743564	0.514941	0.603665	0.568914	0.539576	0.536595	0.442712	0.540396	0.523471	0.90512	0.454309	0.903259	0.34528	0.704799	0.615886	0.582088	0.81151	0.858789	0.566025	0.615317	0.733318	0.564153	0.704893	0.916723	0.567082	0.597466	0.884114
cg13101072	0.858917	0.877451	0.727557	0.498712	0.761131	0.827398	0.39969	0.824532	0.79559	0.480078	0.497518	0.455957	0.875856	0.82387	0.419803	0.818014	0.84011	0.790656	0.82868	0.825545	0.799193	0.629812	0.727413	0.61722	0.801878	0.790167	0.470925	0.807625	0.561138	0.6957	0.465427	0.841654	0.490051	0.855474	0.416431	0.850056	0.775496	0.599429	0.81536	0.841217	0.542859	0.615488	0.800119	0.776098	0.78477	0.852981	0.563279	0.767306	0.84268
cg13289019	0.813802	0.837171	0.609758	0.415924	0.473812	0.905945	0.342507	0.756824	0.810996	0.393427	0.418646	0.23802	0.836836	0.444796	0.363789	0.825821	0.798665	0.76577	0.796539	0.764429	0.730044	0.456632	0.600071	0.402279	0.457324	0.615368	0.41984	0.449999	0.438094	0.455374	0.388173	0.841558	0.340907	0.795466	0.249048	0.737059	0.587342	0.431625	0.715929	0.77127	0.41428	0.485163	0.692069	0.441762	0.610688	0.904844	0.439708	0.514023	0.792149
cg17739279	0.920294	0.941681	0.822523	0.639526	0.777275	0.898978	0.413297	0.883753	0.894568	0.58294	0.58972	0.283973	0.921968	0.649035	0.46785	0.869409	0.927236	0.893277	0.895108	0.907165	0.855148	0.626519	0.821994	0.573331	0.741608	0.864051	0.549011	0.746627	0.734958	0.612555	0.561502	0.947285	0.484661	0.941774	0.298825	0.925328	0.833991	0.592196	0.881906	0.946134	0.596353	0.682664	0.888097	0.713271	0.855156	0.958194	0.630945	0.814336	0.939442
cg18197332	0.923601	0.869391	0.611564	0.623957	0.636391	0.903165	0.49138	0.861776	0.919308	0.619575	0.603041	0.2863	0.923587	0.623989	0.498319	0.914022	0.922203	0.900417	0.87914	0.750375	0.90105	0.611474	0.816451	0.565167	0.718396	0.653934	0.59845	0.642471	0.630429	0.643246	0.587175	0.946721	0.48131	0.90928	0.297671	0.742156	0.735335	0.615636	0.865991	0.829599	0.622782	0.674176	0.784318	0.632295	0.775936	0.964271	0.642786	0.680553	0.932498
cg18487516	0.886364	0.846711	0.473603	0.592473	0.563785	0.846916	0.452253	0.789456	0.860215	0.567052	0.629109	0.305255	0.892251	0.617048	0.513397	0.832236	0.865801	0.839545	0.677401	0.567424	0.844035	0.607988	0.757462	0.560452	0.706995	0.627852	0.580738	0.640746	0.555109	0.638881	0.574034	0.778624	0.48867	0.884156	0.36065	0.84125	0.622378	0.612172	0.828454	0.628464	0.609615	0.658642	0.794922	0.629165	0.724809	0.904813	0.613985	0.65973	0.874082
cg18656763	0.574368	0.53535	0.589018	0.486973	0.449284	0.7966	0.337765	0.757515	0.786146	0.454145	0.45066	0.262917	0.797013	0.41575	0.352328	0.652016	0.729352	0.618365	0.776201	0.615823	0.701437	0.443618	0.650124	0.377737	0.500724	0.503315	0.449153	0.46649	0.39661	0.50675	0.411776	0.7685	0.396639	0.81372	0.315485	0.632178	0.596518	0.475821	0.68368	0.768134	0.493091	0.517989	0.713571	0.297528	0.60771	0.716318	0.478666	0.563528	0.777619
cg18872973	0.785329	0.82141	0.72823	0.557267	0.645871	0.816775	0.424718	0.782176	0.83453	0.535032	0.534168	0.308334	0.84036	0.582285	0.453983	0.797251	0.818111	0.74827	0.818665	0.781813	0.796662	0.570209	0.746922	0.562789	0.637228	0.764425	0.527811	0.686241	0.624659	0.60472	0.563083	0.787199	0.524021	0.84923	0.396806	0.82189	0.777693	0.58334	0.779303	0.80205	0.557931	0.647013	0.791047	0.613654	0.759009	0.777627	0.555106	0.732304	0.797935
cg21177626	0.835151	0.831255	0.561237	0.490332	0.44896	0.919168	0.344935	0.781034	0.839155	0.415862	0.456219	0.210744	0.848763	0.447864	0.380269	0.8189	0.866181	0.806061	0.836298	0.812116	0.811013	0.4451	0.68763	0.410455	0.522407	0.526247	0.442835	0.36009	0.511483	0.467778	0.399005	0.896903	0.327368	0.834765	0.211749	0.7171	0.539043	0.434583	0.719323	0.719969	0.453047	0.466179	0.757764	0.507268	0.612406	0.92015	0.411043	0.531289	0.82307
cg21740964	0.832149	0.770159	0.585011	0.620439	0.639454	0.849187	0.388222	0.846972	0.851096	0.660497	0.598679	0.28593	0.877082	0.647895	0.527801	0.860483	0.855138	0.814559	0.739757	0.709605	0.855634	0.591368	0.781047	0.621761	0.586691	0.637386	0.654538	0.58211	0.534781	0.533314	0.484497	0.856284	0.471651	0.816685	0.426572	0.790803	0.643856	0.567677	0.801931	0.824825	0.497511	0.612453	0.778134	0.586803	0.703147	0.870786	0.581482	0.617677	0.757034
cg23835083	0.805497	0.819954	0.73045	0.588721	0.561452	0.794417	0.450982	0.795519	0.822711	0.566397	0.561503	0.317511	0.838244	0.582619	0.458032	0.801105	0.80947	0.766737	0.755394	0.584171	0.798943	0.602133	0.712912	0.542451	0.630084	0.590565	0.52605	0.624101	0.565358	0.624864	0.520278	0.817708	0.463268	0.840465	0.366112	0.771162	0.612157	0.604649	0.799789	0.807091	0.612604	0.650003	0.790269	0.606138	0.763211	0.815472	0.591009	0.632936	0.829807
cg25195497	0.854311	0.879269	0.733849	0.598709	0.592219	0.862368	0.370982	0.857854	0.86272	0.648332	0.613756	0.275559	0.879201	0.631927	0.547473	0.874588	0.891307	0.829165	0.867895	0.819736	0.858139	0.514759	0.818895	0.570472	0.630059	0.700445	0.626981	0.567194	0.559323	0.547308	0.485886	0.838273	0.488467	0.865178	0.420033	0.83125	0.706007	0.588857	0.818016	0.860835	0.497429	0.625927	0.814121	0.609586	0.755198	0.889075	0.575498	0.6391	0.85822
cg27445347	0.771585	0.794258	0.688483	0.525571	0.652051	0.773566	0.458647	0.751675	0.626024	0.534253	0.534277	0.392819	0.817227	0.774058	0.47356	0.764246	0.793105	0.70592	0.76353	0.593741	0.782028	0.582312	0.709896	0.578584	0.690841	0.734077	0.516004	0.628706	0.527109	0.599825	0.517141	0.781672	0.517155	0.81689	0.484326	0.774782	0.730299	0.540941	0.758072	0.821116	0.565884	0.617646	0.755428	0.590866	0.746947	0.793927	0.579689	0.641431	0.791781
[truncated: 93 more columns]
